# Supplementary material
Source: publisher figshare collection journal article supplement (https://gsajournals.figshare.com/articles/dataset/_/7176383)
Supplement: Supplementary file 1 [file 1]

## Sheet: Filtered Data
Peptide/Charge	Accession	Description	Intensity Rad53 KO	Intensity Rad53 KO	Intensity Rad53 Overexp	Intensity Rad53 Overexp	Log Ratio Overexp / KO	Log Ratio Overexp / KO	Average Log Ratio Overexp / KO	T-test	Correlation
_S(ph)YKNDDEVFK_2	P39009	>sp|P39009|DUN1_YEAST DNA damage response protein kinase DUN1 OS=Saccharomyces cerevisiae (strain ATCC 204508 / S288c) GN=DUN1 PE=1 SV=1	43504	131130	13654000	34374000	2.49673	2.41853	2.45763	0.129576	0.554154
_IVVNEKES(ph)QDLKK_3	P22147	>sp|P22147|XRN1_YEAST 5-3 exoribonuclease 1 OS=Saccharomyces cerevisiae (strain ATCC 204508 / S288c) GN=XRN1 PE=1 SV=1	16138	41645	4476100	8579700	2.44305	2.31391	2.37848	0.0967728
_YASSSS(ph)TDIENDDEK_2	P39009	>sp|P39009|DUN1_YEAST DNA damage response protein kinase DUN1 OS=Saccharomyces cerevisiae (strain ATCC 204508 / S288c) GN=DUN1 PE=1 SV=1	10548	34184	2214700	8415200	2.32214	2.39124	2.35669	0.16814
_GQLEEQHRS(ph)S(ph)S(ph)NLSLDSLSK_3	P34217	>sp|P34217|PIN4_YEAST RNA-binding protein PIN4 OS=Saccharomyces cerevisiae (strain ATCC 204508 / S288c) GN=PIN4 PE=1 SV=1	21577	35246	3147100	9283900	2.16392	2.42062	2.29227	0.146265
_NLSS(ph)FEK_2	P47083	>sp|P47083|MPP10_YEAST U3 small nucleolar RNA-associated protein MPP10 OS=Saccharomyces cerevisiae (strain ATCC 204508 / S288c) GN=MPP10 PE=1 SV=1	40977	68839	3223900	9938900	1.89584	2.1595	2.02767	0.150702
_S(ph)SFTFGSTTIEK_2	P32499	>sp|P32499|NUP2_YEAST Nucleoporin NUP2 OS=Saccharomyces cerevisiae (strain ATCC 204508 / S288c) GN=NUP2 PE=1 SV=2	70694	101720	5768800	14083000	1.9117	2.14129	2.0265	0.126814
_EASAAYES(ph)FKKEQEQQTEQA_3	P04147	>sp|P04147|PABP_YEAST Polyadenylate-binding protein, cytoplasmic and nuclear OS=Saccharomyces cerevisiae (strain ATCC 204508 / S288c) GN=PAB1 PE=1 SV=4	69110	51758	4390100	8356200	1.80293	2.20803	2.00548	0.0972834
_ENS(ph)LETTFSSVNTR_3	Q01560	>sp|Q01560|NOP3_YEAST Nucleolar protein 3 OS=Saccharomyces cerevisiae (strain ATCC 204508 / S288c) GN=NPL3 PE=1 SV=1	215460	379120	17395000	43103000	1.90706	2.05573	1.98139	0.128304
_EHS(ph)GDVTDSSFK_3	P39009	>sp|P39009|DUN1_YEAST DNA damage response protein kinase DUN1 OS=Saccharomyces cerevisiae (strain ATCC 204508 / S288c) GN=DUN1 PE=1 SV=1	45390	203270	5502400	14217000	2.08359	1.84473	1.96416	0.131799
_(ac)S(ph)FQIETVPTKPYEDQKPGTSGLR_3	P37012	>sp|P37012|PGM2_YEAST Phosphoglucomutase-2 OS=Saccharomyces cerevisiae (strain ATCC 204508 / S288c) GN=PGM2 PE=1 SV=1	62321	116000	4002400	14681000	1.80769	2.1023	1.95499	0.165905
_YAS(ph)SSS(ph)TDIENDDEKVSSESR_3	P39009	>sp|P39009|DUN1_YEAST DNA damage response protein kinase DUN1 OS=Saccharomyces cerevisiae (strain ATCC 204508 / S288c) GN=DUN1 PE=1 SV=1	35286	173340	3878800	12594000	2.04109	1.86126	1.95118	0.154475
_VDLMREES(ph)ALEHQK_3	P32481	>sp|P32481|IF2G_YEAST Eukaryotic translation initiation factor 2 subunit gamma OS=Saccharomyces cerevisiae (strain ATCC 204508 / S288c) GN=GCD11 PE=1 SV=1	80036	217670	9782300	13470000	2.08716	1.79157	1.93936	0.0488416
_ENS(ph)LETTFSSVNTR_2	Q01560	>sp|Q01560|NOP3_YEAST Nucleolar protein 3 OS=Saccharomyces cerevisiae (strain ATCC 204508 / S288c) GN=NPL3 PE=1 SV=1	978100	1891200	71452000	166040000	1.86363	1.94348	1.90355	0.120915
_SNS(ph)FNLQSAR_2	P31380	>sp|P31380|FUN30_YEAST ATP-dependent helicase FUN30 OS=Saccharomyces cerevisiae (strain ATCC 204508 / S288c) GN=FUN30 PE=1 SV=1	39692	101470	2970500	7971400	1.87413	1.8952	1.88466	0.136524
_NTAS(ph)FAGS(ph)KK_2	P27476	>sp|P27476|NSR1_YEAST Nuclear localization sequence-binding protein OS=Saccharomyces cerevisiae (strain ATCC 204508 / S288c) GN=NSR1 PE=1 SV=1	42682	150150	3661900	9066800	1.93346	1.78093	1.8572	0.127267
_LES(ph)FQAVYNK_2	P48164;P26786	>sp|P48164|RS7B_YEAST 40S ribosomal protein S7-B OS=Saccharomyces cerevisiae (strain ATCC 204508 / S288c) GN=RPS7B PE=1 SV=1;>sp|P26786|RS7A_YEAST 40S ribosomal protein S7-A OS=Saccharomyces cerevisiae (strain ATCC 204508 / S288c) GN=RPS7A PE=1 SV=4	107770	156000	4347400	15125000	1.60573	1.98657	1.79615	0.162147
_GT(ph)TSFNEEGNRK_2	P47035	>sp|P47035|NET1_YEAST Nucleolar protein NET1 OS=Saccharomyces cerevisiae (strain ATCC 204508 / S288c) GN=NET1 PE=1 SV=1	87974	145790	3744700	13303000	1.62906	1.96022	1.79464	0.163711
_SCS(ph)FLFK_2	P39009	>sp|P39009|DUN1_YEAST DNA damage response protein kinase DUN1 OS=Saccharomyces cerevisiae (strain ATCC 204508 / S288c) GN=DUN1 PE=1 SV=1	40705	111600	2710500	6105400	1.8234	1.73805	1.78073	0.116614
_AQTLNS(ph)NPEILLR_2	P40693	>sp|P40693|RLP7_YEAST Ribosome biogenesis protein RLP7 OS=Saccharomyces cerevisiae (strain ATCC 204508 / S288c) GN=RLP7 PE=1 SV=1	44090	88253	2431800	5738800	1.74159	1.81309	1.77734	0.122738
_TPS(ph)ELQEEQER_2	Q06336	>sp|Q06336|GGA1_YEAST ADP-ribosylation factor-binding protein GGA1 OS=Saccharomyces cerevisiae (strain ATCC 204508 / S288c) GN=GGA1 PE=1 SV=1	18276	37791	818770	2723100	1.65128	1.85768	1.75448	0.157781
_EIS(ph)DIKKDDQK_3	P35732	>sp|P35732|DEF1_YEAST RNA polymerase II degradation factor 1 OS=Saccharomyces cerevisiae (strain ATCC 204508 / S288c) GN=DEF1 PE=1 SV=1	1134800	1329900	59692000	81128000	1.721	1.78535	1.75317	0.0484897
_LIS(ph)HAGSLTNLSK_3	Q12460	>sp|Q12460|NOP56_YEAST Nucleolar protein 56 OS=Saccharomyces cerevisiae (strain ATCC 204508 / S288c) GN=NOP56 PE=1 SV=1	38486	96795	2688000	4364200	1.84413	1.65405	1.74909	0.0731389
_NISLSS(ph)NGS(ph)NTNSTIILVK_2	P11075	>sp|P11075|SEC7_YEAST Protein transport protein SEC7 OS=Saccharomyces cerevisiae (strain ATCC 204508 / S288c) GN=SEC7 PE=1 SV=2	20582	49755	1348900	2279800	1.81649	1.66106	1.73878	0.0790001
_TTNTTPSFS(ph)FGAK_2	P14907	>sp|P14907|NSP1_YEAST Nucleoporin NSP1 OS=Saccharomyces cerevisiae (strain ATCC 204508 / S288c) GN=NSP1 PE=1 SV=1	32208	152840	1764000	7552000	1.73853	1.69382	1.71618	0.176816
_TGPSPQPESQGS(ph)FYQR_2	P06634	>sp|P06634|DED1_YEAST ATP-dependent RNA helicase DED1 OS=Saccharomyces cerevisiae (strain ATCC 204508 / S288c) GN=DED1 PE=1 SV=2	148650	908780	11407000	28731000	1.88501	1.49989	1.69245	0.127606
_REHS(ph)GDVTDSSFK_3	P39009	>sp|P39009|DUN1_YEAST DNA damage response protein kinase DUN1 OS=Saccharomyces cerevisiae (strain ATCC 204508 / S288c) GN=DUN1 PE=1 SV=1	311280	692830	11545000	42938000	1.56924	1.79222	1.68073	0.16727
_QVS(ph)DIVNR_2	P05374	>sp|P05374|CHO2_YEAST Phosphatidylethanolamine N-methyltransferase OS=Saccharomyces cerevisiae (strain ATCC 204508 / S288c) GN=CHO2 PE=1 SV=1	330540	366410	9869300	26726000	1.47506	1.86297	1.66901	0.139479
_KNDEVSKPAFS(ph)FGAK_3	P14907	>sp|P14907|NSP1_YEAST Nucleoporin NSP1 OS=Saccharomyces cerevisiae (strain ATCC 204508 / S288c) GN=NSP1 PE=1 SV=1	22114	82880	1554100	2508000	1.84681	1.48088	1.66384	0.0706598
_VES(ph)GS(ph)QQTSIHSTPIVQK_3	P23585	>sp|P23585|HXT2_YEAST High-affinity glucose transporter HXT2 OS=Saccharomyces cerevisiae (strain ATCC 204508 / S288c) GN=HXT2 PE=1 SV=1	182420	79405	4326800	6841000	1.37509	1.93527	1.65518	0.0749703
_KDDNSSKPAFS(ph)FGAK_3	P14907	>sp|P14907|NSP1_YEAST Nucleoporin NSP1 OS=Saccharomyces cerevisiae (strain ATCC 204508 / S288c) GN=NSP1 PE=1 SV=1	64936	94533	2232400	5039400	1.53629	1.7268	1.63154	0.118505
_EVS(ph)GFGSLNR_2	P40693	>sp|P40693|RLP7_YEAST Ribosome biogenesis protein RLP7 OS=Saccharomyces cerevisiae (strain ATCC 204508 / S288c) GN=RLP7 PE=1 SV=1	221220	454140	6816300	25133000	1.48872	1.74305	1.61589	0.166879
_SAFS(ph)FGSKPTGK_2	P14907	>sp|P14907|NSP1_YEAST Nucleoporin NSP1 OS=Saccharomyces cerevisiae (strain ATCC 204508 / S288c) GN=NSP1 PE=1 SV=1	38003	78037	1326300	3694100	1.54282	1.67521	1.60902	0.141058
_LSALKKS(ph)NS(ph)DLEK_3	Q08491	>sp|Q08491|SKI7_YEAST Superkiller protein 7 OS=Saccharomyces cerevisiae (strain ATCC 204508 / S288c) GN=SKI7 PE=1 SV=1	87045	126910	2796100	6498800	1.50681	1.70934	1.60807	0.122038
_ELS(ph)DLER_2	P15731	>sp|P15731|UBC4_YEAST Ubiquitin-conjugating enzyme E2 4 OS=Saccharomyces cerevisiae (strain ATCC 204508 / S288c) GN=UBC4 PE=1 SV=1	84715	170330	2638800	8534800	1.49345	1.6999	1.59667	0.155667
_NEEQSS(ph)FSSPSAK_2	P32521	>sp|P32521|PAN1_YEAST Actin cytoskeleton-regulatory complex protein PAN1 OS=Saccharomyces cerevisiae (strain ATCC 204508 / S288c) GN=PAN1 PE=1 SV=2	48120	152770	1894500	6024600	1.59517	1.59589	1.59553	0.153024
_VS(ph)DDSESESGDKEATAPLIQR_2	Q08723	>sp|Q08723|RPN8_YEAST 26S proteasome regulatory subunit RPN8 OS=Saccharomyces cerevisiae (strain ATCC 204508 / S288c) GN=RPN8 PE=1 SV=3	18527	98017	901940	3065500	1.68737	1.4952	1.59129	0.157899
_AES(ph)DDKSDNYGA_2	P28004	>sp|P28004|PRP45_YEAST Pre-mRNA-processing protein 45 OS=Saccharomyces cerevisiae (strain ATCC 204508 / S288c) GN=PRP45 PE=1 SV=2	12106	37778	485030	1413300	1.60277	1.573	1.58788	0.144591
_DISLHS(ph)LK_2	P47035	>sp|P47035|NET1_YEAST Nucleolar protein NET1 OS=Saccharomyces cerevisiae (strain ATCC 204508 / S288c) GN=NET1 PE=1 SV=1	44097	138820	1578200	5796200	1.55375	1.62069	1.58722	0.165711
_ASKS(ph)NS(ph)LITSTDPVEDHISK_3	Q06146	>sp|Q06146|YL257_YEAST Uncharacterized protein YLR257W OS=Saccharomyces cerevisiae (strain ATCC 204508 / S288c) GN=YLR257W PE=1 SV=1	292780	1124300	11714000	41420000	1.60216	1.56633	1.58425	0.162086
_NES(ph)FNRR_2	P39705	>sp|P39705|NUP60_YEAST Nucleoporin NUP60 OS=Saccharomyces cerevisiae (strain ATCC 204508 / S288c) GN=NUP60 PE=1 SV=1	332400	493980	9308600	25763000	1.44722	1.71729	1.58226	0.141354
_STPYS(ph)FR_2	P38249	>sp|P38249|EIF3A_YEAST Eukaryotic translation initiation factor 3 subunit A OS=Saccharomyces cerevisiae (strain ATCC 204508 / S288c) GN=RPG1 PE=1 SV=1	20938	70277	754930	2573500	1.55697	1.56371	1.56034	0.15921
_IVFGKS(ph)CS(ph)FLFK_2	P39009	>sp|P39009|DUN1_YEAST DNA damage response protein kinase DUN1 OS=Saccharomyces cerevisiae (strain ATCC 204508 / S288c) GN=DUN1 PE=1 SV=1	62206	111670	2587700	3507700	1.61908	1.49709	1.55808	0.0464626
_NTAS(ph)FAGSKKT(ph)FD_2	P27476	>sp|P27476|NSR1_YEAST Nuclear localization sequence-binding protein OS=Saccharomyces cerevisiae (strain ATCC 204508 / S288c) GN=NSR1 PE=1 SV=1	64673	91313	1673400	4571500	1.41288	1.69953	1.5562	0.140267
_NQTS(ph)FSR_2	P40454	>sp|P40454|PTPA1_YEAST Serine/threonine-protein phosphatase 2A activator 1 OS=Saccharomyces cerevisiae (strain ATCC 204508 / S288c) GN=RRD1 PE=1 SV=1	28781	88834	965790	3373000	1.52578	1.57944	1.55261	0.161533
_KS(ph)S(ph)SFAHLQAPSPIPDPLQVSKPETR_4	Q12329	>sp|Q12329|HSP42_YEAST Heat shock protein 42 OS=Saccharomyces cerevisiae (strain ATCC 204508 / S288c) GN=HSP42 PE=1 SV=1	128330	40263000	51462000	123330000	2.60316	0.486163	1.54466	0.0738045
_LSNGFS(ph)FTK_2	P20676	>sp|P20676|NUP1_YEAST Nucleoporin NUP1 OS=Saccharomyces cerevisiae (strain ATCC 204508 / S288c) GN=NUP1 PE=1 SV=1	31689	127400	1358200	3632000	1.63206	1.45498	1.54352	0.134823
_GSGSEDS(ph)FVKR_2	P01097	>sp|P01097|ATIF_YEAST ATPase inhibitor, mitochondrial OS=Saccharomyces cerevisiae (strain ATCC 204508 / S288c) GN=INH1 PE=1 SV=2	96842	271840	2758200	11636000	1.45456	1.63149	1.54303	0.176775
_QASSFS(ph)FLNR_2	P32499	>sp|P32499|NUP2_YEAST Nucleoporin NUP2 OS=Saccharomyces cerevisiae (strain ATCC 204508 / S288c) GN=NUP2 PE=1 SV=2	84315	142650	2957400	4828000	1.54501	1.5295	1.53725	0.0749062
_ILDDGS(ph)NGEDATR_2	P38333	>sp|P38333|ENP1_YEAST Essential nuclear protein 1 OS=Saccharomyces cerevisiae (strain ATCC 204508 / S288c) GN=ENP1 PE=1 SV=1	154640	270630	3625600	13490000	1.37006	1.69764	1.53385	0.168267
_S(ph)GPAVQK_2	Q12211	>sp|Q12211|PUS1_YEAST tRNA pseudouridine synthase 1 OS=Saccharomyces cerevisiae (strain ATCC 204508 / S288c) GN=PUS1 PE=1 SV=1	287850	94622	3693300	7825300	1.10825	1.91751	1.51288	0.117922
_SAVSESS(ph)VTNSK_2	P47035	>sp|P47035|NET1_YEAST Nucleolar protein NET1 OS=Saccharomyces cerevisiae (strain ATCC 204508 / S288c) GN=NET1 PE=1 SV=1	24504	68334	672110	2640300	1.4382	1.58702	1.51261	0.171484
_SSAELSS(ph)IHAK_2	P53685	>sp|P53685|HST1_YEAST NAD-dependent protein deacetylase HST1 OS=Saccharomyces cerevisiae (strain ATCC 204508 / S288c) GN=HST1 PE=1 SV=1	9577.3	37702	380200	991630	1.59877	1.41999	1.50938	0.132043
_LHFFMVGYAPLTAIGSQS(ph)FR_3	P02557	>sp|P02557|TBB_YEAST Tubulin beta chain OS=Saccharomyces cerevisiae (strain ATCC 204508 / S288c) GN=TUB2 PE=1 SV=2	78560	69943	3108400	1767200	1.59734	1.40254	1.49994	0.0874628
_SAS(ph)SSSTINHVLK_3	Q06440	>sp|Q06440|CORO_YEAST Coronin-like protein OS=Saccharomyces cerevisiae (strain ATCC 204508 / S288c) GN=CRN1 PE=1 SV=1	96671	185060	2441900	7305600	1.40243	1.59634	1.49939	0.148723
_EIQSVNKPNS(ph)LHETVEK_3	P40340	>sp|P40340|TBP7_YEAST Tat-binding homolog 7 OS=Saccharomyces cerevisiae (strain ATCC 204508 / S288c) GN=YTA7 PE=1 SV=2	74405	154640	1464000	7642300	1.29394	1.6939	1.49392	0.191591
_ASHS(ph)SLLDNAK_2	Q12315	>sp|Q12315|GLE1_YEAST Nucleoporin GLE1 OS=Saccharomyces cerevisiae (strain ATCC 204508 / S288c) GN=GLE1 PE=1 SV=1	38880	92084	1290200	2650500	1.52093	1.45914	1.49004	0.105204
_RIGS(ph)GIK_2	P38840	>sp|P38840|ARO9_YEAST Aromatic amino acid aminotransferase 2 OS=Saccharomyces cerevisiae (strain ATCC 204508 / S288c) GN=ARO9 PE=1 SV=3	1360300	8424600	75452000	135790000	1.74404	1.20732	1.47568	0.0822908
_(ac)S(ph)SAIDNLFGNIDEK_2	Q08208	>sp|Q08208|NOP12_YEAST Nucleolar protein 12 OS=Saccharomyces cerevisiae (strain ATCC 204508 / S288c) GN=NOP12 PE=1 SV=1	26833	98002	1102100	2110100	1.61355	1.33307	1.47331	0.0937773
_KENS(ph)TIQSSSSSNLR_3	P32644	>sp|P32644|ECM32_YEAST Putative ATP-dependent RNA helicase ECM32 OS=Saccharomyces cerevisiae (strain ATCC 204508 / S288c) GN=ECM32 PE=1 SV=1	27042	98984	670130	3369100	1.39412	1.53195	1.46303	0.188191
_IFTEAS(ph)FEK_2	P38187	>sp|P38187|UBP13_YEAST Ubiquitin carboxyl-terminal hydrolase 13 OS=Saccharomyces cerevisiae (strain ATCC 204508 / S288c) GN=UBP13 PE=1 SV=3	36272	166930	1410700	3616500	1.58986	1.33575	1.46281	0.129311
_QSSTVS(ph)STGSK_2	P17555	>sp|P17555|CAP_YEAST Adenylyl cyclase-associated protein OS=Saccharomyces cerevisiae (strain ATCC 204508 / S288c) GN=SRV2 PE=1 SV=1	39237	97534	231010	13890000	0.769935	2.15355	1.46174	0.245574
_KLS(ph)FADYR_2	P36124	>sp|P36124|SET3_YEAST SET domain-containing protein 3 OS=Saccharomyces cerevisiae (strain ATCC 204508 / S288c) GN=SET3 PE=1 SV=1	23390	82338	691220	2322500	1.47059	1.45036	1.46047	0.157777
_YASSSS(ph)T(ph)DIENDDEKVSSESR_3	P39009	>sp|P39009|DUN1_YEAST DNA damage response protein kinase DUN1 OS=Saccharomyces cerevisiae (strain ATCC 204508 / S288c) GN=DUN1 PE=1 SV=1	48782	101690	285420	14337000	0.767225	2.14918	1.4582	0.244709
_S(ph)AQEAYER_2	REV__Q12368	>sp|Q12368|SNU23_YEAST 23 kDa U4/U6.U5 small nuclear ribonucleoprotein component OS=Saccharomyces cerevisiae (strain ATCC 204508 / S288c) GN=SNU23 PE=1 SV=1	25623	77635	654130	2482100	1.40703	1.50476	1.4559	0.168617
_QSS(ph)TVSSTGSK_2	P17555	>sp|P17555|CAP_YEAST Adenylyl cyclase-associated protein OS=Saccharomyces cerevisiae (strain ATCC 204508 / S288c) GN=SRV2 PE=1 SV=1	143330	402410	2815400	16653000	1.2932	1.61682	1.45501	0.198125
_AGLLKPARS(ph)S(ph)VNSK_3	P47019	>sp|P47019|ALB1_YEAST Ribosome biogenesis protein ALB1 OS=Saccharomyces cerevisiae (strain ATCC 204508 / S288c) GN=ALB1 PE=1 SV=1	41480	94906	1077300	2937600	1.4145	1.4907	1.4526	0.138774
_DVHFIKEES(ph)QNEINLEK_3	Q04418	>sp|Q04418|RBA50_YEAST RNA polymerase II-associated protein RBA50 OS=Saccharomyces cerevisiae (strain ATCC 204508 / S288c) GN=RBA50 PE=1 SV=2	53778	205280	1822400	4687900	1.53004	1.35863	1.44434	0.130379
_MSS(ph)FGTVGK_2	P36146	>sp|P36146|LAS1_YEAST Protein LAS1 OS=Saccharomyces cerevisiae (strain ATCC 204508 / S288c) GN=LAS1 PE=1 SV=1	25604	33077	620060	981000	1.38413	1.47214	1.42813	0.0717088
_DS(ph)SKEGNNLFGEFLEDDDDDKK_3	P19880	>sp|P19880|YAP1_YEAST AP-1-like transcription factor YAP1 OS=Saccharomyces cerevisiae (strain ATCC 204508 / S288c) GN=YAP1 PE=1 SV=2	108560	219930	2580700	6615600	1.37607	1.47828	1.42718	0.132593
_AGHQT(ph)SAESWGTGR_3	P10664;P49626	>sp|P10664|RL4A_YEAST 60S ribosomal protein L4-A OS=Saccharomyces cerevisiae (strain ATCC 204508 / S288c) GN=RPL4A PE=1 SV=4;>sp|P49626|RL4B_YEAST 60S ribosomal protein L4-B OS=Saccharomyces cerevisiae (strain ATCC 204508 / S288c) GN=RPL4B PE=1 SV=2	53202	67180	1659200	1478300	1.49397	1.34252	1.41825	0.0205314
_KENS(ph)TIQSSS(ph)SSNLR_2	P32644	>sp|P32644|ECM32_YEAST Putative ATP-dependent RNA helicase ECM32 OS=Saccharomyces cerevisiae (strain ATCC 204508 / S288c) GN=ECM32 PE=1 SV=1	17094	45465	464590	1130100	1.43423	1.39544	1.41483	0.125445
_TDAQAPTTGFS(ph)FGSQLGGNK_3	P14907	>sp|P14907|NSP1_YEAST Nucleoporin NSP1 OS=Saccharomyces cerevisiae (strain ATCC 204508 / S288c) GN=NSP1 PE=1 SV=1	31571	126280	978790	2650100	1.4914	1.32193	1.40666	0.135713
_CCIGFVGGS(ph)DLSK_2	P07283	>sp|P07283|PMM_YEAST Phosphomannomutase OS=Saccharomyces cerevisiae (strain ATCC 204508 / S288c) GN=SEC53 PE=1 SV=1	121770	147020	2248500	5071600	1.26635	1.53777	1.40206	0.120236
_KLAS(ph)NLDEEK_2	P06105	>sp|P06105|SC160_YEAST Protein SCP160 OS=Saccharomyces cerevisiae (strain ATCC 204508 / S288c) GN=SCP160 PE=1 SV=3	68848	156930	1470800	4612500	1.32966	1.46823	1.39895	0.152965
_QES(ph)NAPINK_2	P23293	>sp|P23293|BUR1_YEAST Serine/threonine-protein kinase BUR1 OS=Saccharomyces cerevisiae (strain ATCC 204508 / S288c) GN=SGV1 PE=1 SV=1	26941	54536	557700	1614200	1.31599	1.47127	1.39363	0.145591
_QVS(ph)ELQDLVK_2	P35719	>sp|P35719|MRP8_YEAST Uncharacterized protein MRP8 OS=Saccharomyces cerevisiae (strain ATCC 204508 / S288c) GN=MRP8 PE=1 SV=1	177020	367460	4505500	8745700	1.40572	1.37658	1.39115	0.0982089
_VES(ph)NGDTNNMFSSPAGLALPK_3	P50105	>sp|P50105|TAF4_YEAST Transcription initiation factor TFIID subunit 4 OS=Saccharomyces cerevisiae (strain ATCC 204508 / S288c) GN=TAF4 PE=1 SV=1	21510	68661	760460	1136100	1.54844	1.21871	1.38357	0.0572585
_IS(ph)QGDFNDK_2	Q03833	>sp|Q03833|GIS1_YEAST Transcriptional activator/repressor GIS1 OS=Saccharomyces cerevisiae (strain ATCC 204508 / S288c) GN=GIS1 PE=1 SV=1	136520	160570	1866400	6817100	1.13581	1.62794	1.38187	0.169069
_NQHS(ph)FVFNESNK_3	P36060	>sp|P36060|MCR1_YEAST NADH-cytochrome b5 reductase 2 OS=Saccharomyces cerevisiae (strain ATCC 204508 / S288c) GN=MCR1 PE=1 SV=1	56349	112470	1043600	3291500	1.26765	1.46636	1.367	0.154154
_KENS(ph)TIQSSSSSNLR_2	P32644	>sp|P32644|ECM32_YEAST Putative ATP-dependent RNA helicase ECM32 OS=Saccharomyces cerevisiae (strain ATCC 204508 / S288c) GN=ECM32 PE=1 SV=1	26621	111390	569300	2819600	1.33012	1.40334	1.36673	0.18705
_NGS(ph)NLAPLLNAPDLTDHQLEIK_3	P21192	>sp|P21192|ACE2_YEAST Metallothionein expression activator OS=Saccharomyces cerevisiae (strain ATCC 204508 / S288c) GN=ACE2 PE=1 SV=1	19520	51939	557950	978350	1.45612	1.275	1.36556	0.0824158
_HS(ph)DS(ph)YSENETNHTNVPISSTGGTNNK_4	Q03612;P0C2I7;P0C2I5;Q12414;P0C2I3;Q12273;P47098;Q03434;Q07793;Q04670;Q92393;O13527	>sp|Q03612|YE11B_YEAST Transposon Ty1-ER1 Gag-Pol polyprotein OS=Saccharomyces cerevisiae (strain ATCC 204508 / S288c) GN=TY1B-ER1 PE=3 SV=1;>sp|P0C2I7|YL14B_YEAST Transposon Ty1-LR4 Gag-Pol polyprotein OS=Saccharomyces cerevisiae (strain ATCC 204508 / S28	82628	3140500	9912500	14036000	2.07906	0.650245	1.36465	0.016352
_RTS(ph)S(ph)GPSASHR_3	P39113	>sp|P39113|CAT8_YEAST Regulatory protein CAT8 OS=Saccharomyces cerevisiae (strain ATCC 204508 / S288c) GN=CAT8 PE=1 SV=2	71644	155160	1248300	4757900	1.24114	1.48664	1.36389	0.170333
_QLS(ph)QIGK_2	Q06704	>sp|Q06704|IMH1_YEAST Golgin IMH1 OS=Saccharomyces cerevisiae (strain ATCC 204508 / S288c) GN=IMH1 PE=1 SV=1	77572	199020	1780300	4471400	1.36079	1.35155	1.35617	0.129281
_S(ph)FANQPLEVVYSK_2	Q01560	>sp|Q01560|NOP3_YEAST Nucleolar protein 3 OS=Saccharomyces cerevisiae (strain ATCC 204508 / S288c) GN=NPL3 PE=1 SV=1	36969	99221	891760	2102900	1.38241	1.32622	1.35431	0.121647
_ELS(ph)EVASR_2	P48415	>sp|P48415|SEC16_YEAST COPII coat assembly protein SEC16 OS=Saccharomyces cerevisiae (strain ATCC 204508 / S288c) GN=SEC16 PE=1 SV=2	152240	305450	2750600	8614000	1.2569	1.45026	1.35358	0.153521
_QMATSNSVAPQQES(ph)FGIHSQNLPR_3	Q00772	>sp|Q00772|SLT2_YEAST Mitogen-activated protein kinase SLT2/MPK1 OS=Saccharomyces cerevisiae (strain ATCC 204508 / S288c) GN=SLT2 PE=1 SV=2	120920	217730	2341200	5519600	1.28694	1.40399	1.34546	0.123763
_SSNITISNAVGRLS(ph)S(ph)EEIEK_3	P11484;P40150	>sp|P11484|HSP75_YEAST Heat shock protein SSB1 OS=Saccharomyces cerevisiae (strain ATCC 204508 / S288c) GN=SSB1 PE=1 SV=3;>sp|P40150|HSP76_YEAST Heat shock protein SSB2 OS=Saccharomyces cerevisiae (strain ATCC 204508 / S288c) GN=SSB2 PE=1 SV=2	41176	42015	564820	1500800	1.13727	1.55292	1.34509	0.1403
_NNLS(ph)FNNK_2	P39113	>sp|P39113|CAT8_YEAST Regulatory protein CAT8 OS=Saccharomyces cerevisiae (strain ATCC 204508 / S288c) GN=CAT8 PE=1 SV=2	33774	69299	589060	1927200	1.24158	1.4442	1.34289	0.157554
_LS(ph)MLNIR_2	P53044	>sp|P53044|UFD1_YEAST Ubiquitin fusion degradation protein 1 OS=Saccharomyces cerevisiae (strain ATCC 204508 / S288c) GN=UFD1 PE=1 SV=1	23024	36904	588370	695160	1.40747	1.27501	1.34124	0.0241235
_NTAS(ph)FAGSK_1	P27476	>sp|P27476|NSR1_YEAST Nuclear localization sequence-binding protein OS=Saccharomyces cerevisiae (strain ATCC 204508 / S288c) GN=NSR1 PE=1 SV=1	55886	318230	1415700	6024400	1.40367	1.27717	1.34042	0.175534
_NS(ph)FSLAK_2	P40467	>sp|P40467|ASG1_YEAST Activator of stress genes 1 OS=Saccharomyces cerevisiae (strain ATCC 204508 / S288c) GN=ASG1 PE=1 SV=1	24380	74340	540390	1592800	1.34567	1.33094	1.33831	0.145728
_QS(ph)FVSQQR_2	P42846	>sp|P42846|KRI1_YEAST Protein KRI1 OS=Saccharomyces cerevisiae (strain ATCC 204508 / S288c) GN=KRI1 PE=1 SV=1	39404	173800	885280	3483300	1.35154	1.30194	1.32674	0.170348
_IPHS(ph)VSDTSAAATTTSTMNNSALSR_3	P40535	>sp|P40535|ACA2_YEAST ATF/CREB activator 2 OS=Saccharomyces cerevisiae (strain ATCC 204508 / S288c) GN=CST6 PE=1 SV=1	59322	164390	1576800	2728200	1.42456	1.22	1.32228	0.0798855
_QTS(ph)EGLGQHPVGR_2	P33202	>sp|P33202|UFD4_YEAST Ubiquitin fusion degradation protein 4 OS=Saccharomyces cerevisiae (strain ATCC 204508 / S288c) GN=UFD4 PE=1 SV=1	75638	111530	976780	3677500	1.11106	1.51816	1.31461	0.171211
_T(ph)HSTYAFESNTNSVAASQM(ox)R_3	P32861	>sp|P32861|UGPA1_YEAST UTP--glucose-1-phosphate uridylyltransferase OS=Saccharomyces cerevisiae (strain ATCC 204508 / S288c) GN=UGP1 PE=1 SV=1	539130	154870	1674200	21037000	0.492114	2.13302	1.31257	0.232715
_ETSNEASS(ph)T(ph)NSENVNK_2	P32386	>sp|P32386|YBT1_YEAST ATP-dependent bile acid permease OS=Saccharomyces cerevisiae (strain ATCC 204508 / S288c) GN=YBT1 PE=1 SV=2	1357600	67075	2533300	15115000	0.270915	2.35285	1.31188	0.225181
_KNDS(ph)TGYPR_2	P53550	>sp|P53550|DCP2_YEAST mRNA-decapping enzyme subunit 2 OS=Saccharomyces cerevisiae (strain ATCC 204508 / S288c) GN=DCP2 PE=1 SV=1	126200	363690	2376900	8066700	1.27495	1.34596	1.31046	0.159514
_S(ph)RGSDLQYLGEFSGK_3	Q12149	>sp|Q12149|RRP6_YEAST Exosome complex exonuclease RRP6 OS=Saccharomyces cerevisiae (strain ATCC 204508 / S288c) GN=RRP6 PE=1 SV=1	64856	142670	1184400	3212300	1.26155	1.35248	1.30702	0.138679
_(ac)MNSLANNNKLS(ph)TEDEEIHSAR_3	P17106	>sp|P17106|CBF1_YEAST Centromere-binding protein 1 OS=Saccharomyces cerevisiae (strain ATCC 204508 / S288c) GN=CBF1 PE=1 SV=2	51379	90337	1070100	1750300	1.31864	1.28725	1.30294	0.0747918
_SSQGQS(ph)FSSSS(ph)QK_2	REV__CON__P08779	>P08779 SWISS-PROT:P08779 Tax_Id=9606 Gene_Symbol=KRT16 Keratin, type I cytoskeletal 16	28423	83166	947130	999890	1.52274	1.08001	1.30137	0.000343902
_(ac)SIENLKS(ph)FDPFADTGDDETATSNYIHIR_3	P32911	>sp|P32911|SUI1_YEAST Eukaryotic translation initiation factor eIF-1 OS=Saccharomyces cerevisiae (strain ATCC 204508 / S288c) GN=SUI1 PE=1 SV=1	154130	338880	2292700	9058600	1.17246	1.42702	1.29974	0.173443
_VTQQVS(ph)ELK_2	Q12109	>sp|Q12109|SYWC_YEAST Tryptophan--tRNA ligase, cytoplasmic OS=Saccharomyces cerevisiae (strain ATCC 204508 / S288c) GN=WRS1 PE=1 SV=1	39148	133940	787400	2567800	1.30349	1.28265	1.29307	0.15506
_KKVS(ph)QES(ph)LHSQPK_3	Q04279	>sp|Q04279|YMX6_YEAST Uncharacterized protein YMR086W OS=Saccharomyces cerevisiae (strain ATCC 204508 / S288c) GN=YMR086W PE=1 SV=1	13919	6139400	2249800	14016000	2.20854	0.358498	1.28352	0.161959
_GS(ph)YVGIHSTGFK_3	Q07478	>sp|Q07478|SUB2_YEAST ATP-dependent RNA helicase SUB2 OS=Saccharomyces cerevisiae (strain ATCC 204508 / S288c) GN=SUB2 PE=1 SV=1	151460	290650	2340600	6931100	1.18903	1.37743	1.28323	0.148635
_KTS(ph)TSVDGK_2	P02294	>sp|P02294|H2B2_YEAST Histone H2B.2 OS=Saccharomyces cerevisiae (strain ATCC 204508 / S288c) GN=HTB2 PE=1 SV=2	156290	1391300	4502300	17793000	1.4595	1.10683	1.28317	0.167551
_SSS(ph)SIYK_2	P21538	>sp|P21538|REB1_YEAST DNA-binding protein REB1 OS=Saccharomyces cerevisiae (strain ATCC 204508 / S288c) GN=REB1 PE=1 SV=2	156640	24124	1218100	1141200	0.89078	1.67491	1.28285	0.00812439
_S(ph)FGLGPK_2	P14742	>sp|P14742|GFA1_YEAST Glutamine--fructose-6-phosphate aminotransferase [isomerizing] OS=Saccharomyces cerevisiae (strain ATCC 204508 / S288c) GN=GFA1 PE=1 SV=4	21158	77429	427240	1394000	1.3052	1.25536	1.28028	0.154768
_SVETS(ph)NGGVEETMK_2	Q03862	>sp|Q03862|ARX1_YEAST Probable metalloprotease ARX1 OS=Saccharomyces cerevisiae (strain ATCC 204508 / S288c) GN=ARX1 PE=1 SV=1	46210	53855	691720	1304300	1.17519	1.38415	1.27967	0.0983118
_TEPDKPAFSFNS(ph)SVGNK_3	P14907	>sp|P14907|NSP1_YEAST Nucleoporin NSP1 OS=Saccharomyces cerevisiae (strain ATCC 204508 / S288c) GN=NSP1 PE=1 SV=1	36964	74527	436930	2276300	1.07263	1.48492	1.27877	0.192801
_VES(ph)NGDTNNMFSSPAGLALPK_2	P50105	>sp|P50105|TAF4_YEAST Transcription initiation factor TFIID subunit 4 OS=Saccharomyces cerevisiae (strain ATCC 204508 / S288c) GN=TAF4 PE=1 SV=1	41468	68767	847010	1201600	1.31018	1.24238	1.27628	0.0532438
_LDS(ph)YKVIEQPITSETAMK_3	P04456	>sp|P04456|RL25_YEAST 60S ribosomal protein L25 OS=Saccharomyces cerevisiae (strain ATCC 204508 / S288c) GN=RPL25 PE=1 SV=4	39172	51074	901520	784530	1.362	1.18641	1.2742	0.025654
_AEVS(ph)DVGNAILDGADCVMLSGETAK_3	P00549	>sp|P00549|KPYK1_YEAST Pyruvate kinase 1 OS=Saccharomyces cerevisiae (strain ATCC 204508 / S288c) GN=CDC19 PE=1 SV=2	67471	94549	1132500	1972600	1.22492	1.31938	1.27215	0.085793
_SRGS(ph)DLQYLGEFSGK_2	Q12149	>sp|Q12149|RRP6_YEAST Exosome complex exonuclease RRP6 OS=Saccharomyces cerevisiae (strain ATCC 204508 / S288c) GN=RRP6 PE=1 SV=1	51054	114170	981980	2070800	1.28407	1.25859	1.27133	0.108643
_S(ph)LDDNSTSLEK_2	P14907	>sp|P14907|NSP1_YEAST Nucleoporin NSP1 OS=Saccharomyces cerevisiae (strain ATCC 204508 / S288c) GN=NSP1 PE=1 SV=1	27936	70502	452750	1517500	1.20969	1.33293	1.27131	0.159104
_NAVSTKPTPPPAPEASAESGLS(ph)S(ph)KVHSYTDLAYR_4	P16862	>sp|P16862|PFKA2_YEAST ATP-dependent 6-phosphofructokinase subunit beta OS=Saccharomyces cerevisiae (strain ATCC 204508 / S288c) GN=PFK2 PE=1 SV=4	8389100	12717000	105540000	349470000	1.0997	1.43903	1.26936	0.160597
_ERS(ph)QSEREEEWLEK_3	P40007	>sp|P40007|NOP16_YEAST Nucleolar protein 16 OS=Saccharomyces cerevisiae (strain ATCC 204508 / S288c) GN=NOP16 PE=1 SV=1	150200	610260	6507200	4800400	1.63672	0.895763	1.26624	0.0644978
_QNLST(ph)INTGTK_2	P40010	>sp|P40010|NUG1_YEAST Nuclear GTP-binding protein NUG1 OS=Saccharomyces cerevisiae (strain ATCC 204508 / S288c) GN=NUG1 PE=1 SV=1	24932	60152	624580	813490	1.39883	1.1311	1.26497	0.0360035
_FLGS(ph)S(ph)FNIDK_2	Q12263	>sp|Q12263|GIN4_YEAST Serine/threonine-protein kinase GIN4 OS=Saccharomyces cerevisiae (strain ATCC 204508 / S288c) GN=GIN4 PE=1 SV=1	39691	112370	875590	1720500	1.34361	1.185	1.26431	0.0974155
_TSS(ph)ITS(ph)SKK_2	Q05050	>sp|Q05050|EIS1_YEAST Eisosome protein 1 OS=Saccharomyces cerevisiae (strain ATCC 204508 / S288c) GN=EIS1 PE=1 SV=1	135940	214420	1136000	8569500	0.922031	1.60169	1.26186	0.21208
_AGHQTS(ph)AESWGTGR_2	P10664;P49626	>sp|P10664|RL4A_YEAST 60S ribosomal protein L4-A OS=Saccharomyces cerevisiae (strain ATCC 204508 / S288c) GN=RPL4A PE=1 SV=4;>sp|P49626|RL4B_YEAST 60S ribosomal protein L4-B OS=Saccharomyces cerevisiae (strain ATCC 204508 / S288c) GN=RPL4B PE=1 SV=2	41852	53166	553750	1335700	1.1216	1.40007	1.26084	0.12912
_FVPVEHS(ph)PR_3	Q04383	>sp|Q04383|PLM2_YEAST Protein PLM2 OS=Saccharomyces cerevisiae (strain ATCC 204508 / S288c) GN=PLM2 PE=1 SV=1	16171	24680	191230	684810	1.07282	1.44322	1.25802	0.167487
_AAEAGETGAATSATEGDNNNNTAAGDKKGSYVGIHS(ph)TGFK_4	Q07478	>sp|Q07478|SUB2_YEAST ATP-dependent RNA helicase SUB2 OS=Saccharomyces cerevisiae (strain ATCC 204508 / S288c) GN=SUB2 PE=1 SV=1	294160	271880	3315100	7835800	1.05191	1.45971	1.25581	0.129049
_S(ph)INVDQIVR_2	P32783	>sp|P32783|MCES_YEAST mRNA cap guanine-N7 methyltransferase OS=Saccharomyces cerevisiae (strain ATCC 204508 / S288c) GN=ABD1 PE=1 SV=1	19057	35033	297530	720740	1.19348	1.3133	1.25339	0.127208
_HGDYS(ph)FNGR_2	P38345	>sp|P38345|FMP21_YEAST Protein FMP21, mitochondrial OS=Saccharomyces cerevisiae (strain ATCC 204508 / S288c) GN=FMP21 PE=1 SV=2	117870	414420	2185500	7152200	1.26815	1.237	1.25257	0.155224
_LGGFS(ph)GQGQR_2	P34223	>sp|P34223|UBX1_YEAST UBX domain-containing protein 1 OS=Saccharomyces cerevisiae (strain ATCC 204508 / S288c) GN=SHP1 PE=1 SV=1	22118	38916	265020	1034700	1.07853	1.42469	1.25161	0.173842
_NDS(ph)TGYPR_2	P53550	>sp|P53550|DCP2_YEAST mRNA-decapping enzyme subunit 2 OS=Saccharomyces cerevisiae (strain ATCC 204508 / S288c) GN=DCP2 PE=1 SV=1	13493	50009	280400	759000	1.31767	1.18119	1.24943	0.135392
_(ac)SQDAAIAEQTPVEHLS(ph)AVDSASHSVLSTPS(ph)NKAERDEIK_4	P39004;P39003	>sp|P39004|HXT7_YEAST High-affinity hexose transporter HXT6 OS=Saccharomyces cerevisiae (strain ATCC 204508 / S288c) GN=HXT7 PE=1 SV=1;>sp|P39003|HXT6_YEAST High-affinity hexose transporter HXT6 OS=Saccharomyces cerevisiae (strain ATCC 204508 / S288c) GN=H	5871900	2076500	29095000	129560000	0.69504	1.79514	1.24509	0.192644
_VKS(ph)DMLK_2	P09938	>sp|P09938|RIR2_YEAST Ribonucleoside-diphosphate reductase small chain 1 OS=Saccharomyces cerevisiae (strain ATCC 204508 / S288c) GN=RNR2 PE=1 SV=2	316000	523410	5126100	9766900	1.2101	1.27091	1.24051	0.0972698
_KQFNETDNQNS(ph)LKR_3	P11747	>sp|P11747|TAF13_YEAST Transcription initiation factor TFIID subunit 13 OS=Saccharomyces cerevisiae (strain ATCC 204508 / S288c) GN=TAF13 PE=1 SV=2	26489	43320	362920	952470	1.13675	1.34216	1.23945	0.137183
_SSS(ph)ELEKESSESEAVK_3	P38779	>sp|P38779|CIC1_YEAST Proteasome-interacting protein CIC1 OS=Saccharomyces cerevisiae (strain ATCC 204508 / S288c) GN=CIC1 PE=1 SV=1	135140	240780	1738200	5314500	1.10932	1.34384	1.22658	0.152588
_KFSVSSNDS(ph)QNS(ph)LKNGDPHVK_3	Q06833	>sp|Q06833|YP091_YEAST Uncharacterized PH domain-containing protein YPR091C OS=Saccharomyces cerevisiae (strain ATCC 204508 / S288c) GN=YPR091C PE=1 SV=1	70971	82290	803470	2053100	1.05389	1.39706	1.22548	0.136729
_KS(ph)SKEEEEEFLNSDSSK_3	P07866	>sp|P07866|LTE1_YEAST Guanine nucleotide exchange factor LTE1 OS=Saccharomyces cerevisiae (strain ATCC 204508 / S288c) GN=LTE1 PE=1 SV=2	55534	138000	874330	2424300	1.19712	1.24471	1.22091	0.140533
_NKS(ph)INSES(ph)FSSPSLR_3	Q06146	>sp|Q06146|YL257_YEAST Uncharacterized protein YLR257W OS=Saccharomyces cerevisiae (strain ATCC 204508 / S288c) GN=YLR257W PE=1 SV=1	65823	134500	801290	3040200	1.08541	1.35418	1.2198	0.171089
_KAS(ph)S(ph)PTVKPASSK_3	P38630	>sp|P38630|RFC1_YEAST Replication factor C subunit 1 OS=Saccharomyces cerevisiae (strain ATCC 204508 / S288c) GN=RFC1 PE=1 SV=1	464970	1525800	8791600	21420000	1.27664	1.14732	1.21198	0.123825
_NFNGNAEDSST(ph)AGNTTHTEYQK_3	P35197	>sp|P35197|GCS1_YEAST ADP-ribosylation factor GTPase-activating protein GCS1 OS=Saccharomyces cerevisiae (strain ATCC 204508 / S288c) GN=GCS1 PE=1 SV=1	26282	40212	245890	1135700	0.971082	1.45091	1.211	0.187024
_(ac)S(ph)FTEDQEK_2	P48353	>sp|P48353|HLJ1_YEAST Protein HLJ1 OS=Saccharomyces cerevisiae (strain ATCC 204508 / S288c) GN=HLJ1 PE=1 SV=1	39980	110040	680420	1702800	1.23093	1.18961	1.21027	0.128307
_KKS(ph)VMDSAK_3	Q06505	>sp|Q06505|IWS1_YEAST Transcription factor SPN1 OS=Saccharomyces cerevisiae (strain ATCC 204508 / S288c) GN=SPN1 PE=1 SV=1	52553	110900	1285400	1181500	1.38844	1.0275	1.20797	0.0223837
_TQS(ph)KLEALQK_2	P38286	>sp|P38286|MKAR_YEAST Very-long-chain 3-oxoacyl-CoA reductase OS=Saccharomyces cerevisiae (strain ATCC 204508 / S288c) GN=IFA38 PE=1 SV=1	32905	62891	369520	1455100	1.05038	1.3643	1.20734	0.174487
_YECLQPSGS(ph)FK_2	P25379	>sp|P25379|STDH_YEAST Catabolic L-serine/threonine dehydratase OS=Saccharomyces cerevisiae (strain ATCC 204508 / S288c) GN=CHA1 PE=1 SV=2	188550	665580	2911800	11141000	1.18874	1.22372	1.20623	0.169042
_SSVYDSNS(ph)FNNGASR_2	P39104	>sp|P39104|PIK1_YEAST Phosphatidylinositol 4-kinase PIK1 OS=Saccharomyces cerevisiae (strain ATCC 204508 / S288c) GN=PIK1 PE=1 SV=1	70369	123190	895450	2482000	1.10466	1.30423	1.20444	0.142893
_(ac)S(ph)DYEEAFNDGNENFEDFDVEHFS(ph)DEETYEEKPQFK_4	P20435	>sp|P20435|RPAB2_YEAST DNA-directed RNA polymerases I, II, and III subunit RPABC2 OS=Saccharomyces cerevisiae (strain ATCC 204508 / S288c) GN=RPO26 PE=1 SV=1	870470	980280	8338900	25727000	0.981355	1.41904	1.2002	0.156703
_TTS(ph)NPSSILHDLPR_3	P47035	>sp|P47035|NET1_YEAST Nucleolar protein NET1 OS=Saccharomyces cerevisiae (strain ATCC 204508 / S288c) GN=NET1 PE=1 SV=1	93972	203520	1498800	3200900	1.20275	1.19667	1.19971	0.11049
_ATS(ph)SVAPPR_2	P48415	>sp|P48415|SEC16_YEAST COPII coat assembly protein SEC16 OS=Saccharomyces cerevisiae (strain ATCC 204508 / S288c) GN=SEC16 PE=1 SV=2	29557	140200	491610	2110400	1.22096	1.17762	1.19929	0.176675
_S(ph)SSELEKESSESEAVK_2	P38779	>sp|P38779|CIC1_YEAST Proteasome-interacting protein CIC1 OS=Saccharomyces cerevisiae (strain ATCC 204508 / S288c) GN=CIC1 PE=1 SV=1	135370	234010	1515900	5184300	1.04915	1.34546	1.1973	0.16343
_DIS(ph)LHS(ph)LK_2	P47035	>sp|P47035|NET1_YEAST Nucleolar protein NET1 OS=Saccharomyces cerevisiae (strain ATCC 204508 / S288c) GN=NET1 PE=1 SV=1	39697	146480	692380	2073800	1.24159	1.15099	1.19629	0.146064
_NATDTS(ph)FVSK_2	P38803	>sp|P38803|IPI1_YEAST Pre-rRNA-processing protein IPI1 OS=Saccharomyces cerevisiae (strain ATCC 204508 / S288c) GN=IPI1 PE=1 SV=1	26021	92999	399130	1482000	1.18579	1.20237	1.19408	0.166468
_ASIAS(ph)SFRK_3	Q12230	>sp|Q12230|LSP1_YEAST Sphingolipid long chain base-responsive protein LSP1 OS=Saccharomyces cerevisiae (strain ATCC 204508 / S288c) GN=LSP1 PE=1 SV=1	86454	115870	877150	2747600	1.00629	1.37498	1.19064	0.157096
_S(ph)QSEREEEWLEK_3	P40007	>sp|P40007|NOP16_YEAST Nucleolar protein 16 OS=Saccharomyces cerevisiae (strain ATCC 204508 / S288c) GN=NOP16 PE=1 SV=1	82974	320070	3295500	1907300	1.59898	0.775174	1.18708	0.103929
_GPS(ph)S(ph)ITDFLNLK_2	P36041	>sp|P36041|EAP1_YEAST Protein EAP1 OS=Saccharomyces cerevisiae (strain ATCC 204508 / S288c) GN=EAP1 PE=1 SV=1	123550	281840	2104100	3899100	1.23122	1.14096	1.18609	0.0905449
_SKPVALTS(ph)FLGYK_2	P14126	>sp|P14126|RL3_YEAST 60S ribosomal protein L3 OS=Saccharomyces cerevisiae (strain ATCC 204508 / S288c) GN=RPL3 PE=1 SV=4	100480	244360	1428700	4047900	1.15286	1.2192	1.18603	0.143058
_DIS(ph)LHS(ph)LKGSVVPVK_3	P47035	>sp|P47035|NET1_YEAST Nucleolar protein NET1 OS=Saccharomyces cerevisiae (strain ATCC 204508 / S288c) GN=NET1 PE=1 SV=1	37333	54346	487030	968810	1.11546	1.25107	1.18327	0.104522
_VEGGS(ph)VR_2	REV__Q02785;REV__P51533;REV__Q04182;REV__P33302;REV__P32568	>sp|Q02785|PDR12_YEAST ATP-dependent permease PDR12 OS=Saccharomyces cerevisiae (strain ATCC 204508 / S288c) GN=PDR12 PE=1 SV=1;>sp|P51533|PDR10_YEAST ATP-dependent permease PDR10 OS=Saccharomyces cerevisiae (strain ATCC 204508 / S288c) GN=PDR10 PE=3 SV=1;	87895	581960	2210200	5350100	1.40047	0.963469	1.18197	0.116701
_QVAATAS(ph)EKSDIGDSK_2	P40154	>sp|P40154|IES2_YEAST Ino eighty subunit 2 OS=Saccharomyces cerevisiae (strain ATCC 204508 / S288c) GN=IES2 PE=1 SV=1	18134	43751	216130	845260	1.07622	1.286	1.18111	0.172912
_DMGDVGS(ph)TTSFKEEEKPK_3	P43597	>sp|P43597|YFI6_YEAST Uncharacterized protein YFR016C OS=Saccharomyces cerevisiae (strain ATCC 204508 / S288c) GN=YFR016C PE=1 SV=1	54108	171000	893130	2368700	1.21765	1.14151	1.17958	0.133914
_TYSELS(ph)CL_2	P39009	>sp|P39009|DUN1_YEAST DNA damage response protein kinase DUN1 OS=Saccharomyces cerevisiae (strain ATCC 204508 / S288c) GN=DUN1 PE=1 SV=1	48555	191940	989640	2147100	1.30924	1.04869	1.17897	0.107205
_TNSFVGT(ph)EEYLAPEVIR_3	P25341	>sp|P25341|KIN82_YEAST Serine/threonine-protein kinase KIN82 OS=Saccharomyces cerevisiae (strain ATCC 204508 / S288c) GN=KIN82 PE=1 SV=3	63656	135490	1062700	1836600	1.22257	1.13211	1.17734	0.0809707
_TS(ph)SSMS(ph)VGNNKK_2	P38426	>sp|P38426|TPS3_YEAST Trehalose synthase complex regulatory subunit TPS3 OS=Saccharomyces cerevisiae (strain ATCC 204508 / S288c) GN=TPS3 PE=1 SV=3	104890	185970	329480	13348000	0.497095	1.85597	1.17653	0.244569
_NLQHEKS(ph)DLISR_3	P25386	>sp|P25386|USO1_YEAST Intracellular protein transport protein USO1 OS=Saccharomyces cerevisiae (strain ATCC 204508 / S288c) GN=USO1 PE=1 SV=2	114810	241650	1267200	4911000	1.04287	1.30798	1.17542	0.172981
_IS(ph)DGTSGESSLVK_2	P53920	>sp|P53920|NM111_YEAST Pro-apoptotic serine protease NMA111 OS=Saccharomyces cerevisiae (strain ATCC 204508 / S288c) GN=NMA111 PE=1 SV=1	171090	457920	2847500	6160300	1.22124	1.12881	1.17503	0.110317
_VVS(ph)FNSK_2	Q07657	>sp|Q07657|SHS1_YEAST Seventh homolog of septin 1 OS=Saccharomyces cerevisiae (strain ATCC 204508 / S288c) GN=SHS1 PE=1 SV=1	46567	116960	605340	1958200	1.11392	1.22382	1.16887	0.156212
_FLGS(ph)S(ph)FNIDKELK_2	Q12263	>sp|Q12263|GIN4_YEAST Serine/threonine-protein kinase GIN4 OS=Saccharomyces cerevisiae (strain ATCC 204508 / S288c) GN=GIN4 PE=1 SV=1	209540	231430	2395500	4401300	1.05813	1.27916	1.16865	0.0963069
_ALPS(ph)ITDIPVSDDSDIKR_3	P46676	>sp|P46676|SUM1_YEAST Suppressor of mar1-1 protein OS=Saccharomyces cerevisiae (strain ATCC 204508 / S288c) GN=SUM1 PE=1 SV=2	79620	112860	864850	2253200	1.03592	1.30026	1.16809	0.138074
_SNS(ph)ANVSSPESEK_2	P53125	>sp|P53125|ITC1_YEAST Imitation switch two complex protein 1 OS=Saccharomyces cerevisiae (strain ATCC 204508 / S288c) GN=ITC1 PE=1 SV=1	28967	108290	453920	1490700	1.19508	1.1388	1.16694	0.15507
_(ac)M(ox)SLYQS(ph)IVFIAR_3	Q99341	>sp|Q99341|FYV1_YEAST Putative uncharacterized protein FYV1 OS=Saccharomyces cerevisiae (strain ATCC 204508 / S288c) GN=FYV1 PE=5 SV=1	95842	127230	1031700	2520300	1.032	1.29686	1.16443	0.131339
_IS(ph)FQLSK_2	P05755;O13516	>sp|P05755|RS9B_YEAST 40S ribosomal protein S9-B OS=Saccharomyces cerevisiae (strain ATCC 204508 / S288c) GN=RPS9B PE=1 SV=4;>sp|O13516|RS9A_YEAST 40S ribosomal protein S9-A OS=Saccharomyces cerevisiae (strain ATCC 204508 / S288c) GN=RPS9A PE=1 SV=3	30737	71271	380430	1219000	1.09261	1.23309	1.16285	0.155861
_AKS(ph)CGVDAMSVDDLKK_3	P0CX43;P0CX44	>sp|P0CX43|RL1A_YEAST 60S ribosomal protein L1-A OS=Saccharomyces cerevisiae (strain ATCC 204508 / S288c) GN=RPL1A PE=1 SV=1;>sp|P0CX44|RL1B_YEAST 60S ribosomal protein L1-B OS=Saccharomyces cerevisiae (strain ATCC 204508 / S288c) GN=RPL1B PE=1 SV=1	240330	323850	4456700	3682400	1.26821	1.05579	1.162	0.035894
_LNLT(ph)SGHLNAGR_3	Q00055	>sp|Q00055|GPD1_YEAST Glycerol-3-phosphate dehydrogenase [NAD(+)] 1 OS=Saccharomyces cerevisiae (strain ATCC 204508 / S288c) GN=GPD1 PE=1 SV=4	141750	323200	1902200	4992300	1.12773	1.18883	1.15828	0.13523
_SVS(ph)DAELR_2	P25694	>sp|P25694|CDC48_YEAST Cell division control protein 48 OS=Saccharomyces cerevisiae (strain ATCC 204508 / S288c) GN=CDC48 PE=1 SV=3	18629	9152200	4079300	8656800	2.3404	-0.0241681	1.15811	0.288643
_(ac)S(ph)FSTINSNVNK_2	P38889	>sp|P38889|SKN7_YEAST Transcription factor SKN7 OS=Saccharomyces cerevisiae (strain ATCC 204508 / S288c) GN=SKN7 PE=1 SV=1	62449	183130	1051600	2248600	1.22633	1.08915	1.15774	0.107835
_DSEFNS(ph)FLGTTKPPSMTESSLK_3	P15891	>sp|P15891|ABP1_YEAST Actin-binding protein OS=Saccharomyces cerevisiae (strain ATCC 204508 / S288c) GN=ABP1 PE=1 SV=4	219590	535870	4333600	5578800	1.29524	1.01748	1.15636	0.0321807
_S(ph)DSAS(ph)FLEEKEEPQENHDNKEEQS_3	P38199	>sp|P38199|HEK2_YEAST Heterogeneous nuclear rnp K-like protein 2 OS=Saccharomyces cerevisiae (strain ATCC 204508 / S288c) GN=HEK2 PE=1 SV=1	589320	1730000	8410900	24688000	1.15449	1.15444	1.15447	0.145481
_S(ph)SSELEKESSESEAVKK_3	P38779	>sp|P38779|CIC1_YEAST Proteasome-interacting protein CIC1 OS=Saccharomyces cerevisiae (strain ATCC 204508 / S288c) GN=CIC1 PE=1 SV=1	729480	819540	6349500	19036000	0.939726	1.36601	1.15287	0.154746
_AYTSSAQVM(ox)PEVPQHEPS(ph)TTQEFNVDELSNELKK_4	Q04947	>sp|Q04947|RTN1_YEAST Reticulon-like protein 1 OS=Saccharomyces cerevisiae (strain ATCC 204508 / S288c) GN=RTN1 PE=1 SV=1	536600	171360	1392200	13349000	0.414051	1.89154	1.1528	0.229362
_SS(ph)GHFSTDSR_3	Q12018	>sp|Q12018|CDC53_YEAST Cell division control protein 53 OS=Saccharomyces cerevisiae (strain ATCC 204508 / S288c) GN=CDC53 PE=1 SV=1	35435	121320	503630	1710600	1.15268	1.14922	1.15095	0.158807
_MDS(ph)GNDSATSQGFSMTNEQR_3	P53145	>sp|P53145|LSG1_YEAST Large subunit GTPase 1 OS=Saccharomyces cerevisiae (strain ATCC 204508 / S288c) GN=LSG1 PE=1 SV=1	217940	277190	3523600	3387600	1.20865	1.08711	1.14788	0.00968363
_HVLT(ph)SIGEK_2	P06787	>sp|P06787|CALM_YEAST Calmodulin OS=Saccharomyces cerevisiae (strain ATCC 204508 / S288c) GN=CMD1 PE=1 SV=1	73416	202570	547100	5299500	0.872276	1.41766	1.14497	0.220503
_(ac)STEPVSAS(ph)DKYQK_2	P06786	>sp|P06786|TOP2_YEAST DNA topoisomerase 2 OS=Saccharomyces cerevisiae (strain ATCC 204508 / S288c) GN=TOP2 PE=1 SV=2	25580	34077	195950	852690	0.884245	1.39833	1.14129	0.184686
_DNDDTS(ph)VAS(ph)S(ph)IDLDHLSR_3	Q00402	>sp|Q00402|NUM1_YEAST Nuclear migration protein NUM1 OS=Saccharomyces cerevisiae (strain ATCC 204508 / S288c) GN=NUM1 PE=1 SV=2	11852	4221100	1791200	5298600	2.17935	0.0987355	1.13904	0.0766813
_SLS(ph)DGLTHR_2	P14242	>sp|P14242|PMS1_YEAST DNA mismatch repair protein PMS1 OS=Saccharomyces cerevisiae (strain ATCC 204508 / S288c) GN=PMS1 PE=1 SV=3	16445	32330	186340	540660	1.05427	1.22332	1.1388	0.147329
_EHSAYGS(ph)FFK_2	P20447	>sp|P20447|DBP3_YEAST ATP-dependent RNA helicase DBP3 OS=Saccharomyces cerevisiae (strain ATCC 204508 / S288c) GN=DBP3 PE=1 SV=2	68854	214810	1183300	2336900	1.23517	1.03659	1.13588	0.096073
_NIASS(ph)FQSK_2	P51862	>sp|P51862|ROM2_YEAST RHO1 GDP-GTP exchange protein 2 OS=Saccharomyces cerevisiae (strain ATCC 204508 / S288c) GN=ROM2 PE=1 SV=1	33908	89660	436920	1298800	1.1101	1.16094	1.13552	0.147592
_SQNAPSDGTGSST(ph)PQHHDEDEDELSR_3	P38431	>sp|P38431|IF5_YEAST Eukaryotic translation initiation factor 5 OS=Saccharomyces cerevisiae (strain ATCC 204508 / S288c) GN=TIF5 PE=1 SV=1	6250200	67390	4958600	15738000	-0.100535	2.36835	1.13391	0.276177
_LTDHSGEYFTS(ph)NS(ph)TSSLNHHSSR_4	P26570	>sp|P26570|PPZ1_YEAST Serine/threonine-protein phosphatase PP-Z1 OS=Saccharomyces cerevisiae (strain ATCC 204508 / S288c) GN=PPZ1 PE=1 SV=5	585390	47204	1488700	3349300	0.405362	1.85098	1.12817	0.165004
_KNGS(ph)FKDER_3	P23293	>sp|P23293|BUR1_YEAST Serine/threonine-protein kinase BUR1 OS=Saccharomyces cerevisiae (strain ATCC 204508 / S288c) GN=SGV1 PE=1 SV=1	30336	194520	538910	1974800	1.24956	1.00656	1.12806	0.161427
_HGEGS(ph)FR_2	Q12040	>sp|Q12040|YO283_YEAST Broad-specificity phosphatase YOR283W OS=Saccharomyces cerevisiae (strain ATCC 204508 / S288c) GN=YOR283W PE=1 SV=1	150680	893170	3210600	7549800	1.32853	0.927001	1.12777	0.112848
_LSS(ph)VYGAK_2	Q06709	>sp|Q06709|REH1_YEAST Cytoplasmic 60S subunit biogenesis factor REH1 OS=Saccharomyces cerevisiae (strain ATCC 204508 / S288c) GN=REH1 PE=1 SV=1	23974	83219	318630	1123000	1.12355	1.13016	1.12685	0.162101
_(ac)SSGSAGAPALSNNST(ph)NSVAK_2	P41896	>sp|P41896|T2FB_YEAST Transcription initiation factor IIF subunit beta OS=Saccharomyces cerevisiae (strain ATCC 204508 / S288c) GN=TFG2 PE=1 SV=2	30817	88536	539990	895870	1.2436	1.00513	1.12436	0.0708945
_GHVLTPHS(ph)TR_3	Q12502	>sp|Q12502|LDB19_YEAST Protein LDB19 OS=Saccharomyces cerevisiae (strain ATCC 204508 / S288c) GN=LDB19 PE=1 SV=1	28689	208830	533630	1988900	1.26952	0.97882	1.12417	0.162018
_LIS(ph)TEDVTSK_2	P38850	>sp|P38850|RT107_YEAST Regulator of Ty1 transposition protein 107 OS=Saccharomyces cerevisiae (strain ATCC 204508 / S288c) GN=RTT107 PE=1 SV=1	75779	148540	953250	2075700	1.09966	1.14532	1.12249	0.113996
_KPAS(ph)FLNDVEEEES(ph)PVKPLK_3	P23201	>sp|P23201|SPA2_YEAST Protein SPA2 OS=Saccharomyces cerevisiae (strain ATCC 204508 / S288c) GN=SPA2 PE=1 SV=1	210240	580140	2715400	7868700	1.11112	1.13237	1.12174	0.14462
_NTPDAS(ph)KPSFSFGVPNSSK_3	P32499	>sp|P32499|NUP2_YEAST Nucleoporin NUP2 OS=Saccharomyces cerevisiae (strain ATCC 204508 / S288c) GN=NUP2 PE=1 SV=2	27938	161400	480920	1630900	1.23588	1.00452	1.1202	0.154821
_SSNNSNS(ph)FTSTK_2	P35732	>sp|P35732|DEF1_YEAST RNA polymerase II degradation factor 1 OS=Saccharomyces cerevisiae (strain ATCC 204508 / S288c) GN=DEF1 PE=1 SV=1	380610	978990	3709500	17276000	0.988835	1.24666	1.11775	0.185863
_LQKLS(ph)ANNK_2	Q02642	>sp|Q02642|NACB1_YEAST Nascent polypeptide-associated complex subunit beta-1 OS=Saccharomyces cerevisiae (strain ATCC 204508 / S288c) GN=EGD1 PE=1 SV=2	60183	171900	876370	2028600	1.16321	1.07192	1.11757	0.118168
_RKT(ph)SELFPLSGS(ph)ESGDIK_3	P40563	>sp|P40563|AIM21_YEAST Altered inheritance of mitochondria protein 21 OS=Saccharomyces cerevisiae (strain ATCC 204508 / S288c) GN=AIM21 PE=1 SV=1	28167	82828	405000	982170	1.15771	1.07401	1.11586	0.123699
_IDDSS(ph)FSR_2	P46947	>sp|P46947|CWC26_YEAST Pre-mRNA-splicing factor CWC26 OS=Saccharomyces cerevisiae (strain ATCC 204508 / S288c) GN=BUD13 PE=1 SV=1	46053	104590	451340	1807000	0.991246	1.23747	1.11436	0.175606
_LVLS(ph)QGHYK_2	P53718	>sp|P53718|NRM1_YEAST Transcription factor NRM1 OS=Saccharomyces cerevisiae (strain ATCC 204508 / S288c) GN=NRM1 PE=1 SV=1	27081	31006	199330	709920	0.866908	1.35976	1.11334	0.17091
_ALSNNIS(ph)QESLVAPAPEQGVPPAIS(ph)R_3	P38427	>sp|P38427|TSL1_YEAST Trehalose synthase complex regulatory subunit TSL1 OS=Saccharomyces cerevisiae (strain ATCC 204508 / S288c) GN=TSL1 PE=1 SV=1	131270	151070	1189000	2805300	0.957016	1.2688	1.11291	0.129291
_FS(ph)GTVSSDVFK_2	P32499	>sp|P32499|NUP2_YEAST Nucleoporin NUP2 OS=Saccharomyces cerevisiae (strain ATCC 204508 / S288c) GN=NUP2 PE=1 SV=2	96534	130680	822410	2569700	0.930408	1.29367	1.11204	0.157925
_ISLNHS(ph)PK_2	P32328	>sp|P32328|DBF20_YEAST Serine/threonine-protein kinase DBF20 OS=Saccharomyces cerevisiae (strain ATCC 204508 / S288c) GN=DBF20 PE=1 SV=2	164070	2240600	4503900	13565000	1.43856	0.782055	1.11031	0.13351
_SNS(ph)LITSTDPVEDHISK_3	Q06146	>sp|Q06146|YL257_YEAST Uncharacterized protein YLR257W OS=Saccharomyces cerevisiae (strain ATCC 204508 / S288c) GN=YLR257W PE=1 SV=1	450270	725970	4365000	12405000	0.986511	1.23268	1.10959	0.147051
_NTASFAGS(ph)KK_2	P27476	>sp|P27476|NSR1_YEAST Nuclear localization sequence-binding protein OS=Saccharomyces cerevisiae (strain ATCC 204508 / S288c) GN=NSR1 PE=1 SV=1	135730	1471600	3391800	9721400	1.39775	0.819939	1.10885	0.130342
_ATAEPS(ph)DNDILSQMTK_2	P22936	>sp|P22936|APN1_YEAST DNA-(apurinic or apyrimidinic site) lyase 1 OS=Saccharomyces cerevisiae (strain ATCC 204508 / S288c) GN=APN1 PE=1 SV=4	220380	137020	1748200	2844600	0.899419	1.31724	1.10833	0.0864725
_(ac)SSLS(ph)DQLAQVASNNATVALDR_3	P42945	>sp|P42945|UTP10_YEAST U3 small nucleolar RNA-associated protein 10 OS=Saccharomyces cerevisiae (strain ATCC 204508 / S288c) GN=UTP10 PE=1 SV=1	58195	80651	675300	1137000	1.06461	1.14915	1.10688	0.0817061
_QLS(ph)DTNNLNEK_2	P40038	>sp|P40038|PCL6_YEAST PHO85 cyclin-6 OS=Saccharomyces cerevisiae (strain ATCC 204508 / S288c) GN=PCL6 PE=1 SV=1	99438	144170	835910	2763900	0.924607	1.28265	1.10363	0.162767
_EADATPDDDRS(ph)SISSNS(ph)NK_3	P47018	>sp|P47018|MTC1_YEAST Maintenance of telomere capping protein 1 OS=Saccharomyces cerevisiae (strain ATCC 204508 / S288c) GN=MTC1 PE=1 SV=1	24418	5786300	3912100	5787600	2.2047	9.75614e-05	1.1024	0.249894
_SS(ph)FTEIK_2	Q12449	>sp|Q12449|AHA1_YEAST Hsp90 co-chaperone AHA1 OS=Saccharomyces cerevisiae (strain ATCC 204508 / S288c) GN=AHA1 PE=1 SV=1	1898400	4102900	20480000	60455000	1.03294	1.16834	1.10064	0.148614
_TS(ph)S(ph)SMS(ph)VGNNKK_2	P38426	>sp|P38426|TPS3_YEAST Trehalose synthase complex regulatory subunit TPS3 OS=Saccharomyces cerevisiae (strain ATCC 204508 / S288c) GN=TPS3 PE=1 SV=3	88287	146390	1073500	1900500	1.08491	1.11336	1.09913	0.0871046
_AAADALS(ph)DLEIKDS(ph)K_2	P09938	>sp|P09938|RIR2_YEAST Ribonucleoside-diphosphate reductase small chain 1 OS=Saccharomyces cerevisiae (strain ATCC 204508 / S288c) GN=RNR2 PE=1 SV=2	57206	189260	714850	2377600	1.09677	1.09908	1.09793	0.157074
_QVANEAASDVLFGNES(ph)VK_3	Q05022	>sp|Q05022|RRP5_YEAST rRNA biogenesis protein RRP5 OS=Saccharomyces cerevisiae (strain ATCC 204508 / S288c) GN=RRP5 PE=1 SV=1	25104	156660	500950	1221100	1.30005	0.891793	1.09592	0.116186
_GGGS(ph)FFSNNR_2	P06634	>sp|P06634|DED1_YEAST ATP-dependent RNA helicase DED1 OS=Saccharomyces cerevisiae (strain ATCC 204508 / S288c) GN=DED1 PE=1 SV=2	49789	228040	766790	2279400	1.18754	0.99981	1.09368	0.142968
_QS(ph)TNFTHSTGS(ph)FLQSAPVELT(ph)TVSGYQEFLK_4	O43137	>sp|O43137|YB085_YEAST Uncharacterized protein YBR085C-A OS=Saccharomyces cerevisiae (strain ATCC 204508 / S288c) GN=YBR085C-A PE=1 SV=1	22548	400770	555080	2495200	1.39125	0.79421	1.09273	0.170746
_LLDGVADGS(ph)MR_2	Q02892	>sp|Q02892|NOG1_YEAST Nucleolar GTP-binding protein 1 OS=Saccharomyces cerevisiae (strain ATCC 204508 / S288c) GN=NOG1 PE=1 SV=1	49031	66712	612370	816670	1.09654	1.08784	1.09219	0.0449309
_(ac)S(ph)NIVGIEYNR_2	P07703	>sp|P07703|RPAC1_YEAST DNA-directed RNA polymerases I and III subunit RPAC1 OS=Saccharomyces cerevisiae (strain ATCC 204508 / S288c) GN=RPC40 PE=1 SV=1	31730	63210	406310	748050	1.10739	1.07314	1.09027	0.0906839
_SQS(ph)YDQGEISR_2	Q12034	>sp|Q12034|SLF1_YEAST Protein SLF1 OS=Saccharomyces cerevisiae (strain ATCC 204508 / S288c) GN=SLF1 PE=1 SV=1	18566	48930	196190	698390	1.02396	1.15452	1.08924	0.165022
_AVGAHS(ph)DLLK_3	P10664;P49626	>sp|P10664|RL4A_YEAST 60S ribosomal protein L4-A OS=Saccharomyces cerevisiae (strain ATCC 204508 / S288c) GN=RPL4A PE=1 SV=4;>sp|P49626|RL4B_YEAST 60S ribosomal protein L4-B OS=Saccharomyces cerevisiae (strain ATCC 204508 / S288c) GN=RPL4B PE=1 SV=2	15096	39207	186670	477610	1.09221	1.08571	1.08896	0.131259
_GIS(ph)ELGIYPAVDPLDSK_2	P00830	>sp|P00830|ATPB_YEAST ATP synthase subunit beta, mitochondrial OS=Saccharomyces cerevisiae (strain ATCC 204508 / S288c) GN=ATP2 PE=1 SV=2	50238	167870	642420	1977100	1.10679	1.07106	1.08892	0.149312
_FSGTVS(ph)SDVFK_2	P32499	>sp|P32499|NUP2_YEAST Nucleoporin NUP2 OS=Saccharomyces cerevisiae (strain ATCC 204508 / S288c) GN=NUP2 PE=1 SV=2	41338	116560	386010	1872300	0.970249	1.20583	1.08804	0.188297
_S(ph)CGVDAMSVDDLKK_2	P0CX43;P0CX44	>sp|P0CX43|RL1A_YEAST 60S ribosomal protein L1-A OS=Saccharomyces cerevisiae (strain ATCC 204508 / S288c) GN=RPL1A PE=1 SV=1;>sp|P0CX44|RL1B_YEAST 60S ribosomal protein L1-B OS=Saccharomyces cerevisiae (strain ATCC 204508 / S288c) GN=RPL1B PE=1 SV=1	26866	74340	417040	717330	1.19097	0.984496	1.08774	0.0763896
_SGRS(ph)FDR_2	Q06146	>sp|Q06146|YL257_YEAST Uncharacterized protein YLR257W OS=Saccharomyces cerevisiae (strain ATCC 204508 / S288c) GN=YLR257W PE=1 SV=1	428070	504170	3438000	9402100	0.904791	1.27065	1.08772	0.146171
_ADFDNEFKS(ph)FR_3	P38934	>sp|P38934|BFR1_YEAST Nuclear segregation protein BFR1 OS=Saccharomyces cerevisiae (strain ATCC 204508 / S288c) GN=BFR1 PE=1 SV=1	42599	110880	616530	1140700	1.16055	1.01232	1.08644	0.0881586
_MAFKPFGSAKS(ph)DETK_3	P32499	>sp|P32499|NUP2_YEAST Nucleoporin NUP2 OS=Saccharomyces cerevisiae (strain ATCC 204508 / S288c) GN=NUP2 PE=1 SV=2	185720	176750	1650500	2926700	0.948757	1.21902	1.08389	0.0942094
_SSANSLHPGS(ph)SLR_3	Q12432	>sp|Q12432|EAF3_YEAST Chromatin modification-related protein EAF3 OS=Saccharomyces cerevisiae (strain ATCC 204508 / S288c) GN=EAF3 PE=1 SV=1	16111	29407	223630	305440	1.14241	1.01648	1.07944	0.0448028
_IKS(ph)SIVEEDIVSR_3	P47035	>sp|P47035|NET1_YEAST Nucleolar protein NET1 OS=Saccharomyces cerevisiae (strain ATCC 204508 / S288c) GN=NET1 PE=1 SV=1	19889	51084	249450	586030	1.09837	1.05963	1.079	0.120969
_KGS(ph)YVGIHSTGFK_3	Q07478	>sp|Q07478|SUB2_YEAST ATP-dependent RNA helicase SUB2 OS=Saccharomyces cerevisiae (strain ATCC 204508 / S288c) GN=SUB2 PE=1 SV=1	2624500	6567600	27857000	88874000	1.02589	1.13137	1.07863	0.155312
_TQS(ph)KVDHFLANEAK_3	P38720	>sp|P38720|6PGD1_YEAST 6-phosphogluconate dehydrogenase, decarboxylating 1 OS=Saccharomyces cerevisiae (strain ATCC 204508 / S288c) GN=GND1 PE=1 SV=1	140670	343960	1990500	3489900	1.15076	1.00631	1.07853	0.0808013
_SKPVALTS(ph)FLGYK_3	P14126	>sp|P14126|RL3_YEAST 60S ribosomal protein L3 OS=Saccharomyces cerevisiae (strain ATCC 204508 / S288c) GN=RPL3 PE=1 SV=4	34945	91728	430130	1046000	1.09021	1.05703	1.07362	0.125025
_FGKS(ph)LIDGTR_2	Q07807	>sp|Q07807|PUF3_YEAST mRNA-binding protein PUF3 OS=Saccharomyces cerevisiae (strain ATCC 204508 / S288c) GN=PUF3 PE=1 SV=1	33914	65437	346240	899340	1.009	1.1381	1.07355	0.135929
_KLS(ph)DANSTFK_2	P36094	>sp|P36094|SPC42_YEAST Spindle pole body component SPC42 OS=Saccharomyces cerevisiae (strain ATCC 204508 / S288c) GN=SPC42 PE=1 SV=1	14846	18121	105690	356360	0.852424	1.29371	1.07307	0.16648
_QNQSLS(ph)FR_2	Q06315	>sp|Q06315|SKG3_YEAST Protein SKG3 OS=Saccharomyces cerevisiae (strain ATCC 204508 / S288c) GN=SKG3 PE=1 SV=1	33717	122540	474610	1212100	1.14849	0.995261	1.07187	0.127606
_YDCS(ph)FCGK_2	P0CX25;P0CX26	>sp|P0CX25|RL43A_YEAST 60S ribosomal protein L43-A OS=Saccharomyces cerevisiae (strain ATCC 204508 / S288c) GN=RPL43A PE=1 SV=1;>sp|P0CX26|RL43B_YEAST 60S ribosomal protein L43-B OS=Saccharomyces cerevisiae (strain ATCC 204508 / S288c) GN=RPL43B PE=1 SV=1	28864	52842	256920	824300	0.949441	1.19311	1.07127	0.158508
_TFS(ph)NDDHNGDDPSR_2	P29055	>sp|P29055|TF2B_YEAST Transcription initiation factor IIB OS=Saccharomyces cerevisiae (strain ATCC 204508 / S288c) GN=SUA7 PE=1 SV=1	12779	24398	125500	343020	0.992147	1.14797	1.07006	0.141763
_LLSS(ph)HLK_2	P14164	>sp|P14164|ABF1_YEAST ARS-binding factor 1 OS=Saccharomyces cerevisiae (strain ATCC 204508 / S288c) GN=ABF1 PE=1 SV=4	25352	59259	270820	760280	1.02867	1.10822	1.06844	0.142788
_DSS(ph)MSSYMSSK_2	P15108;P02829	>sp|P15108|HSC82_YEAST ATP-dependent molecular chaperone HSC82 OS=Saccharomyces cerevisiae (strain ATCC 204508 / S288c) GN=HSC82 PE=1 SV=4;>sp|P02829|HSP82_YEAST ATP-dependent molecular chaperone HSP82 OS=Saccharomyces cerevisiae (strain ATCC 204508 / S288	467740	542950	6386100	5440000	1.13523	1.00084	1.06804	0.0299695
_KT(ph)NSTGNVPCLTAEK_3	P48361	>sp|P48361|ASK10_YEAST Activator of SKN7 protein 10 OS=Saccharomyces cerevisiae (strain ATCC 204508 / S288c) GN=ASK10 PE=1 SV=2	363440	19660	619600	1565800	0.231679	1.90115	1.06642	0.197738
_LNLTS(ph)GHLNAGR_2	Q00055	>sp|Q00055|GPD1_YEAST Glycerol-3-phosphate dehydrogenase [NAD(+)] 1 OS=Saccharomyces cerevisiae (strain ATCC 204508 / S288c) GN=GPD1 PE=1 SV=4	198240	340750	1812400	5039000	0.961063	1.16991	1.06549	0.144661
_SQNAPSDGTGS(ph)STPQHHDEDEDELSR_4	P38431	>sp|P38431|IF5_YEAST Eukaryotic translation initiation factor 5 OS=Saccharomyces cerevisiae (strain ATCC 204508 / S288c) GN=TIF5 PE=1 SV=1	69268	2081000	501270	38854000	0.859539	1.27116	1.06535	0.246261
_NTAIGNGS(ph)FFR_2	Q12263	>sp|Q12263|GIN4_YEAST Serine/threonine-protein kinase GIN4 OS=Saccharomyces cerevisiae (strain ATCC 204508 / S288c) GN=GIN4 PE=1 SV=1	28344	119910	481120	953870	1.22979	0.900634	1.06521	0.0916747
_SAVS(ph)ESSVTNSK_2	P47035	>sp|P47035|NET1_YEAST Nucleolar protein NET1 OS=Saccharomyces cerevisiae (strain ATCC 204508 / S288c) GN=NET1 PE=1 SV=1	25790	60168	225190	926680	0.941098	1.18756	1.06433	0.178005
_ATS(ph)DLQR_2	P36080	>sp|P36080|RRP14_YEAST Ribosomal RNA-processing protein 14 OS=Saccharomyces cerevisiae (strain ATCC 204508 / S288c) GN=RRP14 PE=1 SV=1	72690	440560	1399700	3042200	1.28456	0.839183	1.06187	0.0998632
_FSHIKPSAS(ph)SPQSTFK_3	P42845	>sp|P42845|STB1_YEAST Protein STB1 OS=Saccharomyces cerevisiae (strain ATCC 204508 / S288c) GN=STB1 PE=1 SV=2	17815	220640	359180	1451300	1.30453	0.818073	1.0613	0.163871
_LDS(ph)EKHIDFAPTSPFGGAR_3	P05755;O13516	>sp|P05755|RS9B_YEAST 40S ribosomal protein S9-B OS=Saccharomyces cerevisiae (strain ATCC 204508 / S288c) GN=RPS9B PE=1 SV=4;>sp|O13516|RS9A_YEAST 40S ribosomal protein S9-A OS=Saccharomyces cerevisiae (strain ATCC 204508 / S288c) GN=RPS9A PE=1 SV=3	791710	2683200	13162000	21327000	1.22076	0.900277	1.06052	0.0635303
_KIS(ph)TIFDK_2	P06786	>sp|P06786|TOP2_YEAST DNA topoisomerase 2 OS=Saccharomyces cerevisiae (strain ATCC 204508 / S288c) GN=TOP2 PE=1 SV=2	88437	311960	1100500	3311300	1.09496	1.0259	1.06043	0.146412
_MDS(ph)LDPDTFESR_2	P40024	>sp|P40024|ARB1_YEAST ABC transporter ATP-binding protein ARB1 OS=Saccharomyces cerevisiae (strain ATCC 204508 / S288c) GN=ARB1 PE=1 SV=1	49733	64617	541750	782890	1.03715	1.08335	1.06025	0.058827
_SINSES(ph)FSSPSLR_2	Q06146	>sp|Q06146|YL257_YEAST Uncharacterized protein YLR257W OS=Saccharomyces cerevisiae (strain ATCC 204508 / S288c) GN=YLR257W PE=1 SV=1	1336000	863340	6520300	23263000	0.688461	1.43048	1.05947	0.177603
_FNNHNQS(ph)NS(ph)NR_3	P39936	>sp|P39936|IF4F2_YEAST Eukaryotic initiation factor 4F subunit p130 OS=Saccharomyces cerevisiae (strain ATCC 204508 / S288c) GN=TIF4632 PE=1 SV=1	16094	92797	201080	976580	1.0967	1.02217	1.05944	0.184322
_QSS(ph)LLSFFSK_2	Q03834	>sp|Q03834|MSH6_YEAST DNA mismatch repair protein MSH6 OS=Saccharomyces cerevisiae (strain ATCC 204508 / S288c) GN=MSH6 PE=1 SV=1	64311	119830	776850	1296500	1.08205	1.03421	1.05813	0.076682
_THS(ph)IEYK_2	P25366	>sp|P25366|OCA4_YEAST Protein OCA4 OS=Saccharomyces cerevisiae (strain ATCC 204508 / S288c) GN=OCA4 PE=1 SV=1	16866	74414	257470	627810	1.18371	0.926174	1.05494	0.119454
_FSYNTSHS(ph)SSPFTR_3	Q03834	>sp|Q03834|MSH6_YEAST DNA mismatch repair protein MSH6 OS=Saccharomyces cerevisiae (strain ATCC 204508 / S288c) GN=MSH6 PE=1 SV=1	27642	29007	227550	449540	0.915507	1.19027	1.05289	0.10875
_LADANSDTAALS(ph)NSNT(ph)PTMNNAALLQR_3	Q02875	>sp|Q02875|SYH1_YEAST SMY2 homolog 2 OS=Saccharomyces cerevisiae (strain ATCC 204508 / S288c) GN=SYH1 PE=1 SV=1	48476	1408900	2071800	4183700	1.63082	0.47268	1.05175	0.0494516
_EDS(ph)TKQPSTSSLVR_3	Q05022	>sp|Q05022|RRP5_YEAST rRNA biogenesis protein RRP5 OS=Saccharomyces cerevisiae (strain ATCC 204508 / S288c) GN=RRP5 PE=1 SV=1	339420	1326500	4230800	13499000	1.09569	1.00759	1.05164	0.151509
_AAADALS(ph)DLEIKDS(ph)KSNLNK_3	P09938	>sp|P09938|RIR2_YEAST Ribonucleoside-diphosphate reductase small chain 1 OS=Saccharomyces cerevisiae (strain ATCC 204508 / S288c) GN=RNR2 PE=1 SV=2	512910	1099100	5027700	14164000	0.991328	1.11015	1.05074	0.144092
_LDQPILPQNDS(ph)NEDNLK_2	P08431	>sp|P08431|GAL7_YEAST Galactose-1-phosphate uridylyltransferase OS=Saccharomyces cerevisiae (strain ATCC 204508 / S288c) GN=GAL7 PE=1 SV=4	27916	80888	287400	970570	1.01263	1.07914	1.04589	0.159668
_EQQDTLT(ph)PK_2	P38682	>sp|P38682|GLO3_YEAST ADP-ribosylation factor GTPase-activating protein GLO3 OS=Saccharomyces cerevisiae (strain ATCC 204508 / S288c) GN=GLO3 PE=1 SV=1	740170	49436	1083700	4134500	0.165578	1.92238	1.04398	0.223295
_MDS(ph)GNDSATSQGFSMTNEQR_2	P53145	>sp|P53145|LSG1_YEAST Large subunit GTPase 1 OS=Saccharomyces cerevisiae (strain ATCC 204508 / S288c) GN=LSG1 PE=1 SV=1	140120	104400	1333900	1299100	0.978623	1.09494	1.03678	0.000122607
_(ac)S(ph)FLGFGGGQPQLSSQQK_2	P87108	>sp|P87108|TIM10_YEAST Mitochondrial import inner membrane translocase subunit TIM10 OS=Saccharomyces cerevisiae (strain ATCC 204508 / S288c) GN=TIM10 PE=1 SV=1	87380	396370	1142300	3590600	1.11637	0.957066	1.03672	0.148465
_GSNFQS(ph)SSRPPR_2	P34167	>sp|P34167|IF4B_YEAST Eukaryotic translation initiation factor 4B OS=Saccharomyces cerevisiae (strain ATCC 204508 / S288c) GN=TIF3 PE=1 SV=1	37116	85815	226550	1634000	0.785603	1.27969	1.03265	0.211245
_MDLTSFLNDDTFGS(ph)SWAEEDVDLNK_3	P34167	>sp|P34167|IF4B_YEAST Eukaryotic translation initiation factor 4B OS=Saccharomyces cerevisiae (strain ATCC 204508 / S288c) GN=TIF3 PE=1 SV=1	87150	46378	1677700	279480	1.28445	0.780039	1.03224	0.20368
_GDDEANGATS(ph)FDR_2	P14126	>sp|P14126|RL3_YEAST 60S ribosomal protein L3 OS=Saccharomyces cerevisiae (strain ATCC 204508 / S288c) GN=RPL3 PE=1 SV=4	229020	612020	2169400	7490300	0.976466	1.08773	1.0321	0.162478
_ADEFDSFPAASAAAAEEEEDDDVDLFGS(ph)DDEEADAEAEKLK_3	P32471	>sp|P32471|EF1B_YEAST Elongation factor 1-beta OS=Saccharomyces cerevisiae (strain ATCC 204508 / S288c) GN=EFB1 PE=1 SV=4	84937	15993000	12869000	12074000	2.18045	-0.122079	1.02918	0.344684
_(ac)MES(ph)QQLSQHSHISHGSACASVTSK_4	P47098;Q03434;P0C2I6	>sp|P47098|YJ11B_YEAST Transposon Ty1-JR1 Gag-Pol polyprotein OS=Saccharomyces cerevisiae (strain ATCC 204508 / S288c) GN=TY1B-JR1 PE=3 SV=3;>sp|Q03434|YM12B_YEAST Transposon Ty1-ML2 Gag-Pol polyprotein OS=Saccharomyces cerevisiae (strain ATCC 204508 / S28	95419	196560	1309300	1626700	1.1374	0.917812	1.02761	0.0259773
_S(ph)QS(ph)SIADNNGSPVK_2	P47035	>sp|P47035|NET1_YEAST Nucleolar protein NET1 OS=Saccharomyces cerevisiae (strain ATCC 204508 / S288c) GN=NET1 PE=1 SV=1	95131	316410	966740	3506700	1.00699	1.04465	1.02582	0.165107
_IPS(ph)AVGYQPTLATDMGLLQER_3	P00830	>sp|P00830|ATPB_YEAST ATP synthase subunit beta, mitochondrial OS=Saccharomyces cerevisiae (strain ATCC 204508 / S288c) GN=ATP2 PE=1 SV=2	42701	60985	377140	773590	0.946065	1.10329	1.02468	0.110325
_SPS(ph)ALELQVHEIQGK_3	Q12335	>sp|Q12335|PST2_YEAST Protoplast secreted protein 2 OS=Saccharomyces cerevisiae (strain ATCC 204508 / S288c) GN=PST2 PE=1 SV=1	23968	20635	113560	483950	0.675594	1.3702	1.02289	0.189198
_AAADALS(ph)DLEIKDS(ph)K_3	P09938	>sp|P09938|RIR2_YEAST Ribonucleoside-diphosphate reductase small chain 1 OS=Saccharomyces cerevisiae (strain ATCC 204508 / S288c) GN=RNR2 PE=1 SV=2	29610	115840	369720	1028100	1.09643	0.948177	1.02231	0.136408
_TTS(ph)AAGGIR_2	Q00684	>sp|Q00684|CDC14_YEAST Tyrosine-protein phosphatase CDC14 OS=Saccharomyces cerevisiae (strain ATCC 204508 / S288c) GN=CDC14 PE=1 SV=2	234960	1000500	3098900	8402900	1.12021	0.924212	1.02221	0.132494
_GADVVAT(ph)TNSHGK_2	P52488	>sp|P52488|UBA2_YEAST Ubiquitin-activating enzyme E1-like OS=Saccharomyces cerevisiae (strain ATCC 204508 / S288c) GN=UBA2 PE=1 SV=1	34085	123090	345140	1340400	1.00543	1.03701	1.02122	0.170367
_NTFAGGETS(ph)GLEVTDPSDPNSLLK_2	P34223	>sp|P34223|UBX1_YEAST UBX domain-containing protein 1 OS=Saccharomyces cerevisiae (strain ATCC 204508 / S288c) GN=SHP1 PE=1 SV=1	57390	62593	364390	1078900	0.80273	1.23646	1.01959	0.156621
_(ac)S(ph)TLS(ph)DSDTETEVVSR_2	P32608	>sp|P32608|RTG2_YEAST Retrograde regulation protein 2 OS=Saccharomyces cerevisiae (strain ATCC 204508 / S288c) GN=RTG2 PE=1 SV=2	35900	58278	181100	1259400	0.702824	1.33466	1.01874	0.211706
_SSS(ph)ELEKESS(ph)ESEAVKK_3	P38779	>sp|P38779|CIC1_YEAST Proteasome-interacting protein CIC1 OS=Saccharomyces cerevisiae (strain ATCC 204508 / S288c) GN=CIC1 PE=1 SV=1	157040	238170	5873100	687900	1.57286	0.460638	1.01675	0.225007
_LEITKEET(ph)LNPIIQDTK_3	P00817	>sp|P00817|IPYR_YEAST Inorganic pyrophosphatase OS=Saccharomyces cerevisiae (strain ATCC 204508 / S288c) GN=IPP1 PE=1 SV=4	19713	54128	227880	503100	1.06295	0.968232	1.01559	0.111806
_TTPLSANST(ph)GVSSLTR_2	P34216	>sp|P34216|EDE1_YEAST EH domain-containing and endocytosis protein 1 OS=Saccharomyces cerevisiae (strain ATCC 204508 / S288c) GN=EDE1 PE=1 SV=2	108800	631220	1486300	4953000	1.13548	0.894688	1.01508	0.151784
_KS(ph)ELEGR_2	P03872	>sp|P03872|REP2_YEAST Partitioning protein REP2 OS=Saccharomyces cerevisiae (strain ATCC 204508 / S288c) GN=REP2 PE=1 SV=1	32101	225870	446760	1732900	1.14356	0.884915	1.01424	0.164532
_ETDSFKPPS(ph)FK_3	P36152	>sp|P36152|DRE2_YEAST Fe-S cluster assembly protein DRE2 OS=Saccharomyces cerevisiae (strain ATCC 204508 / S288c) GN=DRE2 PE=1 SV=1	33279	53896	205410	930880	0.790451	1.23734	1.01389	0.188308
_QYLSAS(ph)FSLK_2	Q02326;P05739	>sp|Q02326|RL6A_YEAST 60S ribosomal protein L6-A OS=Saccharomyces cerevisiae (strain ATCC 204508 / S288c) GN=RPL6A PE=1 SV=2;>sp|P05739|RL6B_YEAST 60S ribosomal protein L6-B OS=Saccharomyces cerevisiae (strain ATCC 204508 / S288c) GN=RPL6B PE=1 SV=4	98824	281940	1606400	1835100	1.21099	0.813503	1.01225	0.00474029
_SHSEEVIVPEFNS(ph)SAK_3	P04385	>sp|P04385|GAL1_YEAST Galactokinase OS=Saccharomyces cerevisiae (strain ATCC 204508 / S288c) GN=GAL1 PE=1 SV=4	97939	225760	1078700	2165600	1.04195	0.981931	1.01194	0.100996
_(ac)M(ox)NNS(ph)KIPK_2	Q01649	>sp|Q01649|CIK1_YEAST Spindle pole body-associated protein CIK1 OS=Saccharomyces cerevisiae (strain ATCC 204508 / S288c) GN=CIK1 PE=1 SV=1	96834	965470	1665900	5882100	1.23562	0.784794	1.01021	0.151668
_DAFLEATSEDEIIS(ph)R_2	P16861	>sp|P16861|PFKA1_YEAST ATP-dependent 6-phosphofructokinase subunit alpha OS=Saccharomyces cerevisiae (strain ATCC 204508 / S288c) GN=PFK1 PE=1 SV=1	566360	884050	4560200	11467000	0.905891	1.11297	1.00943	0.135135
_ELS(ph)DLHLTVPNLR_2	P24276	>sp|P24276|SSD1_YEAST Protein SSD1 OS=Saccharomyces cerevisiae (strain ATCC 204508 / S288c) GN=SSD1 PE=1 SV=1	95763	242190	798990	3014000	0.921344	1.09499	1.00817	0.170911
_YNS(ph)VEIQEVPR_2	P32349	>sp|P32349|RPC3_YEAST DNA-directed RNA polymerase III subunit RPC3 OS=Saccharomyces cerevisiae (strain ATCC 204508 / S288c) GN=RPC82 PE=1 SV=2	48303	98039	475090	1033400	0.992802	1.02287	1.00784	0.113743
_S(ph)IGEASTGNR_2	P41832	>sp|P41832|BNI1_YEAST Protein BNI1 OS=Saccharomyces cerevisiae (strain ATCC 204508 / S288c) GN=BNI1 PE=1 SV=3	52566	118660	490460	1311800	0.969899	1.04356	1.00673	0.138035
_YNNIINAGLNS(ph)PSLTPS(ph)FAHLSR_3	Q02805	>sp|Q02805|ROD1_YEAST Protein ROD1 OS=Saccharomyces cerevisiae (strain ATCC 204508 / S288c) GN=ROD1 PE=1 SV=1	32459	365340	603580	2022900	1.2694	0.743277	1.00634	0.14438
_RPASSGSSS(ph)STS(ph)VNK_2	Q06685	>sp|Q06685|VIP1_YEAST Inositol hexakisphosphate and diphosphoinositol-pentakisphosphate kinase OS=Saccharomyces cerevisiae (strain ATCC 204508 / S288c) GN=VIP1 PE=1 SV=1	81580	1241500	1984600	5206700	1.38609	0.622616	1.00435	0.107568
_AAADALSDLEIKDS(ph)KSNLNK_4	P09938	>sp|P09938|RIR2_YEAST Ribonucleoside-diphosphate reductase small chain 1 OS=Saccharomyces cerevisiae (strain ATCC 204508 / S288c) GN=RNR2 PE=1 SV=2	314090	58234	899500	2065200	0.456947	1.54979	1.00337	0.159659
_(ac)S(ph)SSDIFDVLNIK_2	P53201	>sp|P53201|SWC4_YEAST SWR1-complex protein 4 OS=Saccharomyces cerevisiae (strain ATCC 204508 / S288c) GN=SWC4 PE=1 SV=1	29039	72731	297590	720420	1.01064	0.995866	1.00325	0.124887
_(ac)MDNGTDSS(ph)TSK_2	Q02821	>sp|Q02821|IMA1_YEAST Importin subunit alpha OS=Saccharomyces cerevisiae (strain ATCC 204508 / S288c) GN=SRP1 PE=1 SV=1	57137	34487	421520	469920	0.867901	1.13437	1.00113	0.0282024
_SENVGTVT(ph)R_2	P38930	>sp|P38930|CSK2C_YEAST Casein kinase II subunit beta OS=Saccharomyces cerevisiae (strain ATCC 204508 / S288c) GN=CKB2 PE=1 SV=1	92271	727630	1320500	5029800	1.15567	0.83964	0.997657	0.16148
_KRS(ph)S(ph)LTYDPVNMAK_3	P09798	>sp|P09798|CDC16_YEAST Anaphase-promoting complex subunit CDC16 OS=Saccharomyces cerevisiae (strain ATCC 204508 / S288c) GN=CDC16 PE=1 SV=1	44118	94031	466570	874130	1.0243	0.968305	0.996303	0.0920158
_AGS(ph)SELEEPIAIRPTSETVMYPYYAK_3	P38708	>sp|P38708|YHI0_YEAST Putative proline--tRNA ligase YHR020W OS=Saccharomyces cerevisiae (strain ATCC 204508 / S288c) GN=YHR020W PE=1 SV=1	214340	319350	2099600	3198500	0.991033	1.00068	0.995856	0.0654629
_ELS(ph)DLHLTVPNLR_3	P24276	>sp|P24276|SSD1_YEAST Protein SSD1 OS=Saccharomyces cerevisiae (strain ATCC 204508 / S288c) GN=SSD1 PE=1 SV=1	124050	276960	997740	3374300	0.905421	1.08577	0.995594	0.162486
_LHSALVS(ph)KES(ph)INSK_3	Q04545	>sp|Q04545|TDA9_YEAST Probable transcription factor TDA9 OS=Saccharomyces cerevisiae (strain ATCC 204508 / S288c) GN=TDA9 PE=1 SV=1	61308	99269	484560	1228700	0.89783	1.09263	0.995231	0.13587
_MSS(ph)QVVQASSK_2	P08018	>sp|P08018|PBS2_YEAST MAP kinase kinase PBS2 OS=Saccharomyces cerevisiae (strain ATCC 204508 / S288c) GN=PBS2 PE=1 SV=4	52872	69251	512230	692140	0.986239	0.999768	0.993004	0.0477365
_QQQPQQNNS(ph)AQFK_2	P39678	>sp|P39678|MBP1_YEAST Transcription factor MBP1 OS=Saccharomyces cerevisiae (strain ATCC 204508 / S288c) GN=MBP1 PE=1 SV=1	29302	53705	250110	608660	0.931234	1.05436	0.992797	0.129462
_RVT(ph)SFEEDNFTR_3	P40079	>sp|P40079|LCP5_YEAST U3 small nucleolar ribonucleoprotein protein LCP5 OS=Saccharomyces cerevisiae (strain ATCC 204508 / S288c) GN=LCP5 PE=1 SV=1	49963	124380	521770	1146400	1.01883	0.964586	0.991708	0.112333
_RVTS(ph)FEEDNFTR_2	P40079	>sp|P40079|LCP5_YEAST U3 small nucleolar ribonucleoprotein protein LCP5 OS=Saccharomyces cerevisiae (strain ATCC 204508 / S288c) GN=LCP5 PE=1 SV=1	383030	443520	2880300	5591900	0.876205	1.10065	0.988426	0.106244
_DFSEDLNS(ph)FDK_2	Q04773	>sp|Q04773|YMW4_YEAST Uncharacterized protein YMR074C OS=Saccharomyces cerevisiae (strain ATCC 204508 / S288c) GN=YMR074C PE=1 SV=1	17624	62860	170250	613890	0.984983	0.989716	0.987349	0.16399
_ELINS(ph)LNLDK_2	P53914	>sp|P53914|KRE33_YEAST UPF0202 protein KRE33 OS=Saccharomyces cerevisiae (strain ATCC 204508 / S288c) GN=KRE33 PE=1 SV=1	24480	49619	163420	696210	0.824494	1.14709	0.985793	0.182626
_MMS(ph)NPGAMQNIQK_2	Q12118	>sp|Q12118|SGT2_YEAST Small glutamine-rich tetratricopeptide repeat-containing protein 2 OS=Saccharomyces cerevisiae (strain ATCC 204508 / S288c) GN=SGT2 PE=1 SV=1	185730	109010	1861900	1013300	1.00107	0.968272	0.984673	0.092518
_T(ph)ASVADPILDAVQEAQPFEQAADTFHDNMNR_3	Q03559	>sp|Q03559|YM8V_YEAST Uncharacterized protein YMR295C OS=Saccharomyces cerevisiae (strain ATCC 204508 / S288c) GN=YMR295C PE=1 SV=1	751900	33883	1132700	2088900	0.177955	1.78994	0.983945	0.191678
_RS(ph)FSSYDLC_2	Q99296	>sp|Q99296|YL149_YEAST Uncharacterized protein YLR149C OS=Saccharomyces cerevisiae (strain ATCC 204508 / S288c) GN=YLR149C PE=1 SV=1	41172	80232	383140	800440	0.968756	0.998981	0.983868	0.108893
_S(ph)SGHFSTDSR_2	Q12018	>sp|Q12018|CDC53_YEAST Cell division control protein 53 OS=Saccharomyces cerevisiae (strain ATCC 204508 / S288c) GN=CDC53 PE=1 SV=1	87713	274040	721420	3077700	0.915124	1.05041	0.982768	0.179242
_LVES(ph)NPELLR_2	Q07915	>sp|Q07915|RLP24_YEAST Ribosome biogenesis protein RLP24 OS=Saccharomyces cerevisiae (strain ATCC 204508 / S288c) GN=RLP24 PE=1 SV=1	125490	344770	1100300	3597400	0.942902	1.01846	0.980681	0.157314
_DAS(ph)ASSTSTFDAR_2	P32521	>sp|P32521|PAN1_YEAST Actin cytoskeleton-regulatory complex protein PAN1 OS=Saccharomyces cerevisiae (strain ATCC 204508 / S288c) GN=PAN1 PE=1 SV=2	224760	22792	507380	918200	0.353614	1.60515	0.979385	0.152681
_GES(ph)YQS(ph)AEQEIDHTAPEK_3	Q06146	>sp|Q06146|YL257_YEAST Uncharacterized protein YLR257W OS=Saccharomyces cerevisiae (strain ATCC 204508 / S288c) GN=YLR257W PE=1 SV=1	861380	3583900	11666000	24005000	1.13173	0.825946	0.978837	0.0950949
_TGAYHGS(ph)NLELYTPK_3	P38863	>sp|P38863|SPC97_YEAST Spindle pole body component SPC97 OS=Saccharomyces cerevisiae (strain ATCC 204508 / S288c) GN=SPC97 PE=1 SV=1	32359	50425	194100	761390	0.77803	1.17896	0.978496	0.178798
_RGT(ph)DDGSFS(ph)TYAHDLDDK_3	P32634	>sp|P32634|PMD1_YEAST Negative regulator of sporulation PMD1 OS=Saccharomyces cerevisiae (strain ATCC 204508 / S288c) GN=PMD1 PE=1 SV=1	17212	58454	175310	516810	1.00798	0.946517	0.977246	0.144275
_SGINGT(ph)SISDRDVEK_3	P32829	>sp|P32829|MRE11_YEAST Double-strand break repair protein MRE11 OS=Saccharomyces cerevisiae (strain ATCC 204508 / S288c) GN=MRE11 PE=1 SV=2	31343	34938	218830	449240	0.843966	1.10918	0.976573	0.11473
_(ac)SQDAAIAEQTPVEHLS(ph)AVDS(ph)AS(ph)HSVLS(ph)TPS(ph)NKAER_3	P39004;P39003	>sp|P39004|HXT7_YEAST High-affinity hexose transporter HXT6 OS=Saccharomyces cerevisiae (strain ATCC 204508 / S288c) GN=HXT7 PE=1 SV=1;>sp|P39003|HXT6_YEAST High-affinity hexose transporter HXT6 OS=Saccharomyces cerevisiae (strain ATCC 204508 / S288c) GN=H	72103	115480	480990	1554000	0.824183	1.12894	0.976563	0.161848
_SLQATS(ph)SILGESAPQLQR_3	P40466	>sp|P40466|FKH1_YEAST Fork head protein homolog 1 OS=Saccharomyces cerevisiae (strain ATCC 204508 / S288c) GN=FKH1 PE=1 SV=1	34922	139630	451160	966050	1.11123	0.840021	0.975626	0.101485
_S(ph)TESEDSLSMEDEQQSAEIK_2	P32521	>sp|P32521|PAN1_YEAST Actin cytoskeleton-regulatory complex protein PAN1 OS=Saccharomyces cerevisiae (strain ATCC 204508 / S288c) GN=PAN1 PE=1 SV=2	55141	48260	373590	622200	0.830921	1.11034	0.970632	0.0887579
_VLT(ph)STQRK_3	P40091	>sp|P40091|PEA2_YEAST Protein PEA2 OS=Saccharomyces cerevisiae (strain ATCC 204508 / S288c) GN=PEA2 PE=1 SV=1	273080	1535200	13299000	2746500	1.68753	0.252615	0.970072	0.220485
_SGGFGGS(ph)FGGR_2	P34167	>sp|P34167|IF4B_YEAST Eukaryotic translation initiation factor 4B OS=Saccharomyces cerevisiae (strain ATCC 204508 / S288c) GN=TIF3 PE=1 SV=1	2914400	5679800	24753000	58202000	0.929079	1.0106	0.969842	0.12457
_FIASAGTY(ph)ANLVK_2	P40024	>sp|P40024|ARB1_YEAST ABC transporter ATP-binding protein ARB1 OS=Saccharomyces cerevisiae (strain ATCC 204508 / S288c) GN=ARB1 PE=1 SV=1	13384	38418	104130	429400	0.89099	1.04833	0.969659	0.177406
_GFVFNS(ph)VQK_2	P39705	>sp|P39705|NUP60_YEAST Nucleoporin NUP60 OS=Saccharomyces cerevisiae (strain ATCC 204508 / S288c) GN=NUP60 PE=1 SV=1	79913	147280	618760	1644300	0.888905	1.04784	0.968371	0.140021
_VTS(ph)FEEDNFTR_2	P40079	>sp|P40079|LCP5_YEAST U3 small nucleolar ribonucleoprotein protein LCP5 OS=Saccharomyces cerevisiae (strain ATCC 204508 / S288c) GN=LCP5 PE=1 SV=1	357600	988860	2969300	10271000	0.919257	1.01648	0.967867	0.162695
_NEKEPS(ph)LQGNKPGFVQQQQR_3	P22579	>sp|P22579|SIN3_YEAST Transcriptional regulatory protein SIN3 OS=Saccharomyces cerevisiae (strain ATCC 204508 / S288c) GN=SIN3 PE=1 SV=2	122510	264990	983410	2738100	0.904563	1.01422	0.959391	0.143371
_VENVS(ph)RNNS(ph)SSFDISNNK_3	P53883	>sp|P53883|NOP13_YEAST Nucleolar protein 13 OS=Saccharomyces cerevisiae (strain ATCC 204508 / S288c) GN=NOP13 PE=1 SV=2	95113	164540	866290	1496100	0.959423	0.958689	0.959056	0.0829033
_EDS(ph)TKQPSTSSLVR_2	Q05022	>sp|Q05022|RRP5_YEAST rRNA biogenesis protein RRP5 OS=Saccharomyces cerevisiae (strain ATCC 204508 / S288c) GN=RRP5 PE=1 SV=1	196880	803870	1935100	6635200	0.992502	0.916668	0.954585	0.157787
_FTPGS(ph)FTNYITR_2	P46654;P32905	>sp|P46654|RSSA2_YEAST 40S ribosomal protein S0-B OS=Saccharomyces cerevisiae (strain ATCC 204508 / S288c) GN=RPS0B PE=1 SV=2;>sp|P32905|RSSA1_YEAST 40S ribosomal protein S0-A OS=Saccharomyces cerevisiae (strain ATCC 204508 / S288c) GN=RPS0A PE=1 SV=3	112940	172780	750570	2091500	0.822543	1.08296	0.952754	0.147874
_SYAEQGKEY(ph)ITDK_3	P22943	>sp|P22943|HSP12_YEAST 12 kDa heat shock protein OS=Saccharomyces cerevisiae (strain ATCC 204508 / S288c) GN=HSP12 PE=1 SV=1	58332	102950	298240	1616500	0.708659	1.19595	0.952304	0.199962
_LS(ph)SITDEADEDNENLSAK_2	Q02455	>sp|Q02455|MLP1_YEAST Protein MLP1 OS=Saccharomyces cerevisiae (strain ATCC 204508 / S288c) GN=MLP1 PE=1 SV=2	27892	225240	348730	1440400	1.09701	0.805838	0.951424	0.167832
_ETDSFKPPS(ph)FK_2	P36152	>sp|P36152|DRE2_YEAST Fe-S cluster assembly protein DRE2 OS=Saccharomyces cerevisiae (strain ATCC 204508 / S288c) GN=DRE2 PE=1 SV=1	66523	119490	516700	1219400	0.890267	1.00881	0.949541	0.126341
_IDATSS(ph)LDSNAAKDEEITELK_3	P53877	>sp|P53877|IPI3_YEAST Pre-rRNA-processing protein IPI3 OS=Saccharomyces cerevisiae (strain ATCC 204508 / S288c) GN=IPI3 PE=1 SV=1	62637	145760	495590	1457600	0.898292	1	0.949146	0.148529
_ISMT(ph)APLTPQQQLLQR_2	P50875	>sp|P50875|SPT20_YEAST Transcription factor SPT20 OS=Saccharomyces cerevisiae (strain ATCC 204508 / S288c) GN=SPT20 PE=1 SV=1	88451	92504	663460	971140	0.875112	1.02112	0.948117	0.065544
_QAAT(ph)SVSATASK_2	P53551	>sp|P53551|H1_YEAST Histone H1 OS=Saccharomyces cerevisiae (strain ATCC 204508 / S288c) GN=HHO1 PE=1 SV=1	10745	19559	67193	245730	0.796118	1.09911	0.947615	0.172146
_KRS(ph)VEEVIER_3	P38883	>sp|P38883|RIX1_YEAST Pre-rRNA-processing protein RIX1 OS=Saccharomyces cerevisiae (strain ATCC 204508 / S288c) GN=RIX1 PE=1 SV=2	99717	194770	746480	2043600	0.874249	1.02087	0.947561	0.142883
_SYESSATQLGS(ph)AR_2	P31380	>sp|P31380|FUN30_YEAST ATP-dependent helicase FUN30 OS=Saccharomyces cerevisiae (strain ATCC 204508 / S288c) GN=FUN30 PE=1 SV=1	79869	185450	697350	1659300	0.941073	0.951698	0.946385	0.123713
_S(ph)LQESGDT(ph)QEEDEEEEDLDADTEDPHSASLINSHLK_4	P32349	>sp|P32349|RPC3_YEAST DNA-directed RNA polymerase III subunit RPC3 OS=Saccharomyces cerevisiae (strain ATCC 204508 / S288c) GN=RPC82 PE=1 SV=2	135840	235940	1016000	2462100	0.873866	1.0185	0.946185	0.130153
_SSFTFGS(ph)TTIEK_2	P32499	>sp|P32499|NUP2_YEAST Nucleoporin NUP2 OS=Saccharomyces cerevisiae (strain ATCC 204508 / S288c) GN=NUP2 PE=1 SV=2	26978	71841	245900	609390	0.959749	0.928523	0.944136	0.126894
_VHACIGGT(ph)SFVEDAEGLR_3	P10081	>sp|P10081|IF4A_YEAST ATP-dependent RNA helicase eIF4A OS=Saccharomyces cerevisiae (strain ATCC 204508 / S288c) GN=TIF1 PE=1 SV=3	420490	1139700	3872500	9536400	0.964236	0.922594	0.943415	0.125843
_QS(ph)TNFT(ph)HSTGSFLQSAPVELTTVSGYQEFLK_3	O43137	>sp|O43137|YB085_YEAST Uncharacterized protein YBR085C-A OS=Saccharomyces cerevisiae (strain ATCC 204508 / S288c) GN=YBR085C-A PE=1 SV=1	8275500	379580	17306000	13747000	0.320402	1.5589	0.939654	0.0608811
_CIVNPSPASITASAELQS(ph)TSAK_3	P07259	>sp|P07259|PYR1_YEAST Protein URA2 OS=Saccharomyces cerevisiae (strain ATCC 204508 / S288c) GN=URA2 PE=1 SV=5	21968	71592	257700	459070	1.06932	0.807014	0.938169	0.0760261
_S(ph)ATS(ph)INLSSHPVSSR_2	P47072	>sp|P47072|YJB6_YEAST Uncharacterized protein YJL016W OS=Saccharomyces cerevisiae (strain ATCC 204508 / S288c) GN=YJL016W PE=1 SV=2	24951	70445	240040	550400	0.983196	0.892828	0.938012	0.115893
_SNGVLNVDNQT(ph)SDLVK_2	P02407;P14127	>sp|P02407|RS17A_YEAST 40S ribosomal protein S17-A OS=Saccharomyces cerevisiae (strain ATCC 204508 / S288c) GN=RPS17A PE=1 SV=1;>sp|P14127|RS17B_YEAST 40S ribosomal protein S17-B OS=Saccharomyces cerevisiae (strain ATCC 204508 / S288c) GN=RPS17B PE=1 SV=1	134640	211760	927270	2281800	0.838032	1.03243	0.935233	0.133599
_SNLS(ph)QENDNEGK_2	P39705	>sp|P39705|NUP60_YEAST Nucleoporin NUP60 OS=Saccharomyces cerevisiae (strain ATCC 204508 / S288c) GN=NUP60 PE=1 SV=1	200490	284730	1019200	4134900	0.706167	1.16203	0.934099	0.183307
_(ac)S(ph)DINEIEIPSR_2	Q08422	>sp|Q08422|YO052_YEAST AN1-type zinc finger protein YOR052C OS=Saccharomyces cerevisiae (strain ATCC 204508 / S288c) GN=YOR052C PE=1 SV=1	430690	640360	2740100	7395600	0.803602	1.06255	0.933075	0.145145
_LANIS(ph)ISQQRPNDR_3	P32769	>sp|P32769|HBS1_YEAST Elongation factor 1 alpha-like protein OS=Saccharomyces cerevisiae (strain ATCC 204508 / S288c) GN=HBS1 PE=1 SV=2	27203	78222	233290	668480	0.933279	0.93176	0.932519	0.143075
_QRES(ph)S(ph)SISVSEELSSADER_3	P31382	>sp|P31382|PMT2_YEAST Dolichyl-phosphate-mannose--protein mannosyltransferase 2 OS=Saccharomyces cerevisiae (strain ATCC 204508 / S288c) GN=PMT2 PE=1 SV=2	45780	135740	666780	682670	1.16331	0.701503	0.932405	0.0201602
_GNNNNSIDDINTQPDEFNDFLNDTSNS(ph)FDTTR_3	P38682	>sp|P38682|GLO3_YEAST ADP-ribosylation factor GTPase-activating protein GLO3 OS=Saccharomyces cerevisiae (strain ATCC 204508 / S288c) GN=GLO3 PE=1 SV=1	236880	394950	1388700	4918100	0.76808	1.09526	0.931668	0.170629
_SITSS(ph)LSDVNGK_2	P49687	>sp|P49687|NU145_YEAST Nucleoporin NUP145 OS=Saccharomyces cerevisiae (strain ATCC 204508 / S288c) GN=NUP145 PE=1 SV=1	43700	108910	347100	999960	0.899973	0.962915	0.931444	0.145536
_NAVSTKPTPPPAPEASAES(ph)GLS(ph)SKVHS(ph)YTDLAYR_4	P16862	>sp|P16862|PFKA2_YEAST ATP-dependent 6-phosphofructokinase subunit beta OS=Saccharomyces cerevisiae (strain ATCC 204508 / S288c) GN=PFK2 PE=1 SV=4	569390	1033400	282880	151390000	-0.303808	2.16583	0.931011	0.250607
_NGNLDVNNQQS(ph)QR_2	Q12263	>sp|Q12263|GIN4_YEAST Serine/threonine-protein kinase GIN4 OS=Saccharomyces cerevisiae (strain ATCC 204508 / S288c) GN=GIN4 PE=1 SV=1	16244	91481	187690	572840	1.06275	0.796702	0.929725	0.141087
_SSS(ph)ELQHAK_2	P50942	>sp|P50942|INP52_YEAST Polyphosphatidylinositol phosphatase INP52 OS=Saccharomyces cerevisiae (strain ATCC 204508 / S288c) GN=INP52 PE=1 SV=1	307380	644920	2734700	5208600	0.949234	0.907215	0.928225	0.0944027
_ASS(ph)DASDLLR_2	P16861	>sp|P16861|PFKA1_YEAST ATP-dependent 6-phosphofructokinase subunit alpha OS=Saccharomyces cerevisiae (strain ATCC 204508 / S288c) GN=PFK1 PE=1 SV=1	2780000	5616400	22121000	50690000	0.90076	0.955464	0.928112	0.120977
_GPS(ph)SITDFLNLK_2	P36041	>sp|P36041|EAP1_YEAST Protein EAP1 OS=Saccharomyces cerevisiae (strain ATCC 204508 / S288c) GN=EAP1 PE=1 SV=1	76059	373450	956530	2125600	1.09955	0.755249	0.927399	0.101778
_T(ph)VS(ph)NITNEEESIVKNPTK_2	Q02875	>sp|Q02875|SYH1_YEAST SMY2 homolog 2 OS=Saccharomyces cerevisiae (strain ATCC 204508 / S288c) GN=SYH1 PE=1 SV=1	65599	51648	409800	586570	0.795675	1.05527	0.925471	0.0680018
_INESS(ph)LVQEGQK_2	Q12009	>sp|Q12009|TRMB_YEAST tRNA (guanine-N(7)-)-methyltransferase OS=Saccharomyces cerevisiae (strain ATCC 204508 / S288c) GN=TRM8 PE=1 SV=1	108820	157380	674220	1798600	0.792093	1.05799	0.925039	0.144395
_NEQHS(ph)PTVESSS(ph)FDVNNAPAR_3	Q03446	>sp|Q03446|RCR2_YEAST Protein RCR2 OS=Saccharomyces cerevisiae (strain ATCC 204508 / S288c) GN=RCR2 PE=1 SV=1	20912	76196	184560	610270	0.945742	0.90359	0.924666	0.155357
_QFQLFQRDS(ph)S(ph)LLFSPAAVAMR_3	P38623	>sp|P38623|RCK2_YEAST Serine/threonine-protein kinase RCK2 OS=Saccharomyces cerevisiae (strain ATCC 204508 / S288c) GN=RCK2 PE=1 SV=3	125150	326120	1733300	1621800	1.14144	0.69662	0.919031	0.0341208
_KDFSEDLNS(ph)FDK_2	Q04773	>sp|Q04773|YMW4_YEAST Uncharacterized protein YMR074C OS=Saccharomyces cerevisiae (strain ATCC 204508 / S288c) GN=YMR074C PE=1 SV=1	51004	216580	419130	1812900	0.914745	0.922755	0.91875	0.177856
_RS(ph)T(ph)TEELNNVMNNTSK_3	P40563	>sp|P40563|AIM21_YEAST Altered inheritance of mitochondria protein 21 OS=Saccharomyces cerevisiae (strain ATCC 204508 / S288c) GN=AIM21 PE=1 SV=1	1560900	92459	3216700	3085600	0.314035	1.52339	0.918713	0.0891595
_KLS(ph)SPDTESK_2	P40563	>sp|P40563|AIM21_YEAST Altered inheritance of mitochondria protein 21 OS=Saccharomyces cerevisiae (strain ATCC 204508 / S288c) GN=AIM21 PE=1 SV=1	693230	2227200	5040400	21012000	0.861588	0.974708	0.918148	0.177611
_TS(ph)FENSGK_2	P53076	>sp|P53076|VID30_YEAST Vacuolar import and degradation protein 30 OS=Saccharomyces cerevisiae (strain ATCC 204508 / S288c) GN=VID30 PE=1 SV=1	17734	116860	194550	727680	1.04022	0.794275	0.91725	0.160309
_RS(ph)T(ph)TEELNNVM(ox)NNTSK_2	P40563	>sp|P40563|AIM21_YEAST Altered inheritance of mitochondria protein 21 OS=Saccharomyces cerevisiae (strain ATCC 204508 / S288c) GN=AIM21 PE=1 SV=1	14719	21700	32322	674660	0.34162	1.49263	0.917123	0.241421
_VSS(ph)IIGGK_2	P40825	>sp|P40825|SYA_YEAST Alanine--tRNA ligase, mitochondrial OS=Saccharomyces cerevisiae (strain ATCC 204508 / S288c) GN=ALA1 PE=1 SV=3	18511	48917	144640	427220	0.892859	0.941192	0.917025	0.147562
_HSAPGT(ph)SSFEEQMSAQQNLLDGSLGDCVVK_3	P53622	>sp|P53622|COPA_YEAST Coatomer subunit alpha OS=Saccharomyces cerevisiae (strain ATCC 204508 / S288c) GN=COP1 PE=1 SV=2	257890	306370	1775600	2976100	0.837911	0.987401	0.912656	0.0854571
_AGHS(ph)VIIK_2	P25343	>sp|P25343|RV161_YEAST Reduced viability upon starvation protein 161 OS=Saccharomyces cerevisiae (strain ATCC 204508 / S288c) GN=RVS161 PE=1 SV=1	86011	229030	670090	1963200	0.891579	0.933072	0.912326	0.14659
_DRSYT(ph)S(ph)VAELNR_3	Q06146	>sp|Q06146|YL257_YEAST Uncharacterized protein YLR257W OS=Saccharomyces cerevisiae (strain ATCC 204508 / S288c) GN=YLR257W PE=1 SV=1	32955	537670	608030	1938200	1.266	0.556883	0.911443	0.12598
_KAPAAAPAAS(ph)K_2	P29547	>sp|P29547|EF1G1_YEAST Elongation factor 1-gamma 1 OS=Saccharomyces cerevisiae (strain ATCC 204508 / S288c) GN=CAM1 PE=1 SV=2	32266	91964	276940	712490	0.933641	0.889161	0.911401	0.130448
_SITSSLS(ph)DVNGK_2	P49687	>sp|P49687|NU145_YEAST Nucleoporin NUP145 OS=Saccharomyces cerevisiae (strain ATCC 204508 / S288c) GN=NUP145 PE=1 SV=1	103400	186950	795000	1616400	0.885847	0.936823	0.911335	0.106563
_ALESVGS(ph)DTTFK_2	P40477	>sp|P40477|NU159_YEAST Nucleoporin NUP159 OS=Saccharomyces cerevisiae (strain ATCC 204508 / S288c) GN=NUP159 PE=1 SV=1	340680	588730	2358200	5650300	0.840234	0.982155	0.911195	0.129267
_EINTLSNQLDELYLS(ph)DDS(ph)IS(ph)SATKK_3	P32501	>sp|P32501|EI2BE_YEAST Translation initiation factor eIF-2B subunit epsilon OS=Saccharomyces cerevisiae (strain ATCC 204508 / S288c) GN=GCD6 PE=1 SV=1	82301	973300	2070400	2563700	1.40065	0.42062	0.910635	0.035231
_QNS(ph)DVFQSQGR_2	P30665	>sp|P30665|MCM4_YEAST DNA replication licensing factor MCM4 OS=Saccharomyces cerevisiae (strain ATCC 204508 / S288c) GN=MCM4 PE=1 SV=2	215450	424430	1577700	3835200	0.864678	0.955982	0.91033	0.129047
_IKTDELSFS(ph)R_2	Q12196	>sp|Q12196|RIO1_YEAST Serine/threonine-protein kinase RIO1 OS=Saccharomyces cerevisiae (strain ATCC 204508 / S288c) GN=RIO1 PE=1 SV=1	36009	99226	240160	983020	0.82409	0.995937	0.910013	0.17774
_VATKS(ph)VS(ph)ADSK_2	P32325	>sp|P32325|DBF4_YEAST DDK kinase regulatory subunit DBF4 OS=Saccharomyces cerevisiae (strain ATCC 204508 / S288c) GN=DBF4 PE=1 SV=2	56145	303140	622630	1800000	1.04492	0.773629	0.909274	0.134838
_TISLS(ph)NIK_2	P53920	>sp|P53920|NM111_YEAST Pro-apoptotic serine protease NMA111 OS=Saccharomyces cerevisiae (strain ATCC 204508 / S288c) GN=NMA111 PE=1 SV=1	22826	63235	173050	546970	0.879742	0.937006	0.908374	0.154154
_KKS(ph)GIFSK_3	P38822	>sp|P38822|BZZ1_YEAST Protein BZZ1 OS=Saccharomyces cerevisiae (strain ATCC 204508 / S288c) GN=BZZ1 PE=1 SV=1	63777	1213200	1756600	2876000	1.44001	0.374856	0.907433	0.00284787
_TTATAAQT(ph)SGTDNKPVPAGIHPDR_3	Q07623	>sp|Q07623|NOP6_YEAST Nucleolar protein 6 OS=Saccharomyces cerevisiae (strain ATCC 204508 / S288c) GN=NOP6 PE=1 SV=1	80454	168170	608290	1452100	0.878563	0.936248	0.907406	0.125844
_ESNS(ph)S(ph)VSLKS(ph)QHSDKK_3	Q00816	>sp|Q00816|REG1_YEAST Resistance to glucose repression protein 1 OS=Saccharomyces cerevisiae (strain ATCC 204508 / S288c) GN=REG1 PE=1 SV=1	44501	5212400	3188200	4749400	1.85518	-0.040399	0.907388	0.296546
_KKPS(ph)GGFASLIK_3	P47035	>sp|P47035|NET1_YEAST Nucleolar protein NET1 OS=Saccharomyces cerevisiae (strain ATCC 204508 / S288c) GN=NET1 PE=1 SV=1	109100	249540	846350	2080500	0.889725	0.921028	0.905376	0.128152
_S(ph)NSHAS(ph)SLHSR_2	P26570	>sp|P26570|PPZ1_YEAST Serine/threonine-protein phosphatase PP-Z1 OS=Saccharomyces cerevisiae (strain ATCC 204508 / S288c) GN=PPZ1 PE=1 SV=5	55604	130570	435810	1073400	0.894191	0.914918	0.904555	0.127987
_S(ph)VNHS(ph)SSTLQTDDISVDK_3	P32521	>sp|P32521|PAN1_YEAST Actin cytoskeleton-regulatory complex protein PAN1 OS=Saccharomyces cerevisiae (strain ATCC 204508 / S288c) GN=PAN1 PE=1 SV=2	175560	422080	1420500	3356000	0.908016	0.900427	0.904221	0.122262
_QEAFSTNS(ph)SNK_2	P34223	>sp|P34223|UBX1_YEAST UBX domain-containing protein 1 OS=Saccharomyces cerevisiae (strain ATCC 204508 / S288c) GN=SHP1 PE=1 SV=1	45403	45886	276200	483460	0.784139	1.02268	0.90341	0.0955041
_NPISSTVSS(ph)NQQS(ph)PK_2	P53550	>sp|P53550|DCP2_YEAST mRNA-decapping enzyme subunit 2 OS=Saccharomyces cerevisiae (strain ATCC 204508 / S288c) GN=DCP2 PE=1 SV=1	85623	27909	252110	606530	0.469	1.33711	0.903054	0.160821
_NANQES(ph)VEEAVLK_2	P21538	>sp|P21538|REB1_YEAST DNA-binding protein REB1 OS=Saccharomyces cerevisiae (strain ATCC 204508 / S288c) GN=REB1 PE=1 SV=2	159480	399510	1134200	3592300	0.851983	0.953845	0.902914	0.155684
_GS(ph)NFQGDGR_2	P34167	>sp|P34167|IF4B_YEAST Eukaryotic translation initiation factor 4B OS=Saccharomyces cerevisiae (strain ATCC 204508 / S288c) GN=TIF3 PE=1 SV=1	27317	213890	336280	1108600	1.09027	0.714584	0.902426	0.144162
_TAQQPQQFAPS(ph)PSNKK_3	P08018	>sp|P08018|PBS2_YEAST MAP kinase kinase PBS2 OS=Saccharomyces cerevisiae (strain ATCC 204508 / S288c) GN=PBS2 PE=1 SV=4	1477300	34217	957120	3350600	-0.188502	1.99088	0.901189	0.299524
_KDFSEDLNS(ph)FDKQNAK_3	Q04773	>sp|Q04773|YMW4_YEAST Uncharacterized protein YMR074C OS=Saccharomyces cerevisiae (strain ATCC 204508 / S288c) GN=YMR074C PE=1 SV=1	790240	1891900	5737600	16461000	0.860971	0.939558	0.900265	0.145798
_LNDS(ph)FADDLENGLHSR_3	Q8J0M4	>sp|Q8J0M4|YCB2_YEAST UPF0357 protein YCL012C OS=Saccharomyces cerevisiae (strain ATCC 204508 / S288c) GN=YCL012C PE=1 SV=2	109000	170290	729960	1603600	0.825873	0.973907	0.89989	0.119867
_AIS(ph)SDQLFGRGS(ph)FDEAANR_3	P38682	>sp|P38682|GLO3_YEAST ADP-ribosylation factor GTPase-activating protein GLO3 OS=Saccharomyces cerevisiae (strain ATCC 204508 / S288c) GN=GLO3 PE=1 SV=1	237640	584100	2039800	4288200	0.933668	0.865788	0.899728	0.105865
_FIEATKES(ph)DEDS(ph)DADEFFDAEEAASDKK_4	P35845	>sp|P35845|OSH1_YEAST Oxysterol-binding protein homolog 1 OS=Saccharomyces cerevisiae (strain ATCC 204508 / S288c) GN=SWH1 PE=1 SV=4	105900	2379500	2830000	5558500	1.42689	0.368472	0.897681	0.024481
_INES(ph)SLVQEGQK_2	Q12009	>sp|Q12009|TRMB_YEAST tRNA (guanine-N(7)-)-methyltransferase OS=Saccharomyces cerevisiae (strain ATCC 204508 / S288c) GN=TRM8 PE=1 SV=1	24707	170520	168100	1555100	0.832748	0.959983	0.896365	0.217152
_ADT(ph)DLAMNDDDFLSK_2	P22082	>sp|P22082|SNF2_YEAST Transcription regulatory protein SNF2 OS=Saccharomyces cerevisiae (strain ATCC 204508 / S288c) GN=SNF2 PE=1 SV=1	34804	141590	462440	661160	1.12343	0.669274	0.89635	0.0307981
_AAAS(ph)TLEDIEVK_2	P38431	>sp|P38431|IF5_YEAST Eukaryotic translation initiation factor 5 OS=Saccharomyces cerevisiae (strain ATCC 204508 / S288c) GN=TIF5 PE=1 SV=1	65759	492850	815920	2442900	1.09369	0.695191	0.894442	0.133105
_TRS(ph)EINK_2	Q99207	>sp|Q99207|NOP14_YEAST Nucleolar complex protein 14 OS=Saccharomyces cerevisiae (strain ATCC 204508 / S288c) GN=NOP14 PE=1 SV=1	36401	137910	222740	1381100	0.786685	1.00063	0.893657	0.202642
_M(ox)CGIY(ph)PYQLVT(ph)S(ph)S(ph)AS(ph)PK_3	P53837	>sp|P53837|YN16_YEAST Putative uncharacterized protein YNL276C OS=Saccharomyces cerevisiae (strain ATCC 204508 / S288c) GN=YNL276C PE=5 SV=1	3707200	43146	2467200	3914200	-0.176842	1.9577	0.89043	0.348676
_QS(ph)TNFT(ph)HSTGSFLQSAPVELTTVSGYQEFLK_4	O43137	>sp|O43137|YB085_YEAST Uncharacterized protein YBR085C-A OS=Saccharomyces cerevisiae (strain ATCC 204508 / S288c) GN=YBR085C-A PE=1 SV=1	79767	2471900	986010	11997000	1.09206	0.686042	0.88905	0.219806
_ASS(ph)DAS(ph)DLLR_2	P16861	>sp|P16861|PFKA1_YEAST ATP-dependent 6-phosphofructokinase subunit alpha OS=Saccharomyces cerevisiae (strain ATCC 204508 / S288c) GN=PFK1 PE=1 SV=1	1024200	3194100	9009900	21725000	0.944335	0.832611	0.888473	0.120483
_RAES(ph)QRLEEDNDLEDGTK_3	P41815	>sp|P41815|BAP3_YEAST Valine amino-acid permease OS=Saccharomyces cerevisiae (strain ATCC 204508 / S288c) GN=BAP3 PE=1 SV=2	112290	213240	722600	1982700	0.808557	0.968388	0.888473	0.144278
_TVIDPEDTIFIGNVAHECT(ph)EDDLK_3	P10080	>sp|P10080|SSBP1_YEAST Single-stranded nucleic acid-binding protein OS=Saccharomyces cerevisiae (strain ATCC 204508 / S288c) GN=SBP1 PE=1 SV=2	81000	599260	1009200	2871300	1.09549	0.680463	0.887978	0.126547
_NPS(ph)DITQEEYNAFYK_2	P15108;P02829	>sp|P15108|HSC82_YEAST ATP-dependent molecular chaperone HSC82 OS=Saccharomyces cerevisiae (strain ATCC 204508 / S288c) GN=HSC82 PE=1 SV=4;>sp|P02829|HSP82_YEAST ATP-dependent molecular chaperone HSP82 OS=Saccharomyces cerevisiae (strain ATCC 204508 / S288	648110	869400	3500200	9610000	0.732444	1.0435	0.887974	0.149602
_AAADALSDLEIKDS(ph)K_3	P09938	>sp|P09938|RIR2_YEAST Ribonucleoside-diphosphate reductase small chain 1 OS=Saccharomyces cerevisiae (strain ATCC 204508 / S288c) GN=RNR2 PE=1 SV=2	240060	1163900	2504700	6656800	1.01844	0.75735	0.887893	0.125524
_SELKS(ph)TEQIR_3	Q12389	>sp|Q12389|DBP10_YEAST ATP-dependent RNA helicase DBP10 OS=Saccharomyces cerevisiae (strain ATCC 204508 / S288c) GN=DBP10 PE=1 SV=2	23026	147790	237430	855120	1.01332	0.762382	0.88785	0.156317
_GES(ph)YQS(ph)AEQEIDHTAPEK_2	Q06146	>sp|Q06146|YL257_YEAST Uncharacterized protein YLR257W OS=Saccharomyces cerevisiae (strain ATCC 204508 / S288c) GN=YLR257W PE=1 SV=1	368180	1106300	3683000	6578100	1.00014	0.774228	0.887185	0.076625
_(ac)S(ph)ENNGNPLDLSSLR_2	Q12176	>sp|Q12176|MAK21_YEAST Ribosome biogenesis protein MAK21 OS=Saccharomyces cerevisiae (strain ATCC 204508 / S288c) GN=MAK21 PE=1 SV=1	108550	193430	821350	1508500	0.878898	0.892021	0.88546	0.0918957
_AS(ph)TEGSVTTEFLSDIIGK_2	Q06406	>sp|Q06406|LSM6_YEAST U6 snRNA-associated Sm-like protein LSm6 OS=Saccharomyces cerevisiae (strain ATCC 204508 / S288c) GN=LSM6 PE=1 SV=2	53159	121710	377510	1010100	0.851352	0.919038	0.885195	0.138572
_(ac)S(ph)YTDNPPQTK_2	O13297	>sp|O13297|CET1_YEAST mRNA-capping enzyme subunit beta OS=Saccharomyces cerevisiae (strain ATCC 204508 / S288c) GN=CET1 PE=1 SV=2	116800	237280	666710	2446300	0.756494	1.01325	0.884871	0.172339
_DQIERLS(ph)EFK_3	P53735	>sp|P53735|ZRG17_YEAST Protein ZRG17 OS=Saccharomyces cerevisiae (strain ATCC 204508 / S288c) GN=ZRG17 PE=1 SV=1	2595300	4969400	18610000	40757000	0.855559	0.913898	0.884729	0.116066
_NS(ph)EGSS(ph)PCYNDDQIR_2	P48361	>sp|P48361|ASK10_YEAST Activator of SKN7 protein 10 OS=Saccharomyces cerevisiae (strain ATCC 204508 / S288c) GN=ASK10 PE=1 SV=2	134100	547970	1221400	3513400	0.959429	0.806971	0.8832	0.138134
_VKS(ph)PNIVTLNIS(ph)R_2	P39956	>sp|P39956|RPH1_YEAST DNA damage-responsive transcriptional repressor RPH1 OS=Saccharomyces cerevisiae (strain ATCC 204508 / S288c) GN=RPH1 PE=1 SV=1	59035	203070	545470	1280100	0.965661	0.799598	0.88263	0.114966
_NANFS(ph)YHENQQLLENGTK_3	P15274	>sp|P15274|AMPD_YEAST AMP deaminase OS=Saccharomyces cerevisiae (strain ATCC 204508 / S288c) GN=AMD1 PE=1 SV=2	47802	95033	306620	861610	0.807154	0.957436	0.882295	0.146355
_TVS(ph)NIT(ph)NEEESIVK_2	Q02875	>sp|Q02875|SYH1_YEAST SMY2 homolog 2 OS=Saccharomyces cerevisiae (strain ATCC 204508 / S288c) GN=SYH1 PE=1 SV=1	383100	973750	3477500	6222100	0.957955	0.80549	0.881722	0.0804257
_NIS(ph)MDDDDALNS(ph)PDMGQEYEGR_3	Q03954	>sp|Q03954|SPC19_YEAST DASH complex subunit SPC19 OS=Saccharomyces cerevisiae (strain ATCC 204508 / S288c) GN=SPC19 PE=1 SV=1	84459	89636	791080	555070	0.971574	0.791865	0.88172	0.0646004
_DKS(ph)KGNDAFSDLFSYSK_3	Q03769	>sp|Q03769|ENT5_YEAST Epsin-5 OS=Saccharomyces cerevisiae (strain ATCC 204508 / S288c) GN=ENT5 PE=1 SV=1	60753	297430	585310	1786600	0.983818	0.778643	0.88123	0.142196
_VFNVPIHS(ph)VNDGKPTQLIK_3	P25588	>sp|P25588|MRC1_YEAST Mediator of replication checkpoint protein 1 OS=Saccharomyces cerevisiae (strain ATCC 204508 / S288c) GN=MRC1 PE=1 SV=3	47925	137270	405790	935600	0.927739	0.833515	0.880627	0.11586
_S(ph)SGIDLLDFDSQPGESK_2	Q06336	>sp|Q06336|GGA1_YEAST ADP-ribosylation factor-binding protein GGA1 OS=Saccharomyces cerevisiae (strain ATCC 204508 / S288c) GN=GGA1 PE=1 SV=1	687780	1499600	5743800	10194000	0.92175	0.832369	0.877059	0.0823382
_AVTT(ph)TFDKVHQDW_3	P07264	>sp|P07264|LEUC_YEAST 3-isopropylmalate dehydratase OS=Saccharomyces cerevisiae (strain ATCC 204508 / S288c) GN=LEU1 PE=1 SV=3	97600	106410	889450	662510	0.959672	0.79421	0.876941	0.0551134
_YNCDKS(ph)VCR_2	P0CH08;P0CH09	>sp|P0CH08|RL401_YEAST Ubiquitin-60S ribosomal protein L40 OS=Saccharomyces cerevisiae (strain ATCC 204508 / S288c) GN=RPL40A PE=1 SV=1;>sp|P0CH09|RL402_YEAST Ubiquitin-60S ribosomal protein L40 OS=Saccharomyces cerevisiae (strain ATCC 204508 / S288c) GN=R	39684	47493	194310	549730	0.68988	1.06352	0.8767	0.154932
_DHS(ph)KISDGTSGESSLVK_3	P53920	>sp|P53920|NM111_YEAST Pro-apoptotic serine protease NMA111 OS=Saccharomyces cerevisiae (strain ATCC 204508 / S288c) GN=NMA111 PE=1 SV=1	158560	127390	683670	1667400	0.634653	1.1169	0.875779	0.145399
_NS(ph)QYKPK_2	P23291	>sp|P23291|KC11_YEAST Casein kinase I homolog 1 OS=Saccharomyces cerevisiae (strain ATCC 204508 / S288c) GN=YCK1 PE=1 SV=1	24888	560520	437180	1786900	1.24467	0.503509	0.87409	0.146767
_ADT(ph)REALDFFAR_3	P00330;P00331;P38113	>sp|P00330|ADH1_YEAST Alcohol dehydrogenase 1 OS=Saccharomyces cerevisiae (strain ATCC 204508 / S288c) GN=ADH1 PE=1 SV=5;>sp|P00331|ADH2_YEAST Alcohol dehydrogenase 2 OS=Saccharomyces cerevisiae (strain ATCC 204508 / S288c) GN=ADH2 PE=1 SV=3;>sp|P38113|ADH	62701	94211	351470	939750	0.748614	0.998911	0.873762	0.145244
_TSS(ph)SM(ox)S(ph)VGNNKK_2	P38426	>sp|P38426|TPS3_YEAST Trehalose synthase complex regulatory subunit TPS3 OS=Saccharomyces cerevisiae (strain ATCC 204508 / S288c) GN=TPS3 PE=1 SV=3	51575	717190	221230	9285800	0.632405	1.11219	0.872295	0.243698
_RVS(ph)DYQK_2	P09938	>sp|P09938|RIR2_YEAST Ribonucleoside-diphosphate reductase small chain 1 OS=Saccharomyces cerevisiae (strain ATCC 204508 / S288c) GN=RNR2 PE=1 SV=2	341030	608650	1659300	6889800	0.687132	1.05384	0.870486	0.18415
_LVS(ph)SSGIK_2	P05453	>sp|P05453|ERF3_YEAST Eukaryotic peptide chain release factor GTP-binding subunit OS=Saccharomyces cerevisiae (strain ATCC 204508 / S288c) GN=SUP35 PE=1 SV=1	163780	927650	1353700	6174500	0.917262	0.823218	0.87024	0.179012
_VKS(ph)PNIVTLNIS(ph)R_3	P39956	>sp|P39956|RPH1_YEAST DNA damage-responsive transcriptional repressor RPH1 OS=Saccharomyces cerevisiae (strain ATCC 204508 / S288c) GN=RPH1 PE=1 SV=1	36763	156120	335210	941900	0.959906	0.780546	0.870226	0.13446
_INFTSMTQS(ph)QIK_2	P10862	>sp|P10862|RAD18_YEAST Postreplication repair E3 ubiquitin-protein ligase RAD18 OS=Saccharomyces cerevisiae (strain ATCC 204508 / S288c) GN=RAD18 PE=1 SV=1	35886	34100	206210	325000	0.759385	0.979129	0.869257	0.0813929
_ATS(ph)DGPSTPLIK_2	P38241	>sp|P38241|SLT11_YEAST Pre-mRNA-splicing factor SLT11 OS=Saccharomyces cerevisiae (strain ATCC 204508 / S288c) GN=ECM2 PE=1 SV=1	37122	93939	208640	907600	0.749766	0.985049	0.867407	0.183869
_LES(ph)FILNSISDR_2	P33419	>sp|P33419|SPC29_YEAST Spindle pole component 29 OS=Saccharomyces cerevisiae (strain ATCC 204508 / S288c) GN=SPC29 PE=1 SV=1	16025	37194	115070	277870	0.856164	0.873369	0.864766	0.12573
_SINSESFSSPSLRAS(ph)K_3	Q06146	>sp|Q06146|YL257_YEAST Uncharacterized protein YLR257W OS=Saccharomyces cerevisiae (strain ATCC 204508 / S288c) GN=YLR257W PE=1 SV=1	69895	75462	291550	964140	0.620267	1.10641	0.863339	0.172194
_KET(ph)SPDS(ph)ISIR_2	P38084	>sp|P38084|BAP2_YEAST Leu/Val/Ile amino-acid permease OS=Saccharomyces cerevisiae (strain ATCC 204508 / S288c) GN=BAP2 PE=1 SV=2	17303	969370	568970	1558400	1.51697	0.206189	0.861579	0.0104224
_DALLS(ph)ANTK_2	Q03063	>sp|Q03063|DIG1_YEAST Down-regulator of invasive growth 1 OS=Saccharomyces cerevisiae (strain ATCC 204508 / S288c) GN=DIG1 PE=1 SV=1	169370	325000	893290	3254400	0.722156	1.00059	0.861372	0.172884
_FIS(ph)AYDAKPDFVAR_3	P04385	>sp|P04385|GAL1_YEAST Galactokinase OS=Saccharomyces cerevisiae (strain ATCC 204508 / S288c) GN=GAL1 PE=1 SV=4	24851	52195	176410	387610	0.851179	0.870766	0.860973	0.114911
_S(ph)SAESSNATNNNTLGTESK_2	P38250	>sp|P38250|IST2_YEAST Increased sodium tolerance protein 2 OS=Saccharomyces cerevisiae (strain ATCC 204508 / S288c) GN=IST2 PE=1 SV=2	102960	100960	2383600	229300	1.36456	0.356255	0.86041	0.232106
_RSST(ph)INNDSDS(ph)LSSPTK_2	P24276	>sp|P24276|SSD1_YEAST Protein SSD1 OS=Saccharomyces cerevisiae (strain ATCC 204508 / S288c) GN=SSD1 PE=1 SV=1	7078.4	20089	53927	138320	0.881871	0.837927	0.859899	0.129912
_RM(ox)S(ph)S(ph)SSGGDSISR_2	Q9P305	>sp|Q9P305|IGO2_YEAST mRNA stability protein IGO2 OS=Saccharomyces cerevisiae (strain ATCC 204508 / S288c) GN=IGO2 PE=1 SV=3	177160	810940	819910	9188200	0.665401	1.05424	0.859821	0.225625
_KKS(ph)SYGSSNNDSYGSNNDDSYGSSNK_4	P18899	>sp|P18899|DDR48_YEAST Stress protein DDR48 OS=Saccharomyces cerevisiae (strain ATCC 204508 / S288c) GN=DDR48 PE=1 SV=4	50443	95310	330730	760500	0.816673	0.901961	0.859317	0.123062
_VWLDPNETS(ph)EIAQANSR_3	P0CX82;P0CX83	>sp|P0CX82|RL19A_YEAST 60S ribosomal protein L19-A OS=Saccharomyces cerevisiae (strain ATCC 204508 / S288c) GN=RPL19A PE=1 SV=1;>sp|P0CX83|RL19B_YEAST 60S ribosomal protein L19-B OS=Saccharomyces cerevisiae (strain ATCC 204508 / S288c) GN=RPL19B PE=1 SV=1	140560	213650	1316700	1180400	0.971625	0.742326	0.856976	0.0310049
_SYDYDDDSEIS(ph)FR_2	P15424	>sp|P15424|MS116_YEAST ATP-dependent RNA helicase MSS116, mitochondrial OS=Saccharomyces cerevisiae (strain ATCC 204508 / S288c) GN=MSS116 PE=1 SV=1	38527	135740	285990	943430	0.870586	0.842002	0.856294	0.155366
_ISNVS(ph)FDSK_2	Q03306	>sp|Q03306|PKH3_YEAST Serine/threonine-protein kinase PKH3 OS=Saccharomyces cerevisiae (strain ATCC 204508 / S288c) GN=PKH3 PE=1 SV=1	42317	125760	296150	925150	0.844997	0.86667	0.855833	0.152131
_LHGVS(ph)FK_2	P0C2H8;P0C2H9	>sp|P0C2H8|RL31A_YEAST 60S ribosomal protein L31-A OS=Saccharomyces cerevisiae (strain ATCC 204508 / S288c) GN=RPL31A PE=1 SV=1;>sp|P0C2H9|RL31B_YEAST 60S ribosomal protein L31-B OS=Saccharomyces cerevisiae (strain ATCC 204508 / S288c) GN=RPL31B PE=1 SV=1	174740	361310	1132100	2861700	0.811492	0.898744	0.855118	0.133605
_TAS(ph)FQDIINK_2	P32367	>sp|P32367|TFC1_YEAST Transcription factor tau 95 kDa subunit OS=Saccharomyces cerevisiae (strain ATCC 204508 / S288c) GN=TFC1 PE=1 SV=1	44781	66668	222920	686600	0.697055	1.01279	0.854921	0.160933
_CPS(ph)IIKK_2	P04385	>sp|P04385|GAL1_YEAST Galactokinase OS=Saccharomyces cerevisiae (strain ATCC 204508 / S288c) GN=GAL1 PE=1 SV=4	115270	133170	540650	1454400	0.6712	1.03828	0.854739	0.150854
_(ac)S(ph)FENKLPT(ph)PLENNDAK_2	Q04170	>sp|Q04170|YD391_YEAST Uncharacterized protein YDR391C OS=Saccharomyces cerevisiae (strain ATCC 204508 / S288c) GN=YDR391C PE=1 SV=1	62314	115270	303770	1210400	0.687959	1.02121	0.854586	0.180924
_NEES(ph)GEEDIFAEYPIK_2	P38167	>sp|P38167|ECM21_YEAST Protein ECM21 OS=Saccharomyces cerevisiae (strain ATCC 204508 / S288c) GN=ECM21 PE=1 SV=2	109650	237090	707270	1875700	0.809577	0.89825	0.853913	0.138681
_IDPSSDIANLKNES(ph)K_3	P15891	>sp|P15891|ABP1_YEAST Actin-binding protein OS=Saccharomyces cerevisiae (strain ATCC 204508 / S288c) GN=ABP1 PE=1 SV=4	62656	73230	305830	762450	0.688517	1.01752	0.85302	0.142033
_KNDLYS(ph)K_3	Q07653	>sp|Q07653|HBT1_YEAST Protein HBT1 OS=Saccharomyces cerevisiae (strain ATCC 204508 / S288c) GN=HBT1 PE=1 SV=1	459670	552740	1747100	7370200	0.579872	1.12496	0.852415	0.190589
_DQIERLS(ph)EFK_2	P53735	>sp|P53735|ZRG17_YEAST Protein ZRG17 OS=Saccharomyces cerevisiae (strain ATCC 204508 / S288c) GN=ZRG17 PE=1 SV=1	3441600	6534600	23043000	49353000	0.825779	0.878095	0.851937	0.113348
_PQVS(ph)FNDETPK_2	P32660	>sp|P32660|ATC5_YEAST Phospholipid-transporting ATPase DNF1 OS=Saccharomyces cerevisiae (strain ATCC 204508 / S288c) GN=DNF1 PE=1 SV=2	39666	244980	263910	1856800	0.823037	0.879634	0.851336	0.205998
_SIS(ph)IDS(ph)STLSR_2	P43565	>sp|P43565|RIM15_YEAST Serine/threonine-protein kinase RIM15 OS=Saccharomyces cerevisiae (strain ATCC 204508 / S288c) GN=RIM15 PE=1 SV=1	29670	14400	96698	221570	0.5131	1.18715	0.850124	0.150397
_KST(ph)STNDFS(ph)ENSLDAPHDQEVIHTSNPFLK_4	P47116	>sp|P47116|PTK2_YEAST Serine/threonine-protein kinase PTK2/STK2 OS=Saccharomyces cerevisiae (strain ATCC 204508 / S288c) GN=PTK2 PE=1 SV=1	84523	229240	77533	12469000	-0.0374883	1.73554	0.849026	0.250182
_EKQES(ph)ATLDHES(ph)ISR_3	P35724	>sp|P35724|MNR2_YEAST Manganese resistance protein MNR2 OS=Saccharomyces cerevisiae (strain ATCC 204508 / S288c) GN=MNR2 PE=1 SV=1	28003	1358400	886070	2141200	1.50026	0.19763	0.848947	0.0145907
_STS(ph)EYSSK_2	P38198	>sp|P38198|STU1_YEAST Protein STU1 OS=Saccharomyces cerevisiae (strain ATCC 204508 / S288c) GN=STU1 PE=1 SV=1	21131	74672	211130	371700	0.99963	0.697035	0.848332	0.0688572
_SS(ph)KS(ph)FLNFIGR_2	Q08732	>sp|Q08732|HRK1_YEAST Serine/threonine-protein kinase HRK1 OS=Saccharomyces cerevisiae (strain ATCC 204508 / S288c) GN=HRK1 PE=1 SV=1	548350	252080	1937200	3536500	0.548117	1.14704	0.847576	0.122658
_FNIS(ph)EGDITK_2	P53840	>sp|P53840|TOF1_YEAST Topoisomerase 1-associated factor 1 OS=Saccharomyces cerevisiae (strain ATCC 204508 / S288c) GN=TOF1 PE=1 SV=1	109740	252700	724240	1879300	0.819518	0.871391	0.845454	0.135024
_KESS(ph)IIR_2	Q08492	>sp|Q08492|BUD21_YEAST Bud site selection protein 21 OS=Saccharomyces cerevisiae (strain ATCC 204508 / S288c) GN=BUD21 PE=1 SV=1	62514	146270	325130	1379500	0.71608	0.974566	0.845323	0.183214
_PQINT(ph)SPK_2	P46674	>sp|P46674|SAC3_YEAST Nuclear mRNA export protein SAC3 OS=Saccharomyces cerevisiae (strain ATCC 204508 / S288c) GN=SAC3 PE=1 SV=2	73413	974760	857010	4087300	1.06721	0.622539	0.844876	0.171495
_EQISNNVGVTTNS(ph)TSNEETSR_3	P38439	>sp|P38439|LEO1_YEAST RNA polymerase-associated protein LEO1 OS=Saccharomyces cerevisiae (strain ATCC 204508 / S288c) GN=LEO1 PE=1 SV=1	39349	121860	206050	1136500	0.719039	0.969708	0.844374	0.198166
_DVSQIT(ph)SSPKKS(ph)FQDK_3	P38623	>sp|P38623|RCK2_YEAST Serine/threonine-protein kinase RCK2 OS=Saccharomyces cerevisiae (strain ATCC 204508 / S288c) GN=RCK2 PE=1 SV=3	829530	2525600	4887700	20916000	0.770272	0.918114	0.844193	0.180867
_FADS(ph)FKR_2	P38084	>sp|P38084|BAP2_YEAST Leu/Val/Ile amino-acid permease OS=Saccharomyces cerevisiae (strain ATCC 204508 / S288c) GN=BAP2 PE=1 SV=2	32649	62439	206300	479890	0.800629	0.885686	0.843158	0.124521
_KQTS(ph)TVAR_2	P28004	>sp|P28004|PRP45_YEAST Pre-mRNA-processing protein 45 OS=Saccharomyces cerevisiae (strain ATCC 204508 / S288c) GN=PRP45 PE=1 SV=2	21321	100090	156900	653360	0.866815	0.814762	0.840789	0.173505
_LFGS(ph)FDEQFK_2	P32909	>sp|P32909|SMY2_YEAST Protein SMY2 OS=Saccharomyces cerevisiae (strain ATCC 204508 / S288c) GN=SMY2 PE=1 SV=2	493400	913770	3124200	6885700	0.80154	0.877111	0.839325	0.117918
_TNGS(ph)YDGNGNDVK_2	P40164	>sp|P40164|PP4R3_YEAST Serine/threonine-protein phosphatase 4 regulatory subunit 3 OS=Saccharomyces cerevisiae (strain ATCC 204508 / S288c) GN=PSY2 PE=1 SV=1	27278	44639	154700	374960	0.753678	0.92427	0.838974	0.13281
_KVS(ph)S(ph)LVR_2	P08678	>sp|P08678|CYAA_YEAST Adenylate cyclase OS=Saccharomyces cerevisiae (strain ATCC 204508 / S288c) GN=CYR1 PE=1 SV=2	39109	72061	171700	780510	0.642494	1.03468	0.838586	0.191107
_KDS(ph)AQS(ph)LDDLLM_2	Q12314	>sp|Q12314|YO021_YEAST Uncharacterized protein YOR021C OS=Saccharomyces cerevisiae (strain ATCC 204508 / S288c) GN=YOR021C PE=1 SV=1	136140	86396	769600	722640	0.752279	0.922428	0.837354	0.000697937
_VQES(ph)RPGS(ph)VR_2	P20485	>sp|P20485|KICH_YEAST Choline kinase OS=Saccharomyces cerevisiae (strain ATCC 204508 / S288c) GN=CKI1 PE=1 SV=1	83567	404830	610560	2618900	0.863694	0.810846	0.83727	0.17562
_YNS(ph)HVDVGSVPSR_2	Q08269	>sp|Q08269|ALR1_YEAST Magnesium transporter ALR1 OS=Saccharomyces cerevisiae (strain ATCC 204508 / S288c) GN=ALR1 PE=1 SV=1	45295	163350	368150	946100	0.909975	0.762818	0.836396	0.125476
_FTPVNITS(ph)PNLS(ph)FQK_3	Q06685	>sp|Q06685|VIP1_YEAST Inositol hexakisphosphate and diphosphoinositol-pentakisphosphate kinase OS=Saccharomyces cerevisiae (strain ATCC 204508 / S288c) GN=VIP1 PE=1 SV=1	25595	88158	201130	525670	0.895322	0.775451	0.835387	0.128549
_SAT(ph)RS(ph)PSAFNR_3	P38427	>sp|P38427|TSL1_YEAST Trehalose synthase complex regulatory subunit TSL1 OS=Saccharomyces cerevisiae (strain ATCC 204508 / S288c) GN=TSL1 PE=1 SV=1	1377300	4141200	10237000	25888000	0.871144	0.795972	0.833558	0.126855
_RKS(ph)S(ph)TAPDEISTSTK_3	P50942	>sp|P50942|INP52_YEAST Polyphosphatidylinositol phosphatase INP52 OS=Saccharomyces cerevisiae (strain ATCC 204508 / S288c) GN=INP52 PE=1 SV=1	330570	974410	2532000	5850100	0.8842	0.778422	0.831311	0.115002
_IVQHEES(ph)LYGQR_3	P47136	>sp|P47136|BUD4_YEAST Bud site selection protein 4 OS=Saccharomyces cerevisiae (strain ATCC 204508 / S288c) GN=BUD4 PE=1 SV=2	16059	157780	200220	581930	1.09579	0.566819	0.831304	0.119612
_(ac)SQDAAIAEQTPVEHLSAVDS(ph)ASHSVLST(ph)PS(ph)NK_4	P39004;P39003	>sp|P39004|HXT7_YEAST High-affinity hexose transporter HXT6 OS=Saccharomyces cerevisiae (strain ATCC 204508 / S288c) GN=HXT7 PE=1 SV=1;>sp|P39003|HXT6_YEAST High-affinity hexose transporter HXT6 OS=Saccharomyces cerevisiae (strain ATCC 204508 / S288c) GN=H	95302	458870	483550	4154700	0.705339	0.95685	0.831095	0.216684
_NNVVTLNIS(ph)R_2	Q03833	>sp|Q03833|GIS1_YEAST Transcriptional activator/repressor GIS1 OS=Saccharomyces cerevisiae (strain ATCC 204508 / S288c) GN=GIS1 PE=1 SV=1	66927	261000	537580	1481100	0.904842	0.753944	0.829393	0.132811
_AVGAHS(ph)DLLK_2	P10664;P49626	>sp|P10664|RL4A_YEAST 60S ribosomal protein L4-A OS=Saccharomyces cerevisiae (strain ATCC 204508 / S288c) GN=RPL4A PE=1 SV=4;>sp|P49626|RL4B_YEAST 60S ribosomal protein L4-B OS=Saccharomyces cerevisiae (strain ATCC 204508 / S288c) GN=RPL4B PE=1 SV=2	252610	467220	1446400	3691100	0.757838	0.897634	0.827736	0.137114
_IPIIPTELIGTSPLFQS(ph)IQNR_3	P25588	>sp|P25588|MRC1_YEAST Mediator of replication checkpoint protein 1 OS=Saccharomyces cerevisiae (strain ATCC 204508 / S288c) GN=MRC1 PE=1 SV=3	15806	270160	350250	550910	1.34556	0.30946	0.827508	0.0277118
_(ac)S(ph)FLQNFHISPGQTIR_2	P40484	>sp|P40484|MOB1_YEAST DBF2 kinase activator protein MOB1 OS=Saccharomyces cerevisiae (strain ATCC 204508 / S288c) GN=MOB1 PE=1 SV=2	207250	408620	1335800	2864400	0.809247	0.845714	0.82748	0.112883
_KKVENVS(ph)R_2	P53883	>sp|P53883|NOP13_YEAST Nucleolar protein 13 OS=Saccharomyces cerevisiae (strain ATCC 204508 / S288c) GN=NOP13 PE=1 SV=2	575040	1554900	4004400	10028000	0.842839	0.809512	0.826176	0.127584
_CCS(ph)DVFNQVVK_3	P00330	>sp|P00330|ADH1_YEAST Alcohol dehydrogenase 1 OS=Saccharomyces cerevisiae (strain ATCC 204508 / S288c) GN=ADH1 PE=1 SV=5	30798	191780	325830	803490	1.02447	0.622177	0.823323	0.106954
_IET(ph)AEKEAYVPATK_3	P39015	>sp|P39015|STM1_YEAST Suppressor protein STM1 OS=Saccharomyces cerevisiae (strain ATCC 204508 / S288c) GN=STM1 PE=1 SV=3	38116	158650	293970	908590	0.887196	0.757928	0.822562	0.145345
_EQS(ph)FDIGTTHEVACPR_3	Q08949	>sp|Q08949|DDC1_YEAST DNA damage checkpoint protein 1 OS=Saccharomyces cerevisiae (strain ATCC 204508 / S288c) GN=DDC1 PE=1 SV=1	108040	267050	887200	1432100	0.914437	0.729381	0.821909	0.0623681
_KGNNTANATNS(ph)ANTVQK_2	P39015	>sp|P39015|STM1_YEAST Suppressor protein STM1 OS=Saccharomyces cerevisiae (strain ATCC 204508 / S288c) GN=STM1 PE=1 SV=3	115550	201810	714190	1437300	0.791044	0.852605	0.821824	0.106378
_EAESS(ph)PNTGSTEQR_2	P47068	>sp|P47068|BBC1_YEAST Myosin tail region-interacting protein MTI1 OS=Saccharomyces cerevisiae (strain ATCC 204508 / S288c) GN=BBC1 PE=1 SV=2	22445	5710400	1647900	3417600	1.86581	-0.222945	0.821433	0.446302
_IDPSSDIANLKNES(ph)K_2	P15891	>sp|P15891|ABP1_YEAST Actin-binding protein OS=Saccharomyces cerevisiae (strain ATCC 204508 / S288c) GN=ABP1 PE=1 SV=4	24209	40984	161960	268110	0.825431	0.815699	0.820565	0.0764631
_MLS(ph)CAGADR_2	P41805	>sp|P41805|RL10_YEAST 60S ribosomal protein L10 OS=Saccharomyces cerevisiae (strain ATCC 204508 / S288c) GN=RPL10 PE=1 SV=1	328200	330730	1580600	2990100	0.682683	0.956212	0.819448	0.109902
_KKS(ph)SYGSNNDDSYGSNNDDSYGSSNK_3	P18899	>sp|P18899|DDR48_YEAST Stress protein DDR48 OS=Saccharomyces cerevisiae (strain ATCC 204508 / S288c) GN=DDR48 PE=1 SV=4	103300	41561	197540	941740	0.281555	1.35525	0.8184	0.216797
_KLNMS(ph)NIR_2	P53064	>sp|P53064|RTF1_YEAST RNA polymerase-associated protein RTF1 OS=Saccharomyces cerevisiae (strain ATCC 204508 / S288c) GN=RTF1 PE=1 SV=2	54802	104610	382560	648740	0.843903	0.792497	0.8182	0.0774291
_S(ph)SGTNNKDVSQITSSPK_3	P38623	>sp|P38623|RCK2_YEAST Serine/threonine-protein kinase RCK2 OS=Saccharomyces cerevisiae (strain ATCC 204508 / S288c) GN=RCK2 PE=1 SV=3	21642	59204	152160	363820	0.847003	0.788536	0.817769	0.121147
_DVSQITS(ph)SPKK_3	P38623	>sp|P38623|RCK2_YEAST Serine/threonine-protein kinase RCK2 OS=Saccharomyces cerevisiae (strain ATCC 204508 / S288c) GN=RCK2 PE=1 SV=3	17035	1404600	909760	1135500	1.72758	-0.0923655	0.81761	0.343193
_KDS(ph)NLS(ph)SPAR_2	P38129	>sp|P38129|TAF5_YEAST Transcription initiation factor TFIID subunit 5 OS=Saccharomyces cerevisiae (strain ATCC 204508 / S288c) GN=TAF5 PE=1 SV=1	528840	170440	1005500	3846100	0.279058	1.35345	0.816253	0.208951
_GNNNNSIDDINTQPDEFNDFLNDT(ph)SNSFDTTRK_3	P38682	>sp|P38682|GLO3_YEAST ADP-ribosylation factor GTPase-activating protein GLO3 OS=Saccharomyces cerevisiae (strain ATCC 204508 / S288c) GN=GLO3 PE=1 SV=1	146420	105680	483530	1365300	0.518823	1.11124	0.815029	0.166762
_AGS(ph)SAGANKDDTK_2	Q02642	>sp|Q02642|NACB1_YEAST Nascent polypeptide-associated complex subunit beta-1 OS=Saccharomyces cerevisiae (strain ATCC 204508 / S288c) GN=EGD1 PE=1 SV=2	78658	110450	385800	959660	0.690619	0.938952	0.814785	0.139533
_SVNHS(ph)SS(ph)TLQTDDISVDK_2	P32521	>sp|P32521|PAN1_YEAST Actin cytoskeleton-regulatory complex protein PAN1 OS=Saccharomyces cerevisiae (strain ATCC 204508 / S288c) GN=PAN1 PE=1 SV=2	87464	178890	535600	1244300	0.787011	0.842339	0.814675	0.123263
_DKS(ph)MSEELK_2	P40161	>sp|P40161|RT106_YEAST Histone chaperone RTT106 OS=Saccharomyces cerevisiae (strain ATCC 204508 / S288c) GN=RTT106 PE=1 SV=1	74486	87189	458530	595320	0.789293	0.834289	0.811791	0.0439895
_LLS(ph)AETASK_2	Q08446	>sp|Q08446|SGT1_YEAST Protein SGT1 OS=Saccharomyces cerevisiae (strain ATCC 204508 / S288c) GN=SGT1 PE=1 SV=1	59389	302090	436910	1721100	0.866686	0.75567	0.811178	0.167232
_DLIDKPDDAATAETTS(ph)FGWGK_3	P53903	>sp|P53903|PGA2_YEAST Processing of GAS1 and ALP protein 2 OS=Saccharomyces cerevisiae (strain ATCC 204508 / S288c) GN=PGA2 PE=1 SV=3	198270	326470	1887300	1426900	0.978584	0.64055	0.809567	0.0661951
_(ac)M(ox)NNET(ph)SGKET(ph)ASAPLCS(ph)PK_3	P40366	>sp|P40366|DLS1_YEAST Protein DLS1 OS=Saccharomyces cerevisiae (strain ATCC 204508 / S288c) GN=DLS1 PE=1 SV=1	72348	28129	172080	487820	0.376304	1.23911	0.807705	0.181995
_HGFT(ph)GNS(ph)VNNS(ph)R_2	P40494	>sp|P40494|PRK1_YEAST Actin-regulating kinase PRK1 OS=Saccharomyces cerevisiae (strain ATCC 204508 / S288c) GN=PRK1 PE=1 SV=1	42461	140180	283900	861410	0.825175	0.788524	0.80685	0.147175
_QRS(ph)NIISSPLASTR_3	Q02606	>sp|Q02606|YP014_YEAST Uncharacterized protein YPL014W OS=Saccharomyces cerevisiae (strain ATCC 204508 / S288c) GN=YPL014W PE=1 SV=1	47802	194760	398800	952500	0.921309	0.689365	0.805337	0.11192
_APYSS(ph)NSTLNEVNKR_3	P33332	>sp|P33332|SEC3_YEAST Exocyst complex component SEC3 OS=Saccharomyces cerevisiae (strain ATCC 204508 / S288c) GN=SEC3 PE=1 SV=1	66139	2176400	1635300	3571500	1.39314	0.215112	0.804126	0.0186697
_S(ph)RS(ph)PVRR_2	P38922;P25555	>sp|P38922|HRB1_YEAST Protein HRB1 OS=Saccharomyces cerevisiae (strain ATCC 204508 / S288c) GN=HRB1 PE=1 SV=2;>sp|P25555|GBP2_YEAST Single-strand telomeric DNA-binding protein GBP2 OS=Saccharomyces cerevisiae (strain ATCC 204508 / S288c) GN=GBP2 PE=1 SV=1	161970	275680	75511	23849000	-0.331424	1.93706	0.80282	0.251167
_NRNS(ph)S(ph)SDFFSTNQGQQMPR_3	Q06681	>sp|Q06681|YSP2_YEAST GRAM domain-containing protein YSP2 OS=Saccharomyces cerevisiae (strain ATCC 204508 / S288c) GN=YSP2 PE=1 SV=1	61355	153290	497840	760970	0.90924	0.695854	0.802547	0.0517279
_QS(ph)FGQMGEPITLDLK_2	P39960	>sp|P39960|BEM2_YEAST GTPase-activating protein BEM2/IPL2 OS=Saccharomyces cerevisiae (strain ATCC 204508 / S288c) GN=BEM2 PE=1 SV=1	283640	394000	1907500	2358400	0.827697	0.777121	0.802409	0.0301187
_QS(ph)VGSFK_2	Q92331	>sp|Q92331|VPS5_YEAST Vacuolar protein sorting-associated protein 5 OS=Saccharomyces cerevisiae (strain ATCC 204508 / S288c) GN=VPS5 PE=1 SV=1	104420	715910	702510	4264700	0.827869	0.77503	0.801449	0.196854
_QT(ph)NSSLGGIGDSNAYTTINSK_3	P0C2I7;P0C2I5;Q12414;P0C2I3;P0C2I6;P0C2J1;Q07793;Q04670;Q92393;Q12316;Q12193;Q04214;Q12490	>sp|P0C2I7|YL14B_YEAST Transposon Ty1-LR4 Gag-Pol polyprotein OS=Saccharomyces cerevisiae (strain ATCC 204508 / S288c) GN=TY1B-LR4 PE=5 SV=1;>sp|P0C2I5|YL12B_YEAST Transposon Ty1-LR2 Gag-Pol polyprotein OS=Saccharomyces cerevisiae (strain ATCC 204508 / S28	173360	737270	1791800	2853600	1.01434	0.587767	0.801054	0.0421858
_(ac)S(ph)DLNDVQENAK_2	Q07528	>sp|Q07528|ATG20_YEAST Autophagy-related protein 20 OS=Saccharomyces cerevisiae (strain ATCC 204508 / S288c) GN=ATG20 PE=1 SV=1	83509	98505	365610	898720	0.641285	0.960166	0.800725	0.142116
_SNS(ph)HAS(ph)S(ph)LHSR_2	P26570	>sp|P26570|PPZ1_YEAST Serine/threonine-protein phosphatase PP-Z1 OS=Saccharomyces cerevisiae (strain ATCC 204508 / S288c) GN=PPZ1 PE=1 SV=5	50125	177550	354890	998540	0.850039	0.750045	0.800042	0.136857
_QNS(ph)QTASSSAAPDQR_2	P53924	>sp|P53924|DMA2_YEAST E3 ubiquitin-protein ligase DMA2 OS=Saccharomyces cerevisiae (strain ATCC 204508 / S288c) GN=DMA2 PE=1 SV=1	155040	375900	826170	2795700	0.726626	0.871418	0.799022	0.163882
_HCDS(ph)TLVDK_2	P43551	>sp|P43551|YFF2_YEAST Uncharacterized transcriptional regulatory protein YFL052W OS=Saccharomyces cerevisiae (strain ATCC 204508 / S288c) GN=YFL052W PE=3 SV=1	28686	105200	202030	584970	0.847746	0.745118	0.796432	0.139638
_EYIS(ph)SEALK_2	P38772	>sp|P38772|BCD1_YEAST Box C/D snoRNA protein 1 OS=Saccharomyces cerevisiae (strain ATCC 204508 / S288c) GN=BCD1 PE=1 SV=1	41566	70529	198710	575950	0.679481	0.912017	0.795749	0.154048
_VS(ph)S(ph)KSETFFTGNPK_2	P34226	>sp|P34226|SKT5_YEAST Protein SKT5 OS=Saccharomyces cerevisiae (strain ATCC 204508 / S288c) GN=SKT5 PE=1 SV=1	22662	981200	585640	1480600	1.41233	0.17868	0.795506	0.0190266
_SLS(ph)TSLAHLSIK_2	P53604	>sp|P53604|MSO1_YEAST Protein MSO1 OS=Saccharomyces cerevisiae (strain ATCC 204508 / S288c) GN=MSO1 PE=1 SV=1	8531.1	115890	159310	241880	1.27124	0.319554	0.795396	0.0284337
_ES(ph)S(ph)RSPIALNYEAR_3	P39956	>sp|P39956|RPH1_YEAST DNA damage-responsive transcriptional repressor RPH1 OS=Saccharomyces cerevisiae (strain ATCC 204508 / S288c) GN=RPH1 PE=1 SV=1	151550	377110	878010	2531300	0.762944	0.826876	0.79491	0.146468
_LYHNPSLPAQS(ph)IQDT(ph)RDDELLER_4	P36035	>sp|P36035|JEN1_YEAST Carboxylic acid transporter protein homolog OS=Saccharomyces cerevisiae (strain ATCC 204508 / S288c) GN=JEN1 PE=1 SV=1	83740	810960	814920	3218700	0.988182	0.598681	0.793432	0.156153
_IMQLQNS(ph)ESTLKNEIK_3	P37304	>sp|P37304|PAM1_YEAST Protein PAM1 OS=Saccharomyces cerevisiae (strain ATCC 204508 / S288c) GN=PAM1 PE=1 SV=2	50431	64446	304730	410720	0.781218	0.80435	0.792784	0.0483719
_LALS(ph)TSFIAHDPPSK_3	Q02256	>sp|Q02256|PVH1_YEAST Tyrosine-protein phosphatase YVH1 OS=Saccharomyces cerevisiae (strain ATCC 204508 / S288c) GN=YVH1 PE=1 SV=1	19143	49790	111710	327960	0.766082	0.818679	0.79238	0.147745
_DKEFTGS(ph)QDDGEDEYDLDK_3	P53725	>sp|P53725|MPP6_YEAST M-phase phosphoprotein 6 homolog OS=Saccharomyces cerevisiae (strain ATCC 204508 / S288c) GN=MPP6 PE=1 SV=1	3360400	109350	2334000	6046700	-0.15829	1.7427	0.792205	0.304488
_YLEENDKDLLDFAGTNPLDGIDS(ph)QDEGEDAERNS(ph)NIEEK_4	P39744	>sp|P39744|NOC2_YEAST Nucleolar complex protein 2 OS=Saccharomyces cerevisiae (strain ATCC 204508 / S288c) GN=NOC2 PE=1 SV=2	112700	13674000	4951000	11925000	1.64277	-0.0594372	0.791666	0.360414
_NNS(ph)ISSQPASYHSVQETNK_3	P38931	>sp|P38931|SSN2_YEAST Mediator of RNA polymerase II transcription subunit 13 OS=Saccharomyces cerevisiae (strain ATCC 204508 / S288c) GN=SSN2 PE=1 SV=2	62662	41442	159700	621010	0.406301	1.17566	0.790979	0.197195
_VISQPIELHKLS(ph)IVDK_3	P47129	>sp|P47129|ACF4_YEAST Assembly-complementing factor 4 OS=Saccharomyces cerevisiae (strain ATCC 204508 / S288c) GN=ACF4 PE=1 SV=1	26918	114750	186240	629790	0.84003	0.739443	0.789737	0.154506
_(ac)AELSEQVQNLS(ph)INDNNENGYVPPHLR_3	P06634	>sp|P06634|DED1_YEAST ATP-dependent RNA helicase DED1 OS=Saccharomyces cerevisiae (strain ATCC 204508 / S288c) GN=DED1 PE=1 SV=2	108270	143390	532120	1097600	0.691501	0.883925	0.787713	0.116943
_FTPVNITS(ph)PNLS(ph)FQK_2	Q06685	>sp|Q06685|VIP1_YEAST Inositol hexakisphosphate and diphosphoinositol-pentakisphosphate kinase OS=Saccharomyces cerevisiae (strain ATCC 204508 / S288c) GN=VIP1 PE=1 SV=1	296130	490290	1386900	3937100	0.670563	0.904723	0.787643	0.152442
_SLQATS(ph)SILGESAPQLQR_2	P40466	>sp|P40466|FKH1_YEAST Fork head protein homolog 1 OS=Saccharomyces cerevisiae (strain ATCC 204508 / S288c) GN=FKH1 PE=1 SV=1	81494	285930	553530	1582700	0.832016	0.743139	0.787577	0.138878
_(ac)S(ph)FTAPSDPVNKPTK_2	P53088	>sp|P53088|CTU1_YEAST Cytoplasmic tRNA 2-thiolation protein 1 OS=Saccharomyces cerevisiae (strain ATCC 204508 / S288c) GN=NCS6 PE=1 SV=3	215860	596720	1311000	3680900	0.783431	0.790183	0.786807	0.141394
_AGLS(ph)FDNYQR_2	P25043	>sp|P25043|PSB2_YEAST Proteasome subunit beta type-2 OS=Saccharomyces cerevisiae (strain ATCC 204508 / S288c) GN=PUP1 PE=1 SV=1	28534	50008	136990	390120	0.681326	0.892159	0.786742	0.151741
_NNS(ph)LILSRPNLGIIR_3	Q08202	>sp|Q08202|OPI10_YEAST Protein OPI10 OS=Saccharomyces cerevisiae (strain ATCC 204508 / S288c) GN=OPI10 PE=1 SV=1	275770	262520	1099100	2462900	0.60049	0.972284	0.786387	0.13603
_DFSEDLNS(ph)FDKQNAK_3	Q04773	>sp|Q04773|YMW4_YEAST Uncharacterized protein YMR074C OS=Saccharomyces cerevisiae (strain ATCC 204508 / S288c) GN=YMR074C PE=1 SV=1	373470	654930	1594100	5726500	0.63026	0.941694	0.785977	0.174819
_DLTFEKS(ph)VNEK_2	Q03661	>sp|Q03661|ESC1_YEAST Silent chromatin protein ESC1 OS=Saccharomyces cerevisiae (strain ATCC 204508 / S288c) GN=ESC1 PE=1 SV=1	60936	113910	333810	771320	0.738625	0.830673	0.784649	0.124766
_NHSDSIS(ph)AS(ph)SLPK_2	P38970	>sp|P38970|HAL5_YEAST Serine/threonine-protein kinase HAL5 OS=Saccharomyces cerevisiae (strain ATCC 204508 / S288c) GN=HAL5 PE=1 SV=2	20763	250270	314480	612250	1.1803	0.38852	0.784411	0.0330195
_NVS(ph)DATIK_2	P39523	>sp|P39523|YM11_YEAST Uncharacterized protein YMR124W OS=Saccharomyces cerevisiae (strain ATCC 204508 / S288c) GN=YMR124W PE=1 SV=2	451280	30728	345470	1485800	-0.116036	1.68443	0.784195	0.273106
_(ac)S(ph)FFGLENSGNAR_2	P25644	>sp|P25644|PAT1_YEAST DNA topoisomerase 2-associated protein PAT1 OS=Saccharomyces cerevisiae (strain ATCC 204508 / S288c) GN=PAT1 PE=1 SV=4	93578	275080	709360	1340100	0.879693	0.687678	0.783686	0.0831334
_NIKS(ph)VTNQNVK_2	Q03323	>sp|Q03323|SDC1_YEAST COMPASS component SDC1 OS=Saccharomyces cerevisiae (strain ATCC 204508 / S288c) GN=SDC1 PE=1 SV=1	28051	59687	149490	413340	0.726664	0.840428	0.783546	0.144713
_MAS(ph)AITQQR_2	P06782	>sp|P06782|SNF1_YEAST Carbon catabolite-derepressing protein kinase OS=Saccharomyces cerevisiae (strain ATCC 204508 / S288c) GN=SNF1 PE=1 SV=1	54846	190510	469100	821920	0.93212	0.634912	0.783516	0.0651779
_SAGTQSS(ph)KFSK_2	P04449	>sp|P04449|RL24A_YEAST 60S ribosomal protein L24-A OS=Saccharomyces cerevisiae (strain ATCC 204508 / S288c) GN=RPL24A PE=1 SV=1	106350	127500	453700	1101900	0.630031	0.936632	0.783332	0.141
_SLS(ph)NIDELYSLR_2	Q03201	>sp|Q03201|RT10_YEAST 37S ribosomal protein S10, mitochondrial OS=Saccharomyces cerevisiae (strain ATCC 204508 / S288c) GN=RSM10 PE=1 SV=1	54687	119040	312400	767890	0.756827	0.809606	0.783217	0.129654
_NDS(ph)FNINTDTLK_2	Q08581	>sp|Q08581|SLK19_YEAST Kinetochore protein SLK19 OS=Saccharomyces cerevisiae (strain ATCC 204508 / S288c) GN=SLK19 PE=1 SV=1	688750	1822600	4623500	9979900	0.826909	0.738435	0.782672	0.10694
_VLQQS(ph)ISEIEQLLSK_2	P05626	>sp|P05626|ATPF_YEAST ATP synthase subunit 4, mitochondrial OS=Saccharomyces cerevisiae (strain ATCC 204508 / S288c) GN=ATP4 PE=1 SV=2	89400	50615	472970	350820	0.723496	0.840805	0.782151	0.0386174
_LGTVPSNYVS(ph)S(ph)PDLVR_3	P48415	>sp|P48415|SEC16_YEAST COPII coat assembly protein SEC16 OS=Saccharomyces cerevisiae (strain ATCC 204508 / S288c) GN=SEC16 PE=1 SV=2	24217	45543	136660	295540	0.751521	0.812195	0.781858	0.11546
_TVASAVEVSKES(ph)QK_2	P25357	>sp|P25357|SNT1_YEAST Probable DNA-binding protein SNT1 OS=Saccharomyces cerevisiae (strain ATCC 204508 / S288c) GN=SNT1 PE=1 SV=2	25578	118450	141000	781820	0.741353	0.819572	0.780462	0.195165
_S(ph)LVNYTATILDLTEEEKR_3	Q04336	>sp|Q04336|YM54_YEAST Uncharacterized protein YMR196W OS=Saccharomyces cerevisiae (strain ATCC 204508 / S288c) GN=YMR196W PE=1 SV=1	171630	908130	1814200	3107300	1.02409	0.534235	0.779164	0.0457988
_(ac)S(ph)EENLRPAYDDQVNEDVYK_3	Q12211	>sp|Q12211|PUS1_YEAST tRNA pseudouridine synthase 1 OS=Saccharomyces cerevisiae (strain ATCC 204508 / S288c) GN=PUS1 PE=1 SV=1	399280	1242500	2280300	7867300	0.756714	0.801529	0.779122	0.161938
_S(ph)QSS(ph)IADNNGSPVK_2	P47035	>sp|P47035|NET1_YEAST Nucleolar protein NET1 OS=Saccharomyces cerevisiae (strain ATCC 204508 / S288c) GN=NET1 PE=1 SV=1	21416	295600	230570	989500	1.03206	0.524711	0.778388	0.156812
_KYS(ph)LNSGANISK_2	Q02100	>sp|Q02100|SKO1_YEAST CRE-binding bZIP protein SKO1 OS=Saccharomyces cerevisiae (strain ATCC 204508 / S288c) GN=SKO1 PE=1 SV=1	51406	114260	238810	885920	0.667039	0.8895	0.778269	0.174164
_LTS(ph)IEDK_2	P33328;P31109	>sp|P33328|SNC2_YEAST Synaptobrevin homolog 2 OS=Saccharomyces cerevisiae (strain ATCC 204508 / S288c) GN=SNC2 PE=1 SV=2;>sp|P31109|SNC1_YEAST Synaptobrevin homolog 1 OS=Saccharomyces cerevisiae (strain ATCC 204508 / S288c) GN=SNC1 PE=1 SV=1	557760	294320	1117300	5264700	0.301722	1.25255	0.777138	0.214317
_VGKGDDEANGAT(ph)SFDR_3	P14126	>sp|P14126|RL3_YEAST 60S ribosomal protein L3 OS=Saccharomyces cerevisiae (strain ATCC 204508 / S288c) GN=RPL3 PE=1 SV=4	273040	430880	1208000	3487400	0.645841	0.908145	0.776993	0.155509
_(ac)ALAIS(ph)HEDTQILLK_2	Q03862	>sp|Q03862|ARX1_YEAST Probable metalloprotease ARX1 OS=Saccharomyces cerevisiae (strain ATCC 204508 / S288c) GN=ARX1 PE=1 SV=1	116260	273730	641270	1771700	0.741611	0.811068	0.776339	0.142697
_AGSGTSQLDQLAALQALSSS(ph)LNK_3	Q99383	>sp|Q99383|HRP1_YEAST Nuclear polyadenylated RNA-binding protein 4 OS=Saccharomyces cerevisiae (strain ATCC 204508 / S288c) GN=HRP1 PE=1 SV=1	970640	3900600	7320500	18457000	0.877483	0.67503	0.776256	0.119067
_S(ph)ASFDNNNVNGNGNNTNR_3	P40494	>sp|P40494|PRK1_YEAST Actin-regulating kinase PRK1 OS=Saccharomyces cerevisiae (strain ATCC 204508 / S288c) GN=PRK1 PE=1 SV=1	70807	94347	247270	961000	0.543095	1.008	0.775545	0.186062
_AYS(ph)GDISAADDNLNPFER_2	P38266	>sp|P38266|AIM3_YEAST Altered inheritance of mitochondria protein 3 OS=Saccharomyces cerevisiae (strain ATCC 204508 / S288c) GN=AIM3 PE=1 SV=3	410960	1196300	2531800	6890500	0.78963	0.760411	0.77502	0.13651
_ECS(ph)NPTCGAGVFLANHK_3	P05759	>sp|P05759|RS27A_YEAST Ubiquitin-40S ribosomal protein S31 OS=Saccharomyces cerevisiae (strain ATCC 204508 / S288c) GN=RPS31 PE=1 SV=3	3435300	5113900	14016000	44408000	0.610659	0.938709	0.774684	0.166275
_S(ph)ALDVGEHS(ph)DSS(ph)DIEVDHTK_3	P27344	>sp|P27344|DPB3_YEAST DNA polymerase epsilon subunit C OS=Saccharomyces cerevisiae (strain ATCC 204508 / S288c) GN=DPB3 PE=1 SV=2	58108	612410	553840	2252500	0.979148	0.565623	0.772385	0.156567
_IDQEDS(ph)FNDVRPDSSYNTTSSNSVIK_3	P40210	>sp|P40210|SIP5_YEAST Protein SIP5 OS=Saccharomyces cerevisiae (strain ATCC 204508 / S288c) GN=SIP5 PE=1 SV=1	142310	247680	622590	1980800	0.640967	0.90295	0.771958	0.16395
_VAS(ph)QLGQK_2	P32263	>sp|P32263|P5CR_YEAST Pyrroline-5-carboxylate reductase OS=Saccharomyces cerevisiae (strain ATCC 204508 / S288c) GN=PRO3 PE=1 SV=1	99685	211780	430800	1703000	0.635646	0.90533	0.770488	0.18045
_DDM(ox)DGQEDS(ph)FNKDTNVVK_3	Q02100	>sp|Q02100|SKO1_YEAST CRE-binding bZIP protein SKO1 OS=Saccharomyces cerevisiae (strain ATCC 204508 / S288c) GN=SKO1 PE=1 SV=1	36103	262980	159680	2060400	0.645707	0.894029	0.769868	0.22815
_VKS(ph)APVIAPAK_2	P36145	>sp|P36145|T2EB_YEAST Transcription initiation factor IIE subunit beta OS=Saccharomyces cerevisiae (strain ATCC 204508 / S288c) GN=TFA2 PE=1 SV=3	92863	227480	467110	1560800	0.701576	0.836404	0.76899	0.162896
_QHVSST(ph)AS(ph)ITSGGHNDLVQIEQPQK_3	P11938	>sp|P11938|RAP1_YEAST DNA-binding protein RAP1 OS=Saccharomyces cerevisiae (strain ATCC 204508 / S288c) GN=RAP1 PE=1 SV=2	148510	225920	879900	1315900	0.772678	0.765268	0.768973	0.0618772
_(ac)SQDAAIAEQTPVEHLS(ph)AVDSAS(ph)HS(ph)VLS(ph)TPS(ph)NKAER_4	P39004;P39003	>sp|P39004|HXT7_YEAST High-affinity hexose transporter HXT6 OS=Saccharomyces cerevisiae (strain ATCC 204508 / S288c) GN=HXT7 PE=1 SV=1;>sp|P39003|HXT6_YEAST High-affinity hexose transporter HXT6 OS=Saccharomyces cerevisiae (strain ATCC 204508 / S288c) GN=H	728650	5069400	7580100	16759000	1.01716	0.519292	0.768224	0.0812488
_DRS(ph)LTNK_2	P34167	>sp|P34167|IF4B_YEAST Eukaryotic translation initiation factor 4B OS=Saccharomyces cerevisiae (strain ATCC 204508 / S288c) GN=TIF3 PE=1 SV=1	70745	305500	510040	1452600	0.857908	0.677135	0.767522	0.133584
_S(ph)VEEVIER_2	P38883	>sp|P38883|RIX1_YEAST Pre-rRNA-processing protein RIX1 OS=Saccharomyces cerevisiae (strain ATCC 204508 / S288c) GN=RIX1 PE=1 SV=2	37150	77669	175560	562590	0.674467	0.859944	0.767206	0.161499
_FVDDS(ph)DT(ph)SYEEKEK_3	Q08951	>sp|Q08951|AP3D_YEAST AP-3 complex subunit delta OS=Saccharomyces cerevisiae (strain ATCC 204508 / S288c) GN=APL5 PE=1 SV=1	18332	1613300	464460	2177700	1.40374	0.130283	0.767011	0.0370862
_FNIGDS(ph)NS(ph)SLSSSGSSLK_2	P38758	>sp|P38758|TDA3_YEAST Putative oxidoreductase TDA3 OS=Saccharomyces cerevisiae (strain ATCC 204508 / S288c) GN=TDA3 PE=1 SV=2	41870	176230	290840	862050	0.841751	0.689453	0.765602	0.139155
_(ac)S(ph)FNAFASSLSK_2	P40531	>sp|P40531|GVP36_YEAST Protein GVP36 OS=Saccharomyces cerevisiae (strain ATCC 204508 / S288c) GN=GVP36 PE=1 SV=1	208320	326100	1121300	2045500	0.730991	0.797449	0.76422	0.0946236
_EALQNS(ph)FILVK_2	Q12341	>sp|Q12341|HAT1_YEAST Histone acetyltransferase type B catalytic subunit OS=Saccharomyces cerevisiae (strain ATCC 204508 / S288c) GN=HAT1 PE=1 SV=1	19994	40477	111550	244800	0.74657	0.781603	0.764086	0.115906
_SS(ph)SNS(ph)SVTS(ph)TGQSSR_2	Q08422	>sp|Q08422|YO052_YEAST AN1-type zinc finger protein YOR052C OS=Saccharomyces cerevisiae (strain ATCC 204508 / S288c) GN=YOR052C PE=1 SV=1	126290	193120	478310	1718100	0.57834	0.949221	0.763781	0.177788
_LNDNSNNSGS(ph)DTVDPLAGLNNLR_3	P50896	>sp|P50896|PSP1_YEAST Protein PSP1 OS=Saccharomyces cerevisiae (strain ATCC 204508 / S288c) GN=PSP1 PE=1 SV=2	22889	70812	143300	379180	0.796619	0.728739	0.762679	0.131502
_ASS(ph)LAQDSK_2	P34228	>sp|P34228|SEF1_YEAST Putative transcription factor SEF1 OS=Saccharomyces cerevisiae (strain ATCC 204508 / S288c) GN=SEF1 PE=1 SV=4	41037	97772	181270	730400	0.64515	0.873346	0.759248	0.180564
_EKS(ph)NS(ph)PTSFFDGSASSTPIPVLGK_3	P20676	>sp|P20676|NUP1_YEAST Nucleoporin NUP1 OS=Saccharomyces cerevisiae (strain ATCC 204508 / S288c) GN=NUP1 PE=1 SV=1	90813	124380	359440	1035300	0.597478	0.920316	0.758897	0.158719
_VSDDS(ph)ESESGDKEATAPLIQR_3	Q08723	>sp|Q08723|RPN8_YEAST 26S proteasome regulatory subunit RPN8 OS=Saccharomyces cerevisiae (strain ATCC 204508 / S288c) GN=RPN8 PE=1 SV=3	40536000	972510	24325000	52436000	-0.221788	1.73174	0.754974	0.347136
_(ac)TDETAHPTQS(ph)ASK_2	P39935	>sp|P39935|IF4F1_YEAST Eukaryotic initiation factor 4F subunit p150 OS=Saccharomyces cerevisiae (strain ATCC 204508 / S288c) GN=TIF4631 PE=1 SV=2	27551	93649	144020	578310	0.718285	0.790658	0.754471	0.17493
_MRS(ph)HT(ph)NSASDLDSVSPVEQLR_3	P38758	>sp|P38758|TDA3_YEAST Putative oxidoreductase TDA3 OS=Saccharomyces cerevisiae (strain ATCC 204508 / S288c) GN=TDA3 PE=1 SV=2	96191	845840	1248100	2100400	1.11311	0.395014	0.754064	0.0135697
_HSDS(ph)YSENETNHTNVPISSTGGTNNK_3	Q03612;P0C2I7;P0C2I5;Q12414;P0C2I3;Q12273;P47098;Q03434;Q07793;Q04670;Q92393;O13527	>sp|Q03612|YE11B_YEAST Transposon Ty1-ER1 Gag-Pol polyprotein OS=Saccharomyces cerevisiae (strain ATCC 204508 / S288c) GN=TY1B-ER1 PE=3 SV=1;>sp|P0C2I7|YL14B_YEAST Transposon Ty1-LR4 Gag-Pol polyprotein OS=Saccharomyces cerevisiae (strain ATCC 204508 / S28	470040	1756000	3280700	8103100	0.843832	0.664127	0.753979	0.117306
_LAPT(ph)NSGGS(ph)GGKLDDPSGAS(ph)SYYASHR_3	P43603	>sp|P43603|LSB3_YEAST LAS seventeen-binding protein 3 OS=Saccharomyces cerevisiae (strain ATCC 204508 / S288c) GN=LSB3 PE=1 SV=3	73266	218190	407740	1258900	0.745481	0.761156	0.753319	0.151017
_LTGRDS(ph)S(ph)TNILIR_3	P47134	>sp|P47134|BIR1_YEAST Protein BIR1 OS=Saccharomyces cerevisiae (strain ATCC 204508 / S288c) GN=BIR1 PE=1 SV=1	100520	262260	658330	1283200	0.816191	0.689562	0.752877	0.0908287
_VENVS(ph)RNNSSS(ph)FDISNNK_2	P53883	>sp|P53883|NOP13_YEAST Nucleolar protein 13 OS=Saccharomyces cerevisiae (strain ATCC 204508 / S288c) GN=NOP13 PE=1 SV=2	21251	42680	121560	238890	0.757411	0.747974	0.752692	0.0995688
_KNS(ph)ATTNLPSEER_3	P40917	>sp|P40917|YAP4_YEAST AP-1-like transcription factor YAP4 OS=Saccharomyces cerevisiae (strain ATCC 204508 / S288c) GN=CIN5 PE=1 SV=1	131660	410710	811490	2129700	0.789829	0.714783	0.752306	0.130123
_VS(ph)SDSFTVATPLSLQSTTTR_2	Q12221	>sp|Q12221|PUF2_YEAST mRNA-binding protein PUF2 OS=Saccharomyces cerevisiae (strain ATCC 204508 / S288c) GN=PUF2 PE=1 SV=1	199430	51196	343090	943660	0.235618	1.26558	0.750599	0.199197
_TSS(ph)SMS(ph)VGNNKK_3	P38426	>sp|P38426|TPS3_YEAST Trehalose synthase complex regulatory subunit TPS3 OS=Saccharomyces cerevisiae (strain ATCC 204508 / S288c) GN=TPS3 PE=1 SV=3	424890	956580	3282800	3920500	0.887968	0.61262	0.750294	0.00579548
_KDSDSSKPAFS(ph)FGTK_3	P14907	>sp|P14907|NSP1_YEAST Nucleoporin NSP1 OS=Saccharomyces cerevisiae (strain ATCC 204508 / S288c) GN=NSP1 PE=1 SV=1	49329	62103	231240	416920	0.670961	0.82694	0.74895	0.0992014
_KNS(ph)ATTNLPSEER_2	P40917	>sp|P40917|YAP4_YEAST AP-1-like transcription factor YAP4 OS=Saccharomyces cerevisiae (strain ATCC 204508 / S288c) GN=CIN5 PE=1 SV=1	182070	430850	942280	2610700	0.713942	0.782431	0.748186	0.143189
_S(ph)GSQEEASPSSIQS(ph)ETETVTTK_3	P43579	>sp|P43579|IES1_YEAST Ino eighty subunit 1 OS=Saccharomyces cerevisiae (strain ATCC 204508 / S288c) GN=IES1 PE=1 SV=1	29797	79047	150350	490500	0.702931	0.792754	0.747842	0.159276
_SGPS(ph)NLNQFQGR_2	Q12743	>sp|Q12743|DFM1_YEAST DER1-like family member protein 1 OS=Saccharomyces cerevisiae (strain ATCC 204508 / S288c) GN=DFM1 PE=1 SV=1	31818	133540	204460	647600	0.807935	0.685695	0.746815	0.146866
_LLEYDNIEGM(ox)ILLSELS(ph)R_2	P20459	>sp|P20459|IF2A_YEAST Eukaryotic translation initiation factor 2 subunit alpha OS=Saccharomyces cerevisiae (strain ATCC 204508 / S288c) GN=SUI2 PE=1 SV=1	28288	216070	219720	865210	0.890267	0.602527	0.746397	0.158718
_(ac)SQLFNNS(ph)RSDTLFLGGEK_3	P12612	>sp|P12612|TCPA_YEAST T-complex protein 1 subunit alpha OS=Saccharomyces cerevisiae (strain ATCC 204508 / S288c) GN=TCP1 PE=1 SV=2	28100	37774	138920	237420	0.694058	0.798324	0.746191	0.0887006
_REQS(ph)VNETGR_2	P32567	>sp|P32567|PAH1_YEAST Phosphatidic acid phosphohydrolase 1 OS=Saccharomyces cerevisiae (strain ATCC 204508 / S288c) GN=PAH1 PE=1 SV=1	52981	107410	274660	642380	0.714675	0.776747	0.745711	0.124956
_TGSDTS(ph)IRK_2	P34226	>sp|P34226|SKT5_YEAST Protein SKT5 OS=Saccharomyces cerevisiae (strain ATCC 204508 / S288c) GN=SKT5 PE=1 SV=1	787330	36801	760880	1174600	-0.0148406	1.50403	0.744595	0.257398
_LVSQDS(ph)ASPLSLTFR_3	P53250	>sp|P53250|TWF1_YEAST Twinfilin-1 OS=Saccharomyces cerevisiae (strain ATCC 204508 / S288c) GN=TWF1 PE=1 SV=1	41094	127690	243130	663000	0.77206	0.715357	0.743708	0.135125
_TSS(ph)NNELKGPEDLAR_3	Q12420	>sp|Q12420|SNU66_YEAST 66 kDa U4/U6.U5 small nuclear ribonucleoprotein component OS=Saccharomyces cerevisiae (strain ATCC 204508 / S288c) GN=SNU66 PE=1 SV=1	81760	177840	408350	1085600	0.698492	0.78564	0.742066	0.140069
_TES(ph)DVFDR_2	P34216	>sp|P34216|EDE1_YEAST EH domain-containing and endocytosis protein 1 OS=Saccharomyces cerevisiae (strain ATCC 204508 / S288c) GN=EDE1 PE=1 SV=2	321320	957570	1490000	6282100	0.666249	0.816934	0.741591	0.181225
_EFDLDGLFS(ph)SLDK_2	P40010	>sp|P40010|NUG1_YEAST Nuclear GTP-binding protein NUG1 OS=Saccharomyces cerevisiae (strain ATCC 204508 / S288c) GN=NUG1 PE=1 SV=1	73702	198290	490180	905710	0.822876	0.659688	0.741282	0.0806305
_SES(ph)VLKDPSQK_3	Q02555	>sp|Q02555|RNT1_YEAST Ribonuclease 3 OS=Saccharomyces cerevisiae (strain ATCC 204508 / S288c) GN=RNT1 PE=1 SV=1	144280	431930	828150	2285400	0.758903	0.723549	0.741226	0.137487
_AIS(ph)LVENDDETR_2	P53552	>sp|P53552|THO2_YEAST THO complex subunit 2 OS=Saccharomyces cerevisiae (strain ATCC 204508 / S288c) GN=THO2 PE=1 SV=1	35268	135250	234990	615890	0.823669	0.658366	0.741017	0.124642
_S(ph)PDNKVPK_3	P36517	>sp|P36517|RM04_YEAST 54S ribosomal protein L4, mitochondrial OS=Saccharomyces cerevisiae (strain ATCC 204508 / S288c) GN=MRPL4 PE=1 SV=2	1643200	8006100	9033400	43952000	0.740161	0.739558	0.739859	0.185457
_DM(ox)GDVGST(ph)TS(ph)FKEEEKPK_3	P43597	>sp|P43597|YFI6_YEAST Uncharacterized protein YFR016C OS=Saccharomyces cerevisiae (strain ATCC 204508 / S288c) GN=YFR016C PE=1 SV=1	46077	362870	229940	2191400	0.69813	0.780971	0.73955	0.2181
_S(ph)QHS(ph)SIGDLKR_3	P22211	>sp|P22211|NPR1_YEAST Nitrogen permease reactivator protein OS=Saccharomyces cerevisiae (strain ATCC 204508 / S288c) GN=NPR1 PE=1 SV=2	65292	5417500	2301000	4622700	1.54706	-0.0689032	0.739077	0.358725
_RLSS(ph)QNVNYDLK_2	Q04779	>sp|Q04779|RCO1_YEAST Transcriptional regulatory protein RCO1 OS=Saccharomyces cerevisiae (strain ATCC 204508 / S288c) GN=RCO1 PE=1 SV=1	23118	93976	149950	434830	0.811996	0.665303	0.738649	0.13661
_SPNAVYSPGES(ph)PLNT(ph)VQLFNR_3	P53599	>sp|P53599|SSK2_YEAST MAP kinase kinase kinase SSK2 OS=Saccharomyces cerevisiae (strain ATCC 204508 / S288c) GN=SSK2 PE=1 SV=1	99060	201620	456220	1311400	0.663276	0.813202	0.738239	0.150891
_SLS(ph)SVLK_2	Q00416	>sp|Q00416|SEN1_YEAST Helicase SEN1 OS=Saccharomyces cerevisiae (strain ATCC 204508 / S288c) GN=SEN1 PE=1 SV=2	46645	198760	337000	821160	0.858825	0.616099	0.737462	0.111059
_VHS(ph)LNKK_2	P47019	>sp|P47019|ALB1_YEAST Ribosome biogenesis protein ALB1 OS=Saccharomyces cerevisiae (strain ATCC 204508 / S288c) GN=ALB1 PE=1 SV=1	388280	12359	415940	343760	0.0298857	1.44427	0.737079	0.223494
_YNS(ph)HVDVGSVPSR_3	Q08269	>sp|Q08269|ALR1_YEAST Magnesium transporter ALR1 OS=Saccharomyces cerevisiae (strain ATCC 204508 / S288c) GN=ALR1 PE=1 SV=1	104460	280740	585800	1488400	0.748799	0.724415	0.736607	0.129273
_RECS(ph)NPTCGAGVFLANHK_3	P05759	>sp|P05759|RS27A_YEAST Ubiquitin-40S ribosomal protein S31 OS=Saccharomyces cerevisiae (strain ATCC 204508 / S288c) GN=RPS31 PE=1 SV=3	342230	508990	1517000	3405300	0.646668	0.825446	0.736057	0.127345
_LENMNNS(ph)SHNLLS(ph)HPSVPK_3	P53236	>sp|P53236|RSC1_YEAST Chromatin structure-remodeling complex subunit RSC1 OS=Saccharomyces cerevisiae (strain ATCC 204508 / S288c) GN=RSC1 PE=1 SV=1	25528	409390	496130	624220	1.28858	0.1832	0.73589	0.113685
_FS(ph)FNDPFGLETISQR_2	Q07655	>sp|Q07655|WHI4_YEAST Protein WHI4 OS=Saccharomyces cerevisiae (strain ATCC 204508 / S288c) GN=WHI4 PE=1 SV=1	36388	300320	316120	1022800	0.938894	0.532206	0.73555	0.132414
_TSS(ph)SMS(ph)VGNNK_2	P38426	>sp|P38426|TPS3_YEAST Trehalose synthase complex regulatory subunit TPS3 OS=Saccharomyces cerevisiae (strain ATCC 204508 / S288c) GN=TPS3 PE=1 SV=3	112130	306810	793490	1280600	0.84982	0.620544	0.735182	0.0556642
_DAMM(ox)S(ph)APGS(ph)R_2	P06634	>sp|P06634|DED1_YEAST ATP-dependent RNA helicase DED1 OS=Saccharomyces cerevisiae (strain ATCC 204508 / S288c) GN=DED1 PE=1 SV=2	84666	1657400	624770	6625900	0.868011	0.601818	0.734914	0.215533
_KRS(ph)SSELEK_2	P38779	>sp|P38779|CIC1_YEAST Proteasome-interacting protein CIC1 OS=Saccharomyces cerevisiae (strain ATCC 204508 / S288c) GN=CIC1 PE=1 SV=1	29905	401590	404160	876480	1.13081	0.338959	0.734884	0.0375488
_DSMLDSS(ph)LNKSR_3	P21538	>sp|P21538|REB1_YEAST DNA-binding protein REB1 OS=Saccharomyces cerevisiae (strain ATCC 204508 / S288c) GN=REB1 PE=1 SV=2	50027	102790	362770	417640	0.860427	0.608851	0.734639	0.00106865
_NIVLFPEPEES(ph)FSRPQS(ph)AQSQSR_3	P07278	>sp|P07278|KAPR_YEAST cAMP-dependent protein kinase regulatory subunit OS=Saccharomyces cerevisiae (strain ATCC 204508 / S288c) GN=BCY1 PE=1 SV=4	2380500	89363	813630	7672400	-0.466241	1.93377	0.733766	0.314859
_DAM(ox)M(ox)S(ph)APGS(ph)R_2	P06634	>sp|P06634|DED1_YEAST ATP-dependent RNA helicase DED1 OS=Saccharomyces cerevisiae (strain ATCC 204508 / S288c) GN=DED1 PE=1 SV=2	53239	1161000	338120	5362400	0.802841	0.664527	0.733684	0.22845
_(ac)SATS(ph)SSGDVKK_2	Q05949	>sp|Q05949|BUR2_YEAST Protein BUR2 OS=Saccharomyces cerevisiae (strain ATCC 204508 / S288c) GN=BUR2 PE=1 SV=1	22077	115330	158980	467030	0.857402	0.607402	0.732402	0.131839
_SM(ox)S(ph)SENITVPR_2	P17121	>sp|P17121|SAC7_YEAST GTPase-activating protein SAC7 OS=Saccharomyces cerevisiae (strain ATCC 204508 / S288c) GN=SAC7 PE=1 SV=2	16056	840140	176500	2223100	1.04111	0.422607	0.731857	0.213236
_S(ph)VYDVLR_2	P34167	>sp|P34167|IF4B_YEAST Eukaryotic translation initiation factor 4B OS=Saccharomyces cerevisiae (strain ATCC 204508 / S288c) GN=TIF3 PE=1 SV=1	20201	141020	202380	408850	1.00079	0.462283	0.731539	0.0598684
_KLASS(ph)GEVDKIES(ph)PR_3	P23201	>sp|P23201|SPA2_YEAST Protein SPA2 OS=Saccharomyces cerevisiae (strain ATCC 204508 / S288c) GN=SPA2 PE=1 SV=1	177000	399000	840310	2438500	0.676466	0.78615	0.731308	0.14991
_AVS(ph)EDPR_2	P32527	>sp|P32527|ZUO1_YEAST Zuotin OS=Saccharomyces cerevisiae (strain ATCC 204508 / S288c) GN=ZUO1 PE=1 SV=1	170380	203480	869650	1155400	0.707926	0.754211	0.731068	0.04833
_S(ph)QSEREEEWLEK_2	P40007	>sp|P40007|NOP16_YEAST Nucleolar protein 16 OS=Saccharomyces cerevisiae (strain ATCC 204508 / S288c) GN=NOP16 PE=1 SV=1	335780	672360	2564700	2544400	0.882982	0.577984	0.730483	0.0276308
_KEES(ph)SNEVVPK_3	Q04636	>sp|Q04636|POB3_YEAST FACT complex subunit POB3 OS=Saccharomyces cerevisiae (strain ATCC 204508 / S288c) GN=POB3 PE=1 SV=1	24355	66694	127230	366550	0.718001	0.740046	0.729024	0.144799
_(ac)S(ph)FHQQFFTLNNGNK_3	Q07551	>sp|Q07551|KAR_YEAST NADPH-dependent alpha-keto amide reductase OS=Saccharomyces cerevisiae (strain ATCC 204508 / S288c) GN=YDL124W PE=1 SV=1	250120	483100	1007900	3441000	0.605269	0.852648	0.728958	0.17017
_SRGES(ph)DDS(ph)LNR_2	Q3E754;P0C0V8	>sp|Q3E754|RS21B_YEAST 40S ribosomal protein S21-B OS=Saccharomyces cerevisiae (strain ATCC 204508 / S288c) GN=RPS21B PE=1 SV=1;>sp|P0C0V8|RS21A_YEAST 40S ribosomal protein S21-A OS=Saccharomyces cerevisiae (strain ATCC 204508 / S288c) GN=RPS21A PE=1 SV=1	942110	5170800	6700600	20819000	0.852012	0.604902	0.728457	0.137759
_HSGISS(ph)TLVSANNDNNSPHTPVTR_4	Q12445	>sp|Q12445|POM34_YEAST Nucleoporin POM34 OS=Saccharomyces cerevisiae (strain ATCC 204508 / S288c) GN=POM34 PE=1 SV=1	26580	91417	164500	422190	0.791611	0.664481	0.728046	0.124254
_RKS(ph)S(ph)S(ph)VTLSPTISHNNNNGK_3	P33749	>sp|P33749|MSN4_YEAST Zinc finger protein MSN4 OS=Saccharomyces cerevisiae (strain ATCC 204508 / S288c) GN=MSN4 PE=1 SV=1	29947	97776	333810	250650	1.04715	0.408835	0.727991	0.101628
_SIS(ph)SLNAGNSSR_2	P38692	>sp|P38692|KIC1_YEAST Serine/threonine-protein kinase KIC1 OS=Saccharomyces cerevisiae (strain ATCC 204508 / S288c) GN=KIC1 PE=1 SV=1	76785	340000	547090	1363200	0.852782	0.603081	0.727932	0.112859
_SRS(ph)S(ph)SIHS(ph)IGSLASNALSR_3	P36148	>sp|P36148|GPT2_YEAST Glycerol-3-phosphate O-acyltransferase 2 OS=Saccharomyces cerevisiae (strain ATCC 204508 / S288c) GN=GPT2 PE=1 SV=1	117850	210100	612340	1152200	0.715663	0.739102	0.727382	0.0961438
_SVHAAVT(ph)PAAGK_3	P32521	>sp|P32521|PAN1_YEAST Actin cytoskeleton-regulatory complex protein PAN1 OS=Saccharomyces cerevisiae (strain ATCC 204508 / S288c) GN=PAN1 PE=1 SV=2	24630	250480	258450	677860	1.02091	0.432367	0.72664	0.0906494
_VTVS(ph)FDELK_2	Q02455	>sp|Q02455|MLP1_YEAST Protein MLP1 OS=Saccharomyces cerevisiae (strain ATCC 204508 / S288c) GN=MLP1 PE=1 SV=2	103830	197020	474140	1223200	0.659584	0.792987	0.726285	0.139763
_FM(ox)S(ph)FSDMVR_2	P34223	>sp|P34223|UBX1_YEAST UBX domain-containing protein 1 OS=Saccharomyces cerevisiae (strain ATCC 204508 / S288c) GN=SHP1 PE=1 SV=1	23997	222680	121550	1245600	0.704598	0.747697	0.726148	0.219735
_ASTS(ph)NNLDELTESK_2	P32873	>sp|P32873|BEM3_YEAST GTPase-activating protein BEM3 OS=Saccharomyces cerevisiae (strain ATCC 204508 / S288c) GN=BEM3 PE=1 SV=3	81223	195300	376650	1192900	0.666259	0.785902	0.72608	0.158356
_S(ph)SANSLHPGSSLR_2	Q12432	>sp|Q12432|EAF3_YEAST Chromatin modification-related protein EAF3 OS=Saccharomyces cerevisiae (strain ATCC 204508 / S288c) GN=EAF3 PE=1 SV=1	10752	177360	60840	884950	0.7527	0.698063	0.725382	0.227505
_MS(ph)S(ph)SSGGDSISR_2	Q9P305	>sp|Q9P305|IGO2_YEAST mRNA stability protein IGO2 OS=Saccharomyces cerevisiae (strain ATCC 204508 / S288c) GN=IGO2 PE=1 SV=3	109170	182340	529720	1060600	0.685943	0.76467	0.725306	0.107849
_DVSQITS(ph)SPKKS(ph)FQDK_2	P38623	>sp|P38623|RCK2_YEAST Serine/threonine-protein kinase RCK2 OS=Saccharomyces cerevisiae (strain ATCC 204508 / S288c) GN=RCK2 PE=1 SV=3	161660	357040	600300	2707300	0.569766	0.87982	0.724793	0.191268
_INS(ph)ASQTEGDELK_2	P17629	>sp|P17629|HPR1_YEAST THO complex subunit HPR1 OS=Saccharomyces cerevisiae (strain ATCC 204508 / S288c) GN=HPR1 PE=1 SV=2	76159	437240	500070	1866900	0.81731	0.630401	0.723855	0.158246
_AIS(ph)DDLEQK_2	Q06208	>sp|Q06208|RIF2_YEAST Protein RIF2 OS=Saccharomyces cerevisiae (strain ATCC 204508 / S288c) GN=RIF2 PE=1 SV=1	27118	86137	367650	177810	1.13218	0.314766	0.723472	0.166294
_NLDVSTDS(ph)NNGSIK_2	Q03525	>sp|Q03525|TMA23_YEAST Protein TMA23 OS=Saccharomyces cerevisiae (strain ATCC 204508 / S288c) GN=TMA23 PE=1 SV=2	34419	105520	168640	601210	0.690162	0.755691	0.722927	0.165828
_KHT(ph)AEDELEDTPS(ph)DGIEEHLSAR_3	Q02554	>sp|Q02554|CUS1_YEAST Cold sensitive U2 snRNA suppressor 1 OS=Saccharomyces cerevisiae (strain ATCC 204508 / S288c) GN=CUS1 PE=1 SV=1	85888	237120	578730	979220	0.828544	0.615912	0.722228	0.0633953
_SGS(ph)VSESITET(ph)DDPKTEEVKK_3	Q07844	>sp|Q07844|RIX7_YEAST Ribosome biogenesis ATPase RIX7 OS=Saccharomyces cerevisiae (strain ATCC 204508 / S288c) GN=RIX7 PE=1 SV=1	51252	84625	883430	136140	1.23646	0.206487	0.721474	0.230321
_S(ph)DSIETTR_2	P40468	>sp|P40468|TAO3_YEAST Cell morphogenesis protein PAG1 OS=Saccharomyces cerevisiae (strain ATCC 204508 / S288c) GN=TAO3 PE=1 SV=1	14969	71847	96126	308770	0.807648	0.633226	0.720437	0.144952
_NNS(ph)TSTITQHSQR_3	Q02100	>sp|Q02100|SKO1_YEAST CRE-binding bZIP protein SKO1 OS=Saccharomyces cerevisiae (strain ATCC 204508 / S288c) GN=SKO1 PE=1 SV=1	120520	547930	798850	2273800	0.821406	0.618027	0.719717	0.130796
_VNSS(ph)STIR_2	P53236	>sp|P53236|RSC1_YEAST Chromatin structure-remodeling complex subunit RSC1 OS=Saccharomyces cerevisiae (strain ATCC 204508 / S288c) GN=RSC1 PE=1 SV=1	62180	391000	2844700	233560	1.66039	-0.223778	0.718304	0.267991
_SVAS(ph)LLSR_2	P27344	>sp|P27344|DPB3_YEAST DNA polymerase epsilon subunit C OS=Saccharomyces cerevisiae (strain ATCC 204508 / S288c) GN=DPB3 PE=1 SV=2	42083	92463	225620	469480	0.729271	0.705649	0.71746	0.105792
_ATLEEAEGES(ph)GVEDDAATGS(ph)SNK_2	P21304	>sp|P21304|PWP1_YEAST Periodic tryptophan protein 1 OS=Saccharomyces cerevisiae (strain ATCC 204508 / S288c) GN=PWP1 PE=1 SV=1	87445	188390	434710	1030800	0.696465	0.738117	0.717291	0.12554
_RVS(ph)ILEDKK_3	P40693	>sp|P40693|RLP7_YEAST Ribosome biogenesis protein RLP7 OS=Saccharomyces cerevisiae (strain ATCC 204508 / S288c) GN=RLP7 PE=1 SV=1	156040	255580	603020	1797100	0.587096	0.847045	0.717071	0.160166
_KRS(ph)SSELEK_3	P38779	>sp|P38779|CIC1_YEAST Proteasome-interacting protein CIC1 OS=Saccharomyces cerevisiae (strain ATCC 204508 / S288c) GN=CIC1 PE=1 SV=1	205410	988930	1456700	3774200	0.850749	0.581659	0.716204	0.115599
_KLS(ph)S(ph)PDTESK_2	P40563	>sp|P40563|AIM21_YEAST Altered inheritance of mitochondria protein 21 OS=Saccharomyces cerevisiae (strain ATCC 204508 / S288c) GN=AIM21 PE=1 SV=1	99275	190330	448320	1140300	0.654748	0.777512	0.71613	0.137918
_S(ph)QGQINAAR_2	O14467	>sp|O14467|MBF1_YEAST Multiprotein-bridging factor 1 OS=Saccharomyces cerevisiae (strain ATCC 204508 / S288c) GN=MBF1 PE=1 SV=2	526900	1439000	2076400	9835700	0.595583	0.834744	0.715164	0.191914
_NEGLSSTS(ph)R_2	P39104	>sp|P39104|PIK1_YEAST Phosphatidylinositol 4-kinase PIK1 OS=Saccharomyces cerevisiae (strain ATCC 204508 / S288c) GN=PIK1 PE=1 SV=1	14356	239960	220710	419170	1.18679	0.242251	0.71452	0.0223723
_GNQDIISNT(ph)S(ph)SLHELK_3	P07866	>sp|P07866|LTE1_YEAST Guanine nucleotide exchange factor LTE1 OS=Saccharomyces cerevisiae (strain ATCC 204508 / S288c) GN=LTE1 PE=1 SV=2	213990	344340	1008400	1958300	0.673239	0.754892	0.714066	0.104406
_VVVPVLADS(ph)FEQEASR_2	P47047	>sp|P47047|MTR4_YEAST ATP-dependent RNA helicase DOB1 OS=Saccharomyces cerevisiae (strain ATCC 204508 / S288c) GN=MTR4 PE=1 SV=1	862040	2381300	4503300	12176000	0.718003	0.708691	0.713347	0.136705
_NKS(ph)FLLHGK_3	P40433	>sp|P40433|6P21_YEAST 6-phosphofructo-2-kinase 1 OS=Saccharomyces cerevisiae (strain ATCC 204508 / S288c) GN=PFK26 PE=1 SV=1	184400	531610	1023200	2555400	0.7442	0.681866	0.713033	0.12493
_NNNNNNSIANDS(ph)NSR_2	P21538	>sp|P21538|REB1_YEAST DNA-binding protein REB1 OS=Saccharomyces cerevisiae (strain ATCC 204508 / S288c) GN=REB1 PE=1 SV=2	22049	52518	99226	311030	0.653237	0.772494	0.712865	0.157652
_IQDPQMT(ph)GY(ph)VSTR_2	P32485	>sp|P32485|HOG1_YEAST Mitogen-activated protein kinase HOG1 OS=Saccharomyces cerevisiae (strain ATCC 204508 / S288c) GN=HOG1 PE=1 SV=2	181200	2048800	2863900	3453300	1.1988	0.226735	0.712767	0.0964786
_AVS(ph)TANDNS(ph)FLQPPHR_2	P32486	>sp|P32486|KRE6_YEAST Beta-glucan synthesis-associated protein KRE6 OS=Saccharomyces cerevisiae (strain ATCC 204508 / S288c) GN=KRE6 PE=1 SV=2	22241	133810	179220	441820	0.906232	0.518757	0.712494	0.0999671
_TYSLRNSRAPT(ph)AS(ph)QLQNPPPPPSTTK_4	P53252	>sp|P53252|PIL1_YEAST Sphingolipid long chain base-responsive protein PIL1 OS=Saccharomyces cerevisiae (strain ATCC 204508 / S288c) GN=PIL1 PE=1 SV=1	207010	90181	656900	754700	0.501508	0.922659	0.712084	0.0605632
_TLYGVES(ph)FINDK_2	P53277	>sp|P53277|SYF2_YEAST Pre-mRNA-splicing factor SYF2 OS=Saccharomyces cerevisiae (strain ATCC 204508 / S288c) GN=SYF2 PE=1 SV=1	43608	171950	316260	626950	0.860478	0.561831	0.711154	0.0781582
_ARPFYLTHLITQS(ph)VS(ph)PK_3	Q12163	>sp|Q12163|NBP2_YEAST NAP1-binding protein 2 OS=Saccharomyces cerevisiae (strain ATCC 204508 / S288c) GN=NBP2 PE=1 SV=1	57868	77835	189940	626470	0.516178	0.905725	0.710952	0.174805
_(ac)SLVVQEQGS(ph)FQHILR_2	P0CX55;P0CX56	>sp|P0CX55|RS18A_YEAST 40S ribosomal protein S18-A OS=Saccharomyces cerevisiae (strain ATCC 204508 / S288c) GN=RPS18A PE=1 SV=1;>sp|P0CX56|RS18B_YEAST 40S ribosomal protein S18-B OS=Saccharomyces cerevisiae (strain ATCC 204508 / S288c) GN=RPS18B PE=1 SV=1	123850	219040	745600	950460	0.77961	0.63741	0.70851	0.0257417
_PQFDHGDHGTNSSST(ph)FISSAK_3	P38996	>sp|P38996|NAB3_YEAST Nuclear polyadenylated RNA-binding protein 3 OS=Saccharomyces cerevisiae (strain ATCC 204508 / S288c) GN=NAB3 PE=1 SV=1	39413	448340	320360	1434300	0.909999	0.505033	0.707516	0.16164
_EAETT(ph)STGEITTNNHTK_2	Q03631	>sp|Q03631|WAR1_YEAST Weak acid resistance protein 1 OS=Saccharomyces cerevisiae (strain ATCC 204508 / S288c) GN=WAR1 PE=1 SV=1	8844	16343	31847	117820	0.55642	0.857887	0.707154	0.179044
_TNNS(ph)SNRHS(ph)FRR_3	P39935	>sp|P39935|IF4F1_YEAST Eukaryotic initiation factor 4F subunit p150 OS=Saccharomyces cerevisiae (strain ATCC 204508 / S288c) GN=TIF4631 PE=1 SV=2	842760	8477500	9798700	18723000	1.06546	0.344108	0.704786	0.0213455
_NS(ph)VGSVSEVGPDSTQEETPR_2	Q05027	>sp|Q05027|TAF9_YEAST Transcription initiation factor TFIID subunit 9 OS=Saccharomyces cerevisiae (strain ATCC 204508 / S288c) GN=TAF9 PE=1 SV=1	69392	54828	333330	292550	0.681565	0.727198	0.704381	0.0166193
_S(ph)HGSSNIDLPASLR_3	P43565	>sp|P43565|RIM15_YEAST Serine/threonine-protein kinase RIM15 OS=Saccharomyces cerevisiae (strain ATCC 204508 / S288c) GN=RIM15 PE=1 SV=1	177260	71429	382380	847650	0.333884	1.07434	0.704113	0.167765
_LAAAQQQAQAS(ph)GIMPSNEDVATK_3	P38879	>sp|P38879|NACA_YEAST Nascent polypeptide-associated complex subunit alpha OS=Saccharomyces cerevisiae (strain ATCC 204508 / S288c) GN=EGD2 PE=1 SV=3	195360	515640	1148100	2226500	0.769144	0.635276	0.70221	0.0882641
_SVHAAVT(ph)PAAGK_2	P32521	>sp|P32521|PAN1_YEAST Actin cytoskeleton-regulatory complex protein PAN1 OS=Saccharomyces cerevisiae (strain ATCC 204508 / S288c) GN=PAN1 PE=1 SV=2	34235	208970	194250	930800	0.753891	0.648772	0.701332	0.18056
_VS(ph)GSTAGDSSIASSSSNLR_2	P38426	>sp|P38426|TPS3_YEAST Trehalose synthase complex regulatory subunit TPS3 OS=Saccharomyces cerevisiae (strain ATCC 204508 / S288c) GN=TPS3 PE=1 SV=3	70878	93670	133070	1259800	0.273569	1.1287	0.701135	0.23304
_VISVS(ph)S(ph)NSNSR_2	P53890	>sp|P53890|BNI5_YEAST Bud neck protein 5 OS=Saccharomyces cerevisiae (strain ATCC 204508 / S288c) GN=BNI5 PE=1 SV=1	38564	2218800	667140	3238000	1.23803	0.164159	0.701097	0.0740913
_DAM(ox)MS(ph)APGS(ph)R_2	P06634	>sp|P06634|DED1_YEAST ATP-dependent RNA helicase DED1 OS=Saccharomyces cerevisiae (strain ATCC 204508 / S288c) GN=DED1 PE=1 SV=2	110100	1462600	569680	7085800	0.713844	0.685263	0.699553	0.224042
_SES(ph)VLKDPSQK_2	Q02555	>sp|Q02555|RNT1_YEAST Ribonuclease 3 OS=Saccharomyces cerevisiae (strain ATCC 204508 / S288c) GN=RNT1 PE=1 SV=1	215090	613330	1050900	3143900	0.688941	0.709775	0.699358	0.148458
_(ac)S(ph)EVIEGNVK_2	P20081	>sp|P20081|FKBP_YEAST FK506-binding protein 1 OS=Saccharomyces cerevisiae (strain ATCC 204508 / S288c) GN=FPR1 PE=1 SV=2	74846	92472	246390	703010	0.517454	0.880951	0.699203	0.162812
_GDLSS(ph)SVEIEVEK_2	Q03661	>sp|Q03661|ESC1_YEAST Silent chromatin protein ESC1 OS=Saccharomyces cerevisiae (strain ATCC 204508 / S288c) GN=ESC1 PE=1 SV=1	24888	54046	117980	285130	0.675818	0.722279	0.699049	0.1281
_TAGGSSPATPATPAT(ph)PAT(ph)PTPSSGPK_3	P38249	>sp|P38249|EIF3A_YEAST Eukaryotic translation initiation factor 3 subunit A OS=Saccharomyces cerevisiae (strain ATCC 204508 / S288c) GN=RPG1 PE=1 SV=1	115620	184900	336830	1586800	0.464378	0.933585	0.698982	0.200184
_S(ph)SETSPDSTPAPSAPASTNAPTNNK_3	P53235	>sp|P53235|EIF2A_YEAST Eukaryotic translation initiation factor 2A OS=Saccharomyces cerevisiae (strain ATCC 204508 / S288c) GN=YGR054W PE=1 SV=1	175160	457280	3513500	569060	1.30231	0.0949759	0.69864	0.239346
_KS(ph)DSGTVLGAIPLNSR_3	Q08422	>sp|Q08422|YO052_YEAST AN1-type zinc finger protein YOR052C OS=Saccharomyces cerevisiae (strain ATCC 204508 / S288c) GN=YOR052C PE=1 SV=1	110470	610070	902200	1854500	0.912058	0.482847	0.697453	0.0696373
_DAM(ox)M(ox)S(ph)APGS(ph)RSNS(ph)R_3	P06634	>sp|P06634|DED1_YEAST ATP-dependent RNA helicase DED1 OS=Saccharomyces cerevisiae (strain ATCC 204508 / S288c) GN=DED1 PE=1 SV=2	30249	93392	122280	573120	0.606644	0.787936	0.69729	0.189668
_ESLNS(ph)PLLTK_2	P38345	>sp|P38345|FMP21_YEAST Protein FMP21, mitochondrial OS=Saccharomyces cerevisiae (strain ATCC 204508 / S288c) GN=FMP21 PE=1 SV=2	660460	1955700	2769500	11564000	0.622555	0.771806	0.69718	0.181221
_DAFLEATS(ph)EDEIIS(ph)R_2	P16861	>sp|P16861|PFKA1_YEAST ATP-dependent 6-phosphofructokinase subunit alpha OS=Saccharomyces cerevisiae (strain ATCC 204508 / S288c) GN=PFK1 PE=1 SV=1	262390	412130	1226000	2176900	0.669543	0.722804	0.696174	0.0909129
_QNS(ph)TPVLPTLPQNVPIR_2	Q04195	>sp|Q04195|SIZ1_YEAST E3 SUMO-protein ligase SIZ1 OS=Saccharomyces cerevisiae (strain ATCC 204508 / S288c) GN=SIZ1 PE=1 SV=1	56421	133100	269120	688540	0.678505	0.713751	0.696128	0.13359
_LAPTNSGGS(ph)GGKLDDPSGASSY(ph)YASHR_3	P43603	>sp|P43603|LSB3_YEAST LAS seventeen-binding protein 3 OS=Saccharomyces cerevisiae (strain ATCC 204508 / S288c) GN=LSB3 PE=1 SV=3	98722	102310	309550	804420	0.496317	0.895565	0.695941	0.157145
_NTAS(ph)FAGSKK_2	P27476	>sp|P27476|NSR1_YEAST Nuclear localization sequence-binding protein OS=Saccharomyces cerevisiae (strain ATCC 204508 / S288c) GN=NSR1 PE=1 SV=1	398750	95662	521480	1802700	0.116537	1.27518	0.69586	0.227154
_IRS(ph)SS(ph)SLELDSEKNEK_3	Q06704	>sp|Q06704|IMH1_YEAST Golgin IMH1 OS=Saccharomyces cerevisiae (strain ATCC 204508 / S288c) GN=IMH1 PE=1 SV=1	372340	3537200	2830600	11454000	0.880939	0.510298	0.695618	0.154166
_LVKT(ph)HS(ph)GHLEQK_3	P38809	>sp|P38809|YHP7_YEAST Uncharacterized protein YHR097C OS=Saccharomyces cerevisiae (strain ATCC 204508 / S288c) GN=YHR097C PE=1 SV=1	1613700	4445800	8193800	21548000	0.705663	0.685457	0.69556	0.133087
_S(ph)RLDPALGGGSSDR_3	P34167	>sp|P34167|IF4B_YEAST Eukaryotic translation initiation factor 4B OS=Saccharomyces cerevisiae (strain ATCC 204508 / S288c) GN=TIF3 PE=1 SV=1	17865	66224	96316	302220	0.731695	0.659308	0.695502	0.147844
_VTS(ph)GDNFK_2	Q04177	>sp|Q04177|UTP5_YEAST U3 small nucleolar RNA-associated protein 5 OS=Saccharomyces cerevisiae (strain ATCC 204508 / S288c) GN=UTP5 PE=1 SV=1	111560	261700	426710	1679900	0.582624	0.80748	0.695052	0.180397
_AGS(ph)FLSSS(ph)FR_2	P38165	>sp|P38165|RTG3_YEAST Retrograde regulation protein 3 OS=Saccharomyces cerevisiae (strain ATCC 204508 / S288c) GN=RTG3 PE=1 SV=2	81769	124700	367230	680510	0.652349	0.736968	0.694659	0.0989734
_RS(ph)SFTTANEVDSEILLLHGSSESSPIFK_4	Q07807	>sp|Q07807|PUF3_YEAST mRNA-binding protein PUF3 OS=Saccharomyces cerevisiae (strain ATCC 204508 / S288c) GN=PUF3 PE=1 SV=1	34673	756720	600920	1068200	1.23883	0.149717	0.694271	0.089921
_VSSTATS(ph)S(ph)IYQK_2	P25623	>sp|P25623|SYP1_YEAST Suppressor of yeast profilin deletion OS=Saccharomyces cerevisiae (strain ATCC 204508 / S288c) GN=SYP1 PE=1 SV=3	108730	143950	350460	1080700	0.508289	0.875493	0.691891	0.169613
_NDS(ph)DISIAGK_2	Q06337	>sp|Q06337|EAF1_YEAST Chromatin modification-related protein EAF1 OS=Saccharomyces cerevisiae (strain ATCC 204508 / S288c) GN=EAF1 PE=1 SV=2	40887	131690	183800	708050	0.65276	0.730511	0.691636	0.172633
_ERS(ph)SSFISILDDETR_3	P27515	>sp|P27515|URK1_YEAST Uridine kinase OS=Saccharomyces cerevisiae (strain ATCC 204508 / S288c) GN=URK1 PE=1 SV=1	34550	103980	184640	469950	0.727878	0.655102	0.69149	0.126115
_QYSS(ph)FEDQYGR_2	P39940	>sp|P39940|RSP5_YEAST E3 ubiquitin-protein ligase RSP5 OS=Saccharomyces cerevisiae (strain ATCC 204508 / S288c) GN=RSP5 PE=1 SV=1	105030	186990	406290	1165200	0.587523	0.794582	0.691052	0.154904
_LLT(ph)PQTS(ph)SNHALSK_2	Q06146	>sp|Q06146|YL257_YEAST Uncharacterized protein YLR257W OS=Saccharomyces cerevisiae (strain ATCC 204508 / S288c) GN=YLR257W PE=1 SV=1	143050	469170	764860	2111300	0.728094	0.65322	0.690657	0.134779
_EAS(ph)GVFDDLVR_2	P31373	>sp|P31373|CYS3_YEAST Cystathionine gamma-lyase OS=Saccharomyces cerevisiae (strain ATCC 204508 / S288c) GN=CYS3 PE=1 SV=2	49050	104870	249380	494870	0.706223	0.67384	0.690031	0.0989553
_IEESSS(ph)TNSVIEESSEPK_2	Q03323	>sp|Q03323|SDC1_YEAST COMPASS component SDC1 OS=Saccharomyces cerevisiae (strain ATCC 204508 / S288c) GN=SDC1 PE=1 SV=1	18888	61193	94830	291510	0.70076	0.677952	0.689356	0.148618
_IDVS(ph)SDLLK_2	P40161	>sp|P40161|RT106_YEAST Histone chaperone RTT106 OS=Saccharomyces cerevisiae (strain ATCC 204508 / S288c) GN=RTT106 PE=1 SV=1	29244	55885	104570	371560	0.55337	0.822734	0.688052	0.17544
_HS(ph)GISSTLVSANNDNNSPHTPVTR_3	Q12445	>sp|Q12445|POM34_YEAST Nucleoporin POM34 OS=Saccharomyces cerevisiae (strain ATCC 204508 / S288c) GN=POM34 PE=1 SV=1	71692	229660	367900	1060000	0.710259	0.664221	0.68724	0.140928
_S(ph)FSHSITTNTPNVK_2	P34219	>sp|P34219|TOD6_YEAST Transcriptional regulatory protein TOD6 OS=Saccharomyces cerevisiae (strain ATCC 204508 / S288c) GN=TOD6 PE=1 SV=1	78575	420930	480210	1629700	0.786147	0.587898	0.687022	0.147889
_QS(ph)PTASSNPEAEQITFVTAK_3	P06778	>sp|P06778|RAD52_YEAST DNA repair and recombination protein RAD52 OS=Saccharomyces cerevisiae (strain ATCC 204508 / S288c) GN=RAD52 PE=1 SV=2	68585	1815200	1174700	2506000	1.2337	0.140057	0.686877	0.0723003
_LNALS(ph)SLQMMTPIASSAPR_3	P27705	>sp|P27705|MIG1_YEAST Regulatory protein MIG1 OS=Saccharomyces cerevisiae (strain ATCC 204508 / S288c) GN=MIG1 PE=1 SV=1	20406	43910	164510	128600	0.906434	0.466678	0.686556	0.0808735
_KIPDTYTANTS(ph)AQSIASAK_3	P39705	>sp|P39705|NUP60_YEAST Nucleoporin NUP60 OS=Saccharomyces cerevisiae (strain ATCC 204508 / S288c) GN=NUP60 PE=1 SV=1	83837	112390	303530	732460	0.558766	0.814056	0.686411	0.141614
_SVVSGGNMMDHQDHS(ph)EMDTLAK_3	Q00816	>sp|Q00816|REG1_YEAST Resistance to glucose repression protein 1 OS=Saccharomyces cerevisiae (strain ATCC 204508 / S288c) GN=REG1 PE=1 SV=1	48717	65287	344570	217370	0.849597	0.522373	0.685985	0.0988589
_PQINT(ph)SPK_3	P46674	>sp|P46674|SAC3_YEAST Nuclear mRNA export protein SAC3 OS=Saccharomyces cerevisiae (strain ATCC 204508 / S288c) GN=SAC3 PE=1 SV=2	2606700	4471500	8556800	32027000	0.51622	0.855063	0.685642	0.182306
_NDAS(ph)FKNPSGIGNDNSK_3	P18961	>sp|P18961|YPK2_YEAST Serine/threonine-protein kinase YPK2/YKR2 OS=Saccharomyces cerevisiae (strain ATCC 204508 / S288c) GN=YPK2 PE=1 SV=1	57210	221310	294640	1010200	0.71182	0.659406	0.685613	0.156944
_EAETTS(ph)TGEITTNNHTK_3	Q03631	>sp|Q03631|WAR1_YEAST Weak acid resistance protein 1 OS=Saccharomyces cerevisiae (strain ATCC 204508 / S288c) GN=WAR1 PE=1 SV=1	58511	112760	216400	716110	0.56802	0.802825	0.685422	0.168529
_EPEEKIS(ph)IGNK_3	Q05050	>sp|Q05050|EIS1_YEAST Eisosome protein 1 OS=Saccharomyces cerevisiae (strain ATCC 204508 / S288c) GN=EIS1 PE=1 SV=1	512950	20874	314340	798460	-0.212675	1.58265	0.684986	0.3296
_VS(ph)SSEIESVEPLKPESDR_3	Q03661	>sp|Q03661|ESC1_YEAST Silent chromatin protein ESC1 OS=Saccharomyces cerevisiae (strain ATCC 204508 / S288c) GN=ESC1 PE=1 SV=1	189350	353300	788610	1986900	0.619597	0.750032	0.684815	0.138085
_HRS(ph)SNSVLSGGSSR_3	Q00416	>sp|Q00416|SEN1_YEAST Helicase SEN1 OS=Saccharomyces cerevisiae (strain ATCC 204508 / S288c) GN=SEN1 PE=1 SV=2	47385	254280	396050	711920	0.922109	0.447119	0.684614	0.0427616
_T(ph)VSSESYQSEQESSTPLLK_2	Q07532	>sp|Q07532|IWR1_YEAST RNA polymerase II nuclear localization protein IWR1 OS=Saccharomyces cerevisiae (strain ATCC 204508 / S288c) GN=IWR1 PE=1 SV=2	75401	115890	154870	1316100	0.31259	1.05524	0.683917	0.228955
_SLASTSKLS(ph)HFS(ph)NLEDASFK_3	Q02725	>sp|Q02725|VTC3_YEAST Vacuolar transporter chaperone 3 OS=Saccharomyces cerevisiae (strain ATCC 204508 / S288c) GN=VTC3 PE=1 SV=1	73350	1110000	906990	2093000	1.0922	0.275446	0.683824	0.026112
_LSDVDGGVGS(ph)R_2	P38915	>sp|P38915|SPT8_YEAST Transcription factor SPT8 OS=Saccharomyces cerevisiae (strain ATCC 204508 / S288c) GN=SPT8 PE=1 SV=1	129970	120980	307660	1191000	0.374228	0.993198	0.683713	0.197619
_ADS(ph)GDTSS(ph)IHS(ph)SANNTK_2	Q06385	>sp|Q06385|VPS74_YEAST Vacuolar protein sorting-associated protein 74 OS=Saccharomyces cerevisiae (strain ATCC 204508 / S288c) GN=VPS74 PE=1 SV=1	118890	2713900	1911400	3933500	1.20621	0.161185	0.683696	0.0598286
_(ac)SLVVQEQGS(ph)FQHILR_3	P0CX55;P0CX56	>sp|P0CX55|RS18A_YEAST 40S ribosomal protein S18-A OS=Saccharomyces cerevisiae (strain ATCC 204508 / S288c) GN=RPS18A PE=1 SV=1;>sp|P0CX56|RS18B_YEAST 40S ribosomal protein S18-B OS=Saccharomyces cerevisiae (strain ATCC 204508 / S288c) GN=RPS18B PE=1 SV=1	28357	63468	152990	273320	0.732003	0.634117	0.68306	0.0794086
_DNS(ph)ILEK_2	P34078	>sp|P34078|LTV1_YEAST Protein LTV1 OS=Saccharomyces cerevisiae (strain ATCC 204508 / S288c) GN=LTV1 PE=1 SV=2	209380	943500	1098600	4172000	0.719904	0.645602	0.682753	0.16445
_ATLEEAEGES(ph)GVEDDAATGS(ph)SNK_3	P21304	>sp|P21304|PWP1_YEAST Periodic tryptophan protein 1 OS=Saccharomyces cerevisiae (strain ATCC 204508 / S288c) GN=PWP1 PE=1 SV=1	170790	343190	553600	2442600	0.510734	0.852318	0.681526	0.19259
_YHFPSSS(ph)HSHSNSQNELLTTPSSSSTK_4	P26570	>sp|P26570|PPZ1_YEAST Serine/threonine-protein phosphatase PP-Z1 OS=Saccharomyces cerevisiae (strain ATCC 204508 / S288c) GN=PPZ1 PE=1 SV=5	136440	261740	643260	1277500	0.673445	0.688491	0.680968	0.102682
_EIVNRLS(ph)TTTQDINETIEGVK_3	Q03290	>sp|Q03290|TFB3_YEAST RNA polymerase II transcription factor B subunit 3 OS=Saccharomyces cerevisiae (strain ATCC 204508 / S288c) GN=TFB3 PE=1 SV=1	58638	122100	321460	510220	0.738948	0.621042	0.679995	0.0605302
_LVNEPT(ph)NSDIVELD_2	P52488	>sp|P52488|UBA2_YEAST Ubiquitin-activating enzyme E1-like OS=Saccharomyces cerevisiae (strain ATCC 204508 / S288c) GN=UBA2 PE=1 SV=1	166290	275410	625530	1676200	0.575382	0.784346	0.679864	0.149159
_SQENNNEES(ph)FKENNK_3	Q12297	>sp|Q12297|TAF3_YEAST Transcription initiation factor TFIID subunit 3 OS=Saccharomyces cerevisiae (strain ATCC 204508 / S288c) GN=TAF3 PE=1 SV=1	145940	202930	652950	1035500	0.650706	0.707804	0.679255	0.075888
_VVVPVLADS(ph)FEQEASR_3	P47047	>sp|P47047|MTR4_YEAST ATP-dependent RNA helicase DOB1 OS=Saccharomyces cerevisiae (strain ATCC 204508 / S288c) GN=MTR4 PE=1 SV=1	559240	1080000	2280600	6045300	0.610451	0.747994	0.679222	0.143776
_NNNALSFHNPS(ph)PARR_3	P40340	>sp|P40340|TBP7_YEAST Tat-binding homolog 7 OS=Saccharomyces cerevisiae (strain ATCC 204508 / S288c) GN=YTA7 PE=1 SV=2	52452	63053	160980	468720	0.48701	0.871208	0.679109	0.166791
_(ac)MLVFGPNS(ph)SFVR_2	P33749	>sp|P33749|MSN4_YEAST Zinc finger protein MSN4 OS=Saccharomyces cerevisiae (strain ATCC 204508 / S288c) GN=MSN4 PE=1 SV=1	26429	66922	219350	183100	0.919057	0.437119	0.678088	0.0774635
_IDS(ph)FNVVR_2	P13382	>sp|P13382|DPOA_YEAST DNA polymerase alpha catalytic subunit A OS=Saccharomyces cerevisiae (strain ATCC 204508 / S288c) GN=POL1 PE=1 SV=2	66933	159020	338690	712400	0.704162	0.651272	0.677717	0.104694
_TSS(ph)QTSLSSK_2	Q03790	>sp|Q03790|NUP53_YEAST Nucleoporin NUP53 OS=Saccharomyces cerevisiae (strain ATCC 204508 / S288c) GN=NUP53 PE=1 SV=1	542980	51549	777290	814890	0.155799	1.19888	0.677339	0.1552
_RNS(ph)TQEVGEPIPR_2	Q12192	>sp|Q12192|RFM1_YEAST Repression factor of MSEs protein 1 OS=Saccharomyces cerevisiae (strain ATCC 204508 / S288c) GN=RFM1 PE=1 SV=1	29039	55458	103880	349890	0.55355	0.799967	0.676759	0.170768
_LNS(ph)KEVIDDLTK_2	Q05942	>sp|Q05942|RSA3_YEAST Ribosome assembly protein 3 OS=Saccharomyces cerevisiae (strain ATCC 204508 / S288c) GN=RSA3 PE=1 SV=1	118510	183690	392300	1251700	0.519863	0.833415	0.676639	0.17012
_S(ph)DSADVPAFSNSNGFNNVTFGSK_3	Q03790	>sp|Q03790|NUP53_YEAST Nucleoporin NUP53 OS=Saccharomyces cerevisiae (strain ATCC 204508 / S288c) GN=NUP53 PE=1 SV=1	33672	91703	1168200	59519	1.54025	-0.187728	0.67626	0.259027
_ISS(ph)GIDAGK_2	P47035	>sp|P47035|NET1_YEAST Nucleolar protein NET1 OS=Saccharomyces cerevisiae (strain ATCC 204508 / S288c) GN=NET1 PE=1 SV=1	79308	425090	497630	1523300	0.79759	0.554305	0.675947	0.134153
_TAT(ph)QEGVISFWR_2	P18239	>sp|P18239|ADT2_YEAST ADP,ATP carrier protein 2 OS=Saccharomyces cerevisiae (strain ATCC 204508 / S288c) GN=PET9 PE=1 SV=2	57181	123710	574400	276810	1.00196	0.349777	0.67587	0.158394
_LVKT(ph)HS(ph)GHLEQK_4	P38809	>sp|P38809|YHP7_YEAST Uncharacterized protein YHR097C OS=Saccharomyces cerevisiae (strain ATCC 204508 / S288c) GN=YHR097C PE=1 SV=1	125040	266600	623360	1201700	0.69769	0.653936	0.675813	0.0941478
_FCNGVPDIYIS(ph)QK_2	P27692	>sp|P27692|SPT5_YEAST Transcription elongation factor SPT5 OS=Saccharomyces cerevisiae (strain ATCC 204508 / S288c) GN=SPT5 PE=1 SV=1	41660	107340	240460	417420	0.761324	0.589812	0.675568	0.0685281
_RVGDEGNAAES(ph)ES(ph)DNVAASR_3	P23615	>sp|P23615|SPT6_YEAST Transcription elongation factor SPT6 OS=Saccharomyces cerevisiae (strain ATCC 204508 / S288c) GN=SPT6 PE=1 SV=1	536110	18293	300730	731260	-0.251077	1.60179	0.675355	0.351501
_TVS(ph)SESYQSEQESSTPLLK_3	Q07532	>sp|Q07532|IWR1_YEAST RNA polymerase II nuclear localization protein IWR1 OS=Saccharomyces cerevisiae (strain ATCC 204508 / S288c) GN=IWR1 PE=1 SV=2	87672	230960	454880	994860	0.715036	0.634225	0.674631	0.107368
_DSYSTS(ph)QYNR_2	Q12443	>sp|Q12443|RTN2_YEAST Reticulon-like protein 2 OS=Saccharomyces cerevisiae (strain ATCC 204508 / S288c) GN=RTN2 PE=1 SV=1	48879	104180	189530	598550	0.588556	0.759316	0.673936	0.16177
_(ac)S(ph)EENLRPAYDDQVNEDVYK_2	Q12211	>sp|Q12211|PUS1_YEAST tRNA pseudouridine synthase 1 OS=Saccharomyces cerevisiae (strain ATCC 204508 / S288c) GN=PUS1 PE=1 SV=1	266410	562220	1018300	3276600	0.582325	0.765517	0.673921	0.163984
_GSTDNNLVTTTST(ph)SS(ph)IFHDEDLTFFDR_3	P07269	>sp|P07269|PHO2_YEAST Regulatory protein PHO2 OS=Saccharomyces cerevisiae (strain ATCC 204508 / S288c) GN=PHO2 PE=1 SV=1	143150	350190	767660	1451900	0.729378	0.617633	0.673505	0.0858502
_KS(ph)DSGTVLGAIPLNS(ph)R_2	Q08422	>sp|Q08422|YO052_YEAST AN1-type zinc finger protein YOR052C OS=Saccharomyces cerevisiae (strain ATCC 204508 / S288c) GN=YOR052C PE=1 SV=1	46170	62689	173200	370720	0.574188	0.771855	0.673021	0.125495
_IS(ph)SDFNLLVPNLSPR_3	P32618	>sp|P32618|YEF3_YEAST Uncharacterized protein YEL043W OS=Saccharomyces cerevisiae (strain ATCC 204508 / S288c) GN=YEL043W PE=1 SV=1	9570.9	47765	58466	172720	0.785951	0.558233	0.672092	0.131275
_LNDAVEYVS(ph)GR_2	P22943	>sp|P22943|HSP12_YEAST 12 kDa heat shock protein OS=Saccharomyces cerevisiae (strain ATCC 204508 / S288c) GN=HSP12 PE=1 SV=1	1100600	2189600	3567100	14895000	0.510686	0.832676	0.671681	0.188966
_TTSS(ph)S(ph)FESEIK_2	P11433	>sp|P11433|CDC24_YEAST Cell division control protein 24 OS=Saccharomyces cerevisiae (strain ATCC 204508 / S288c) GN=CDC24 PE=1 SV=2	28360	241190	205350	734340	0.859788	0.483538	0.671663	0.140317
_SLDSSNAS(ph)FNNQGK_2	Q12321	>sp|Q12321|MED1_YEAST Mediator of RNA polymerase II transcription subunit 1 OS=Saccharomyces cerevisiae (strain ATCC 204508 / S288c) GN=MED1 PE=1 SV=1	184790	544200	1000000	2206500	0.733322	0.607945	0.670633	0.104868
_LSS(ph)ESVIEQIVK_2	P05756	>sp|P05756|RS13_YEAST 40S ribosomal protein S13 OS=Saccharomyces cerevisiae (strain ATCC 204508 / S288c) GN=RPS13 PE=1 SV=3	191380	332030	1961100	710830	1.0106	0.330588	0.670596	0.18288
_TQS(ph)S(ph)GSLLSR_2	Q99247	>sp|Q99247|YO087_YEAST Uncharacterized WD repeat-containing protein YOL087C OS=Saccharomyces cerevisiae (strain ATCC 204508 / S288c) GN=YOL087C PE=1 SV=1	399560	87752	500390	1535500	0.0977266	1.24299	0.67036	0.227867
_QLLM(ox)AS(ph)GVNK_3	P15179	>sp|P15179|SYDM_YEAST Aspartate--tRNA ligase, mitochondrial OS=Saccharomyces cerevisiae (strain ATCC 204508 / S288c) GN=MSD1 PE=1 SV=1	85102	1311600	399040	6113600	0.671077	0.668496	0.669786	0.22922
_AS(ph)FTDEEDEFILDVVR_2	P11938	>sp|P11938|RAP1_YEAST DNA-binding protein RAP1 OS=Saccharomyces cerevisiae (strain ATCC 204508 / S288c) GN=RAP1 PE=1 SV=2	143460	215380	443200	1522800	0.489869	0.849437	0.669653	0.178264
_(ac)MAT(ph)M(ox)ETTTQK_2	Q12163	>sp|Q12163|NBP2_YEAST NAP1-binding protein 2 OS=Saccharomyces cerevisiae (strain ATCC 204508 / S288c) GN=NBP2 PE=1 SV=1	29723	76688	111310	445490	0.573442	0.764111	0.668776	0.180699
_SSATS(ph)ITS(ph)LGVK_2	P36107	>sp|P36107|AUR1_YEAST Inositol phosphorylceramide synthase catalytic subunit AUR1 OS=Saccharomyces cerevisiae (strain ATCC 204508 / S288c) GN=AUR1 PE=1 SV=1	191650	26216	223400	488720	0.0665743	1.27049	0.668534	0.228183
_QNS(ph)STVSSNVHGNTIVR_3	P38781	>sp|P38781|RSC30_YEAST Chromatin structure-remodeling complex protein RSC30 OS=Saccharomyces cerevisiae (strain ATCC 204508 / S288c) GN=RSC30 PE=1 SV=2	304830	486430	1048700	3069500	0.536594	0.800047	0.66832	0.160748
_FVDDS(ph)DTS(ph)YEEKEK_3	Q08951	>sp|Q08951|AP3D_YEAST AP-3 complex subunit delta OS=Saccharomyces cerevisiae (strain ATCC 204508 / S288c) GN=APL5 PE=1 SV=1	623990	78861	593180	1797800	-0.0219911	1.35788	0.667944	0.255705
_YSELADISSSETSSQHNES(ph)DPDDLTTAPDEEY(ph)VSDLEMDDAK_4	P38427	>sp|P38427|TSL1_YEAST Trehalose synthase complex regulatory subunit TSL1 OS=Saccharomyces cerevisiae (strain ATCC 204508 / S288c) GN=TSL1 PE=1 SV=1	70310	114990	118070	1480300	0.225122	1.10969	0.667406	0.23887
_ATSS(ph)AGAVFK_2	P20676	>sp|P20676|NUP1_YEAST Nucleoporin NUP1 OS=Saccharomyces cerevisiae (strain ATCC 204508 / S288c) GN=NUP1 PE=1 SV=1	52891	75835	168140	514040	0.502289	0.831127	0.666708	0.168138
_AS(ph)SLVSLSSSSATPSTSR_3	P21538	>sp|P21538|REB1_YEAST DNA-binding protein REB1 OS=Saccharomyces cerevisiae (strain ATCC 204508 / S288c) GN=REB1 PE=1 SV=2	51404	131970	223540	653630	0.638358	0.694857	0.666608	0.148546
_CLS(ph)INGTK_2	P53866	>sp|P53866|SQS1_YEAST Protein SQS1 OS=Saccharomyces cerevisiae (strain ATCC 204508 / S288c) GN=SQS1 PE=1 SV=1	37746	54654	155390	284870	0.614552	0.717025	0.665788	0.0996236
_DANIKPVVNAAVNDNQS(ph)KVS(ph)VATEQTK_4	P38250	>sp|P38250|IST2_YEAST Increased sodium tolerance protein 2 OS=Saccharomyces cerevisiae (strain ATCC 204508 / S288c) GN=IST2 PE=1 SV=2	238080	924130	1344500	3509800	0.751838	0.579549	0.665694	0.121298
_ASIASS(ph)FR_2	Q12230	>sp|Q12230|LSP1_YEAST Sphingolipid long chain base-responsive protein LSP1 OS=Saccharomyces cerevisiae (strain ATCC 204508 / S288c) GN=LSP1 PE=1 SV=1	23120	119080	801620	73576	1.53998	-0.209103	0.665439	0.268584
_S(ph)SSSANGTVQEDTSSK_2	Q03656	>sp|Q03656|SKY1_YEAST Serine/threonine-protein kinase SKY1 OS=Saccharomyces cerevisiae (strain ATCC 204508 / S288c) GN=SKY1 PE=1 SV=1	64334	170560	236230	994290	0.564894	0.765636	0.665265	0.184515
_YAINDNSEEWAES(ph)QKSLEIAAK_3	P53914	>sp|P53914|KRE33_YEAST UPF0202 protein KRE33 OS=Saccharomyces cerevisiae (strain ATCC 204508 / S288c) GN=KRE33 PE=1 SV=1	143080	172300	845940	619560	0.771761	0.555798	0.663779	0.0696092
_(ac)S(ph)FHQQFFTLNNGNK_2	Q07551	>sp|Q07551|KAR_YEAST NADPH-dependent alpha-keto amide reductase OS=Saccharomyces cerevisiae (strain ATCC 204508 / S288c) GN=YDL124W PE=1 SV=1	933360	1841000	3491500	10442000	0.572963	0.75373	0.663346	0.157979
_KLS(ph)DLSK_2	Q07653	>sp|Q07653|HBT1_YEAST Protein HBT1 OS=Saccharomyces cerevisiae (strain ATCC 204508 / S288c) GN=HBT1 PE=1 SV=1	128430	297100	397480	2036200	0.490649	0.835918	0.663283	0.201143
_ADS(ph)PMQSVK_2	P43579	>sp|P43579|IES1_YEAST Ino eighty subunit 1 OS=Saccharomyces cerevisiae (strain ATCC 204508 / S288c) GN=IES1 PE=1 SV=1	143310	739200	596340	3766400	0.619217	0.707164	0.663191	0.202715
_NNDIES(ph)SS(ph)PSQLQHEA_2	P25297	>sp|P25297|PHO84_YEAST Inorganic phosphate transporter PHO84 OS=Saccharomyces cerevisiae (strain ATCC 204508 / S288c) GN=PHO84 PE=1 SV=2	123180	563610	664420	2214100	0.731902	0.594219	0.663061	0.149135
_SDSGT(ph)VLGAIPLNS(ph)R_2	Q08422	>sp|Q08422|YO052_YEAST AN1-type zinc finger protein YOR052C OS=Saccharomyces cerevisiae (strain ATCC 204508 / S288c) GN=YOR052C PE=1 SV=1	214560	377970	781270	2196900	0.561252	0.764353	0.662803	0.153861
_LAMPEQAHTS(ph)PTS(ph)RKSS(ph)DNQR_3	P13185	>sp|P13185|KIN1_YEAST Serine/threonine protein kinase KIN1 OS=Saccharomyces cerevisiae (strain ATCC 204508 / S288c) GN=KIN1 PE=1 SV=3	116710	198530	455070	1075200	0.59097	0.733663	0.662317	0.132752
_AS(ph)T(ph)AVES(ph)LDNHPPK_2	P25297	>sp|P25297|PHO84_YEAST Inorganic phosphate transporter PHO84 OS=Saccharomyces cerevisiae (strain ATCC 204508 / S288c) GN=PHO84 PE=1 SV=2	21163	285260	136750	931630	0.81035	0.514003	0.662176	0.193674
_LPPLPTTSNS(ph)NFNS(ph)R_2	P53901	>sp|P53901|INN1_YEAST Ingression protein 1 OS=Saccharomyces cerevisiae (strain ATCC 204508 / S288c) GN=INN1 PE=1 SV=1	28363	60999	134110	271780	0.674709	0.648895	0.661802	0.101986
_IDPDSST(ph)DKY(ph)LEIESSPLK_3	P13382	>sp|P13382|DPOA_YEAST DNA polymerase alpha catalytic subunit A OS=Saccharomyces cerevisiae (strain ATCC 204508 / S288c) GN=POL1 PE=1 SV=2	332200	52430	431580	850050	0.113662	1.20986	0.661763	0.210543
_ECS(ph)NPTCGAGVFLANHK_2	P05759	>sp|P05759|RS27A_YEAST Ubiquitin-40S ribosomal protein S31 OS=Saccharomyces cerevisiae (strain ATCC 204508 / S288c) GN=RPS31 PE=1 SV=3	436890	814050	1343800	5574500	0.487963	0.835555	0.661759	0.190077
_GLQFQNS(ph)SLK_2	P34226	>sp|P34226|SKT5_YEAST Protein SKT5 OS=Saccharomyces cerevisiae (strain ATCC 204508 / S288c) GN=SKT5 PE=1 SV=1	120190	705890	827440	2157100	0.837868	0.485133	0.661501	0.105653
_(ac)MEVAPALSTTQS(ph)DVAFQK_3	P32461	>sp|P32461|DPH2_YEAST Diphthamide biosynthesis protein 2 OS=Saccharomyces cerevisiae (strain ATCC 204508 / S288c) GN=DPH2 PE=1 SV=1	61918	161360	389800	538830	0.799025	0.523656	0.66134	0.0223412
_IAS(ph)PIQHEHDS(ph)GSR_3	P38427	>sp|P38427|TSL1_YEAST Trehalose synthase complex regulatory subunit TSL1 OS=Saccharomyces cerevisiae (strain ATCC 204508 / S288c) GN=TSL1 PE=1 SV=1	711870	4011100	3957300	15119000	0.744998	0.57626	0.660629	0.159517
_DFSEDLNS(ph)FDKQNAK_2	Q04773	>sp|Q04773|YMW4_YEAST Uncharacterized protein YMR074C OS=Saccharomyces cerevisiae (strain ATCC 204508 / S288c) GN=YMR074C PE=1 SV=1	184450	323870	614430	2036200	0.522594	0.79845	0.660522	0.171689
_NDS(ph)FNINTDTLKLENDINEK_3	Q08581	>sp|Q08581|SLK19_YEAST Kinetochore protein SLK19 OS=Saccharomyces cerevisiae (strain ATCC 204508 / S288c) GN=SLK19 PE=1 SV=1	235820	153700	806310	939380	0.533921	0.786167	0.660044	0.0500902
_ENPGVNS(ph)SNSGAVTR_2	Q03940	>sp|Q03940|RUVB1_YEAST RuvB-like protein 1 OS=Saccharomyces cerevisiae (strain ATCC 204508 / S288c) GN=RVB1 PE=1 SV=1	33417	63064	105840	416070	0.500682	0.819385	0.660034	0.185589
_DKT(ph)SDEILK_2	P33313	>sp|P33313|CNS1_YEAST Hsp70/Hsp90 co-chaperone CNS1 OS=Saccharomyces cerevisiae (strain ATCC 204508 / S288c) GN=CNS1 PE=1 SV=1	42572	94148	136210	613380	0.505085	0.813919	0.659502	0.193207
_KINT(ph)NETLPSSLSSPK_3	P18961	>sp|P18961|YPK2_YEAST Serine/threonine-protein kinase YPK2/YKR2 OS=Saccharomyces cerevisiae (strain ATCC 204508 / S288c) GN=YPK2 PE=1 SV=1	29675	2411200	843650	1767200	1.45377	-0.134948	0.659412	0.463057
_TGLNSS(ph)SSTIDFFK_2	P49956	>sp|P49956|CTF18_YEAST Chromosome transmission fidelity protein 18 OS=Saccharomyces cerevisiae (strain ATCC 204508 / S288c) GN=CTF18 PE=1 SV=1	84679	246660	503570	862620	0.774284	0.543721	0.659002	0.0598993
_KKSS(ph)YGSSNNDSYGSNNDDSYGSSNK_3	P18899	>sp|P18899|DDR48_YEAST Stress protein DDR48 OS=Saccharomyces cerevisiae (strain ATCC 204508 / S288c) GN=DDR48 PE=1 SV=4	131890	225430	469330	1316600	0.551266	0.766442	0.658854	0.154533
_TEIAS(ph)DHS(ph)KK_3	P35193	>sp|P35193|ATG19_YEAST Autophagy-related protein 19 OS=Saccharomyces cerevisiae (strain ATCC 204508 / S288c) GN=ATG19 PE=1 SV=1	199920	325590	961740	1406100	0.682201	0.635345	0.658773	0.0545223
_KDFS(ph)EDLNSFDK_2	Q04773	>sp|Q04773|YMW4_YEAST Uncharacterized protein YMR074C OS=Saccharomyces cerevisiae (strain ATCC 204508 / S288c) GN=YMR074C PE=1 SV=1	105120	703440	924210	1659400	0.944085	0.372724	0.658405	0.0244957
_AAPIVDDEETEFDIYNS(ph)K_2	P21524	>sp|P21524|RIR1_YEAST Ribonucleoside-diphosphate reductase large chain 1 OS=Saccharomyces cerevisiae (strain ATCC 204508 / S288c) GN=RNR1 PE=1 SV=2	226710	434250	968030	2107000	0.630418	0.685925	0.658171	0.117213
_GIFAGDINS(ph)D_2	Q01519	>sp|Q01519|COX12_YEAST Cytochrome c oxidase subunit 6B OS=Saccharomyces cerevisiae (strain ATCC 204508 / S288c) GN=COX12 PE=1 SV=2	57530	110120	192020	681860	0.523452	0.791829	0.657641	0.176461
_KPAS(ph)KAPAEK_3	P02294;P02293	>sp|P02294|H2B2_YEAST Histone H2B.2 OS=Saccharomyces cerevisiae (strain ATCC 204508 / S288c) GN=HTB2 PE=1 SV=2;>sp|P02293|H2B1_YEAST Histone H2B.1 OS=Saccharomyces cerevisiae (strain ATCC 204508 / S288c) GN=HTB1 PE=1 SV=2	382780	1576500	2610300	4775400	0.833741	0.481316	0.657528	0.0563833
_TKS(ph)LPNTIK_3	P27895	>sp|P27895|CIN8_YEAST Kinesin-like protein CIN8 OS=Saccharomyces cerevisiae (strain ATCC 204508 / S288c) GN=CIN8 PE=1 SV=3	19887	56060	95540	240020	0.681616	0.631594	0.656605	0.125807
_SGT(ph)GIS(ph)MTHDK_2	P34756	>sp|P34756|FAB1_YEAST 1-phosphatidylinositol 3-phosphate 5-kinase FAB1 OS=Saccharomyces cerevisiae (strain ATCC 204508 / S288c) GN=FAB1 PE=1 SV=3	58800	332750	574790	699040	0.990132	0.322384	0.656258	0.0534994
_FVDDS(ph)DT(ph)SYEEK_2	Q08951	>sp|Q08951|AP3D_YEAST AP-3 complex subunit delta OS=Saccharomyces cerevisiae (strain ATCC 204508 / S288c) GN=APL5 PE=1 SV=1	344170	43420	174830	1751900	-0.294157	1.60582	0.655831	0.281447
_YQLQPDDS(ph)HYDEEREASKLDPTSYEAY(ph)QQQTQQK_4	P23292	>sp|P23292|KC12_YEAST Casein kinase I homolog 2 OS=Saccharomyces cerevisiae (strain ATCC 204508 / S288c) GN=YCK2 PE=1 SV=1	128880	310950	390530	2096500	0.481469	0.828804	0.655137	0.203685
_AAAS(ph)TLEDIEVKDDEWAVDMSEEAIR_3	P38431	>sp|P38431|IF5_YEAST Eukaryotic translation initiation factor 5 OS=Saccharomyces cerevisiae (strain ATCC 204508 / S288c) GN=TIF5 PE=1 SV=1	270120	375880	1974800	1048500	0.863966	0.445519	0.654743	0.130373
_T(ph)FLRSDS(ph)FSTR_2	P43565	>sp|P43565|RIM15_YEAST Serine/threonine-protein kinase RIM15 OS=Saccharomyces cerevisiae (strain ATCC 204508 / S288c) GN=RIM15 PE=1 SV=1	32071	109530	184620	387170	0.760166	0.548369	0.654267	0.0900747
_NNS(ph)LPTTEAITR_2	Q04195	>sp|Q04195|SIZ1_YEAST E3 SUMO-protein ligase SIZ1 OS=Saccharomyces cerevisiae (strain ATCC 204508 / S288c) GN=SIZ1 PE=1 SV=1	108740	236280	408300	1277200	0.57459	0.732832	0.653711	0.160806
_HQQPVASSTVNS(ph)NKS(ph)STDIR_3	Q03497	>sp|Q03497|STE20_YEAST Serine/threonine-protein kinase STE20 OS=Saccharomyces cerevisiae (strain ATCC 204508 / S288c) GN=STE20 PE=1 SV=1	105540	2437200	1209300	4316900	1.05912	0.248281	0.653699	0.0809919
_TNNS(ph)S(ph)NRHS(ph)FR_3	P39935	>sp|P39935|IF4F1_YEAST Eukaryotic initiation factor 4F subunit p150 OS=Saccharomyces cerevisiae (strain ATCC 204508 / S288c) GN=TIF4631 PE=1 SV=2	153900	686190	720700	2967900	0.670516	0.636005	0.65326	0.172497
_INNLQDMSLDS(ph)DAHR_3	P09959	>sp|P09959|SWI6_YEAST Regulatory protein SWI6 OS=Saccharomyces cerevisiae (strain ATCC 204508 / S288c) GN=SWI6 PE=1 SV=1	52390	96948	191720	536400	0.563419	0.74295	0.653184	0.15227
_VT(ph)SNAAPTNFDENGEPLSEK_2	P40340	>sp|P40340|TBP7_YEAST Tat-binding homolog 7 OS=Saccharomyces cerevisiae (strain ATCC 204508 / S288c) GN=YTA7 PE=1 SV=2	43884	95440	164890	512460	0.574888	0.72993	0.652409	0.160105
_SRS(ph)IS(ph)PDEK_2	P53968	>sp|P53968|CRZ1_YEAST Transcriptional regulator CRZ1 OS=Saccharomyces cerevisiae (strain ATCC 204508 / S288c) GN=CRZ1 PE=1 SV=1	45033	314850	245510	1162200	0.736538	0.567177	0.651858	0.17605
_SLADQIS(ph)DIAIKPVNK_3	Q06631	>sp|Q06631|BFR2_YEAST Protein BFR2 OS=Saccharomyces cerevisiae (strain ATCC 204508 / S288c) GN=BFR2 PE=1 SV=1	120860	390380	582900	1626800	0.683311	0.619847	0.651579	0.136165
_TGQFGWS(ph)ANMER_2	P15108;P02829	>sp|P15108|HSC82_YEAST ATP-dependent molecular chaperone HSC82 OS=Saccharomyces cerevisiae (strain ATCC 204508 / S288c) GN=HSC82 PE=1 SV=4;>sp|P02829|HSP82_YEAST ATP-dependent molecular chaperone HSP82 OS=Saccharomyces cerevisiae (strain ATCC 204508 / S288	89936	95953	542710	318960	0.780634	0.521678	0.651156	0.104323
_QINENTS(ph)DLEDGVESITS(ph)DSK_3	P38084	>sp|P38084|BAP2_YEAST Leu/Val/Ile amino-acid permease OS=Saccharomyces cerevisiae (strain ATCC 204508 / S288c) GN=BAP2 PE=1 SV=2	2135900	210200	1857100	4843000	-0.0607456	1.36248	0.650868	0.269133
_TNNS(ph)STHVSK_3	P26570	>sp|P26570|PPZ1_YEAST Serine/threonine-protein phosphatase PP-Z1 OS=Saccharomyces cerevisiae (strain ATCC 204508 / S288c) GN=PPZ1 PE=1 SV=5	42723	118540	143780	705130	0.527037	0.774404	0.650721	0.195695
_S(ph)AS(ph)PVVGEHQEK_2	P13186	>sp|P13186|KIN2_YEAST Serine/threonine-protein kinase KIN2 OS=Saccharomyces cerevisiae (strain ATCC 204508 / S288c) GN=KIN2 PE=1 SV=3	131230	316760	642410	1295100	0.689779	0.611573	0.650676	0.0967392
_KVWLDPNET(ph)SEIAQANSR_3	P0CX82;P0CX83	>sp|P0CX82|RL19A_YEAST 60S ribosomal protein L19-A OS=Saccharomyces cerevisiae (strain ATCC 204508 / S288c) GN=RPL19A PE=1 SV=1;>sp|P0CX83|RL19B_YEAST 60S ribosomal protein L19-B OS=Saccharomyces cerevisiae (strain ATCC 204508 / S288c) GN=RPL19B PE=1 SV=1	149380	98030	937980	312460	0.797901	0.503435	0.650668	0.165491
_ENS(ph)NTFSVIQR_2	P07248	>sp|P07248|ADR1_YEAST Regulatory protein ADR1 OS=Saccharomyces cerevisiae (strain ATCC 204508 / S288c) GN=ADR1 PE=1 SV=2	86838	161820	252150	1114600	0.462949	0.838087	0.650518	0.195316
_LS(ph)MEEEQQR_2	P38886	>sp|P38886|RPN10_YEAST 26S proteasome regulatory subunit RPN10 OS=Saccharomyces cerevisiae (strain ATCC 204508 / S288c) GN=RPN10 PE=1 SV=3	193250	386080	819160	1807600	0.627249	0.670425	0.648837	0.117976
_KEGT(ph)PKTDS(ph)FIFDGTAK_3	Q12343	>sp|Q12343|MED4_YEAST Mediator of RNA polymerase II transcription subunit 4 OS=Saccharomyces cerevisiae (strain ATCC 204508 / S288c) GN=MED4 PE=1 SV=1	297070	503450	1218300	2425500	0.612895	0.682845	0.64787	0.107732
_SELTRQS(ph)LEK_2	Q07872	>sp|Q07872|ENT4_YEAST Epsin-4 OS=Saccharomyces cerevisiae (strain ATCC 204508 / S288c) GN=ENT4 PE=1 SV=1	55568	617690	447750	1512500	0.906211	0.388925	0.647568	0.118516
_TRS(ph)LS(ph)SQS(ph)FDNETSPAHPR_3	P40463	>sp|P40463|VHS2_YEAST Protein VHS2 OS=Saccharomyces cerevisiae (strain ATCC 204508 / S288c) GN=VHS2 PE=1 SV=1	132860	239620	483320	1295900	0.560841	0.733048	0.646944	0.148027
_QDS(ph)LTQLK_2	P36024	>sp|P36024|SIS2_YEAST Phosphopantothenoylcysteine decarboxylase subunit SIS2 OS=Saccharomyces cerevisiae (strain ATCC 204508 / S288c) GN=SIS2 PE=1 SV=1	50753	81571	157490	515480	0.491791	0.800676	0.646234	0.173224
_TDS(ph)FIFDGTAK_2	Q12343	>sp|Q12343|MED4_YEAST Mediator of RNA polymerase II transcription subunit 4 OS=Saccharomyces cerevisiae (strain ATCC 204508 / S288c) GN=MED4 PE=1 SV=1	227880	465620	980100	2119000	0.633564	0.658099	0.645832	0.114091
_SKNENRS(ph)PYER_3	Q06315	>sp|Q06315|SKG3_YEAST Protein SKG3 OS=Saccharomyces cerevisiae (strain ATCC 204508 / S288c) GN=SKG3 PE=1 SV=1	85843	134770	405070	556720	0.673825	0.616044	0.644934	0.0438367
_KSSFGSDGNTAYST(ph)PLNS(ph)PGLSK_3	P26570	>sp|P26570|PPZ1_YEAST Serine/threonine-protein phosphatase PP-Z1 OS=Saccharomyces cerevisiae (strain ATCC 204508 / S288c) GN=PPZ1 PE=1 SV=5	176290	488630	879010	1907400	0.697766	0.591462	0.644614	0.103615
_LMTSIS(ph)LT(ph)PR_2	P43565	>sp|P43565|RIM15_YEAST Serine/threonine-protein kinase RIM15 OS=Saccharomyces cerevisiae (strain ATCC 204508 / S288c) GN=RIM15 PE=1 SV=1	25938	30454	118930	128440	0.661355	0.625056	0.643205	0.00832178
_INS(ph)ASQTEGDELKSEQTQPK_2	P17629	>sp|P17629|HPR1_YEAST THO complex subunit HPR1 OS=Saccharomyces cerevisiae (strain ATCC 204508 / S288c) GN=HPR1 PE=1 SV=2	36377	21563	53961	279510	0.171253	1.11269	0.641971	0.228335
_FYNSGVSPT(ph)DNSRIS(ph)LSR_3	P38426	>sp|P38426|TPS3_YEAST Trehalose synthase complex regulatory subunit TPS3 OS=Saccharomyces cerevisiae (strain ATCC 204508 / S288c) GN=TPS3 PE=1 SV=3	45246	175780	233130	655470	0.712018	0.571583	0.641801	0.131171
_LFGTNPIAET(ph)EES(ph)GNEKEEESSK_3	Q08208	>sp|Q08208|NOP12_YEAST Nucleolar protein 12 OS=Saccharomyces cerevisiae (strain ATCC 204508 / S288c) GN=NOP12 PE=1 SV=1	33797	2013100	666940	1953300	1.29521	-0.0130964	0.641056	0.279975
_ELLTS(ph)ASSGSGGGAGIGFDVAR_3	P39729	>sp|P39729|RBG1_YEAST Ribosome-interacting GTPase 1 OS=Saccharomyces cerevisiae (strain ATCC 204508 / S288c) GN=RBG1 PE=1 SV=1	33638	115830	179200	415510	0.726508	0.55476	0.640634	0.106072
_S(ph)INTQGENDYYQQVQR_2	Q12136	>sp|Q12136|SAS10_YEAST Something about silencing protein 10 OS=Saccharomyces cerevisiae (strain ATCC 204508 / S288c) GN=SAS10 PE=1 SV=1	43189	112090	176110	524300	0.610411	0.670013	0.640212	0.150709
_NIDVS(ph)NLPSLA_2	P39015	>sp|P39015|STM1_YEAST Suppressor protein STM1 OS=Saccharomyces cerevisiae (strain ATCC 204508 / S288c) GN=STM1 PE=1 SV=3	55582	153580	251040	647190	0.654809	0.624697	0.639753	0.129987
_LSQFNS(ph)FLK_2	Q06245	>sp|Q06245|SEC10_YEAST Exocyst complex component SEC10 OS=Saccharomyces cerevisiae (strain ATCC 204508 / S288c) GN=SEC10 PE=1 SV=1	157420	361950	686650	1577700	0.639676	0.639376	0.639526	0.119311
_ADS(ph)FTKEELTQFR_3	Q07657	>sp|Q07657|SHS1_YEAST Seventh homolog of septin 1 OS=Saccharomyces cerevisiae (strain ATCC 204508 / S288c) GN=SHS1 PE=1 SV=1	209680	530730	994100	2126300	0.675873	0.602751	0.639312	0.104557
_SEGS(ph)GS(ph)SLVQK_2	P25441	>sp|P25441|RPC4_YEAST DNA-directed RNA polymerase III subunit RPC4 OS=Saccharomyces cerevisiae (strain ATCC 204508 / S288c) GN=RPC53 PE=1 SV=2	415670	968330	1694000	4504700	0.610165	0.667642	0.638904	0.139589
_(ac)SQDAAIAEQT(ph)PVEHLSAVDSASHS(ph)VLSTPS(ph)NKAER_4	P39004;P39003	>sp|P39004|HXT7_YEAST High-affinity hexose transporter HXT6 OS=Saccharomyces cerevisiae (strain ATCC 204508 / S288c) GN=HXT7 PE=1 SV=1;>sp|P39003|HXT6_YEAST High-affinity hexose transporter HXT6 OS=Saccharomyces cerevisiae (strain ATCC 204508 / S288c) GN=H	222370	549700	151630	15277000	-0.166291	1.44391	0.638811	0.251529
_ELES(ph)QDRPDAVNTQSQFISK_3	Q07807	>sp|Q07807|PUF3_YEAST mRNA-binding protein PUF3 OS=Saccharomyces cerevisiae (strain ATCC 204508 / S288c) GN=PUF3 PE=1 SV=1	54786	185820	232870	826560	0.628444	0.648182	0.638313	0.163709
_SKDFSS(ph)VSTR_2	P38080	>sp|P38080|AKL1_YEAST Serine/threonine-protein kinase AKL1 OS=Saccharomyces cerevisiae (strain ATCC 204508 / S288c) GN=AKL1 PE=1 SV=1	18058	41116	82997	169010	0.662393	0.613902	0.638147	0.100447
_RRSQSIS(ph)DEK_3	P25302	>sp|P25302|SWI4_YEAST Regulatory protein SWI4 OS=Saccharomyces cerevisiae (strain ATCC 204508 / S288c) GN=SWI4 PE=1 SV=2	122180	41858	191320	504210	0.19476	1.08083	0.637797	0.20275
_FNDS(ph)GEGDHVSDQR_3	P36009	>sp|P36009|DHR2_YEAST Probable ATP-dependent RNA helicase DHR2 OS=Saccharomyces cerevisiae (strain ATCC 204508 / S288c) GN=DHR2 PE=1 SV=1	41940	76671	125820	480670	0.477121	0.797216	0.637169	0.184837
_LTTTNS(ph)S(ph)SMSQLR_2	P53191	>sp|P53191|PIB2_YEAST Phosphatidylinositol 3-phosphate-binding protein 2 OS=Saccharomyces cerevisiae (strain ATCC 204508 / S288c) GN=PIB2 PE=1 SV=1	23721	127250	185010	306450	0.892062	0.381702	0.636882	0.0167289
_S(ph)LSSQNIDADDPTQFENLK_3	P11075	>sp|P11075|SEC7_YEAST Protein transport protein SEC7 OS=Saccharomyces cerevisiae (strain ATCC 204508 / S288c) GN=SEC7 PE=1 SV=2	95131	310300	495430	1118900	0.71666	0.557009	0.636835	0.103679
_PAS(ph)GGLFGQSAGSK_2	Q02630	>sp|Q02630|NU116_YEAST Nucleoporin NUP116/NSP116 OS=Saccharomyces cerevisiae (strain ATCC 204508 / S288c) GN=NUP116 PE=1 SV=2	33886	77639	132810	371740	0.59321	0.680159	0.636685	0.146717
_S(ph)ADASIPTISNIK_2	Q03361	>sp|Q03361|JIP4_YEAST Uncharacterized protein JIP4 OS=Saccharomyces cerevisiae (strain ATCC 204508 / S288c) GN=JIP4 PE=1 SV=2	62860	347500	381290	1074900	0.782881	0.490413	0.636647	0.118655
_FSGT(ph)VSSDVFK_2	P32499	>sp|P32499|NUP2_YEAST Nucleoporin NUP2 OS=Saccharomyces cerevisiae (strain ATCC 204508 / S288c) GN=NUP2 PE=1 SV=2	211300	370730	631900	2321600	0.475749	0.79673	0.636239	0.182408
_SEGS(ph)GSSLVQK_2	P25441	>sp|P25441|RPC4_YEAST DNA-directed RNA polymerase III subunit RPC4 OS=Saccharomyces cerevisiae (strain ATCC 204508 / S288c) GN=RPC53 PE=1 SV=2	427530	1944600	2248500	6903500	0.720926	0.550239	0.635583	0.137979
_S(ph)SSHIGSVSNSSSSDR_3	P22211	>sp|P22211|NPR1_YEAST Nitrogen permease reactivator protein OS=Saccharomyces cerevisiae (strain ATCC 204508 / S288c) GN=NPR1 PE=1 SV=2	28076	1158300	561870	1079300	1.3013	-0.0306789	0.635311	0.296769
_LVQKPT(ph)AAGSKIDPSSDIANLK_3	P15891	>sp|P15891|ABP1_YEAST Actin-binding protein OS=Saccharomyces cerevisiae (strain ATCC 204508 / S288c) GN=ABP1 PE=1 SV=4	86494	288920	416210	1118500	0.682327	0.587858	0.635092	0.129582
_FNNHNQS(ph)NS(ph)NR_2	P39936	>sp|P39936|IF4F2_YEAST Eukaryotic initiation factor 4F subunit p130 OS=Saccharomyces cerevisiae (strain ATCC 204508 / S288c) GN=TIF4632 PE=1 SV=1	21096	110950	39489	1103200	0.272276	0.997527	0.634901	0.2441
_AAGS(ph)YYVEAQHK_2	P05737;Q12213	>sp|P05737|RL7A_YEAST 60S ribosomal protein L7-A OS=Saccharomyces cerevisiae (strain ATCC 204508 / S288c) GN=RPL7A PE=1 SV=3;>sp|Q12213|RL7B_YEAST 60S ribosomal protein L7-B OS=Saccharomyces cerevisiae (strain ATCC 204508 / S288c) GN=RPL7B PE=1 SV=3	63892	88232	214860	488040	0.526709	0.742829	0.634769	0.135074
_NDSSS(ph)S(ph)DTTQGSSFLENISR_2	P22470	>sp|P22470|SAN1_YEAST Protein SAN1 OS=Saccharomyces cerevisiae (strain ATCC 204508 / S288c) GN=SAN1 PE=1 SV=1	60018	57458	227010	282110	0.577763	0.691068	0.634416	0.0465291
_DRS(ph)LIIDNLK_2	P38213	>sp|P38213|DSF2_YEAST Protein DSF2 OS=Saccharomyces cerevisiae (strain ATCC 204508 / S288c) GN=DSF2 PE=1 SV=2	47790	211050	287960	650130	0.779995	0.488615	0.634305	0.0906779
_LEQKLS(ph)AIS(ph)SQDLPSNNTHNK_3	Q99247	>sp|Q99247|YO087_YEAST Uncharacterized WD repeat-containing protein YOL087C OS=Saccharomyces cerevisiae (strain ATCC 204508 / S288c) GN=YOL087C PE=1 SV=1	168160	415570	632960	2048200	0.575654	0.692728	0.634191	0.161715
_SKS(ph)SGVS(ph)SPLLSR_2	P39956	>sp|P39956|RPH1_YEAST DNA damage-responsive transcriptional repressor RPH1 OS=Saccharomyces cerevisiae (strain ATCC 204508 / S288c) GN=RPH1 PE=1 SV=1	209080	333620	515120	2511500	0.391596	0.876681	0.634139	0.205561
_QANIFNATAS(ph)NPFGF_2	P32790	>sp|P32790|SLA1_YEAST Actin cytoskeleton-regulatory complex protein SLA1 OS=Saccharomyces cerevisiae (strain ATCC 204508 / S288c) GN=SLA1 PE=1 SV=1	9933.9	40908	68195	110520	0.836633	0.431633	0.634133	0.0281815
_QKES(ph)EGCITTLK_3	Q12494	>sp|Q12494|KCS1_YEAST Inositol hexakisphosphate kinase 1 OS=Saccharomyces cerevisiae (strain ATCC 204508 / S288c) GN=KCS1 PE=1 SV=1	169070	914890	654270	4373600	0.58769	0.67947	0.63358	0.205636
_KVS(ph)VGSM(ox)GSGK_2	Q07653	>sp|Q07653|HBT1_YEAST Protein HBT1 OS=Saccharomyces cerevisiae (strain ATCC 204508 / S288c) GN=HBT1 PE=1 SV=1	27226	83915	35449	1183200	0.11462	1.14922	0.631919	0.247619
_DRS(ph)GSGTPFFETSLGR_3	Q12072	>sp|Q12072|IOC2_YEAST ISWI one complex protein 2 OS=Saccharomyces cerevisiae (strain ATCC 204508 / S288c) GN=IOC2 PE=1 SV=1	27348	100920	131980	383880	0.683583	0.580218	0.6319	0.13726
_RNS(ph)TQEVGEPIPR_3	Q12192	>sp|Q12192|RFM1_YEAST Repression factor of MSEs protein 1 OS=Saccharomyces cerevisiae (strain ATCC 204508 / S288c) GN=RFM1 PE=1 SV=1	58427	160150	223760	767000	0.583169	0.680268	0.631719	0.165333
_VFEGVLDDTKS(ph)FR_3	P53981	>sp|P53981|YNB0_YEAST Uncharacterized phosphatase YNL010W OS=Saccharomyces cerevisiae (strain ATCC 204508 / S288c) GN=YNL010W PE=1 SV=1	50293	122420	208710	540590	0.618036	0.645016	0.631526	0.134731
_GES(ph)YQSAEQEIDHTAPEK_3	Q06146	>sp|Q06146|YL257_YEAST Uncharacterized protein YLR257W OS=Saccharomyces cerevisiae (strain ATCC 204508 / S288c) GN=YLR257W PE=1 SV=1	3231700	23006000	20952000	65009000	0.811794	0.451132	0.631463	0.122922
_(ac)SQDAAIAEQT(ph)PVEHLSAVDSASHSVLS(ph)TPSNK_3	P39004;P39003	>sp|P39004|HXT7_YEAST High-affinity hexose transporter HXT6 OS=Saccharomyces cerevisiae (strain ATCC 204508 / S288c) GN=HXT7 PE=1 SV=1;>sp|P39003|HXT6_YEAST High-affinity hexose transporter HXT6 OS=Saccharomyces cerevisiae (strain ATCC 204508 / S288c) GN=H	331130	515540	502660	6168600	0.181276	1.07792	0.6296	0.240345
_SETPNSEFS(ph)SNSLQHCNSR_3	P23493	>sp|P23493|MBR1_YEAST Mitochondrial biogenesis regulation protein 1 OS=Saccharomyces cerevisiae (strain ATCC 204508 / S288c) GN=MBR1 PE=1 SV=2	39971	96566	119220	587900	0.474604	0.784479	0.629542	0.199097
_S(ph)ASFDNNNVNGNGNNTNR_2	P40494	>sp|P40494|PRK1_YEAST Actin-regulating kinase PRK1 OS=Saccharomyces cerevisiae (strain ATCC 204508 / S288c) GN=PRK1 PE=1 SV=1	122780	231610	352010	1464400	0.457427	0.800902	0.629165	0.19148
_S(ph)TTEPIQLNNK_2	P0CX70;P0CX71;P0CX72;P0CX73;Q03612;P0C2I7;P0C2I5;Q12414;P0C2I3;Q12273;P47098;Q03434;P0C2I6;P0C2J1;Q07793;Q04670;Q92393;Q12316;Q12193	>sp|P0CX70|YD15A_YEAST Transposon Ty1-DR6 Gag polyprotein OS=Saccharomyces cerevisiae (strain ATCC 204508 / S288c) GN=TY1A-DR6 PE=2 SV=1;>sp|P0CX71|YE11A_YEAST Transposon Ty1-ER1 Gag polyprotein OS=Saccharomyces cerevisiae (strain ATCC 204508 / S288c) GN=T	220300	79845	340050	936430	0.188528	1.06923	0.628878	0.205787
_YSSS(ph)FSGVNANR_2	P39875	>sp|P39875|EXO1_YEAST Exodeoxyribonuclease 1 OS=Saccharomyces cerevisiae (strain ATCC 204508 / S288c) GN=EXO1 PE=1 SV=2	43986	150220	166600	717470	0.578361	0.679076	0.628718	0.182238
_FFNQGYNTTLS(ph)THER_3	P38691	>sp|P38691|KSP1_YEAST Serine/threonine-protein kinase KSP1 OS=Saccharomyces cerevisiae (strain ATCC 204508 / S288c) GN=KSP1 PE=1 SV=1	23017	130430	149080	363400	0.811371	0.445007	0.628189	0.0921201
_IIKPNDS(ph)YIK_3	P23287	>sp|P23287|PP2B1_YEAST Serine/threonine-protein phosphatase 2B catalytic subunit A1 OS=Saccharomyces cerevisiae (strain ATCC 204508 / S288c) GN=CNA1 PE=1 SV=2	26118	158740	135390	552450	0.714647	0.541607	0.628127	0.163824
_KAS(ph)ET(ph)SDQNIVK_2	P53254	>sp|P53254|UTP22_YEAST U3 small nucleolar RNA-associated protein 22 OS=Saccharomyces cerevisiae (strain ATCC 204508 / S288c) GN=UTP22 PE=1 SV=1	335720	170310	626670	1644000	0.271062	0.984662	0.627862	0.187954
_DLS(ph)SEVVGQMDAIK_3	P31539	>sp|P31539|HS104_YEAST Heat shock protein 104 OS=Saccharomyces cerevisiae (strain ATCC 204508 / S288c) GN=HSP104 PE=1 SV=2	26580	33854	111240	145050	0.621706	0.631908	0.626807	0.0428659
_AGNRPTS(ph)AATS(ph)LVNR_2	P38427	>sp|P38427|TSL1_YEAST Trehalose synthase complex regulatory subunit TSL1 OS=Saccharomyces cerevisiae (strain ATCC 204508 / S288c) GN=TSL1 PE=1 SV=1	77464	174420	272370	888570	0.546059	0.707095	0.626577	0.165192
_S(ph)DSASFLEEKEEPQENHDNKEEQS_4	P38199	>sp|P38199|HEK2_YEAST Heterogeneous nuclear rnp K-like protein 2 OS=Saccharomyces cerevisiae (strain ATCC 204508 / S288c) GN=HEK2 PE=1 SV=1	2043400	3350500	7259800	16879000	0.550571	0.702237	0.626404	0.132856
_SPS(ph)AFNR_2	P38427	>sp|P38427|TSL1_YEAST Trehalose synthase complex regulatory subunit TSL1 OS=Saccharomyces cerevisiae (strain ATCC 204508 / S288c) GN=TSL1 PE=1 SV=1	64107	295120	310860	1089000	0.685659	0.567029	0.626344	0.154076
_YADKHGEGS(ph)FR_3	Q12040	>sp|Q12040|YO283_YEAST Broad-specificity phosphatase YOR283W OS=Saccharomyces cerevisiae (strain ATCC 204508 / S288c) GN=YOR283W PE=1 SV=1	56530	39863	226670	177530	0.603115	0.648702	0.625908	0.0334573
_RS(ph)S(ph)ES(ph)IGDLPHR_3	P46675	>sp|P46675|STU2_YEAST Protein STU2 OS=Saccharomyces cerevisiae (strain ATCC 204508 / S288c) GN=STU2 PE=1 SV=1	69689	318770	291130	1362600	0.620923	0.630891	0.625907	0.183459
_S(ph)S(ph)SNSSVTSTGQSSR_2	Q08422	>sp|Q08422|YO052_YEAST AN1-type zinc finger protein YOR052C OS=Saccharomyces cerevisiae (strain ATCC 204508 / S288c) GN=YOR052C PE=1 SV=1	39950	76315	136000	399960	0.532022	0.719407	0.625714	0.158169
_EILPTIPHNDQPILAS(ph)SDKSNGTLK_3	P47035	>sp|P47035|NET1_YEAST Nucleolar protein NET1 OS=Saccharomyces cerevisiae (strain ATCC 204508 / S288c) GN=NET1 PE=1 SV=1	126020	438520	563500	1741300	0.650454	0.598884	0.624669	0.146876
_LEDVDDDDIEEES(ph)T(ph)SSKESK_3	Q12176	>sp|Q12176|MAK21_YEAST Ribosome biogenesis protein MAK21 OS=Saccharomyces cerevisiae (strain ATCC 204508 / S288c) GN=MAK21 PE=1 SV=1	193400	397160	540410	2515900	0.446267	0.801728	0.623997	0.198326
_GGLAYS(ph)FR_2	P53252	>sp|P53252|PIL1_YEAST Sphingolipid long chain base-responsive protein PIL1 OS=Saccharomyces cerevisiae (strain ATCC 204508 / S288c) GN=PIL1 PE=1 SV=1	539780	1392900	2220000	5985400	0.614136	0.633173	0.623655	0.138358
_NS(ph)LNHS(ph)NS(ph)TLNVGPSR_3	P40357	>sp|P40357|SEC9_YEAST Protein transport protein SEC9 OS=Saccharomyces cerevisiae (strain ATCC 204508 / S288c) GN=SEC9 PE=1 SV=1	53182	279180	281570	930960	0.723822	0.523047	0.623434	0.142718
_TNS(ph)ATLPSSESSPASPDLKLS(ph)R_3	P32047	>sp|P32047|MLF3_YEAST Protein MLF3 OS=Saccharomyces cerevisiae (strain ATCC 204508 / S288c) GN=MLF3 PE=1 SV=2	360670	1216000	1861800	4150900	0.712823	0.533209	0.623016	0.0995076
_NMQNTQRDS(ph)FASTK_3	P39936	>sp|P39936|IF4F2_YEAST Eukaryotic initiation factor 4F subunit p130 OS=Saccharomyces cerevisiae (strain ATCC 204508 / S288c) GN=TIF4632 PE=1 SV=1	100820	240300	537310	793240	0.726678	0.518651	0.622665	0.0372916
_(ac)SAEIEEATNAVNNLS(ph)INDSEQQPR_3	P10080	>sp|P10080|SSBP1_YEAST Single-stranded nucleic acid-binding protein OS=Saccharomyces cerevisiae (strain ATCC 204508 / S288c) GN=SBP1 PE=1 SV=2	223910	298300	718720	1634200	0.506486	0.738652	0.622569	0.137087
_INS(ph)ASQTEGDELKSEQTQPK_3	P17629	>sp|P17629|HPR1_YEAST THO complex subunit HPR1 OS=Saccharomyces cerevisiae (strain ATCC 204508 / S288c) GN=HPR1 PE=1 SV=2	419740	585370	974240	4415100	0.365686	0.87751	0.621598	0.204231
_NLLMQLSDHS(ph)NGS(ph)LEK_3	Q01448	>sp|Q01448|HPC2_YEAST Histone promoter control protein 2 OS=Saccharomyces cerevisiae (strain ATCC 204508 / S288c) GN=HPC2 PE=1 SV=2	28555	91270	178720	255130	0.796491	0.446433	0.621462	0.0138731
_SNNTS(ph)FFDVWGK_2	P11075	>sp|P11075|SEC7_YEAST Protein transport protein SEC7 OS=Saccharomyces cerevisiae (strain ATCC 204508 / S288c) GN=SEC7 PE=1 SV=2	30340	44662	186660	126890	0.789036	0.453489	0.621262	0.0958587
_NNS(ph)SSFDISNNK_2	P53883	>sp|P53883|NOP13_YEAST Nucleolar protein 13 OS=Saccharomyces cerevisiae (strain ATCC 204508 / S288c) GN=NOP13 PE=1 SV=2	1711000	3464300	5983200	17271000	0.543684	0.697702	0.620693	0.15448
_DSS(ph)ATPSS(ph)R_2	Q06505	>sp|Q06505|IWS1_YEAST Transcription factor SPN1 OS=Saccharomyces cerevisiae (strain ATCC 204508 / S288c) GN=SPN1 PE=1 SV=1	148170	415810	1197700	893670	0.907588	0.332282	0.619935	0.113999
_YLLPNKS(ph)NDNVR_2	Q04749	>sp|Q04749|AVO2_YEAST Target of rapamycin complex 2 subunit AVO2 OS=Saccharomyces cerevisiae (strain ATCC 204508 / S288c) GN=AVO2 PE=1 SV=1	108440	312860	380290	1547200	0.544925	0.694196	0.619561	0.180997
_RPLETETENS(ph)FDGDK_3	P53255	>sp|P53255|DRN1_YEAST CWF19-like protein DRN1 OS=Saccharomyces cerevisiae (strain ATCC 204508 / S288c) GN=DRN1 PE=1 SV=1	44673	169360	165980	788150	0.570011	0.667798	0.618904	0.18838
_LQLES(ph)VPDLK_2	Q08581	>sp|Q08581|SLK19_YEAST Kinetochore protein SLK19 OS=Saccharomyces cerevisiae (strain ATCC 204508 / S288c) GN=SLK19 PE=1 SV=1	88569	207090	391670	809570	0.645639	0.592095	0.618867	0.101631
_KHT(ph)AEDELEDTPSDGIEEHLSAR_4	Q02554	>sp|Q02554|CUS1_YEAST Cold sensitive U2 snRNA suppressor 1 OS=Saccharomyces cerevisiae (strain ATCC 204508 / S288c) GN=CUS1 PE=1 SV=1	158000	659230	1066900	1683600	0.829467	0.407202	0.618334	0.0189894
_(ac)S(ph)GYFSGFSLNK_2	Q06523	>sp|Q06523|YP148_YEAST Uncharacterized protein YPR148C OS=Saccharomyces cerevisiae (strain ATCC 204508 / S288c) GN=YPR148C PE=1 SV=1	25700	59700	116360	227310	0.655871	0.580644	0.618257	0.0921728
_(ac)ADQENS(ph)PLHTVGFDAR_2	Q01519	>sp|Q01519|COX12_YEAST Cytochrome c oxidase subunit 6B OS=Saccharomyces cerevisiae (strain ATCC 204508 / S288c) GN=COX12 PE=1 SV=2	105640	156780	273080	1043300	0.412462	0.823119	0.61779	0.19058
_AS(ph)SLVSLSSSSATPSTSR_2	P21538	>sp|P21538|REB1_YEAST DNA-binding protein REB1 OS=Saccharomyces cerevisiae (strain ATCC 204508 / S288c) GN=REB1 PE=1 SV=2	434210	966090	1635800	4374900	0.57603	0.655951	0.61599	0.142126
_TIEQTS(ph)VNS(ph)NNS(ph)INKPVQK_3	P13185	>sp|P13185|KIN1_YEAST Serine/threonine protein kinase KIN1 OS=Saccharomyces cerevisiae (strain ATCC 204508 / S288c) GN=KIN1 PE=1 SV=3	196500	271970	519190	1753200	0.421964	0.80931	0.615637	0.181722
_DSSMSS(ph)YMSSK_2	P15108;P02829	>sp|P15108|HSC82_YEAST ATP-dependent molecular chaperone HSC82 OS=Saccharomyces cerevisiae (strain ATCC 204508 / S288c) GN=HSC82 PE=1 SV=4;>sp|P02829|HSP82_YEAST ATP-dependent molecular chaperone HSP82 OS=Saccharomyces cerevisiae (strain ATCC 204508 / S288	171890	189220	746280	741190	0.637651	0.592963	0.615307	0.00633507
_ENT(ph)EGEYSGIEHIVCPGVVQSIK_3	P28241	>sp|P28241|IDH2_YEAST Isocitrate dehydrogenase [NAD] subunit 2, mitochondrial OS=Saccharomyces cerevisiae (strain ATCC 204508 / S288c) GN=IDH2 PE=1 SV=1	301170	723430	1130400	3273000	0.57442	0.655549	0.614985	0.149907
_DLS(ph)VDEFK_2	Q08981	>sp|Q08981|ACM1_YEAST APC/C-CDH1 modulator 1 OS=Saccharomyces cerevisiae (strain ATCC 204508 / S288c) GN=ACM1 PE=1 SV=1	18906	143460	113870	402130	0.77981	0.447636	0.613723	0.138003
_LVSQDS(ph)ASPLSLTFR_2	P53250	>sp|P53250|TWF1_YEAST Twinfilin-1 OS=Saccharomyces cerevisiae (strain ATCC 204508 / S288c) GN=TWF1 PE=1 SV=1	979460	1730700	3557300	8044300	0.560134	0.667266	0.6137	0.12661
_DANIKPVVNAAVNDNQS(ph)KVS(ph)VATEQTK_3	P38250	>sp|P38250|IST2_YEAST Increased sodium tolerance protein 2 OS=Saccharomyces cerevisiae (strain ATCC 204508 / S288c) GN=IST2 PE=1 SV=2	520320	1426200	2015200	6199500	0.588048	0.638176	0.613112	0.153393
_LSAVPM(ox)TQTPS(ph)QCLSCVHAQK_3	P38314	>sp|P38314|SDS24_YEAST Protein SDS24 OS=Saccharomyces cerevisiae (strain ATCC 204508 / S288c) GN=SDS24 PE=1 SV=1	61625	605810	222990	2817900	0.558528	0.667589	0.613059	0.226821
_HFSES(ph)NKR_2	Q12263	>sp|Q12263|GIN4_YEAST Serine/threonine-protein kinase GIN4 OS=Saccharomyces cerevisiae (strain ATCC 204508 / S288c) GN=GIN4 PE=1 SV=1	42286	1538800	974280	1122200	1.36249	-0.137112	0.612688	0.383803
_AALLS(ph)SGNVK_2	P39730	>sp|P39730|IF2P_YEAST Eukaryotic translation initiation factor 5B OS=Saccharomyces cerevisiae (strain ATCC 204508 / S288c) GN=FUN12 PE=1 SV=2	149390	533230	701550	1902500	0.671737	0.55241	0.612074	0.12799
_ILS(ph)TGRK_2	P0CX49;P0CX50	>sp|P0CX49|RL18A_YEAST 60S ribosomal protein L18-A OS=Saccharomyces cerevisiae (strain ATCC 204508 / S288c) GN=RPL18A PE=1 SV=1;>sp|P0CX50|RL18B_YEAST 60S ribosomal protein L18-B OS=Saccharomyces cerevisiae (strain ATCC 204508 / S288c) GN=RPL18B PE=1 SV=1	157640	151650	424420	942980	0.430129	0.79366	0.611895	0.146498
_TITVGDAVS(ph)ETELENK_2	P53049	>sp|P53049|YOR1_YEAST Oligomycin resistance ATP-dependent permease YOR1 OS=Saccharomyces cerevisiae (strain ATCC 204508 / S288c) GN=YOR1 PE=1 SV=1	2381300	43490	780640	2220800	-0.484363	1.70812	0.611878	0.451787
_NS(ph)SDLLNQLINGR_2	P34909	>sp|P34909|NOT4_YEAST General negative regulator of transcription subunit 4 OS=Saccharomyces cerevisiae (strain ATCC 204508 / S288c) GN=MOT2 PE=1 SV=1	59811	150270	266030	565060	0.64815	0.575222	0.611686	0.103139
_KFNIS(ph)EGDITK_2	P53840	>sp|P53840|TOF1_YEAST Topoisomerase 1-associated factor 1 OS=Saccharomyces cerevisiae (strain ATCC 204508 / S288c) GN=TOF1 PE=1 SV=1	58649	84819	168980	492110	0.459575	0.763569	0.611572	0.165794
_NNNT(ph)SQISSTNTPDVIDLK_3	Q12386	>sp|Q12386|ARP8_YEAST Actin-like protein ARP8 OS=Saccharomyces cerevisiae (strain ATCC 204508 / S288c) GN=ARP8 PE=1 SV=1	63839	130670	235570	591720	0.567034	0.65594	0.611487	0.136504
_LEGIDVFDTKPLDSS(ph)R_3	P04037	>sp|P04037|COX4_YEAST Cytochrome c oxidase subunit 4, mitochondrial OS=Saccharomyces cerevisiae (strain ATCC 204508 / S288c) GN=COX4 PE=1 SV=1	56199	221080	284260	729680	0.703987	0.518583	0.611285	0.115823
_RANSNEDGES(ph)VSS(ph)IQES(ph)PK_3	P34216	>sp|P34216|EDE1_YEAST EH domain-containing and endocytosis protein 1 OS=Saccharomyces cerevisiae (strain ATCC 204508 / S288c) GN=EDE1 PE=1 SV=2	136430	3795100	2326500	3713900	1.23179	-0.00939302	0.6112	0.261796
_FGSGNS(ph)FS(ph)SLDKPIPQSR_3	P48415	>sp|P48415|SEC16_YEAST COPII coat assembly protein SEC16 OS=Saccharomyces cerevisiae (strain ATCC 204508 / S288c) GN=SEC16 PE=1 SV=2	361730	549210	1104600	3000600	0.484821	0.73747	0.611145	0.156339
_RSS(ph)FNSHAPTEPIS(ph)R_3	P34219	>sp|P34219|TOD6_YEAST Transcriptional regulatory protein TOD6 OS=Saccharomyces cerevisiae (strain ATCC 204508 / S288c) GN=TOD6 PE=1 SV=1	103010	478820	665930	1233100	0.810549	0.410826	0.610688	0.0459221
_GDLNANSNAAS(ph)ASNS(ph)TDNKSETFNK_3	P29295	>sp|P29295|HRR25_YEAST Casein kinase I homolog HRR25 OS=Saccharomyces cerevisiae (strain ATCC 204508 / S288c) GN=HRR25 PE=1 SV=1	105420	172150	271020	1107000	0.410078	0.808241	0.609159	0.194193
_S(ph)YTS(ph)VAELNR_2	Q06146	>sp|Q06146|YL257_YEAST Uncharacterized protein YLR257W OS=Saccharomyces cerevisiae (strain ATCC 204508 / S288c) GN=YLR257W PE=1 SV=1	21289	120080	111220	379350	0.718028	0.499569	0.608799	0.143724
_IRDSDSVLPNANTADHNNTNSGGEPINS(ph)SVAS(ph)NDIIEEK_4	P36027	>sp|P36027|MID2_YEAST Cell wall integrity sensor MID2 OS=Saccharomyces cerevisiae (strain ATCC 204508 / S288c) GN=MID2 PE=1 SV=1	186280	2829400	2107700	4124500	1.05364	0.163677	0.60866	0.0612152
_DNFS(ph)LLGEK_2	P32327	>sp|P32327|PYC2_YEAST Pyruvate carboxylase 2 OS=Saccharomyces cerevisiae (strain ATCC 204508 / S288c) GN=PYC2 PE=1 SV=2	77069	158320	270160	744260	0.544741	0.672189	0.608465	0.148671
_GSS(ph)SFGNDDINNNDDDDDANEDDESAYLTK_3	P43612	>sp|P43612|SA155_YEAST SIT4-associating protein SAP155 OS=Saccharomyces cerevisiae (strain ATCC 204508 / S288c) GN=SAP155 PE=1 SV=4	196520	130590	369540	1141700	0.274255	0.941642	0.607948	0.196054
_HT(ph)S(ph)ISSNMTENIGPGSVPK_3	P38165	>sp|P38165|RTG3_YEAST Retrograde regulation protein 3 OS=Saccharomyces cerevisiae (strain ATCC 204508 / S288c) GN=RTG3 PE=1 SV=2	44879	115270	279920	303780	0.794991	0.420843	0.607917	0.0348296
_KRPT(ph)SPS(ph)ISGSGSGGNSPSSSAGAR_3	P47116	>sp|P47116|PTK2_YEAST Serine/threonine-protein kinase PTK2/STK2 OS=Saccharomyces cerevisiae (strain ATCC 204508 / S288c) GN=PTK2 PE=1 SV=1	746540	446130	1396000	3917100	0.271832	0.943503	0.607668	0.191121
_KQNS(ph)PTTYGASR_3	P38439	>sp|P38439|LEO1_YEAST RNA polymerase-associated protein LEO1 OS=Saccharomyces cerevisiae (strain ATCC 204508 / S288c) GN=LEO1 PE=1 SV=1	127430	2759700	1590100	3629100	1.09615	0.118937	0.607545	0.0792948
_AGEQRPVYFYCGDGVS(ph)DLSAAK_3	P53981	>sp|P53981|YNB0_YEAST Uncharacterized phosphatase YNL010W OS=Saccharomyces cerevisiae (strain ATCC 204508 / S288c) GN=YNL010W PE=1 SV=1	25682	80026	130480	257190	0.705915	0.507023	0.606469	0.0799687
_FNS(ph)SIGR_2	P05740;P46990	>sp|P05740|RL17A_YEAST 60S ribosomal protein L17-A OS=Saccharomyces cerevisiae (strain ATCC 204508 / S288c) GN=RPL17A PE=1 SV=4;>sp|P46990|RL17B_YEAST 60S ribosomal protein L17-B OS=Saccharomyces cerevisiae (strain ATCC 204508 / S288c) GN=RPL17B PE=1 SV=2	6877400	8840600	16688000	59200000	0.38498	0.82584	0.60541	0.188757
_(ac)S(ph)FSQLEQNIK_2	P24583	>sp|P24583|KPC1_YEAST Protein kinase C-like 1 OS=Saccharomyces cerevisiae (strain ATCC 204508 / S288c) GN=PKC1 PE=1 SV=3	84709	112140	270570	570430	0.50435	0.706442	0.605396	0.12736
_KYS(ph)ELEK_2	Q00402	>sp|Q00402|NUM1_YEAST Nuclear migration protein NUM1 OS=Saccharomyces cerevisiae (strain ATCC 204508 / S288c) GN=NUM1 PE=1 SV=2	78396	201540	259250	989590	0.519425	0.691094	0.605259	0.178193
_AS(ph)GLVGNQLR_2	Q06706	>sp|Q06706|ELP1_YEAST Elongator complex protein 1 OS=Saccharomyces cerevisiae (strain ATCC 204508 / S288c) GN=IKI3 PE=1 SV=1	17506	87765	75058	331240	0.63221	0.576821	0.604516	0.176115
_AQALRDS(ph)SMSSYMSSK_3	P15108;P02829	>sp|P15108|HSC82_YEAST ATP-dependent molecular chaperone HSC82 OS=Saccharomyces cerevisiae (strain ATCC 204508 / S288c) GN=HSC82 PE=1 SV=4;>sp|P02829|HSP82_YEAST ATP-dependent molecular chaperone HSP82 OS=Saccharomyces cerevisiae (strain ATCC 204508 / S288	320290	564750	1831000	1597800	0.757145	0.451666	0.604406	0.0590833
_NADGLSGTT(ph)TIIENNVGVNEEK_3	P53885	>sp|P53885|MDG1_YEAST Signal transduction protein MDG1 OS=Saccharomyces cerevisiae (strain ATCC 204508 / S288c) GN=MDG1 PE=1 SV=1	36977	2297500	704410	1934900	1.27989	-0.074597	0.602648	0.408412
_SQS(ph)S(ph)IADNNGSPVK_2	P47035	>sp|P47035|NET1_YEAST Nucleolar protein NET1 OS=Saccharomyces cerevisiae (strain ATCC 204508 / S288c) GN=NET1 PE=1 SV=1	87437	303860	300360	1416900	0.535947	0.668666	0.602306	0.189835
_STTAGAVPSAATTSTTST(ph)TSNSK_2	P31383	>sp|P31383|2AAA_YEAST Protein phosphatase PP2A regulatory subunit A OS=Saccharomyces cerevisiae (strain ATCC 204508 / S288c) GN=TPD3 PE=1 SV=3	16839	47116	47685	265100	0.452065	0.750241	0.601153	0.205254
_KS(ph)FNSTETKPVFATK_3	P32787	>sp|P32787|MG101_YEAST Mitochondrial genome maintenance protein MGM101 OS=Saccharomyces cerevisiae (strain ATCC 204508 / S288c) GN=MGM101 PE=1 SV=1	154970	413060	570400	1786400	0.565932	0.635966	0.600949	0.156498
_STS(ph)NLASPMSSK_2	Q12271	>sp|Q12271|INP53_YEAST Polyphosphatidylinositol phosphatase INP53 OS=Saccharomyces cerevisiae (strain ATCC 204508 / S288c) GN=INP53 PE=1 SV=1	115450	163040	514980	581150	0.649396	0.551994	0.600695	0.00723201
_DYNKDDRT(ph)PLAK_3	P53836	>sp|P53836|CA120_YEAST CCR4-NOT transcriptional complex subunit CAF120 OS=Saccharomyces cerevisiae (strain ATCC 204508 / S288c) GN=CAF120 PE=1 SV=1	53245	217180	218480	838550	0.613133	0.586709	0.599921	0.167269
_(ac)SQDAAIAEQTPVEHLS(ph)AVDSASHSVLS(ph)TPSNK_3	P39004;P39003	>sp|P39004|HXT7_YEAST High-affinity hexose transporter HXT6 OS=Saccharomyces cerevisiae (strain ATCC 204508 / S288c) GN=HXT7 PE=1 SV=1;>sp|P39003|HXT6_YEAST High-affinity hexose transporter HXT6 OS=Saccharomyces cerevisiae (strain ATCC 204508 / S288c) GN=H	403630	408120	387960	6714100	-0.0171965	1.2162	0.599502	0.250791
_VSGSTAGDSSIASS(ph)SSNLR_2	P38426	>sp|P38426|TPS3_YEAST Trehalose synthase complex regulatory subunit TPS3 OS=Saccharomyces cerevisiae (strain ATCC 204508 / S288c) GN=TPS3 PE=1 SV=3	163130	73944	69954	2720900	-0.367721	1.56581	0.599044	0.2612
_IGGLLKPS(ph)ELDD_2	P30822	>sp|P30822|XPO1_YEAST Exportin-1 OS=Saccharomyces cerevisiae (strain ATCC 204508 / S288c) GN=CRM1 PE=1 SV=1	46966	89200	167100	395580	0.551193	0.646869	0.599031	0.131053
_DPNVTNAINSYYSHASPAAQQSYLQSSHAAAAEVAPVAS(ph)PMATSQR_4	P43621	>sp|P43621|COPD_YEAST Coatomer subunit delta OS=Saccharomyces cerevisiae (strain ATCC 204508 / S288c) GN=RET2 PE=1 SV=3	123920	411630	897970	895520	0.86012	0.337568	0.598844	0.0721602
_M(ox)NS(ph)ATS(ph)QEDLFNETK_2	Q03897	>sp|Q03897|WDR59_YEAST Maintenance of telomere capping protein 5 OS=Saccharomyces cerevisiae (strain ATCC 204508 / S288c) GN=MTC5 PE=1 SV=1	34733	207830	105770	1075800	0.48362	0.714023	0.598822	0.224007
_VAQPDS(ph)LRETNTTDPLGHTK_3	P06700	>sp|P06700|SIR2_YEAST NAD-dependent histone deacetylase SIR2 OS=Saccharomyces cerevisiae (strain ATCC 204508 / S288c) GN=SIR2 PE=1 SV=1	71105	109600	242490	503720	0.532794	0.662379	0.597586	0.119433
_ES(ph)HSNS(ph)SSGIFQNLK_3	P41832	>sp|P41832|BNI1_YEAST Protein BNI1 OS=Saccharomyces cerevisiae (strain ATCC 204508 / S288c) GN=BNI1 PE=1 SV=3	30773	105710	147580	345310	0.680858	0.514093	0.597475	0.105613
_ASNS(ph)SVHS(ph)FSSQGNNNGGGR_3	P24276	>sp|P24276|SSD1_YEAST Protein SSD1 OS=Saccharomyces cerevisiae (strain ATCC 204508 / S288c) GN=SSD1 PE=1 SV=1	45478	157130	183510	608980	0.605858	0.588344	0.597101	0.155628
_YGVYQS(ph)PAQSYSIGVSDAHAASDK_3	Q05050	>sp|Q05050|EIS1_YEAST Eisosome protein 1 OS=Saccharomyces cerevisiae (strain ATCC 204508 / S288c) GN=EIS1 PE=1 SV=1	55125	149550	194370	662170	0.547281	0.646183	0.596732	0.165573
_GVERPS(ph)TPFS(ph)DYR_3	P32578	>sp|P32578|SIP1_YEAST SNF1 protein kinase subunit beta-1 OS=Saccharomyces cerevisiae (strain ATCC 204508 / S288c) GN=SIP1 PE=1 SV=2	34276	116510	161100	386950	0.672105	0.521292	0.596699	0.11042
_S(ph)LSGIS(ph)SSDLTESGALLHDR_2	P53289	>sp|P53289|RTS3_YEAST Protein phosphatase type 2A regulatory subunit RTS3 OS=Saccharomyces cerevisiae (strain ATCC 204508 / S288c) GN=RTS3 PE=1 SV=1	125600	105360	342520	601250	0.435696	0.756379	0.596038	0.118743
_ADQENS(ph)PLHTVGFDAR_3	Q01519	>sp|Q01519|COX12_YEAST Cytochrome c oxidase subunit 6B OS=Saccharomyces cerevisiae (strain ATCC 204508 / S288c) GN=COX12 PE=1 SV=2	71208	244200	297490	908800	0.620944	0.570723	0.595833	0.145541
_T(ph)S(ph)S(ph)QLSFPNIPEDEPQR_3	Q05518	>sp|Q05518|PAL1_YEAST Protein PAL1 OS=Saccharomyces cerevisiae (strain ATCC 204508 / S288c) GN=PAL1 PE=1 SV=1	51254	98250	495790	157630	0.98557	0.205306	0.595438	0.207731
_GS(ph)GSEDSFVK_2	P01097	>sp|P01097|ATIF_YEAST ATPase inhibitor, mitochondrial OS=Saccharomyces cerevisiae (strain ATCC 204508 / S288c) GN=INH1 PE=1 SV=2	55354	154610	153310	866170	0.442421	0.748366	0.595394	0.206454
_S(ph)SAAPPPPPR_2	P15891	>sp|P15891|ABP1_YEAST Actin-binding protein OS=Saccharomyces cerevisiae (strain ATCC 204508 / S288c) GN=ABP1 PE=1 SV=4	177210	835180	736410	3112600	0.618631	0.571343	0.594987	0.173358
_LS(ph)LTDS(ph)TETIENNATVK_2	Q03497	>sp|Q03497|STE20_YEAST Serine/threonine-protein kinase STE20 OS=Saccharomyces cerevisiae (strain ATCC 204508 / S288c) GN=STE20 PE=1 SV=1	441430	204560	888530	1572900	0.30381	0.88588	0.594845	0.149474
_AS(ph)FPVVDSK_2	P38850	>sp|P38850|RT107_YEAST Regulator of Ty1 transposition protein 107 OS=Saccharomyces cerevisiae (strain ATCC 204508 / S288c) GN=RTT107 PE=1 SV=1	87080	130200	218250	803340	0.399036	0.790288	0.594662	0.188741
_VNSINVKT(ph)PVGVS(ph)PK_3	Q04749	>sp|Q04749|AVO2_YEAST Target of rapamycin complex 2 subunit AVO2 OS=Saccharomyces cerevisiae (strain ATCC 204508 / S288c) GN=AVO2 PE=1 SV=1	66112	182310	301050	618420	0.658358	0.530473	0.594416	0.0927116
_(ac)SQQNILAASVS(ph)ALSLDESTVHTGGAS(ph)SK_3	P38810	>sp|P38810|SFB3_YEAST SED5-binding protein 3 OS=Saccharomyces cerevisiae (strain ATCC 204508 / S288c) GN=SFB3 PE=1 SV=1	111800	166400	572990	501420	0.709705	0.479048	0.594377	0.0500245
_ALKS(ph)QQILEK_2	P48415	>sp|P48415|SEC16_YEAST COPII coat assembly protein SEC16 OS=Saccharomyces cerevisiae (strain ATCC 204508 / S288c) GN=SEC16 PE=1 SV=2	51112	118230	119120	782940	0.367462	0.821001	0.594231	0.217546
_DS(ph)FITTR_2	P39935	>sp|P39935|IF4F1_YEAST Eukaryotic initiation factor 4F subunit p150 OS=Saccharomyces cerevisiae (strain ATCC 204508 / S288c) GN=TIF4631 PE=1 SV=2	29063	192000	136750	629660	0.672587	0.515805	0.594196	0.173205
_KRT(ph)LT(ph)PAPPR_3	Q99271	>sp|Q99271|NAH1_YEAST Na(+)/H(+) antiporter OS=Saccharomyces cerevisiae (strain ATCC 204508 / S288c) GN=NHA1 PE=1 SV=1	134120	428050	511480	1731400	0.581335	0.606903	0.594119	0.160292
_YS(ph)ETSEADKDVNK_2	P53261	>sp|P53261|PESC_YEAST Pescadillo homolog OS=Saccharomyces cerevisiae (strain ATCC 204508 / S288c) GN=NOP7 PE=1 SV=1	33472	161320	85952	966540	0.409574	0.777532	0.593553	0.229284
_KVVVPVLADS(ph)FEQEASR_3	P47047	>sp|P47047|MTR4_YEAST ATP-dependent RNA helicase DOB1 OS=Saccharomyces cerevisiae (strain ATCC 204508 / S288c) GN=MTR4 PE=1 SV=1	64976	160780	252170	636330	0.58894	0.59745	0.593195	0.130631
_(ac)SQDAAIAEQTPVEHLS(ph)AVDS(ph)ASHSVLSTPS(ph)NKAERDEIK_4	P39004;P39003	>sp|P39004|HXT7_YEAST High-affinity hexose transporter HXT6 OS=Saccharomyces cerevisiae (strain ATCC 204508 / S288c) GN=HXT7 PE=1 SV=1;>sp|P39003|HXT6_YEAST High-affinity hexose transporter HXT6 OS=Saccharomyces cerevisiae (strain ATCC 204508 / S288c) GN=H	886850	7249100	980990	100290000	0.0438144	1.14097	0.592394	0.249678
_DAM(ox)MS(ph)APGS(ph)RSNS(ph)R_2	P06634	>sp|P06634|DED1_YEAST ATP-dependent RNA helicase DED1 OS=Saccharomyces cerevisiae (strain ATCC 204508 / S288c) GN=DED1 PE=1 SV=2	25564	97435	84664	449650	0.52007	0.66416	0.592115	0.197082
_GES(ph)YQSAEQEIDHTAPEK_2	Q06146	>sp|Q06146|YL257_YEAST Uncharacterized protein YLR257W OS=Saccharomyces cerevisiae (strain ATCC 204508 / S288c) GN=YLR257W PE=1 SV=1	898560	4838000	4110800	16125000	0.660379	0.522834	0.591607	0.161744
_TAQLS(ph)LQDYLNQQANNQFNK_3	P39015	>sp|P39015|STM1_YEAST Suppressor protein STM1 OS=Saccharomyces cerevisiae (strain ATCC 204508 / S288c) GN=STM1 PE=1 SV=3	145920	460100	649510	1568600	0.648471	0.53266	0.590565	0.114265
_DNETPS(ph)KKT(ph)SPK_3	P20676	>sp|P20676|NUP1_YEAST Nucleoporin NUP1 OS=Saccharomyces cerevisiae (strain ATCC 204508 / S288c) GN=NUP1 PE=1 SV=1	119340	471800	473580	1802900	0.598607	0.582214	0.590411	0.167208
_(ac)SQDAAIAEQTPVEHLSAVDSASHS(ph)VLS(ph)T(ph)PSNKAER_3	P39004;P39003	>sp|P39004|HXT7_YEAST High-affinity hexose transporter HXT6 OS=Saccharomyces cerevisiae (strain ATCC 204508 / S288c) GN=HXT7 PE=1 SV=1;>sp|P39003|HXT6_YEAST High-affinity hexose transporter HXT6 OS=Saccharomyces cerevisiae (strain ATCC 204508 / S288c) GN=H	666810	3897500	3758100	10468000	0.750966	0.429078	0.590022	0.110022
_RMS(ph)S(ph)SSGGDSISR_3	Q9P305	>sp|Q9P305|IGO2_YEAST mRNA stability protein IGO2 OS=Saccharomyces cerevisiae (strain ATCC 204508 / S288c) GN=IGO2 PE=1 SV=3	67571	86123	221280	397920	0.515182	0.664677	0.589929	0.10421
_HIDASGS(ph)INR_2	P07280;P07281	>sp|P07280|RS19A_YEAST 40S ribosomal protein S19-A OS=Saccharomyces cerevisiae (strain ATCC 204508 / S288c) GN=RPS19A PE=1 SV=2;>sp|P07281|RS19B_YEAST 40S ribosomal protein S19-B OS=Saccharomyces cerevisiae (strain ATCC 204508 / S288c) GN=RPS19B PE=1 SV=2	54772	161480	221580	603590	0.606972	0.572623	0.589798	0.135158
_YLLPNKS(ph)NDNVR_3	Q04749	>sp|Q04749|AVO2_YEAST Target of rapamycin complex 2 subunit AVO2 OS=Saccharomyces cerevisiae (strain ATCC 204508 / S288c) GN=AVO2 PE=1 SV=1	202780	670770	765560	2681400	0.576954	0.601788	0.589371	0.163127
_QQVSS(ph)LNNPK_2	Q03177	>sp|Q03177|YMZ2_YEAST WD repeat-containing protein YMR102C OS=Saccharomyces cerevisiae (strain ATCC 204508 / S288c) GN=YMR102C PE=1 SV=1	21445	58780	223030	85165	1.01704	0.161032	0.589034	0.208573
_RSNS(ph)ANVSSPESEK_3	P53125	>sp|P53125|ITC1_YEAST Imitation switch two complex protein 1 OS=Saccharomyces cerevisiae (strain ATCC 204508 / S288c) GN=ITC1 PE=1 SV=1	28803	84172	103700	351730	0.556341	0.621042	0.588691	0.16312
_KKS(ph)SISNTSDHDGANR_3	Q03559	>sp|Q03559|YM8V_YEAST Uncharacterized protein YMR295C OS=Saccharomyces cerevisiae (strain ATCC 204508 / S288c) GN=YMR295C PE=1 SV=1	1207400	1232900	4960600	4511400	0.613683	0.563383	0.588533	0.0214561
_EYT(ph)FPGEER_2	P47122	>sp|P47122|NPA3_YEAST GTPase NPA3 OS=Saccharomyces cerevisiae (strain ATCC 204508 / S288c) GN=NPA3 PE=1 SV=1	52028	302110	244070	967540	0.671277	0.505504	0.588391	0.160566
_ANS(ph)ST(ph)TTLDAIKPNSK_2	P38809	>sp|P38809|YHP7_YEAST Uncharacterized protein YHR097C OS=Saccharomyces cerevisiae (strain ATCC 204508 / S288c) GN=YHR097C PE=1 SV=1	121560	194530	571750	621070	0.672415	0.504154	0.588285	0.0085844
_GYSNTDSNS(ph)DRDVIPGSFR_3	Q07653	>sp|Q07653|HBT1_YEAST Protein HBT1 OS=Saccharomyces cerevisiae (strain ATCC 204508 / S288c) GN=HBT1 PE=1 SV=1	1237000	35787	470330	1411500	-0.419967	1.59596	0.587994	0.411836
_IITSNVSSPS(ph)ISPVHS(ph)PVLQAAPK_3	P38970	>sp|P38970|HAL5_YEAST Serine/threonine-protein kinase HAL5 OS=Saccharomyces cerevisiae (strain ATCC 204508 / S288c) GN=HAL5 PE=1 SV=2	58403	860220	1723000	436870	1.46985	-0.294257	0.587796	0.329274
_TNS(ph)GCSIT(ph)SGASMIATK_2	P40052	>sp|P40052|YEQ9_YEAST Uncharacterized protein YER079W OS=Saccharomyces cerevisiae (strain ATCC 204508 / S288c) GN=YER079W PE=1 SV=1	25568	122570	136100	344860	0.726161	0.449259	0.58771	0.103119
_GES(ph)QNSIITR_2	Q05541	>sp|Q05541|NSE3_YEAST Non-structural maintenance of chromosome element 3 OS=Saccharomyces cerevisiae (strain ATCC 204508 / S288c) GN=NSE3 PE=1 SV=1	102060	305600	389340	1196500	0.581473	0.592759	0.587116	0.150709
_S(ph)VNHSSSTLQTDDISVDK_3	P32521	>sp|P32521|PAN1_YEAST Actin cytoskeleton-regulatory complex protein PAN1 OS=Saccharomyces cerevisiae (strain ATCC 204508 / S288c) GN=PAN1 PE=1 SV=2	659540	1257100	2271100	5451100	0.536995	0.637114	0.587055	0.133225
_RIDS(ph)EEISLS(ph)QDVER_2	P38850	>sp|P38850|RT107_YEAST Regulator of Ty1 transposition protein 107 OS=Saccharomyces cerevisiae (strain ATCC 204508 / S288c) GN=RTT107 PE=1 SV=1	81053	230930	422130	657380	0.716677	0.454336	0.585507	0.0352611
_SYS(ph)VGYQAR_2	P20485	>sp|P20485|KICH_YEAST Choline kinase OS=Saccharomyces cerevisiae (strain ATCC 204508 / S288c) GN=CKI1 PE=1 SV=1	320340	1250100	1211300	4885900	0.577641	0.592	0.58482	0.173505
_NVS(ph)FSS(ph)LNSLMFSK_2	P48361	>sp|P48361|ASK10_YEAST Activator of SKN7 protein 10 OS=Saccharomyces cerevisiae (strain ATCC 204508 / S288c) GN=ASK10 PE=1 SV=2	74349	260470	557530	513130	0.874993	0.29447	0.584731	0.0966361
_DS(ph)QSFLDDTVK_2	P40467	>sp|P40467|ASG1_YEAST Activator of stress genes 1 OS=Saccharomyces cerevisiae (strain ATCC 204508 / S288c) GN=ASG1 PE=1 SV=1	16039	60489	65619	217220	0.611852	0.555223	0.583538	0.152477
_HFIQGGS(ph)FGNR_3	P05737;Q12213	>sp|P05737|RL7A_YEAST 60S ribosomal protein L7-A OS=Saccharomyces cerevisiae (strain ATCC 204508 / S288c) GN=RPL7A PE=1 SV=3;>sp|Q12213|RL7B_YEAST 60S ribosomal protein L7-B OS=Saccharomyces cerevisiae (strain ATCC 204508 / S288c) GN=RPL7B PE=1 SV=3	113720	349710	527650	1106700	0.666509	0.500322	0.583415	0.0907206
_T(ph)T(ph)SNTSVTSSATSIGAANTK_2	P40529	>sp|P40529|AGE2_YEAST ADP-ribosylation factor GTPase-activating protein effector protein 2 OS=Saccharomyces cerevisiae (strain ATCC 204508 / S288c) GN=AGE2 PE=1 SV=1	125400	368370	520950	1300700	0.618499	0.547893	0.583196	0.12228
_NPS(ph)FYMFTPENLIK_2	P38295	>sp|P38295|MCFS2_YEAST Medium-chain fatty acid ethyl ester synthase/esterase 2 OS=Saccharomyces cerevisiae (strain ATCC 204508 / S288c) GN=EHT1 PE=1 SV=1	43061	239170	340560	442100	0.89811	0.266814	0.582462	0.0594518
_LLNS(ph)QQK_2	Q02772	>sp|Q02772|PT191_YEAST Mitochondrial protein PET191 OS=Saccharomyces cerevisiae (strain ATCC 204508 / S288c) GN=PET191 PE=1 SV=1	28662	318650	145090	919100	0.704331	0.460049	0.58219	0.189036
_AST(ph)AVES(ph)LDNHPPK_3	P25297	>sp|P25297|PHO84_YEAST Inorganic phosphate transporter PHO84 OS=Saccharomyces cerevisiae (strain ATCC 204508 / S288c) GN=PHO84 PE=1 SV=2	110020	578950	333140	2788200	0.481155	0.682683	0.581919	0.217961
_YHPDKQS(ph)AAGGSLDQDGFFK_3	P32527	>sp|P32527|ZUO1_YEAST Zuotin OS=Saccharomyces cerevisiae (strain ATCC 204508 / S288c) GN=ZUO1 PE=1 SV=1	19753	195730	145600	386190	0.867528	0.295144	0.581336	0.0641397
_SITS(ph)SLSDVNGK_2	P49687	>sp|P49687|NU145_YEAST Nucleoporin NUP145 OS=Saccharomyces cerevisiae (strain ATCC 204508 / S288c) GN=NUP145 PE=1 SV=1	20550	111280	115060	287350	0.748113	0.411994	0.580053	0.09319
_LKRPASSGSSS(ph)STS(ph)VNK_3	Q06685	>sp|Q06685|VIP1_YEAST Inositol hexakisphosphate and diphosphoinositol-pentakisphosphate kinase OS=Saccharomyces cerevisiae (strain ATCC 204508 / S288c) GN=VIP1 PE=1 SV=1	116690	408610	435660	1578300	0.572114	0.586881	0.579497	0.165259
_S(ph)PDNKVPK_2	P36517	>sp|P36517|RM04_YEAST 54S ribosomal protein L4, mitochondrial OS=Saccharomyces cerevisiae (strain ATCC 204508 / S288c) GN=MRPL4 PE=1 SV=2	85452	904710	331320	3355300	0.588525	0.569222	0.578874	0.21817
_KISSS(ph)YSPSALK_3	P47025	>sp|P47025|MDV1_YEAST Mitochondrial division protein 1 OS=Saccharomyces cerevisiae (strain ATCC 204508 / S288c) GN=MDV1 PE=1 SV=1	86975	272390	339600	1002200	0.591573	0.565763	0.578668	0.143926
_SPS(ph)NLNS(ph)TSVT(ph)PR_2	Q03640	>sp|Q03640|TCB3_YEAST Tricalbin-3 OS=Saccharomyces cerevisiae (strain ATCC 204508 / S288c) GN=TCB3 PE=1 SV=1	28306	137330	138020	404500	0.688064	0.469153	0.578608	0.125969
_DASAS(ph)S(ph)TSTFDAR_2	P32521	>sp|P32521|PAN1_YEAST Actin cytoskeleton-regulatory complex protein PAN1 OS=Saccharomyces cerevisiae (strain ATCC 204508 / S288c) GN=PAN1 PE=1 SV=2	80750	1110300	570860	2231800	0.849387	0.303215	0.576301	0.118856
_IAS(ph)PIQHEHDSGS(ph)R_2	P38427	>sp|P38427|TSL1_YEAST Trehalose synthase complex regulatory subunit TSL1 OS=Saccharomyces cerevisiae (strain ATCC 204508 / S288c) GN=TSL1 PE=1 SV=1	151690	820250	641660	2751200	0.626348	0.525576	0.575962	0.1709
_RFNS(ph)SIGR_2	P05740;P46990	>sp|P05740|RL17A_YEAST 60S ribosomal protein L17-A OS=Saccharomyces cerevisiae (strain ATCC 204508 / S288c) GN=RPL17A PE=1 SV=4;>sp|P46990|RL17B_YEAST 60S ribosomal protein L17-B OS=Saccharomyces cerevisiae (strain ATCC 204508 / S288c) GN=RPL17B PE=1 SV=2	6751200	11402000	22338000	48673000	0.519663	0.630307	0.574985	0.123918
_SS(ph)S(ph)NSS(ph)VTSTGQSSR_2	Q08422	>sp|Q08422|YO052_YEAST AN1-type zinc finger protein YOR052C OS=Saccharomyces cerevisiae (strain ATCC 204508 / S288c) GN=YOR052C PE=1 SV=1	31330	55975	101010	245150	0.508404	0.641438	0.574921	0.137663
_HAS(ph)VIMDPNGNK_3	Q00816	>sp|Q00816|REG1_YEAST Resistance to glucose repression protein 1 OS=Saccharomyces cerevisiae (strain ATCC 204508 / S288c) GN=REG1 PE=1 SV=1	22564	57034	83382	217520	0.567656	0.581365	0.574511	0.134696
_T(ph)ISTALGNGNNTNTVTTSGLK_2	Q06685	>sp|Q06685|VIP1_YEAST Inositol hexakisphosphate and diphosphoinositol-pentakisphosphate kinase OS=Saccharomyces cerevisiae (strain ATCC 204508 / S288c) GN=VIP1 PE=1 SV=1	71083	425400	361120	1179800	0.705886	0.443011	0.574448	0.133168
_AFTS(ph)YDR_2	P0CX51;P0CX52	>sp|P0CX51|RS16A_YEAST 40S ribosomal protein S16-A OS=Saccharomyces cerevisiae (strain ATCC 204508 / S288c) GN=RPS16A PE=1 SV=1;>sp|P0CX52|RS16B_YEAST 40S ribosomal protein S16-B OS=Saccharomyces cerevisiae (strain ATCC 204508 / S288c) GN=RPS16B PE=1 SV=1	45570	56463	108010	335490	0.374785	0.773916	0.57435	0.179924
_QLLQGQQQPGVQQIS(ph)QQQHQQNEK_3	Q12030	>sp|Q12030|TAF10_YEAST Transcription initiation factor TFIID subunit 10 OS=Saccharomyces cerevisiae (strain ATCC 204508 / S288c) GN=TAF10 PE=1 SV=1	96989	184120	315660	796700	0.512497	0.636194	0.574345	0.140862
_STM(ox)S(ph)DIDK_2	P38041	>sp|P38041|BOB1_YEAST Protein BOB1 OS=Saccharomyces cerevisiae (strain ATCC 204508 / S288c) GN=BOI1 PE=1 SV=1	15169	187030	41054	972140	0.432399	0.715818	0.574108	0.239509
_AVMNAWNGTESQS(ph)K_2	Q12305	>sp|Q12305|RDL1_YEAST Thiosulfate sulfurtransferase RDL1, mitochondrial OS=Saccharomyces cerevisiae (strain ATCC 204508 / S288c) GN=RDL1 PE=1 SV=1	855370	45595	1023000	535270	0.0777216	1.06966	0.573689	0.145014
_APS(ph)SVS(ph)M(ox)VSPPPLHK_2	P38968	>sp|P38968|SEC31_YEAST Protein transport protein SEC31 OS=Saccharomyces cerevisiae (strain ATCC 204508 / S288c) GN=SEC31 PE=1 SV=3	41384	311300	156060	1159000	0.576459	0.570904	0.573682	0.207199
_AHNVSTSNNSPSTDNDSIS(ph)KSTTEPIQLNNK_4	P0CX70;P0CX71;P0CX72;P0CX73;Q03612;P0C2I7;P0C2I5;Q12414;P0C2I3;Q12273;P47098;Q03434;P0C2I6;P0C2J1;Q07793;Q04670;Q92393;Q12316;Q12193	>sp|P0CX70|YD15A_YEAST Transposon Ty1-DR6 Gag polyprotein OS=Saccharomyces cerevisiae (strain ATCC 204508 / S288c) GN=TY1A-DR6 PE=2 SV=1;>sp|P0CX71|YE11A_YEAST Transposon Ty1-ER1 Gag polyprotein OS=Saccharomyces cerevisiae (strain ATCC 204508 / S288c) GN=T	299870	647060	969620	2807300	0.509669	0.637344	0.573506	0.154304
_IQKS(ph)VYDVLR_2	P34167	>sp|P34167|IF4B_YEAST Eukaryotic translation initiation factor 4B OS=Saccharomyces cerevisiae (strain ATCC 204508 / S288c) GN=TIF3 PE=1 SV=1	197710	1317400	1242100	2940000	0.798128	0.34863	0.573379	0.0679586
_IRDSDSVLPNANTADHNNTNS(ph)GGEPINSSVAS(ph)NDIIEEK_4	P36027	>sp|P36027|MID2_YEAST Cell wall integrity sensor MID2 OS=Saccharomyces cerevisiae (strain ATCC 204508 / S288c) GN=MID2 PE=1 SV=1	234670	1716500	1523100	3703400	0.812271	0.333957	0.573114	0.0668784
_(ac)M(ox)ESQQLS(ph)QHS(ph)PISHGSACASVTSK_3	P0CX70;P0CX71;P0CX72;P0CX73;Q03964;Q03612;P0C2I5;Q12414;P0C2I3;Q07793;Q04214;Q04215	>sp|P0CX70|YD15A_YEAST Transposon Ty1-DR6 Gag polyprotein OS=Saccharomyces cerevisiae (strain ATCC 204508 / S288c) GN=TY1A-DR6 PE=2 SV=1;>sp|P0CX71|YE11A_YEAST Transposon Ty1-ER1 Gag polyprotein OS=Saccharomyces cerevisiae (strain ATCC 204508 / S288c) GN=T	51988	870310	228910	2760900	0.643762	0.501377	0.572569	0.220299
_(ac)S(ph)LSSKLSVQDLDLK_2	P00560	>sp|P00560|PGK_YEAST Phosphoglycerate kinase OS=Saccharomyces cerevisiae (strain ATCC 204508 / S288c) GN=PGK1 PE=1 SV=2	397270	386330	1428500	1487900	0.555794	0.585615	0.570705	0.0104941
_(ac)S(ph)REGFQIPTNLDAAAAGTSQAR_3	P40422	>sp|P40422|RPAB4_YEAST DNA-directed RNA polymerases I, II, and III subunit RPABC4 OS=Saccharomyces cerevisiae (strain ATCC 204508 / S288c) GN=RPC10 PE=1 SV=1	913300	1069700	2609700	5178800	0.455977	0.684967	0.570472	0.125373
_SET(ph)LSESDISVNTNK_2	Q12132	>sp|Q12132|USV1_YEAST Nutrient and stress factor 1 OS=Saccharomyces cerevisiae (strain ATCC 204508 / S288c) GN=USV1 PE=1 SV=1	47099	300940	208080	940310	0.645219	0.494791	0.570005	0.171488
_SLS(ph)GISSS(ph)DLTESGALLHDR_3	P53289	>sp|P53289|RTS3_YEAST Protein phosphatase type 2A regulatory subunit RTS3 OS=Saccharomyces cerevisiae (strain ATCC 204508 / S288c) GN=RTS3 PE=1 SV=1	215250	524740	943370	1652600	0.641739	0.498224	0.569981	0.0675259
_KSSFGSDGNT(ph)AYST(ph)PLNSPGLSK_3	P26570	>sp|P26570|PPZ1_YEAST Serine/threonine-protein phosphatase PP-Z1 OS=Saccharomyces cerevisiae (strain ATCC 204508 / S288c) GN=PPZ1 PE=1 SV=5	22536	254310	123440	639810	0.738579	0.400688	0.569633	0.168511
_TDS(ph)IIDR_2	P35201	>sp|P35201|MIF2_YEAST Protein MIF2 OS=Saccharomyces cerevisiae (strain ATCC 204508 / S288c) GN=MIF2 PE=1 SV=1	27192	105490	126630	311790	0.668095	0.470651	0.569373	0.107031
_AS(ph)FSTNR_2	P39960	>sp|P39960|BEM2_YEAST GTPase-activating protein BEM2/IPL2 OS=Saccharomyces cerevisiae (strain ATCC 204508 / S288c) GN=BEM2 PE=1 SV=1	501160	879670	1501300	4027900	0.476491	0.660759	0.568625	0.152088
_(ac)SQDAAIAEQTPVEHLSAVDSASHSVLST(ph)PSNK_3	P39004;P39003	>sp|P39004|HXT7_YEAST High-affinity hexose transporter HXT6 OS=Saccharomyces cerevisiae (strain ATCC 204508 / S288c) GN=HXT7 PE=1 SV=1;>sp|P39003|HXT6_YEAST High-affinity hexose transporter HXT6 OS=Saccharomyces cerevisiae (strain ATCC 204508 / S288c) GN=H	455630	22969000	5230500	27407000	1.05993	0.0767194	0.568325	0.0116339
_CELLSDGPTLS(ph)SSSTLSLPK_2	P31374	>sp|P31374|PSK1_YEAST Serine/threonine-protein kinase PSK1 OS=Saccharomyces cerevisiae (strain ATCC 204508 / S288c) GN=PSK1 PE=1 SV=2	23730	67958	173030	127600	0.862824	0.27361	0.568217	0.129024
_IIEALSS(ph)GVENLK_2	P40160	>sp|P40160|RIO2_YEAST Serine/threonine-protein kinase RIO2 OS=Saccharomyces cerevisiae (strain ATCC 204508 / S288c) GN=RIO2 PE=1 SV=1	77310	155400	239870	685040	0.49174	0.644265	0.568003	0.155208
_NNS(ph)YS(ph)NSLVK_2	P32488	>sp|P32488|ISF1_YEAST Increasing suppression factor 1 OS=Saccharomyces cerevisiae (strain ATCC 204508 / S288c) GN=ISF1 PE=1 SV=1	79361	133900	177410	818960	0.349371	0.786482	0.567927	0.204749
_IFSLDDIS(ph)SFNSSR_2	P18963	>sp|P18963|IRA1_YEAST Inhibitory regulator protein IRA1 OS=Saccharomyces cerevisiae (strain ATCC 204508 / S288c) GN=IRA1 PE=1 SV=2	36918	104830	146930	359700	0.599872	0.535455	0.567664	0.120295
_TKESLNS(ph)PLLTK_3	P38345	>sp|P38345|FMP21_YEAST Protein FMP21, mitochondrial OS=Saccharomyces cerevisiae (strain ATCC 204508 / S288c) GN=FMP21 PE=1 SV=2	119500	155420	316550	801070	0.423074	0.712164	0.567619	0.155711
_RSS(ph)S(ph)TGTGSAM(ox)SGGLATR_2	P40013	>sp|P40013|BIM1_YEAST Protein BIM1 OS=Saccharomyces cerevisiae (strain ATCC 204508 / S288c) GN=BIM1 PE=1 SV=1	32834	202010	74987	1206800	0.358662	0.776262	0.567462	0.236654
_LSLASS(ph)FSN_2	P32488	>sp|P32488|ISF1_YEAST Increasing suppression factor 1 OS=Saccharomyces cerevisiae (strain ATCC 204508 / S288c) GN=ISF1 PE=1 SV=1	26109	94980	115630	291900	0.64628	0.487602	0.566941	0.114184
_QFLPIS(ph)LDQQIHT(ph)VSLQGVS(ph)S(ph)S(ph)FS(ph)R_3	P53207	>sp|P53207|SNU71_YEAST U1 small nuclear ribonucleoprotein component SNU71 OS=Saccharomyces cerevisiae (strain ATCC 204508 / S288c) GN=SNU71 PE=1 SV=1	124650	72203	344620	355280	0.441648	0.692016	0.566832	0.0397243
_VNRLS(ph)VLSAITSTQQK_3	P12385	>sp|P12385|ERF1_YEAST Eukaryotic peptide chain release factor subunit 1 OS=Saccharomyces cerevisiae (strain ATCC 204508 / S288c) GN=SUP45 PE=1 SV=2	76262	25993	94865	284040	0.0947978	1.03852	0.56666	0.227092
_S(ph)SAIAIPTHLYGLEK_3	P23493	>sp|P23493|MBR1_YEAST Mitochondrial biogenesis regulation protein 1 OS=Saccharomyces cerevisiae (strain ATCC 204508 / S288c) GN=MBR1 PE=1 SV=2	158850	1103900	945030	2518400	0.774458	0.358195	0.566327	0.0885259
_ENEDSLQTQVTEENFS(ph)K_2	P40340	>sp|P40340|TBP7_YEAST Tat-binding homolog 7 OS=Saccharomyces cerevisiae (strain ATCC 204508 / S288c) GN=YTA7 PE=1 SV=2	52331	70894	123480	407570	0.372838	0.759593	0.566215	0.183708
_RSS(ph)S(ph)TGTGSAM(ox)SGGLATR_3	P40013	>sp|P40013|BIM1_YEAST Protein BIM1 OS=Saccharomyces cerevisiae (strain ATCC 204508 / S288c) GN=BIM1 PE=1 SV=1	65029	331860	132940	2201000	0.310549	0.821665	0.566107	0.23844
_DSTT(ph)GGSSVM(ox)IDGVK_2	P00812	>sp|P00812|ARGI_YEAST Arginase OS=Saccharomyces cerevisiae (strain ATCC 204508 / S288c) GN=CAR1 PE=1 SV=1	21410	160070	58861	789050	0.439211	0.692795	0.566003	0.231069
_SLDS(ph)AIR_2	Q12265	>sp|Q12265|KPR5_YEAST Ribose-phosphate pyrophosphokinase 5 OS=Saccharomyces cerevisiae (strain ATCC 204508 / S288c) GN=PRS5 PE=1 SV=1	37606	147770	185590	405280	0.693297	0.438169	0.565733	0.0839733
_RSPS(ph)NLNS(ph)TSVT(ph)PR_2	Q03640	>sp|Q03640|TCB3_YEAST Tricalbin-3 OS=Saccharomyces cerevisiae (strain ATCC 204508 / S288c) GN=TCB3 PE=1 SV=1	107910	350360	451380	1133600	0.621481	0.509945	0.565713	0.118452
_EGT(ph)PKTDS(ph)FIFDGTAK_2	Q12343	>sp|Q12343|MED4_YEAST Mediator of RNA polymerase II transcription subunit 4 OS=Saccharomyces cerevisiae (strain ATCC 204508 / S288c) GN=MED4 PE=1 SV=1	142610	239900	428820	1078700	0.478125	0.65287	0.565498	0.145331
_SDS(ph)LVVEQK_2	P38793	>sp|P38793|TRM5_YEAST tRNA (guanine(37)-N1)-methyltransferase OS=Saccharomyces cerevisiae (strain ATCC 204508 / S288c) GN=TRM5 PE=1 SV=1	72201	99216	164890	586200	0.358651	0.771464	0.565058	0.190131
_QHLS(ph)DITLEER_3	P14164	>sp|P14164|ABF1_YEAST ARS-binding factor 1 OS=Saccharomyces cerevisiae (strain ATCC 204508 / S288c) GN=ABF1 PE=1 SV=4	73126	237460	275750	849110	0.576444	0.553373	0.564909	0.148174
_GS(ph)FDEAANR_2	P38682	>sp|P38682|GLO3_YEAST ADP-ribosylation factor GTPase-activating protein GLO3 OS=Saccharomyces cerevisiae (strain ATCC 204508 / S288c) GN=GLO3 PE=1 SV=1	1444200	8335700	6892900	23545000	0.678775	0.450957	0.564866	0.1405
_FNIY(ph)FSLHT(ph)Y(ph)MY(ph)IHIY(ph)IYICMYTYVYK_4	P36140	>sp|P36140|YK27_YEAST Putative uncharacterized protein YKR047W OS=Saccharomyces cerevisiae (strain ATCC 204508 / S288c) GN=YKR047W PE=5 SV=1	463560	1643500	328870	31221000	-0.149082	1.27868	0.564798	0.25145
_QT(ph)NSSLGGIGDSNAYTTINSK_2	P0C2I7;P0C2I5;Q12414;P0C2I3;P0C2I6;P0C2J1;Q07793;Q04670;Q92393;Q12316;Q12193;Q04214;Q12490	>sp|P0C2I7|YL14B_YEAST Transposon Ty1-LR4 Gag-Pol polyprotein OS=Saccharomyces cerevisiae (strain ATCC 204508 / S288c) GN=TY1B-LR4 PE=5 SV=1;>sp|P0C2I5|YL12B_YEAST Transposon Ty1-LR2 Gag-Pol polyprotein OS=Saccharomyces cerevisiae (strain ATCC 204508 / S28	252650	489680	979830	1700600	0.588631	0.54069	0.564661	0.0778578
_VNT(ph)PAIDDYGNLITVER_2	P48361	>sp|P48361|ASK10_YEAST Activator of SKN7 protein 10 OS=Saccharomyces cerevisiae (strain ATCC 204508 / S288c) GN=ASK10 PE=1 SV=2	100270	1056900	721370	1977400	0.856987	0.272061	0.564524	0.06106
_YLQSYNNNNAPVNQST(ph)ER_2	P34237	>sp|P34237|CASP_YEAST Protein CASP OS=Saccharomyces cerevisiae (strain ATCC 204508 / S288c) GN=COY1 PE=1 SV=2	48822	101330	152790	434770	0.495479	0.632522	0.564	0.153791
_VNT(ph)NESFIR_2	P25355	>sp|P25355|CTR86_YEAST Copper transport protein 86 OS=Saccharomyces cerevisiae (strain ATCC 204508 / S288c) GN=CTR86 PE=1 SV=1	469890	1130200	1590800	4475400	0.529619	0.597677	0.563648	0.147083
_KSS(ph)S(ph)FAHLQAPSPIPDPLQVSKPETR_3	Q12329	>sp|Q12329|HSP42_YEAST Heat shock protein 42 OS=Saccharomyces cerevisiae (strain ATCC 204508 / S288c) GN=HSP42 PE=1 SV=1	1940300	7345400	8316700	22914000	0.632082	0.494085	0.563084	0.126264
_DASAS(ph)LEVK_2	Q12035	>sp|Q12035|FCF2_YEAST rRNA-processing protein FCF2 OS=Saccharomyces cerevisiae (strain ATCC 204508 / S288c) GN=FCF2 PE=1 SV=1	20468	45913	67798	185330	0.520141	0.60601	0.563076	0.145825
_LANS(ph)FEFPITTNNVNAQDR_3	P38313	>sp|P38313|AME1_YEAST Central kinetochore subunit AME1 OS=Saccharomyces cerevisiae (strain ATCC 204508 / S288c) GN=AME1 PE=1 SV=1	75342	187080	270010	697440	0.554343	0.571479	0.562911	0.134008
_ADS(ph)FTKEELTQFR_2	Q07657	>sp|Q07657|SHS1_YEAST Seventh homolog of septin 1 OS=Saccharomyces cerevisiae (strain ATCC 204508 / S288c) GN=SHS1 PE=1 SV=1	340900	585250	1127200	2362000	0.519374	0.605938	0.562656	0.117379
_IIHRS(ph)PS(ph)IDASPPENNSSHNIVPIK_4	Q03612;P0C2I7;P0C2I5;Q12414;P0C2I3;Q12273;P47098;Q03434;P0C2I6;P0C2J1;Q07793;Q04670;Q92393;O13527	>sp|Q03612|YE11B_YEAST Transposon Ty1-ER1 Gag-Pol polyprotein OS=Saccharomyces cerevisiae (strain ATCC 204508 / S288c) GN=TY1B-ER1 PE=3 SV=1;>sp|P0C2I7|YL14B_YEAST Transposon Ty1-LR4 Gag-Pol polyprotein OS=Saccharomyces cerevisiae (strain ATCC 204508 / S28	509510	1102600	1620700	4617600	0.50255	0.621998	0.562274	0.152538
_TVS(ph)SESYQSEQESSTPLLK_2	Q07532	>sp|Q07532|IWR1_YEAST RNA polymerase II nuclear localization protein IWR1 OS=Saccharomyces cerevisiae (strain ATCC 204508 / S288c) GN=IWR1 PE=1 SV=2	151750	347890	612730	1147000	0.60614	0.518121	0.562131	0.0834488
_APQKEES(ph)KESEPMEVDEDDSK_3	P15705	>sp|P15705|STI1_YEAST Heat shock protein STI1 OS=Saccharomyces cerevisiae (strain ATCC 204508 / S288c) GN=STI1 PE=1 SV=1	43776	139590	186140	436950	0.628604	0.495577	0.562091	0.107871
_RVS(ph)NSPSSTDRPPR_3	P50077	>sp|P50077|CCH1_YEAST Calcium-channel protein CCH1 OS=Saccharomyces cerevisiae (strain ATCC 204508 / S288c) GN=CCH1 PE=1 SV=1	23674	1200600	346320	1090500	1.16521	-0.0417727	0.561717	0.354676
_LHSALVS(ph)KESINSK_3	Q04545	>sp|Q04545|TDA9_YEAST Probable transcription factor TDA9 OS=Saccharomyces cerevisiae (strain ATCC 204508 / S288c) GN=TDA9 PE=1 SV=1	133840	334180	419080	1412400	0.495711	0.625977	0.560844	0.167678
_(ac)TTTSTT(ph)SVDGR_2	Q07362	>sp|Q07362|PBP4_YEAST Protein PBP4 OS=Saccharomyces cerevisiae (strain ATCC 204508 / S288c) GN=PBP4 PE=1 SV=1	88584	256100	277440	1081500	0.495814	0.625617	0.560715	0.178401
_SSNS(ph)RPS(ph)S(ph)IRSGSVSR_2	P26570	>sp|P26570|PPZ1_YEAST Serine/threonine-protein phosphatase PP-Z1 OS=Saccharomyces cerevisiae (strain ATCC 204508 / S288c) GN=PPZ1 PE=1 SV=5	41904	116240	175710	366330	0.622541	0.498517	0.560529	0.0936212
_TYS(ph)AENVPLTSTVSNDK_2	Q06108	>sp|Q06108|RGC1_YEAST Regulator of the glycerol channel 1 OS=Saccharomyces cerevisiae (strain ATCC 204508 / S288c) GN=RGC1 PE=1 SV=1	378470	1247500	1380600	4517400	0.562036	0.558848	0.560442	0.15534
_S(ph)SSPSSS(ph)FTVSSNER_2	P38954	>sp|P38954|IPT1_YEAST Inositolphosphotransferase 1 OS=Saccharomyces cerevisiae (strain ATCC 204508 / S288c) GN=IPT1 PE=1 SV=2	43340	99864	168560	337220	0.589866	0.528504	0.559185	0.0954754
_TLKPTFS(ph)FTEPAQK_3	P20676	>sp|P20676|NUP1_YEAST Nucleoporin NUP1 OS=Saccharomyces cerevisiae (strain ATCC 204508 / S288c) GN=NUP1 PE=1 SV=1	451410	2229800	2292500	5752600	0.705738	0.411598	0.558668	0.0967082
_TKS(ph)LPNTIK_2	P27895	>sp|P27895|CIN8_YEAST Kinesin-like protein CIN8 OS=Saccharomyces cerevisiae (strain ATCC 204508 / S288c) GN=CIN8 PE=1 SV=3	93071	413840	431120	1166800	0.665784	0.450164	0.557974	0.115677
_TKESLNS(ph)PLLTK_2	P38345	>sp|P38345|FMP21_YEAST Protein FMP21, mitochondrial OS=Saccharomyces cerevisiae (strain ATCC 204508 / S288c) GN=FMP21 PE=1 SV=2	116810	141070	243030	885510	0.31818	0.797759	0.557969	0.196539
_SYTS(ph)DLKDSPSGDNSNVTK_2	P25558	>sp|P25558|BUD3_YEAST Bud site selection protein 3 OS=Saccharomyces cerevisiae (strain ATCC 204508 / S288c) GN=BUD3 PE=1 SV=2	163340	46507	186430	532100	0.0574232	1.05847	0.557949	0.234876
_T(ph)KSNTIPVTSIPSTNK_3	P19659	>sp|P19659|MED15_YEAST Mediator of RNA polymerase II transcription subunit 15 OS=Saccharomyces cerevisiae (strain ATCC 204508 / S288c) GN=GAL11 PE=1 SV=3	45621	161420	160300	599510	0.545769	0.569839	0.557804	0.168505
_NVLNKNS(ph)VGS(ph)VSEVGPDSTQEETPR_3	Q05027	>sp|Q05027|TAF9_YEAST Transcription initiation factor TFIID subunit 9 OS=Saccharomyces cerevisiae (strain ATCC 204508 / S288c) GN=TAF9 PE=1 SV=1	137290	235080	374510	1124300	0.435825	0.679667	0.557746	0.167016
_(ac)S(ph)KEDFVIKPEAAGASTDTSEWPLLLK_3	P33322	>sp|P33322|CBF5_YEAST H/ACA ribonucleoprotein complex subunit 4 OS=Saccharomyces cerevisiae (strain ATCC 204508 / S288c) GN=CBF5 PE=1 SV=1	469010	808090	2521000	1956800	0.730391	0.384087	0.557239	0.0875543
_TKS(ph)ENSKDNISSK_3	P09959	>sp|P09959|SWI6_YEAST Regulatory protein SWI6 OS=Saccharomyces cerevisiae (strain ATCC 204508 / S288c) GN=SWI6 PE=1 SV=1	297620	465010	655130	2748800	0.342665	0.771681	0.557173	0.200572
_NST(ph)PLSS(ph)HLASPVILNK_3	P32873	>sp|P32873|BEM3_YEAST GTPase-activating protein BEM3 OS=Saccharomyces cerevisiae (strain ATCC 204508 / S288c) GN=BEM3 PE=1 SV=3	34839	48334	76220	286830	0.340003	0.773372	0.556688	0.195315
_S(ph)SAIAIPTHLYGLEK_2	P23493	>sp|P23493|MBR1_YEAST Mitochondrial biogenesis regulation protein 1 OS=Saccharomyces cerevisiae (strain ATCC 204508 / S288c) GN=MBR1 PE=1 SV=2	91522	606850	530800	1356300	0.763405	0.349274	0.55634	0.0812444
_S(ph)FLTNNSK_2	Q06604	>sp|Q06604|BSP1_YEAST Protein BSP1 OS=Saccharomyces cerevisiae (strain ATCC 204508 / S288c) GN=BSP1 PE=1 SV=1	58784	284380	248670	868360	0.626364	0.484801	0.555583	0.149931
_KNDS(ph)MSEDYTK_2	P47057	>sp|P47057|SNX4_YEAST Sorting nexin-4 OS=Saccharomyces cerevisiae (strain ATCC 204508 / S288c) GN=SNX4 PE=1 SV=1	26805	52415	90968	199410	0.530673	0.580291	0.555482	0.118994
_(ac)S(ph)AIPENANVTVLNK_2	P38879	>sp|P38879|NACA_YEAST Nascent polypeptide-associated complex subunit alpha OS=Saccharomyces cerevisiae (strain ATCC 204508 / S288c) GN=EGD2 PE=1 SV=3	613930	1235800	2126200	4600000	0.539485	0.57081	0.555147	0.115529
_GLS(ph)VVDTYAILSNK_2	P08524	>sp|P08524|FPPS_YEAST Farnesyl pyrophosphate synthase OS=Saccharomyces cerevisiae (strain ATCC 204508 / S288c) GN=ERG20 PE=1 SV=2	49296	76702	160150	304090	0.511715	0.598195	0.554955	0.105613
_SNS(ph)AHS(ph)ALNAR_3	Q04279	>sp|Q04279|YMX6_YEAST Uncharacterized protein YMR086W OS=Saccharomyces cerevisiae (strain ATCC 204508 / S288c) GN=YMR086W PE=1 SV=1	114160	405320	491250	1212600	0.633789	0.47592	0.554854	0.110901
_QLHHQAVDSPARS(ph)S(ph)MTATTAANSNSNSSR_4	P23291	>sp|P23291|KC11_YEAST Casein kinase I homolog 1 OS=Saccharomyces cerevisiae (strain ATCC 204508 / S288c) GN=YCK1 PE=1 SV=1	40313	250540	419540	309410	1.01733	0.0916573	0.554493	0.200978
_EAS(ph)CKS(ph)TASAAEGK_2	P37262	>sp|P37262|SOL2_YEAST 6-phosphogluconolactonase-like protein 2 OS=Saccharomyces cerevisiae (strain ATCC 204508 / S288c) GN=SOL2 PE=1 SV=2	787870	2694000	1149200	23728000	0.163941	0.944864	0.554402	0.244532
_TTELPAT(ph)SPYVS(ph)PQQSAR_2	P32047	>sp|P32047|MLF3_YEAST Protein MLF3 OS=Saccharomyces cerevisiae (strain ATCC 204508 / S288c) GN=MLF3 PE=1 SV=2	41178	95280	121670	412420	0.470518	0.636338	0.553428	0.170882
_IEESSSTNS(ph)VIEESSEPK_2	Q03323	>sp|Q03323|SDC1_YEAST COMPASS component SDC1 OS=Saccharomyces cerevisiae (strain ATCC 204508 / S288c) GN=SDC1 PE=1 SV=1	112470	277620	412530	960550	0.564419	0.539069	0.551744	0.118226
_AS(ph)FTDEEDEFILDVVR_3	P11938	>sp|P11938|RAP1_YEAST DNA-binding protein RAP1 OS=Saccharomyces cerevisiae (strain ATCC 204508 / S288c) GN=RAP1 PE=1 SV=2	34109	59688	82110	314550	0.381527	0.721803	0.551665	0.190743
_RVS(ph)ILEDK_2	P40693	>sp|P40693|RLP7_YEAST Ribosome biogenesis protein RLP7 OS=Saccharomyces cerevisiae (strain ATCC 204508 / S288c) GN=RLP7 PE=1 SV=1	111990	245260	339740	1024700	0.481967	0.62097	0.551469	0.15951
_ST(ph)SNLSSPSPVVLSNNEQESAR_3	P47166	>sp|P47166|SGM1_YEAST Protein SGM1 OS=Saccharomyces cerevisiae (strain ATCC 204508 / S288c) GN=SGM1 PE=1 SV=1	57758	175350	353460	362390	0.786728	0.31527	0.550999	0.0704748
_SGLS(ph)SSEFDNMNDTSASK_2	Q12443	>sp|Q12443|RTN2_YEAST Reticulon-like protein 2 OS=Saccharomyces cerevisiae (strain ATCC 204508 / S288c) GN=RTN2 PE=1 SV=1	106140	356090	368640	1295900	0.540723	0.561012	0.550868	0.163302
_S(ph)KSLPT(ph)TPGIR_2	P40036	>sp|P40036|GIP2_YEAST GLC7-interacting protein 2 OS=Saccharomyces cerevisiae (strain ATCC 204508 / S288c) GN=GIP2 PE=1 SV=1	229280	463340	601480	2231300	0.418855	0.682658	0.550757	0.183952
_DGFESAVGEEDS(ph)KDATSQENGQSTQQQQPPHHR_4	P25567	>sp|P25567|SRO9_YEAST RNA-binding protein SRO9 OS=Saccharomyces cerevisiae (strain ATCC 204508 / S288c) GN=SRO9 PE=1 SV=2	54209	209050	294150	484930	0.734497	0.365429	0.549963	0.0221419
_NAT(ph)VDS(ph)SINQYK_2	Q05518	>sp|Q05518|PAL1_YEAST Protein PAL1 OS=Saccharomyces cerevisiae (strain ATCC 204508 / S288c) GN=PAL1 PE=1 SV=1	298410	1373900	1372500	3744900	0.662699	0.435485	0.549092	0.114605
_HNLINNISNNSNQS(ph)TIIQQQK_3	P25302	>sp|P25302|SWI4_YEAST Regulatory protein SWI4 OS=Saccharomyces cerevisiae (strain ATCC 204508 / S288c) GN=SWI4 PE=1 SV=2	89130	137650	253400	605070	0.453783	0.643029	0.548406	0.142425
_DSS(ph)TNILIR_2	P47134	>sp|P47134|BIR1_YEAST Protein BIR1 OS=Saccharomyces cerevisiae (strain ATCC 204508 / S288c) GN=BIR1 PE=1 SV=1	23756	47080	71674	194880	0.479588	0.616931	0.54826	0.150205
_AAADALSDLEIKDS(ph)KSNLNK_3	P09938	>sp|P09938|RIR2_YEAST Ribonucleoside-diphosphate reductase small chain 1 OS=Saccharomyces cerevisiae (strain ATCC 204508 / S288c) GN=RNR2 PE=1 SV=2	2239900	3360400	5339400	17601000	0.377264	0.719146	0.548205	0.181783
_TIST(ph)ALGNGNNTNTVTTSGLK_3	Q06685	>sp|Q06685|VIP1_YEAST Inositol hexakisphosphate and diphosphoinositol-pentakisphosphate kinase OS=Saccharomyces cerevisiae (strain ATCC 204508 / S288c) GN=VIP1 PE=1 SV=1	74221	447770	355410	1163000	0.680203	0.414525	0.547364	0.130767
_KVENVS(ph)R_2	P53883	>sp|P53883|NOP13_YEAST Nucleolar protein 13 OS=Saccharomyces cerevisiae (strain ATCC 204508 / S288c) GN=NOP13 PE=1 SV=2	523500	302320	278400	7068300	-0.274247	1.36885	0.5473	0.261526
_AIHASPS(ph)T(ph)KSIHK_3	P34244	>sp|P34244|HSL1_YEAST Probable serine/threonine-protein kinase HSL1 OS=Saccharomyces cerevisiae (strain ATCC 204508 / S288c) GN=HSL1 PE=1 SV=2	193390	337070	929180	871670	0.681666	0.412632	0.547149	0.0499951
_S(ph)KLNDAVEYVSGR_3	P22943	>sp|P22943|HSP12_YEAST 12 kDa heat shock protein OS=Saccharomyces cerevisiae (strain ATCC 204508 / S288c) GN=HSP12 PE=1 SV=1	381650	976810	1215100	3805500	0.502947	0.590602	0.546774	0.158793
_PSPVLLPLKS(ph)NSK_3	Q12515	>sp|Q12515|PAR32_YEAST Protein PAR32 OS=Saccharomyces cerevisiae (strain ATCC 204508 / S288c) GN=PAR32 PE=1 SV=1	20638	184220	114370	412280	0.743645	0.349855	0.54675	0.125875
_LQTDVANSS(ph)SNSK_2	P10964	>sp|P10964|RPA1_YEAST DNA-directed RNA polymerase I subunit RPA190 OS=Saccharomyces cerevisiae (strain ATCC 204508 / S288c) GN=RPA190 PE=1 SV=2	112580	109080	471160	323020	0.621707	0.471484	0.546596	0.0787688
_ANS(ph)NEDGESVSSIQES(ph)PK_2	P34216	>sp|P34216|EDE1_YEAST EH domain-containing and endocytosis protein 1 OS=Saccharomyces cerevisiae (strain ATCC 204508 / S288c) GN=EDE1 PE=1 SV=2	37868	355550	213080	781090	0.75027	0.3418	0.546035	0.125673
_GIFAGDINS(ph)D_1	Q01519	>sp|Q01519|COX12_YEAST Cytochrome c oxidase subunit 6B OS=Saccharomyces cerevisiae (strain ATCC 204508 / S288c) GN=COX12 PE=1 SV=2	93032	184610	272490	777080	0.466718	0.624211	0.545464	0.156381
_YLSS(ph)SSTPVK_2	P29366	>sp|P29366|BEM1_YEAST Bud emergence protein 1 OS=Saccharomyces cerevisiae (strain ATCC 204508 / S288c) GN=BEM1 PE=1 SV=1	116530	246140	484840	727510	0.619161	0.470657	0.544909	0.0421076
_SIS(ph)FVEDSK_2	P32772	>sp|P32772|UGX2_YEAST Protein UGX2 OS=Saccharomyces cerevisiae (strain ATCC 204508 / S288c) GN=UGX2 PE=1 SV=2	43817	103380	137200	405160	0.495711	0.59319	0.544451	0.154477
_KTS(ph)GSSNINDK_2	P53739	>sp|P53739|FPK1_YEAST Flippase kinase 1 OS=Saccharomyces cerevisiae (strain ATCC 204508 / S288c) GN=FPK1 PE=1 SV=1	34861	244050	112240	930110	0.507808	0.581056	0.544432	0.21425
_NSS(ph)LLNER_2	P31374	>sp|P31374|PSK1_YEAST Serine/threonine-protein kinase PSK1 OS=Saccharomyces cerevisiae (strain ATCC 204508 / S288c) GN=PSK1 PE=1 SV=2	232330	259170	576320	1281900	0.394558	0.694269	0.544414	0.146722
_AMNFSGSPGAVST(ph)SPT(ph)QSFMNTLPR_3	P40510	>sp|P40510|SER33_YEAST D-3-phosphoglycerate dehydrogenase 2 OS=Saccharomyces cerevisiae (strain ATCC 204508 / S288c) GN=SER33 PE=1 SV=1	55406	89336	259930	232640	0.6713	0.415658	0.543479	0.0554566
_KS(ph)S(ph)LVSPVLEIPHESK_3	Q08269	>sp|Q08269|ALR1_YEAST Magnesium transporter ALR1 OS=Saccharomyces cerevisiae (strain ATCC 204508 / S288c) GN=ALR1 PE=1 SV=1	32501	97575	129380	299330	0.59997	0.486812	0.543391	0.107503
_VNSINVKT(ph)PVGVS(ph)PK_2	Q04749	>sp|Q04749|AVO2_YEAST Target of rapamycin complex 2 subunit AVO2 OS=Saccharomyces cerevisiae (strain ATCC 204508 / S288c) GN=AVO2 PE=1 SV=1	51987	126730	191980	417720	0.567361	0.518006	0.542684	0.107268
_QKES(ph)EGCITTLK_2	Q12494	>sp|Q12494|KCS1_YEAST Inositol hexakisphosphate kinase 1 OS=Saccharomyces cerevisiae (strain ATCC 204508 / S288c) GN=KCS1 PE=1 SV=1	262890	1273600	837330	4853200	0.503123	0.580995	0.542059	0.199351
_VPIQQQQMGDTS(ph)SR_2	P34909	>sp|P34909|NOT4_YEAST General negative regulator of transcription subunit 4 OS=Saccharomyces cerevisiae (strain ATCC 204508 / S288c) GN=MOT2 PE=1 SV=1	40795	80033	125390	315360	0.487656	0.595538	0.541597	0.140153
_SLDSS(ph)NAS(ph)FNNQGK_2	Q12321	>sp|Q12321|MED1_YEAST Mediator of RNA polymerase II transcription subunit 1 OS=Saccharomyces cerevisiae (strain ATCC 204508 / S288c) GN=MED1 PE=1 SV=1	26945	65036	85821	246940	0.503115	0.579438	0.541277	0.150361
_LQLSSPNSQPMS(ph)PR_2	Q03695	>sp|Q03695|YM58_YEAST Uncharacterized protein YMR206W OS=Saccharomyces cerevisiae (strain ATCC 204508 / S288c) GN=YMR206W PE=4 SV=1	30335	40695	75693	197010	0.397112	0.684947	0.541029	0.160105
_IFS(ph)GVKS(ph)PK_2	Q06315	>sp|Q06315|SKG3_YEAST Protein SKG3 OS=Saccharomyces cerevisiae (strain ATCC 204508 / S288c) GN=SKG3 PE=1 SV=1	103570	225270	339860	827950	0.516066	0.565301	0.540683	0.131064
_AATGGT(ph)PTPK_2	P46678	>sp|P46678|TFC5_YEAST Transcription factor TFIIIB component B OS=Saccharomyces cerevisiae (strain ATCC 204508 / S288c) GN=BDP1 PE=1 SV=1	1105600	4146500	2422900	22727000	0.340737	0.73886	0.539799	0.227471
_RKS(ph)S(ph)TAPDEISTSTK_2	P50942	>sp|P50942|INP52_YEAST Polyphosphatidylinositol phosphatase INP52 OS=Saccharomyces cerevisiae (strain ATCC 204508 / S288c) GN=INP52 PE=1 SV=1	68458	267490	317000	692010	0.665635	0.412805	0.53922	0.0814027
_(ac)S(ph)AGDISAINIK_2	Q05942	>sp|Q05942|RSA3_YEAST Ribosome assembly protein 3 OS=Saccharomyces cerevisiae (strain ATCC 204508 / S288c) GN=RSA3 PE=1 SV=1	154520	285600	514230	1024500	0.522173	0.554754	0.538463	0.105791
_QDS(ph)S(ph)DGENELNGGLGLFNEQGGLQQLIK_3	P40316	>sp|P40316|SECU_YEAST Securin OS=Saccharomyces cerevisiae (strain ATCC 204508 / S288c) GN=PDS1 PE=1 SV=1	87617	139270	198780	730820	0.355784	0.719953	0.537869	0.190873
_TSASENMS(ph)LK_2	Q06685	>sp|Q06685|VIP1_YEAST Inositol hexakisphosphate and diphosphoinositol-pentakisphosphate kinase OS=Saccharomyces cerevisiae (strain ATCC 204508 / S288c) GN=VIP1 PE=1 SV=1	24858	75970	103980	215890	0.621484	0.45359	0.537537	0.0861817
_SSASGGGQS(ph)SSSRSDSGDGS(ph)SK_2	P36775	>sp|P36775|LONM_YEAST Lon protease homolog, mitochondrial OS=Saccharomyces cerevisiae (strain ATCC 204508 / S288c) GN=PIM1 PE=1 SV=2	5303800	97625	2292500	2681300	-0.364278	1.43878	0.537253	0.475719
_VAT(ph)PLS(ph)GGVPPAPLPK_2	P38968	>sp|P38968|SEC31_YEAST Protein transport protein SEC31 OS=Saccharomyces cerevisiae (strain ATCC 204508 / S288c) GN=SEC31 PE=1 SV=3	369160	616860	1230600	2196100	0.522902	0.551466	0.537184	0.0910474
_INAFS(ph)LTDYK_2	Q12098	>sp|Q12098|SLX4_YEAST Structure-specific endonuclease subunit SLX4 OS=Saccharomyces cerevisiae (strain ATCC 204508 / S288c) GN=SLX4 PE=1 SV=1	29019	54620	86496	217340	0.474314	0.599788	0.537051	0.141919
_EDVEDAS(ph)VYR_2	P40032	>sp|P40032|TPA1_YEAST Prolyl 3,4-dihydroxylase TPA1 OS=Saccharomyces cerevisiae (strain ATCC 204508 / S288c) GN=TPA1 PE=1 SV=1	36259	406920	225550	775390	0.793827	0.280011	0.536919	0.0989414
_SMT(ph)DILPLSSKPSK_3	P10862	>sp|P10862|RAD18_YEAST Postreplication repair E3 ubiquitin-protein ligase RAD18 OS=Saccharomyces cerevisiae (strain ATCC 204508 / S288c) GN=RAD18 PE=1 SV=1	32606	131880	203520	249950	0.79531	0.277674	0.536492	0.0575705
_SDTTHS(ph)LKS(ph)SR_3	P33329	>sp|P33329|PPZ2_YEAST Serine/threonine-protein phosphatase PP-Z2 OS=Saccharomyces cerevisiae (strain ATCC 204508 / S288c) GN=PPZ2 PE=1 SV=4	104660	997500	537290	2297200	0.710428	0.362286	0.536357	0.147717
_SVT(ph)PVS(ph)PSIEK_2	P38806	>sp|P38806|YNG2_YEAST Chromatin modification-related protein YNG2 OS=Saccharomyces cerevisiae (strain ATCC 204508 / S288c) GN=YNG2 PE=1 SV=1	34576	71631	103240	283230	0.475073	0.597038	0.536056	0.150121
_TGLSALMS(ph)K_2	P25087	>sp|P25087|ERG6_YEAST Sterol 24-C-methyltransferase OS=Saccharomyces cerevisiae (strain ATCC 204508 / S288c) GN=ERG6 PE=1 SV=4	42455	57362	127810	224740	0.478636	0.593056	0.535846	0.0998918
_S(ph)SDIDQVNNAEDPSR_2	Q06440	>sp|Q06440|CORO_YEAST Coronin-like protein OS=Saccharomyces cerevisiae (strain ATCC 204508 / S288c) GN=CRN1 PE=1 SV=1	120610	471810	446710	1500600	0.568642	0.502498	0.53557	0.152293
_S(ph)ASAALGK_2	P47035	>sp|P47035|NET1_YEAST Nucleolar protein NET1 OS=Saccharomyces cerevisiae (strain ATCC 204508 / S288c) GN=NET1 PE=1 SV=1	17174	139400	92827	303700	0.732803	0.338182	0.535492	0.112644
_FIAS(ph)PNQS(ph)R_2	P32634	>sp|P32634|PMD1_YEAST Negative regulator of sporulation PMD1 OS=Saccharomyces cerevisiae (strain ATCC 204508 / S288c) GN=PMD1 PE=1 SV=1	45023	128930	170490	400290	0.578264	0.492021	0.535143	0.112144
_SCLTS(ph)TSGHTNIFHTSK_3	Q03661	>sp|Q03661|ESC1_YEAST Silent chromatin protein ESC1 OS=Saccharomyces cerevisiae (strain ATCC 204508 / S288c) GN=ESC1 PE=1 SV=1	95471	174570	205890	947170	0.333764	0.734458	0.534111	0.204814
_(ac)S(ph)FDRPEIYSAPVLQGESPNDDDNTEIIK_3	P29496	>sp|P29496|MCM5_YEAST Minichromosome maintenance protein 5 OS=Saccharomyces cerevisiae (strain ATCC 204508 / S288c) GN=MCM5 PE=1 SV=1	345620	860090	1131300	3073000	0.514979	0.553019	0.533999	0.141405
_VSYDASSS(ph)T(ph)STVR_2	P12688	>sp|P12688|YPK1_YEAST Serine/threonine-protein kinase YPK1 OS=Saccharomyces cerevisiae (strain ATCC 204508 / S288c) GN=YPK1 PE=1 SV=2	118920	125170	214900	809180	0.256982	0.810545	0.533763	0.205625
_S(ph)TSNLSSPSPVVLSNNEQESAR_3	P47166	>sp|P47166|SGM1_YEAST Protein SGM1 OS=Saccharomyces cerevisiae (strain ATCC 204508 / S288c) GN=SGM1 PE=1 SV=1	138730	166120	247150	1087700	0.25079	0.816087	0.533439	0.212724
_DAS(ph)SVELTEVPSKPK_2	P38904	>sp|P38904|SPP41_YEAST Protein SPP41 OS=Saccharomyces cerevisiae (strain ATCC 204508 / S288c) GN=SPP41 PE=1 SV=2	55230	581140	315190	1187300	0.756397	0.31028	0.533339	0.12104
_ITS(ph)GMLK_2	P47035	>sp|P47035|NET1_YEAST Nucleolar protein NET1 OS=Saccharomyces cerevisiae (strain ATCC 204508 / S288c) GN=NET1 PE=1 SV=1	88443	221310	352210	647550	0.600138	0.466272	0.533205	0.0736102
_S(ph)GVVKVIPPK_3	P39956	>sp|P39956|RPH1_YEAST DNA damage-responsive transcriptional repressor RPH1 OS=Saccharomyces cerevisiae (strain ATCC 204508 / S288c) GN=RPH1 PE=1 SV=1	21671	113310	86283	331560	0.600046	0.466294	0.53317	0.158382
_AVSSASINS(ph)S(ph)LSGSR_2	P27637	>sp|P27637|BUD14_YEAST Bud site selection protein 14 OS=Saccharomyces cerevisiae (strain ATCC 204508 / S288c) GN=BUD14 PE=1 SV=4	22210	90399	82140	284660	0.568006	0.498163	0.533084	0.154749
_FLNHS(ph)DCS(ph)AINQQQPAHESNLK_3	Q08732	>sp|Q08732|HRK1_YEAST Serine/threonine-protein kinase HRK1 OS=Saccharomyces cerevisiae (strain ATCC 204508 / S288c) GN=HRK1 PE=1 SV=1	132390	433000	558760	1193200	0.62537	0.440225	0.532798	0.0872969
_TAHFENGST(ph)S(ph)SQKK_3	Q03834	>sp|Q03834|MSH6_YEAST DNA mismatch repair protein MSH6 OS=Saccharomyces cerevisiae (strain ATCC 204508 / S288c) GN=MSH6 PE=1 SV=1	187380	2026900	1439700	3068000	0.885549	0.180023	0.532786	0.0292333
_FHS(ph)CLDFINALDK_3	Q3E7A4	>sp|Q3E7A4|COXM2_YEAST COX assembly mitochondrial protein 2 OS=Saccharomyces cerevisiae (strain ATCC 204508 / S288c) GN=CMC2 PE=1 SV=1	13540	38948	51674	118610	0.581653	0.483636	0.532645	0.107887
_AVPIYAT(ph)TSYVFENSK_3	P06106	>sp|P06106|MET17_YEAST Protein MET17 OS=Saccharomyces cerevisiae (strain ATCC 204508 / S288c) GN=MET17 PE=1 SV=3	389560	46635	329010	639830	-0.0733653	1.13735	0.531994	0.282379
_(ac)SQDAAIAEQTPVEHLSAVDSAS(ph)HS(ph)VLS(ph)T(ph)PSNKAER_3	P39004;P39003	>sp|P39004|HXT7_YEAST High-affinity hexose transporter HXT6 OS=Saccharomyces cerevisiae (strain ATCC 204508 / S288c) GN=HXT7 PE=1 SV=1;>sp|P39003|HXT6_YEAST High-affinity hexose transporter HXT6 OS=Saccharomyces cerevisiae (strain ATCC 204508 / S288c) GN=H	124950	2209400	823680	3882100	0.819022	0.244792	0.531907	0.124047
_S(ph)WSGDNEAHR_2	P39683	>sp|P39683|NPT1_YEAST Nicotinate phosphoribosyltransferase OS=Saccharomyces cerevisiae (strain ATCC 204508 / S288c) GN=NPT1 PE=1 SV=3	20543	202800	208350	231560	1.00613	0.0575956	0.531863	0.201631
_S(ph)LNLNDLLVFDDPLPSK_2	P34244	>sp|P34244|HSL1_YEAST Probable serine/threonine-protein kinase HSL1 OS=Saccharomyces cerevisiae (strain ATCC 204508 / S288c) GN=HSL1 PE=1 SV=2	92643	213150	481120	472620	0.715441	0.345827	0.530634	0.0625578
_(ac)SQDAAIAEQTPVEHLSAVDS(ph)AS(ph)HSVLSTPS(ph)NK_4	P39004;P39003	>sp|P39004|HXT7_YEAST High-affinity hexose transporter HXT6 OS=Saccharomyces cerevisiae (strain ATCC 204508 / S288c) GN=HXT7 PE=1 SV=1;>sp|P39003|HXT6_YEAST High-affinity hexose transporter HXT6 OS=Saccharomyces cerevisiae (strain ATCC 204508 / S288c) GN=H	533560	1778000	1174100	9288000	0.342522	0.71799	0.530256	0.222916
_(ac)NT(ph)NSNTMVMNDANQAQIT(ph)ATFTK_4	P34232	>sp|P34232|MTR2_YEAST mRNA transport regulator MTR2 OS=Saccharomyces cerevisiae (strain ATCC 204508 / S288c) GN=MTR2 PE=1 SV=1	126320	2292500	896900	3707800	0.851272	0.208807	0.530039	0.0912961
_ANAS(ph)DIQDEQLDCFEQLEEK_3	P42934	>sp|P42934|PMT6_YEAST Dolichyl-phosphate-mannose--protein mannosyltransferase 6 OS=Saccharomyces cerevisiae (strain ATCC 204508 / S288c) GN=PMT6 PE=1 SV=1	119770	213570	376070	780180	0.496921	0.562655	0.529788	0.114783
_S(ph)FSHSITTNTPNVK_3	P34219	>sp|P34219|TOD6_YEAST Transcriptional regulatory protein TOD6 OS=Saccharomyces cerevisiae (strain ATCC 204508 / S288c) GN=TOD6 PE=1 SV=1	132380	329550	449110	1111100	0.53053	0.527832	0.529181	0.127441
_PLFSLASES(ph)NR_2	P40476	>sp|P40476|PRM5_YEAST Pheromone-regulated membrane protein 5 OS=Saccharomyces cerevisiae (strain ATCC 204508 / S288c) GN=PRM5 PE=1 SV=1	21938	169080	115130	367480	0.719991	0.337141	0.528566	0.110221
_INELLS(ph)SLEGK_2	P02400	>sp|P02400|RLA4_YEAST 60S acidic ribosomal protein P2-beta OS=Saccharomyces cerevisiae (strain ATCC 204508 / S288c) GN=RPP2B PE=1 SV=2	48011	77804	131990	322160	0.4392	0.61707	0.528135	0.14463
_SNS(ph)AHS(ph)ALNAR_2	Q04279	>sp|Q04279|YMX6_YEAST Uncharacterized protein YMR086W OS=Saccharomyces cerevisiae (strain ATCC 204508 / S288c) GN=YMR086W PE=1 SV=1	450520	1396900	1790400	3996700	0.599236	0.456536	0.527886	0.0985245
_KQAS(ph)AAVSEK_2	Q08245	>sp|Q08245|ZEO1_YEAST Protein ZEO1 OS=Saccharomyces cerevisiae (strain ATCC 204508 / S288c) GN=ZEO1 PE=1 SV=3	951860	2807300	2823100	10656000	0.472153	0.579305	0.525729	0.175501
_NNS(ph)TSTITQHSQR_2	Q02100	>sp|Q02100|SKO1_YEAST CRE-binding bZIP protein SKO1 OS=Saccharomyces cerevisiae (strain ATCC 204508 / S288c) GN=SKO1 PE=1 SV=1	74749	273060	276680	830240	0.568372	0.482946	0.525659	0.139326
_VAS(ph)S(ph)SPLKPTS(ph)PTVPDASVASLR_3	P31380	>sp|P31380|FUN30_YEAST ATP-dependent helicase FUN30 OS=Saccharomyces cerevisiae (strain ATCC 204508 / S288c) GN=FUN30 PE=1 SV=1	125890	210770	291330	1022800	0.364394	0.685982	0.525188	0.186024
_SS(ph)KS(ph)FLNFIGR_3	Q08732	>sp|Q08732|HRK1_YEAST Serine/threonine-protein kinase HRK1 OS=Saccharomyces cerevisiae (strain ATCC 204508 / S288c) GN=HRK1 PE=1 SV=1	104580	280940	452800	728300	0.636458	0.413697	0.525077	0.0394623
_LGS(ph)TIDAADEVVEDNT(ph)SQSQR_2	P34223	>sp|P34223|UBX1_YEAST UBX domain-containing protein 1 OS=Saccharomyces cerevisiae (strain ATCC 204508 / S288c) GN=SHP1 PE=1 SV=1	36272	39155	89273	177970	0.391149	0.65756	0.524354	0.133903
_LITRDLS(ph)ER_3	P05986	>sp|P05986|KAPC_YEAST cAMP-dependent protein kinase type 3 OS=Saccharomyces cerevisiae (strain ATCC 204508 / S288c) GN=TPK3 PE=1 SV=2	83480	19909	77045	240670	-0.034838	1.08237	0.523767	0.259276
_KSS(ph)LTLVK_2	P47019	>sp|P47019|ALB1_YEAST Ribosome biogenesis protein ALB1 OS=Saccharomyces cerevisiae (strain ATCC 204508 / S288c) GN=ALB1 PE=1 SV=1	197380	400160	518450	1695300	0.419404	0.627013	0.523208	0.172649
_S(ph)LSHSGLDDGLEQGLNR_2	P34217	>sp|P34217|PIN4_YEAST RNA-binding protein PIN4 OS=Saccharomyces cerevisiae (strain ATCC 204508 / S288c) GN=PIN4 PE=1 SV=1	900150	2901100	3385300	8582400	0.575282	0.471046	0.523164	0.118745
_NDAS(ph)FKNPSGIGNDNSK_2	P18961	>sp|P18961|YPK2_YEAST Serine/threonine-protein kinase YPK2/YKR2 OS=Saccharomyces cerevisiae (strain ATCC 204508 / S288c) GN=YPK2 PE=1 SV=1	51257	118240	147080	458320	0.4578	0.588404	0.523102	0.162578
_(ac)S(ph)SQNLNDNPK_2	Q12034	>sp|Q12034|SLF1_YEAST Protein SLF1 OS=Saccharomyces cerevisiae (strain ATCC 204508 / S288c) GN=SLF1 PE=1 SV=1	94478	192400	292720	688870	0.491122	0.553932	0.522527	0.129072
_NNGS(ph)YVLDNSLTNAGTGSSSK_2	P01119	>sp|P01119|RAS1_YEAST Ras-like protein 1 OS=Saccharomyces cerevisiae (strain ATCC 204508 / S288c) GN=RAS1 PE=1 SV=2	38141	370510	270480	578980	0.850743	0.193864	0.522303	0.0172191
_LVS(ph)SNDVGVLLR_2	P38833	>sp|P38833|YHS7_YEAST Uncharacterized protein YHR127W OS=Saccharomyces cerevisiae (strain ATCC 204508 / S288c) GN=YHR127W PE=1 SV=1	147920	377630	440010	1406400	0.473436	0.571042	0.522239	0.161942
_MNS(ph)ATS(ph)QEDLFNETK_2	Q03897	>sp|Q03897|WDR59_YEAST Maintenance of telomere capping protein 5 OS=Saccharomyces cerevisiae (strain ATCC 204508 / S288c) GN=MTC5 PE=1 SV=1	419850	454380	1245900	1693800	0.472389	0.571443	0.521916	0.0628739
_FNNHNQSNS(ph)NR_3	P39936	>sp|P39936|IF4F2_YEAST Eukaryotic initiation factor 4F subunit p130 OS=Saccharomyces cerevisiae (strain ATCC 204508 / S288c) GN=TIF4632 PE=1 SV=1	861980	3617100	2898100	11875000	0.526616	0.516273	0.521445	0.17305
_ILSSS(ph)FHN_2	P33419	>sp|P33419|SPC29_YEAST Spindle pole component 29 OS=Saccharomyces cerevisiae (strain ATCC 204508 / S288c) GN=SPC29 PE=1 SV=1	230230	508500	710960	1814800	0.489683	0.552538	0.521111	0.137755
_TLS(ph)VLTNYVMR_2	P36094	>sp|P36094|SPC42_YEAST Spindle pole body component SPC42 OS=Saccharomyces cerevisiae (strain ATCC 204508 / S288c) GN=SPC42 PE=1 SV=1	43966	105200	207680	245370	0.674278	0.367806	0.521042	0.0246125
_LGTPSEDTVS(ph)AAATANNISTMGDESR_3	P37304	>sp|P37304|PAM1_YEAST Protein PAM1 OS=Saccharomyces cerevisiae (strain ATCC 204508 / S288c) GN=PAM1 PE=1 SV=2	71889	238470	329770	572670	0.661549	0.380471	0.52101	0.040805
_KKS(ph)SIS(ph)NTS(ph)DHDGANR_3	Q03559	>sp|Q03559|YM8V_YEAST Uncharacterized protein YMR295C OS=Saccharomyces cerevisiae (strain ATCC 204508 / S288c) GN=YMR295C PE=1 SV=1	1868700	184530	1070100	3549200	-0.242115	1.28406	0.520974	0.324178
_S(ph)PAISSAELFEGYDSLPER_3	Q06315	>sp|Q06315|SKG3_YEAST Protein SKG3 OS=Saccharomyces cerevisiae (strain ATCC 204508 / S288c) GN=SKG3 PE=1 SV=1	28503	58524	68375	268660	0.380007	0.661869	0.520938	0.190312
_HSLS(ph)NGSLSVYDAK_2	Q06116	>sp|Q06116|YP117_YEAST Uncharacterized protein YPR117W OS=Saccharomyces cerevisiae (strain ATCC 204508 / S288c) GN=YPR117W PE=1 SV=1	14734	209260	134740	251540	0.961176	0.0799208	0.520548	0.142177
_(ac)T(ph)DRYSFSLTTFSPSGK_2	P23639	>sp|P23639|PSA2_YEAST Proteasome subunit alpha type-2 OS=Saccharomyces cerevisiae (strain ATCC 204508 / S288c) GN=PRE8 PE=1 SV=1	92798	400670	345920	1181300	0.571437	0.469573	0.520505	0.150192
_NDDSSSTTATNSGNDVAS(ph)AR_2	P39960	>sp|P39960|BEM2_YEAST GTPase-activating protein BEM2/IPL2 OS=Saccharomyces cerevisiae (strain ATCC 204508 / S288c) GN=BEM2 PE=1 SV=1	108170	278940	341200	971540	0.498902	0.54195	0.520426	0.14669
_QIVKT(ph)PIPK_2	Q01766	>sp|Q01766|HAL1_YEAST Halotolerance protein HAL1 OS=Saccharomyces cerevisiae (strain ATCC 204508 / S288c) GN=HAL1 PE=1 SV=1	38948	172410	138910	530190	0.552248	0.487869	0.520059	0.163277
_RNPS(ph)DEKNDSR_3	Q07793;Q04670;Q92393;Q12316;Q12193	>sp|Q07793|YD13B_YEAST Transposon Ty1-DR4 Gag-Pol polyprotein OS=Saccharomyces cerevisiae (strain ATCC 204508 / S288c) GN=TY1B-DR4 PE=3 SV=2;>sp|Q04670|YM14B_YEAST Transposon Ty1-MR2 Gag-Pol polyprotein OS=Saccharomyces cerevisiae (strain ATCC 204508 / S28	2647400	2155500	3642400	17175000	0.138568	0.901349	0.519958	0.228944
_RSPS(ph)NLNSTSVT(ph)PR_2	Q03640	>sp|Q03640|TCB3_YEAST Tricalbin-3 OS=Saccharomyces cerevisiae (strain ATCC 204508 / S288c) GN=TCB3 PE=1 SV=1	675960	1166500	1737600	4961100	0.410029	0.628693	0.519361	0.163165
_HTS(ph)SS(ph)TSVGCK_2	Q03016	>sp|Q03016|GIP3_YEAST GLC7-interacting protein 3 OS=Saccharomyces cerevisiae (strain ATCC 204508 / S288c) GN=GIP3 PE=1 SV=1	23884	63106	80217	205130	0.526159	0.511959	0.519059	0.129803
_LGS(ph)TIDAADEVVEDNTSQSQR_3	P34223	>sp|P34223|UBX1_YEAST UBX domain-containing protein 1 OS=Saccharomyces cerevisiae (strain ATCC 204508 / S288c) GN=SHP1 PE=1 SV=1	1488600	4497500	4937900	14790000	0.520764	0.516997	0.518881	0.14707
_LAGTSS(ph)CIEGEDGSETKEER_3	P38772	>sp|P38772|BCD1_YEAST Box C/D snoRNA protein 1 OS=Saccharomyces cerevisiae (strain ATCC 204508 / S288c) GN=BCD1 PE=1 SV=1	144380	311120	407590	1200400	0.450716	0.586398	0.518557	0.158401
_S(ph)DSASFLEEKEEPQENHDNKEEQS_3	P38199	>sp|P38199|HEK2_YEAST Heterogeneous nuclear rnp K-like protein 2 OS=Saccharomyces cerevisiae (strain ATCC 204508 / S288c) GN=HEK2 PE=1 SV=1	3999300	2526700	5729700	19200000	0.156148	0.880748	0.518448	0.217083
_KLDGSNEASANDEES(ph)FDVGR_3	P10964	>sp|P10964|RPA1_YEAST DNA-directed RNA polymerase I subunit RPA190 OS=Saccharomyces cerevisiae (strain ATCC 204508 / S288c) GN=RPA190 PE=1 SV=2	57240	90541	158450	355630	0.442193	0.594153	0.518173	0.133907
_LAVLS(ph)YYK_2	P05759	>sp|P05759|RS27A_YEAST Ubiquitin-40S ribosomal protein S31 OS=Saccharomyces cerevisiae (strain ATCC 204508 / S288c) GN=RPS31 PE=1 SV=3	50267	78684	121390	354180	0.3829	0.653338	0.518119	0.16958
_EEAAPKPPS(ph)SAVFSMFGGK_3	P41920	>sp|P41920|YRB1_YEAST Ran-specific GTPase-activating protein 1 OS=Saccharomyces cerevisiae (strain ATCC 204508 / S288c) GN=YRB1 PE=1 SV=1	267880	122760	539370	662590	0.303946	0.732188	0.518067	0.101674
_SIS(ph)IVGSYVGNR_2	P00330;P00331	>sp|P00330|ADH1_YEAST Alcohol dehydrogenase 1 OS=Saccharomyces cerevisiae (strain ATCC 204508 / S288c) GN=ADH1 PE=1 SV=5;>sp|P00331|ADH2_YEAST Alcohol dehydrogenase 2 OS=Saccharomyces cerevisiae (strain ATCC 204508 / S288c) GN=ADH2 PE=1 SV=3	246080	520730	834950	1664500	0.530584	0.504671	0.517628	0.0986574
_QMAEGFASGGGTPNLS(ph)DLMNNPALR_3	Q12118	>sp|Q12118|SGT2_YEAST Small glutamine-rich tetratricopeptide repeat-containing protein 2 OS=Saccharomyces cerevisiae (strain ATCC 204508 / S288c) GN=SGT2 PE=1 SV=1	114160	126180	431680	361850	0.577648	0.457538	0.517593	0.0467579
_SQQGLSHVTSTGS(ph)SSSMER_2	P32566	>sp|P32566|SMI1_YEAST Cell wall assembly regulator SMI1 OS=Saccharomyces cerevisiae (strain ATCC 204508 / S288c) GN=SMI1 PE=1 SV=1	152350	223140	557640	660190	0.563511	0.471092	0.517301	0.011996
_AS(ph)YVGDSSQVEDPGAVGLCEFLK_2	P54838	>sp|P54838|DAK1_YEAST Dihydroxyacetone kinase 1 OS=Saccharomyces cerevisiae (strain ATCC 204508 / S288c) GN=DAK1 PE=1 SV=1	110400	166930	249140	797320	0.353474	0.679098	0.516286	0.181044
_S(ph)TSAGNSITANAPVVPK_2	P48361	>sp|P48361|ASK10_YEAST Activator of SKN7 protein 10 OS=Saccharomyces cerevisiae (strain ATCC 204508 / S288c) GN=ASK10 PE=1 SV=2	785800	1048600	1685500	5265600	0.331417	0.700838	0.516127	0.183092
_AIVQVFEGT(ph)SGIDVK_2	P16140	>sp|P16140|VATB_YEAST V-type proton ATPase subunit B OS=Saccharomyces cerevisiae (strain ATCC 204508 / S288c) GN=VMA2 PE=1 SV=2	100160	188820	286540	710730	0.456491	0.575657	0.516074	0.140821
_FGNNS(ph)S(ph)RGHDFR_3	P39935	>sp|P39935|IF4F1_YEAST Eukaryotic initiation factor 4F subunit p150 OS=Saccharomyces cerevisiae (strain ATCC 204508 / S288c) GN=TIF4631 PE=1 SV=2	1445700	2341700	3387000	10761000	0.369737	0.662321	0.516029	0.177866
_VEPGLGM(ox)GITSS(ph)QSEK_2	P32457	>sp|P32457|CDC3_YEAST Cell division control protein 3 OS=Saccharomyces cerevisiae (strain ATCC 204508 / S288c) GN=CDC3 PE=1 SV=3	39609	572510	76624	3181600	0.286571	0.744863	0.515717	0.245484
_WS(ph)FEEVEVK_2	P26783	>sp|P26783|RS5_YEAST 40S ribosomal protein S5 OS=Saccharomyces cerevisiae (strain ATCC 204508 / S288c) GN=RPS5 PE=1 SV=3	98711	280830	433250	686880	0.642373	0.388437	0.515405	0.0306409
_SSQIHIENES(ph)TEDILK_3	P33419	>sp|P33419|SPC29_YEAST Spindle pole component 29 OS=Saccharomyces cerevisiae (strain ATCC 204508 / S288c) GN=SPC29 PE=1 SV=1	111980	815740	617300	1587600	0.741356	0.289189	0.515273	0.0654895
_ASEALKPDSQKS(ph)YAEQGK_3	P22943	>sp|P22943|HSP12_YEAST 12 kDa heat shock protein OS=Saccharomyces cerevisiae (strain ATCC 204508 / S288c) GN=HSP12 PE=1 SV=1	7991500	22977000	27727000	70860000	0.540275	0.489108	0.514691	0.125558
_QSTNFTHS(ph)T(ph)GSFLQSAPVELTTVSGYQEFLKK_4	O43137	>sp|O43137|YB085_YEAST Uncharacterized protein YBR085C-A OS=Saccharomyces cerevisiae (strain ATCC 204508 / S288c) GN=YBR085C-A PE=1 SV=1	374800	572800	905370	2530400	0.383027	0.645186	0.514106	0.165752
_QNS(ph)TPVLPTLPQNVPIR_3	Q04195	>sp|Q04195|SIZ1_YEAST E3 SUMO-protein ligase SIZ1 OS=Saccharomyces cerevisiae (strain ATCC 204508 / S288c) GN=SIZ1 PE=1 SV=1	50739	97977	120880	437440	0.377013	0.649794	0.513403	0.185142
_KVSS(ph)IIGGK_2	P40825	>sp|P40825|SYA_YEAST Alanine--tRNA ligase, mitochondrial OS=Saccharomyces cerevisiae (strain ATCC 204508 / S288c) GN=ALA1 PE=1 SV=3	468430	592550	982890	2998000	0.32186	0.704107	0.512983	0.182933
_INDTGS(ph)ATTATTTTATETEIKPK_3	P16649	>sp|P16649|TUP1_YEAST General transcriptional corepressor TUP1 OS=Saccharomyces cerevisiae (strain ATCC 204508 / S288c) GN=TUP1 PE=1 SV=2	1057300	2393600	2557100	10480000	0.383549	0.64131	0.51243	0.191626
_QEAGAFT(ph)FNEDF_2	P09938	>sp|P09938|RIR2_YEAST Ribonucleoside-diphosphate reductase small chain 1 OS=Saccharomyces cerevisiae (strain ATCC 204508 / S288c) GN=RNR2 PE=1 SV=2	96385	171850	328910	532970	0.533068	0.491553	0.51231	0.067903
_AST(ph)AVES(ph)LDNHPPK_2	P25297	>sp|P25297|PHO84_YEAST Inorganic phosphate transporter PHO84 OS=Saccharomyces cerevisiae (strain ATCC 204508 / S288c) GN=PHO84 PE=1 SV=2	149520	596800	341050	2766200	0.358119	0.666055	0.512087	0.22197
_S(ph)TTSASLENDSEVSDPVVVETMK_3	Q06697	>sp|Q06697|CDC73_YEAST Cell division control protein 73 OS=Saccharomyces cerevisiae (strain ATCC 204508 / S288c) GN=CDC73 PE=1 SV=1	143840	202480	488250	627830	0.530763	0.49146	0.511111	0.0333476
_DAMM(ox)S(ph)APGSRS(ph)NS(ph)R_3	P06634	>sp|P06634|DED1_YEAST ATP-dependent RNA helicase DED1 OS=Saccharomyces cerevisiae (strain ATCC 204508 / S288c) GN=DED1 PE=1 SV=2	59138	252320	114810	1366600	0.288113	0.73369	0.510901	0.23411
_S(ph)RS(ph)AINIETESR_3	P53076	>sp|P53076|VID30_YEAST Vacuolar import and degradation protein 30 OS=Saccharomyces cerevisiae (strain ATCC 204508 / S288c) GN=VID30 PE=1 SV=1	108140	296610	377930	891430	0.543425	0.477901	0.510663	0.114459
_FIRPS(ph)KDNSDVER_3	P36165	>sp|P36165|TGL4_YEAST Lipase 4 OS=Saccharomyces cerevisiae (strain ATCC 204508 / S288c) GN=TGL4 PE=1 SV=1	167830	266570	427550	1095500	0.406117	0.613801	0.509959	0.153351
_KLVLS(ph)S(ph)GENR_2	Q12267	>sp|Q12267|SMC4_YEAST Structural maintenance of chromosomes protein 4 OS=Saccharomyces cerevisiae (strain ATCC 204508 / S288c) GN=SMC4 PE=1 SV=1	32499	43502	74494	198500	0.360251	0.659251	0.509751	0.165779
_PPASTSTTNDM(ox)ITEEPT(ph)SPHQIPR_4	P06738	>sp|P06738|PHSG_YEAST Glycogen phosphorylase OS=Saccharomyces cerevisiae (strain ATCC 204508 / S288c) GN=GPH1 PE=1 SV=4	152240	772150	252150	4872200	0.21913	0.800023	0.509577	0.242245
_VSGSTAGDS(ph)SIASSSSNLR_2	P38426	>sp|P38426|TPS3_YEAST Trehalose synthase complex regulatory subunit TPS3 OS=Saccharomyces cerevisiae (strain ATCC 204508 / S288c) GN=TPS3 PE=1 SV=3	20883	88413	63562	303510	0.483405	0.535657	0.509531	0.187652
_NNTQS(ph)SDFIR_2	P33301	>sp|P33301|XRS2_YEAST DNA repair protein XRS2 OS=Saccharomyces cerevisiae (strain ATCC 204508 / S288c) GN=XRS2 PE=1 SV=1	30604	31844	43382	234000	0.151531	0.866188	0.50886	0.229907
_KNDS(ph)DVPELATIPAAK_3	P48570	>sp|P48570|HOSC_YEAST Homocitrate synthase, cytosolic isozyme OS=Saccharomyces cerevisiae (strain ATCC 204508 / S288c) GN=LYS20 PE=1 SV=1	84273	295300	289620	894390	0.53614	0.481263	0.508702	0.144889
_KLS(ph)GTNAVLEK_2	P53064	>sp|P53064|RTF1_YEAST RNA polymerase-associated protein RTF1 OS=Saccharomyces cerevisiae (strain ATCC 204508 / S288c) GN=RTF1 PE=1 SV=2	348410	537850	991580	1966300	0.454237	0.562989	0.508613	0.115333
_VAAEQPSTLNAES(ph)IKGEDSGSADVQSVQDHESVK_4	P32566	>sp|P32566|SMI1_YEAST Cell wall assembly regulator SMI1 OS=Saccharomyces cerevisiae (strain ATCC 204508 / S288c) GN=SMI1 PE=1 SV=1	2007600	5179600	6106600	17695000	0.483122	0.533554	0.508338	0.149253
_QHTGQSHSAS(ph)SLLSQGSLTNLSK_3	P41832	>sp|P41832|BNI1_YEAST Protein BNI1 OS=Saccharomyces cerevisiae (strain ATCC 204508 / S288c) GN=BNI1 PE=1 SV=3	350050	70572	392770	653510	0.0500082	0.96662	0.508314	0.226715
_WTNVS(ph)QMPK_3	P37370	>sp|P37370|VRP1_YEAST Verprolin OS=Saccharomyces cerevisiae (strain ATCC 204508 / S288c) GN=VRP1 PE=1 SV=2	198190	779380	611730	2615800	0.489478	0.525855	0.507667	0.179496
_DDQNNGKPNLS(ph)SR_3	P40064	>sp|P40064|NU157_YEAST Nucleoporin NUP157 OS=Saccharomyces cerevisiae (strain ATCC 204508 / S288c) GN=NUP157 PE=1 SV=1	17260	96281	69773	246330	0.606647	0.407977	0.507312	0.142841
_SNPGSLINGVQSTSTSSSTEGPHDT(ph)VGTTPR_3	P08018	>sp|P08018|PBS2_YEAST MAP kinase kinase PBS2 OS=Saccharomyces cerevisiae (strain ATCC 204508 / S288c) GN=PBS2 PE=1 SV=4	63383	246020	223800	720570	0.547887	0.466706	0.507297	0.146237
_S(ph)VESDLHEHS(ph)PDNLYDLAAR_3	Q03661	>sp|Q03661|ESC1_YEAST Silent chromatin protein ESC1 OS=Saccharomyces cerevisiae (strain ATCC 204508 / S288c) GN=ESC1 PE=1 SV=1	159210	349820	486970	1181900	0.485532	0.528736	0.507134	0.130557
_S(ph)FNSTETKPVFATK_2	P32787	>sp|P32787|MG101_YEAST Mitochondrial genome maintenance protein MGM101 OS=Saccharomyces cerevisiae (strain ATCC 204508 / S288c) GN=MGM101 PE=1 SV=1	163330	290100	404330	1210700	0.39367	0.620489	0.507079	0.1685
_VVQNS(ph)PVS(ph)SVHTANFSER_3	Q12124	>sp|Q12124|MED2_YEAST Mediator of RNA polymerase II transcription subunit 2 OS=Saccharomyces cerevisiae (strain ATCC 204508 / S288c) GN=MED2 PE=1 SV=1	113510	406140	481360	988750	0.627436	0.386411	0.506923	0.0707355
_EYS(ph)NVDQYGHQR_3	P53932	>sp|P53932|YNJ5_YEAST Uncharacterized transporter YNL095C OS=Saccharomyces cerevisiae (strain ATCC 204508 / S288c) GN=YNL095C PE=1 SV=1	90854	394510	414310	892760	0.658981	0.354677	0.506829	0.0667167
_M(ox)DTQM(ox)T(ph)LS(ph)GDEGEAEEGGGRK_3	Q99271	>sp|Q99271|NAH1_YEAST Na(+)/H(+) antiporter OS=Saccharomyces cerevisiae (strain ATCC 204508 / S288c) GN=NHA1 PE=1 SV=1	58301	145500	91451	956360	0.195512	0.817758	0.506635	0.236994
_HFIQGGS(ph)FGNR_2	P05737;Q12213	>sp|P05737|RL7A_YEAST 60S ribosomal protein L7-A OS=Saccharomyces cerevisiae (strain ATCC 204508 / S288c) GN=RPL7A PE=1 SV=3;>sp|Q12213|RL7B_YEAST 60S ribosomal protein L7-B OS=Saccharomyces cerevisiae (strain ATCC 204508 / S288c) GN=RPL7B PE=1 SV=3	386300	1253100	1408500	3532600	0.561832	0.450109	0.50597	0.115817
_DVAAQDFINAYAS(ph)FLQR_3	P07280;P07281	>sp|P07280|RS19A_YEAST 40S ribosomal protein S19-A OS=Saccharomyces cerevisiae (strain ATCC 204508 / S288c) GN=RPS19A PE=1 SV=2;>sp|P07281|RS19B_YEAST 40S ribosomal protein S19-B OS=Saccharomyces cerevisiae (strain ATCC 204508 / S288c) GN=RPS19B PE=1 SV=2	39488	102830	157000	264710	0.599435	0.410651	0.505043	0.0501296
_NNS(ph)KEGSAFK_2	P47077	>sp|P47077|NOP9_YEAST Nucleolar protein 9 OS=Saccharomyces cerevisiae (strain ATCC 204508 / S288c) GN=NOP9 PE=1 SV=1	339290	1255700	1118800	3896100	0.518181	0.491744	0.504963	0.158623
_SHGS(ph)SNIDLPASLR_2	P43565	>sp|P43565|RIM15_YEAST Serine/threonine-protein kinase RIM15 OS=Saccharomyces cerevisiae (strain ATCC 204508 / S288c) GN=RIM15 PE=1 SV=1	48015	868430	430400	990590	0.952495	0.0571591	0.504827	0.151572
_TTS(ph)AGS(ph)VLEDTSMHK_3	P53858	>sp|P53858|BNI4_YEAST Protein BNI4 OS=Saccharomyces cerevisiae (strain ATCC 204508 / S288c) GN=BNI4 PE=1 SV=1	126890	232090	463490	649230	0.562613	0.446742	0.504678	0.0338841
_QHVS(ph)STASITSGGHNDLVQIEQPQK_4	P11938	>sp|P11938|RAP1_YEAST DNA-binding protein RAP1 OS=Saccharomyces cerevisiae (strain ATCC 204508 / S288c) GN=RAP1 PE=1 SV=2	57708	145490	218550	392340	0.578315	0.430829	0.504572	0.0661812
_SDVSQNQNVAS(ph)GFFK_2	P38691	>sp|P38691|KSP1_YEAST Serine/threonine-protein kinase KSP1 OS=Saccharomyces cerevisiae (strain ATCC 204508 / S288c) GN=KSP1 PE=1 SV=1	32456	198330	150770	435610	0.66702	0.341709	0.504365	0.102766
_QLS(ph)SLFLDGLEK_2	P19097	>sp|P19097|FAS2_YEAST Fatty acid synthase subunit alpha OS=Saccharomyces cerevisiae (strain ATCC 204508 / S288c) GN=FAS2 PE=1 SV=2	37577	86018	124020	265380	0.51857	0.489279	0.503924	0.107047
_LMNNDS(ph)FQK_2	P11972	>sp|P11972|SST2_YEAST Protein SST2 OS=Saccharomyces cerevisiae (strain ATCC 204508 / S288c) GN=SST2 PE=1 SV=2	49843	73316	164890	225520	0.51959	0.487986	0.503788	0.043974
_LGSLVGQDS(ph)GYVGGLPK_2	P25293	>sp|P25293|NAP1_YEAST Nucleosome assembly protein OS=Saccharomyces cerevisiae (strain ATCC 204508 / S288c) GN=NAP1 PE=1 SV=2	550130	1054200	1552200	3800700	0.450482	0.556941	0.503711	0.138641
_CPS(ph)AVLSVHSNPVLQK_3	P39113	>sp|P39113|CAT8_YEAST Regulatory protein CAT8 OS=Saccharomyces cerevisiae (strain ATCC 204508 / S288c) GN=CAT8 PE=1 SV=2	21015	54560	72966	159800	0.540591	0.466702	0.503647	0.104039
_ATGAPS(ph)ANQGDEALSVDDIR_2	P53330	>sp|P53330|RT102_YEAST Regulator of Ty1 transposition protein 102 OS=Saccharomyces cerevisiae (strain ATCC 204508 / S288c) GN=RTT102 PE=1 SV=2	408970	104390	409040	1060800	7.43282e-05	1.00697	0.503524	0.249977
_S(ph)SSFISILDDETR_2	P27515	>sp|P27515|URK1_YEAST Uridine kinase OS=Saccharomyces cerevisiae (strain ATCC 204508 / S288c) GN=URK1 PE=1 SV=1	202680	1684000	1272500	2723400	0.797847	0.208769	0.503308	0.00459047
_KLAS(ph)SGEVDKIESPR_3	P23201	>sp|P23201|SPA2_YEAST Protein SPA2 OS=Saccharomyces cerevisiae (strain ATCC 204508 / S288c) GN=SPA2 PE=1 SV=1	385320	1047300	1376100	2973200	0.552828	0.453153	0.502991	0.0987579
_IRS(ph)S(ph)ASASGR_2	P30665	>sp|P30665|MCM4_YEAST DNA replication licensing factor MCM4 OS=Saccharomyces cerevisiae (strain ATCC 204508 / S288c) GN=MCM4 PE=1 SV=2	43298	40182	80078	219810	0.267045	0.738016	0.502531	0.185713
_RST(ph)ANAT(ph)PVETGR_2	P48524	>sp|P48524|BUL1_YEAST Ubiquitin ligase-binding protein BUL1 OS=Saccharomyces cerevisiae (strain ATCC 204508 / S288c) GN=BUL1 PE=1 SV=1	25191	183020	131310	354640	0.717052	0.287289	0.502171	0.073722
_(ac)SQDAAIAEQTPVEHLSAVDSASHS(ph)VLSTPSNK_3	P39004;P39003	>sp|P39004|HXT7_YEAST High-affinity hexose transporter HXT6 OS=Saccharomyces cerevisiae (strain ATCC 204508 / S288c) GN=HXT7 PE=1 SV=1;>sp|P39003|HXT6_YEAST High-affinity hexose transporter HXT6 OS=Saccharomyces cerevisiae (strain ATCC 204508 / S288c) GN=H	878300	527970	74302	62934000	-1.07264	2.07628	0.501817	0.254101
_SDS(ph)YMLHK_2	Q01939	>sp|Q01939|PRS8_YEAST 26S protease regulatory subunit 8 homolog OS=Saccharomyces cerevisiae (strain ATCC 204508 / S288c) GN=RPT6 PE=1 SV=4	60029	85786	258830	200550	0.634654	0.368806	0.50173	0.0833499
_GDLNANSNAAS(ph)ASNSTDNKSET(ph)FNK_3	P29295	>sp|P29295|HRR25_YEAST Casein kinase I homolog HRR25 OS=Saccharomyces cerevisiae (strain ATCC 204508 / S288c) GN=HRR25 PE=1 SV=1	118010	199400	460960	513040	0.591744	0.410426	0.501085	0.0141998
_IINS(ph)S(ph)VVASDQR_2	REV__P07257	>sp|P07257|QCR2_YEAST Cytochrome b-c1 complex subunit 2, mitochondrial OS=Saccharomyces cerevisiae (strain ATCC 204508 / S288c) GN=QCR2 PE=1 SV=1	64524	224180	188520	770440	0.465636	0.536142	0.500889	0.178951
_MDLFYPQRES(ph)FSEGR_3	P53316	>sp|P53316|YG5B_YEAST Uncharacterized RNA-binding protein YGR250C OS=Saccharomyces cerevisiae (strain ATCC 204508 / S288c) GN=YGR250C PE=1 SV=1	339310	546690	1027700	1811400	0.48127	0.520273	0.500771	0.0913348
_YDDYNDSSS(ph)NNGNGSR_2	P25555	>sp|P25555|GBP2_YEAST Single-strand telomeric DNA-binding protein GBP2 OS=Saccharomyces cerevisiae (strain ATCC 204508 / S288c) GN=GBP2 PE=1 SV=1	38454	23645	42924	212210	0.0477587	0.953027	0.500393	0.242456
_T(ph)GTSCLLNGIESPQLPFNGR_3	P12383	>sp|P12383|PDR1_YEAST Transcription factor PDR1 OS=Saccharomyces cerevisiae (strain ATCC 204508 / S288c) GN=PDR1 PE=1 SV=2	17294	50912	69245	127340	0.602493	0.398145	0.500319	0.0599698
_SPQENDTVVDILGDAHSKS(ph)S(ph)GIDLLDFDSQPGESK_4	Q06336	>sp|Q06336|GGA1_YEAST ADP-ribosylation factor-binding protein GGA1 OS=Saccharomyces cerevisiae (strain ATCC 204508 / S288c) GN=GGA1 PE=1 SV=1	848590	970710	2184000	3773000	0.410555	0.589597	0.500076	0.108446
_IQVS(ph)DTSDDETQAHHK_3	P38883	>sp|P38883|RIX1_YEAST Pre-rRNA-processing protein RIX1 OS=Saccharomyces cerevisiae (strain ATCC 204508 / S288c) GN=RIX1 PE=1 SV=2	107420	207330	275910	807410	0.409682	0.590432	0.500057	0.162869
_CIQT(ph)MYS(ph)AAR_2	REV__Q02785	>sp|Q02785|PDR12_YEAST ATP-dependent permease PDR12 OS=Saccharomyces cerevisiae (strain ATCC 204508 / S288c) GN=PDR12 PE=1 SV=1	18774	51754	59444	163250	0.500551	0.498909	0.49973	0.138665
_YIDQS(ph)SDLLSR_2	P40317	>sp|P40317|SOK1_YEAST Protein SOK1 OS=Saccharomyces cerevisiae (strain ATCC 204508 / S288c) GN=SOK1 PE=1 SV=2	37098	116600	115980	371650	0.495033	0.503436	0.499234	0.154523
_S(ph)LSSQNIDADDPTQFENLK_2	P11075	>sp|P11075|SEC7_YEAST Protein transport protein SEC7 OS=Saccharomyces cerevisiae (strain ATCC 204508 / S288c) GN=SEC7 PE=1 SV=2	285160	706100	943710	2116500	0.51975	0.476752	0.498251	0.11095
_DNETPS(ph)KKTS(ph)PK_2	P20676	>sp|P20676|NUP1_YEAST Nucleoporin NUP1 OS=Saccharomyces cerevisiae (strain ATCC 204508 / S288c) GN=NUP1 PE=1 SV=1	58911	221960	179320	723130	0.483432	0.512942	0.498187	0.174947
_SDSGTVLGAIPLNS(ph)R_2	Q08422	>sp|Q08422|YO052_YEAST AN1-type zinc finger protein YOR052C OS=Saccharomyces cerevisiae (strain ATCC 204508 / S288c) GN=YOR052C PE=1 SV=1	403910	801120	1391300	2304700	0.537136	0.458917	0.498027	0.065041
_T(ph)SLEGTTVQVK_2	P12383	>sp|P12383|PDR1_YEAST Transcription factor PDR1 OS=Saccharomyces cerevisiae (strain ATCC 204508 / S288c) GN=PDR1 PE=1 SV=2	149610	597430	474490	1866100	0.501266	0.494648	0.497957	0.170202
_GTINPS(ph)NSSVVPVR_2	P12688	>sp|P12688|YPK1_YEAST Serine/threonine-protein kinase YPK1 OS=Saccharomyces cerevisiae (strain ATCC 204508 / S288c) GN=YPK1 PE=1 SV=2	16567	323330	133450	396600	0.906075	0.0887067	0.497391	0.0717655
_LEKPSDDS(ph)IHQNSK_3	O13297	>sp|O13297|CET1_YEAST mRNA-capping enzyme subunit beta OS=Saccharomyces cerevisiae (strain ATCC 204508 / S288c) GN=CET1 PE=1 SV=2	179340	372760	365530	1802000	0.309246	0.684325	0.496786	0.208765
_TIVM(ox)GAS(ph)FR_2	P15019	>sp|P15019|TAL1_YEAST Transaldolase OS=Saccharomyces cerevisiae (strain ATCC 204508 / S288c) GN=TAL1 PE=1 SV=4	26575	67125	38724	453840	0.163507	0.830018	0.496763	0.240003
_ASEALKPDS(ph)QKSYAEQGK_4	P22943	>sp|P22943|HSP12_YEAST 12 kDa heat shock protein OS=Saccharomyces cerevisiae (strain ATCC 204508 / S288c) GN=HSP12 PE=1 SV=1	850140	1433600	2049400	5852900	0.382136	0.610943	0.49654	0.165652
_IPS(ph)SIYGDNLTPANQIK_2	P38853	>sp|P38853|KEL1_YEAST Kelch repeat-containing protein 1 OS=Saccharomyces cerevisiae (strain ATCC 204508 / S288c) GN=KEL1 PE=1 SV=1	43257	467160	262880	752480	0.783701	0.207029	0.495365	0.0411832
_FGNNS(ph)S(ph)RGHDFR_2	P39935	>sp|P39935|IF4F1_YEAST Eukaryotic initiation factor 4F subunit p150 OS=Saccharomyces cerevisiae (strain ATCC 204508 / S288c) GN=TIF4631 PE=1 SV=2	303500	482570	516120	2774600	0.230592	0.75964	0.495116	0.220556
_NIDVSNLPS(ph)LA_2	P39015	>sp|P39015|STM1_YEAST Suppressor protein STM1 OS=Saccharomyces cerevisiae (strain ATCC 204508 / S288c) GN=STM1 PE=1 SV=3	118880	236150	339540	808180	0.455782	0.53432	0.495051	0.132811
_SSFGSTGNTAYST(ph)PLHS(ph)PALR_3	P33329	>sp|P33329|PPZ2_YEAST Serine/threonine-protein phosphatase PP-Z2 OS=Saccharomyces cerevisiae (strain ATCC 204508 / S288c) GN=PPZ2 PE=1 SV=4	52734	178200	146670	626050	0.444251	0.545701	0.494976	0.184189
_MRS(ph)HTNSASDLDSVS(ph)PVEQLR_3	P38758	>sp|P38758|TDA3_YEAST Putative oxidoreductase TDA3 OS=Saccharomyces cerevisiae (strain ATCC 204508 / S288c) GN=TDA3 PE=1 SV=2	67029	175080	252670	453790	0.576291	0.413618	0.494955	0.062964
_GNVNTS(ph)QTEQSK_2	Q03761	>sp|Q03761|TAF12_YEAST Transcription initiation factor TFIID subunit 12 OS=Saccharomyces cerevisiae (strain ATCC 204508 / S288c) GN=TAF12 PE=1 SV=1	1532300	2488400	3872400	9617400	0.402636	0.587137	0.494887	0.149042
_DDMDGQEDS(ph)FNKDTNVVK_3	Q02100	>sp|Q02100|SKO1_YEAST CRE-binding bZIP protein SKO1 OS=Saccharomyces cerevisiae (strain ATCC 204508 / S288c) GN=SKO1 PE=1 SV=1	332730	705730	1234500	1855500	0.569399	0.419822	0.494611	0.038293
_GTVSTSAS(ph)ALQNR_2	P32461	>sp|P32461|DPH2_YEAST Diphthamide biosynthesis protein 2 OS=Saccharomyces cerevisiae (strain ATCC 204508 / S288c) GN=DPH2 PE=1 SV=1	73004	197130	249900	560480	0.53442	0.453807	0.494113	0.105783
_HSS(ph)LGINGSR_2	P40013	>sp|P40013|BIM1_YEAST Protein BIM1 OS=Saccharomyces cerevisiae (strain ATCC 204508 / S288c) GN=BIM1 PE=1 SV=1	610480	1127000	1467800	4553600	0.380995	0.606431	0.493713	0.171962
_RNS(ph)DLDAASIK_2	P14737	>sp|P14737|RAD9_YEAST DNA repair protein RAD9 OS=Saccharomyces cerevisiae (strain ATCC 204508 / S288c) GN=RAD9 PE=1 SV=2	341520	582290	831770	2320800	0.386587	0.600498	0.493543	0.16251
_NS(ph)RVPS(ph)LVATSESPR_3	P38968	>sp|P38968|SEC31_YEAST Protein transport protein SEC31 OS=Saccharomyces cerevisiae (strain ATCC 204508 / S288c) GN=SEC31 PE=1 SV=3	22044	234890	157260	319280	0.853328	0.133307	0.493318	0.0723955
_QDASPDDDRS(ph)GHS(ph)SPR_2	P34164	>sp|P34164|SIP2_YEAST SNF1 protein kinase subunit beta-2 OS=Saccharomyces cerevisiae (strain ATCC 204508 / S288c) GN=SIP2 PE=1 SV=3	19991	53148	53152	193600	0.424685	0.561418	0.493052	0.176198
_LPS(ph)LS(ph)SFQGK_2	P25389	>sp|P25389|KCC4_YEAST Probable serine/threonine-protein kinase KCC4 OS=Saccharomyces cerevisiae (strain ATCC 204508 / S288c) GN=KCC4 PE=1 SV=3	43570	115290	153640	316430	0.547317	0.438486	0.492901	0.0906176
_IIHRS(ph)PS(ph)IDASPPENNSSHNIVPIK_3	Q03612;P0C2I7;P0C2I5;Q12414;P0C2I3;Q12273;P47098;Q03434;P0C2I6;P0C2J1;Q07793;Q04670;Q92393;O13527	>sp|Q03612|YE11B_YEAST Transposon Ty1-ER1 Gag-Pol polyprotein OS=Saccharomyces cerevisiae (strain ATCC 204508 / S288c) GN=TY1B-ER1 PE=3 SV=1;>sp|P0C2I7|YL14B_YEAST Transposon Ty1-LR4 Gag-Pol polyprotein OS=Saccharomyces cerevisiae (strain ATCC 204508 / S28	104450	171250	244130	707750	0.368713	0.616249	0.492481	0.168927
_LKIT(ph)DS(ph)NLENM(ox)EDVEAK_3	Q06315	>sp|Q06315|SKG3_YEAST Protein SKG3 OS=Saccharomyces cerevisiae (strain ATCC 204508 / S288c) GN=SKG3 PE=1 SV=1	24921	211660	53207	957570	0.329403	0.655532	0.492468	0.237935
_RAT(ph)PVS(ph)TPVISKPSM(ox)TTTPR_3	Q03497	>sp|Q03497|STE20_YEAST Serine/threonine-protein kinase STE20 OS=Saccharomyces cerevisiae (strain ATCC 204508 / S288c) GN=STE20 PE=1 SV=1	74850	354190	122870	2082700	0.215254	0.76939	0.492322	0.241159
_VPS(ph)TTGDPSEK_2	P13185	>sp|P13185|KIN1_YEAST Serine/threonine protein kinase KIN1 OS=Saccharomyces cerevisiae (strain ATCC 204508 / S288c) GN=KIN1 PE=1 SV=3	24618	78517	72114	258590	0.466767	0.517648	0.492207	0.167912
_ATTPIAPGVESASQSIS(ph)STPT(ph)PVSTDTPLHTVK_3	Q12514	>sp|Q12514|NOT5_YEAST General negative regulator of transcription subunit 5 OS=Saccharomyces cerevisiae (strain ATCC 204508 / S288c) GN=NOT5 PE=1 SV=1	160380	249750	389140	993020	0.384956	0.599452	0.492204	0.154961
_AAAS(ph)T(ph)LEDIEVKDDEWAVDMSEEAIR_3	P38431	>sp|P38431|IF5_YEAST Eukaryotic translation initiation factor 5 OS=Saccharomyces cerevisiae (strain ATCC 204508 / S288c) GN=TIF5 PE=1 SV=1	79503	34761	311370	85308	0.592893	0.389897	0.491395	0.181677
_LSSES(ph)VIEQIVK_2	P05756	>sp|P05756|RS13_YEAST 40S ribosomal protein S13 OS=Saccharomyces cerevisiae (strain ATCC 204508 / S288c) GN=RPS13 PE=1 SV=3	174770	369370	472040	1312500	0.431512	0.550638	0.491075	0.152808
_GGEDGS(ph)LVSSN_2	Q03435	>sp|Q03435|NHP10_YEAST Non-histone protein 10 OS=Saccharomyces cerevisiae (strain ATCC 204508 / S288c) GN=NHP10 PE=1 SV=1	64028	90276	149550	370810	0.368416	0.613579	0.490998	0.155811
_HLPDADEKIDST(ph)T(ph)TFDQEINGDK_3	P38853	>sp|P38853|KEL1_YEAST Kelch repeat-containing protein 1 OS=Saccharomyces cerevisiae (strain ATCC 204508 / S288c) GN=KEL1 PE=1 SV=1	145380	597640	579120	1438700	0.600264	0.381531	0.490897	0.098442
_(ac)SQDAAIAEQTPVEHLSAVDS(ph)AS(ph)HSVLS(ph)TPS(ph)NK_4	P39004;P39003	>sp|P39004|HXT7_YEAST High-affinity hexose transporter HXT6 OS=Saccharomyces cerevisiae (strain ATCC 204508 / S288c) GN=HXT7 PE=1 SV=1;>sp|P39003|HXT6_YEAST High-affinity hexose transporter HXT6 OS=Saccharomyces cerevisiae (strain ATCC 204508 / S288c) GN=H	216540	506030	534890	1960200	0.392726	0.588124	0.490425	0.181397
_S(ph)RDNS(ph)FR_2	P06634	>sp|P06634|DED1_YEAST ATP-dependent RNA helicase DED1 OS=Saccharomyces cerevisiae (strain ATCC 204508 / S288c) GN=DED1 PE=1 SV=2	18236000	47938000	52314000	159750000	0.457688	0.522761	0.490225	0.155833
_SKS(ph)SGVSSPLLSR_3	P39956	>sp|P39956|RPH1_YEAST DNA damage-responsive transcriptional repressor RPH1 OS=Saccharomyces cerevisiae (strain ATCC 204508 / S288c) GN=RPH1 PE=1 SV=1	14569	28728	33503	119420	0.361654	0.618772	0.490213	0.184487
_AHS(ph)SM(ox)VGFDLPQR_3	P00560	>sp|P00560|PGK_YEAST Phosphoglycerate kinase OS=Saccharomyces cerevisiae (strain ATCC 204508 / S288c) GN=PGK1 PE=1 SV=2	18789	138870	47783	521740	0.40537	0.574846	0.490108	0.225941
_(ac)S(ph)SVNKDTIHVAER_3	P25297	>sp|P25297|PHO84_YEAST Inorganic phosphate transporter PHO84 OS=Saccharomyces cerevisiae (strain ATCC 204508 / S288c) GN=PHO84 PE=1 SV=2	225310	1004700	795620	2717000	0.547925	0.432053	0.489989	0.14766
_S(ph)SGNNLSSANVK_2	P34756	>sp|P34756|FAB1_YEAST 1-phosphatidylinositol 3-phosphate 5-kinase FAB1 OS=Saccharomyces cerevisiae (strain ATCC 204508 / S288c) GN=FAB1 PE=1 SV=3	124970	1555700	863510	2149700	0.839462	0.140452	0.489957	0.0343925
_GTAQAVESTLQS(ph)GTTAATNTATTSHR_3	P39940	>sp|P39940|RSP5_YEAST E3 ubiquitin-protein ligase RSP5 OS=Saccharomyces cerevisiae (strain ATCC 204508 / S288c) GN=RSP5 PE=1 SV=1	96412	185920	220600	775320	0.359474	0.620155	0.489815	0.183898
_(ac)SSSVAST(ph)ENIVENMLHPK_2	P38115	>sp|P38115|ARA1_YEAST D-arabinose dehydrogenase [NAD(P)+] heavy chain OS=Saccharomyces cerevisiae (strain ATCC 204508 / S288c) GN=ARA1 PE=1 SV=1	48003	71539	214450	152740	0.650058	0.32941	0.489734	0.105526
_YS(ph)IQTSSK_2	P15891	>sp|P15891|ABP1_YEAST Actin-binding protein OS=Saccharomyces cerevisiae (strain ATCC 204508 / S288c) GN=ABP1 PE=1 SV=4	98504	493350	420540	1100600	0.630353	0.348474	0.489414	0.0947898
_LNLGS(ph)FNK_2	P09232	>sp|P09232|PRTB_YEAST Cerevisin OS=Saccharomyces cerevisiae (strain ATCC 204508 / S288c) GN=PRB1 PE=1 SV=1	47781	85383	117410	330860	0.39045	0.588273	0.489361	0.162023
_KGS(ph)TS(ph)PEPTK_2	P34223	>sp|P34223|UBX1_YEAST UBX domain-containing protein 1 OS=Saccharomyces cerevisiae (strain ATCC 204508 / S288c) GN=SHP1 PE=1 SV=1	3078400	9399200	10834000	25409000	0.546464	0.431897	0.48918	0.106406
_DGHLSAVSHMSS(ph)SSR_3	P39523	>sp|P39523|YM11_YEAST Uncharacterized protein YMR124W OS=Saccharomyces cerevisiae (strain ATCC 204508 / S288c) GN=YMR124W PE=1 SV=2	67171	61081	199700	194310	0.473196	0.502589	0.487893	0.000838418
_VASS(ph)PIS(ph)PGLHSTQYFR_3	P53599	>sp|P53599|SSK2_YEAST MAP kinase kinase kinase SSK2 OS=Saccharomyces cerevisiae (strain ATCC 204508 / S288c) GN=SSK2 PE=1 SV=1	654690	1323500	1776100	4608000	0.433432	0.541789	0.48761	0.145271
_DISANTTT(ph)SFDETPSTEDEKPK_3	Q06523	>sp|Q06523|YP148_YEAST Uncharacterized protein YPR148C OS=Saccharomyces cerevisiae (strain ATCC 204508 / S288c) GN=YPR148C PE=1 SV=1	1154700	2452400	3127000	8550300	0.432659	0.54239	0.487524	0.150426
_S(ph)GGSTPLDSQTK_2	P53890	>sp|P53890|BNI5_YEAST Bud neck protein 5 OS=Saccharomyces cerevisiae (strain ATCC 204508 / S288c) GN=BNI5 PE=1 SV=1	47823	2525000	638030	1783300	1.1252	-0.151037	0.487084	0.46395
_TTPS(ph)FVAFTDTER_2	P10591	>sp|P10591|HSP71_YEAST Heat shock protein SSA1 OS=Saccharomyces cerevisiae (strain ATCC 204508 / S288c) GN=SSA1 PE=1 SV=4	34311	108030	110500	315940	0.507929	0.46606	0.486995	0.138192
_S(ph)KNEMYDDDELNDLGR_3	Q99271	>sp|Q99271|NAH1_YEAST Na(+)/H(+) antiporter OS=Saccharomyces cerevisiae (strain ATCC 204508 / S288c) GN=NHA1 PE=1 SV=1	181660	569320	946950	1028000	0.717068	0.256637	0.486852	0.0781303
_HS(ph)GFFHSSK_3	P12688	>sp|P12688|YPK1_YEAST Serine/threonine-protein kinase YPK1 OS=Saccharomyces cerevisiae (strain ATCC 204508 / S288c) GN=YPK1 PE=1 SV=2	220070	688870	601090	2371900	0.436379	0.536959	0.486669	0.179133
_AYTSSAQVMPEVPQHEPS(ph)TTQEFNVDELSNELKK_4	Q04947	>sp|Q04947|RTN1_YEAST Reticulon-like protein 1 OS=Saccharomyces cerevisiae (strain ATCC 204508 / S288c) GN=RTN1 PE=1 SV=1	2346000	6966500	10715000	14316000	0.659664	0.312807	0.486236	0.0206167
_TAHFENGST(ph)S(ph)S(ph)QKK_2	Q03834	>sp|Q03834|MSH6_YEAST DNA mismatch repair protein MSH6 OS=Saccharomyces cerevisiae (strain ATCC 204508 / S288c) GN=MSH6 PE=1 SV=1	20857	438150	154250	555470	0.868973	0.103038	0.486006	0.0203787
_TALGNS(ph)PTLK_2	Q05958	>sp|Q05958|ECM22_YEAST Sterol regulatory element-binding protein ECM22 OS=Saccharomyces cerevisiae (strain ATCC 204508 / S288c) GN=ECM22 PE=1 SV=1	67466	123400	160910	484270	0.377498	0.593772	0.485635	0.169348
_(ac)S(ph)HEGEEDLLEYS(ph)DNEQEIQIDASK_3	Q07478	>sp|Q07478|SUB2_YEAST ATP-dependent RNA helicase SUB2 OS=Saccharomyces cerevisiae (strain ATCC 204508 / S288c) GN=SUB2 PE=1 SV=1	4054800	5205300	8900400	22141000	0.34144	0.628751	0.485096	0.161296
_S(ph)AAFQSLSR_2	P48582	>sp|P48582|BRO1_YEAST Vacuolar-sorting protein BRO1 OS=Saccharomyces cerevisiae (strain ATCC 204508 / S288c) GN=BRO1 PE=1 SV=2	21211	91325	108720	166260	0.709748	0.260198	0.484973	0.0245898
_VVQS(ph)VNDATK_2	P34244	>sp|P34244|HSL1_YEAST Probable serine/threonine-protein kinase HSL1 OS=Saccharomyces cerevisiae (strain ATCC 204508 / S288c) GN=HSL1 PE=1 SV=2	78557	335670	341450	719750	0.638142	0.331269	0.484706	0.0589408
_SSYGSNNDDS(ph)YGSNNDDSYGSSNKK_3	P18899	>sp|P18899|DDR48_YEAST Stress protein DDR48 OS=Saccharomyces cerevisiae (strain ATCC 204508 / S288c) GN=DDR48 PE=1 SV=4	83795	95423	241790	307780	0.46022	0.508587	0.484404	0.0463917
_NNS(ph)GSSVS(ph)LQQLAR_2	Q02805	>sp|Q02805|ROD1_YEAST Protein ROD1 OS=Saccharomyces cerevisiae (strain ATCC 204508 / S288c) GN=ROD1 PE=1 SV=1	186030	156520	415770	650720	0.34927	0.618824	0.484047	0.111487
_SRGQS(ph)SVS(ph)LER_2	Q06673	>sp|Q06673|ECM30_YEAST Protein ECM30 OS=Saccharomyces cerevisiae (strain ATCC 204508 / S288c) GN=ECM30 PE=1 SV=1	93112	97136	145350	577270	0.193409	0.773999	0.483704	0.215504
_SVS(ph)NAS(ph)LDTQNT(ph)FEQNVESDKNFNK_3	Q07807	>sp|Q07807|PUF3_YEAST mRNA-binding protein PUF3 OS=Saccharomyces cerevisiae (strain ATCC 204508 / S288c) GN=PUF3 PE=1 SV=1	144110	355480	431330	1101000	0.476116	0.490972	0.483544	0.132946
_(ac)SQDAAIAEQTPVEHLSAVDS(ph)ASHSVLST(ph)PSNK_3	P39004;P39003	>sp|P39004|HXT7_YEAST High-affinity hexose transporter HXT6 OS=Saccharomyces cerevisiae (strain ATCC 204508 / S288c) GN=HXT7 PE=1 SV=1;>sp|P39003|HXT6_YEAST High-affinity hexose transporter HXT6 OS=Saccharomyces cerevisiae (strain ATCC 204508 / S288c) GN=H	296350	42962000	2002600	58814000	0.829789	0.136396	0.483093	0.21587
_SS(ph)SS(ph)TYGSIR_2	Q12301	>sp|Q12301|YD180_YEAST Uncharacterized membrane protein YDL180W OS=Saccharomyces cerevisiae (strain ATCC 204508 / S288c) GN=YDL180W PE=1 SV=1	54144	94805	125290	377930	0.364366	0.60058	0.482473	0.171635
_RST(ph)T(ph)EELNNVM(ox)NNTSK_3	P40563	>sp|P40563|AIM21_YEAST Altered inheritance of mitochondria protein 21 OS=Saccharomyces cerevisiae (strain ATCC 204508 / S288c) GN=AIM21 PE=1 SV=1	47018	373160	93364	1730000	0.297915	0.666151	0.482033	0.239132
_RKS(ph)GVTLYPTK_3	Q12318	>sp|Q12318|PSY3_YEAST Platinum sensitivity protein 3 OS=Saccharomyces cerevisiae (strain ATCC 204508 / S288c) GN=PSY3 PE=1 SV=1	82678	106530	183370	437920	0.345938	0.613923	0.479931	0.156104
_SRS(ph)S(ph)VM(ox)FK_2	P07278	>sp|P07278|KAPR_YEAST cAMP-dependent protein kinase regulatory subunit OS=Saccharomyces cerevisiae (strain ATCC 204508 / S288c) GN=BCY1 PE=1 SV=4	46419	1233800	234820	2223000	0.704039	0.255695	0.479867	0.190093
_TGLNS(ph)S(ph)SSTIDFFK_2	P49956	>sp|P49956|CTF18_YEAST Chromosome transmission fidelity protein 18 OS=Saccharomyces cerevisiae (strain ATCC 204508 / S288c) GN=CTF18 PE=1 SV=1	70011	219360	301220	464500	0.633718	0.325828	0.479773	0.00930644
_NNSTT(ph)SLSSNITGSASISQADLSLLAR_3	P34761	>sp|P34761|WHI3_YEAST Protein WHI3 OS=Saccharomyces cerevisiae (strain ATCC 204508 / S288c) GN=WHI3 PE=1 SV=1	62101	442430	393830	634570	0.80221	0.156635	0.479423	0.0828903
_LIHENIELES(ph)FIEEK_3	Q04279	>sp|Q04279|YMX6_YEAST Uncharacterized protein YMR086W OS=Saccharomyces cerevisiae (strain ATCC 204508 / S288c) GN=YMR086W PE=1 SV=1	29253	113140	131100	229280	0.651432	0.30675	0.479091	0.0208412
_GS(ph)NFQGDGREDAPDLDWGAAR_3	P34167	>sp|P34167|IF4B_YEAST Eukaryotic translation initiation factor 4B OS=Saccharomyces cerevisiae (strain ATCC 204508 / S288c) GN=TIF3 PE=1 SV=1	162250	274830	628540	644210	0.588148	0.369963	0.479056	0.0367492
_NLT(ph)DELAK_2	Q06704	>sp|Q06704|IMH1_YEAST Golgin IMH1 OS=Saccharomyces cerevisiae (strain ATCC 204508 / S288c) GN=IMH1 PE=1 SV=1	43617	61672	98697	247290	0.354648	0.603119	0.478883	0.15818
_(ac)SEYASS(ph)IHS(ph)QM(ox)K_2	Q12402	>sp|Q12402|YOP1_YEAST Protein YOP1 OS=Saccharomyces cerevisiae (strain ATCC 204508 / S288c) GN=YOP1 PE=1 SV=3	149590	1388700	346900	5430000	0.365302	0.592191	0.478747	0.234471
_IAS(ph)PIQHEHDSGSRIAS(ph)PIQQQQQDPTTNLLK_4	P38427	>sp|P38427|TSL1_YEAST Trehalose synthase complex regulatory subunit TSL1 OS=Saccharomyces cerevisiae (strain ATCC 204508 / S288c) GN=TSL1 PE=1 SV=1	585170	591810	1200300	2612800	0.312008	0.644924	0.478466	0.155952
_KS(ph)DVYDLEK_2	P33300	>sp|P33300|SUR1_YEAST Mannosyl phosphorylinositol ceramide synthase SUR1 OS=Saccharomyces cerevisiae (strain ATCC 204508 / S288c) GN=SUR1 PE=1 SV=1	114160	410870	325710	1303700	0.455317	0.501473	0.478395	0.175944
_(ac)S(ph)REGFQIPTNLDAAAAGTSQAR_2	P40422	>sp|P40422|RPAB4_YEAST DNA-directed RNA polymerases I, II, and III subunit RPABC4 OS=Saccharomyces cerevisiae (strain ATCC 204508 / S288c) GN=RPC10 PE=1 SV=1	100900	110720	204410	494620	0.306611	0.650046	0.478328	0.166168
_VAASST(ph)SLR_2	P22137	>sp|P22137|CLH_YEAST Clathrin heavy chain OS=Saccharomyces cerevisiae (strain ATCC 204508 / S288c) GN=CHC1 PE=1 SV=1	16337	58401	46809	184130	0.457157	0.498704	0.477931	0.174313
_KNT(ph)PDVEAK_2	P0CT04	>sp|P0CT04|IPB2_YEAST Protease B inhibitor 2 OS=Saccharomyces cerevisiae (strain ATCC 204508 / S288c) GN=PBI2 PE=1 SV=1	50453	197570	141630	635360	0.448268	0.507299	0.477784	0.184641
_NNS(ph)GS(ph)SVSLQQLAR_2	Q02805	>sp|Q02805|ROD1_YEAST Protein ROD1 OS=Saccharomyces cerevisiae (strain ATCC 204508 / S288c) GN=ROD1 PE=1 SV=1	34277	470800	235310	618470	0.836638	0.118482	0.47756	0.0483369
_GGSITLESGS(ph)YKFQD_2	P32583	>sp|P32583|SRP40_YEAST Suppressor protein SRP40 OS=Saccharomyces cerevisiae (strain ATCC 204508 / S288c) GN=SRP40 PE=1 SV=2	62632	143860	216610	374930	0.538882	0.41601	0.477446	0.0628985
_ESLGLS(ph)SDVLPLEFPGDK_2	Q12434	>sp|Q12434|GDIR_YEAST Rho GDP-dissociation inhibitor OS=Saccharomyces cerevisiae (strain ATCC 204508 / S288c) GN=RDI1 PE=1 SV=1	42597	121910	181460	257870	0.629402	0.325361	0.477382	0.00336223
_TTS(ph)AGS(ph)VLEDTSMHK_2	P53858	>sp|P53858|BNI4_YEAST Protein BNI4 OS=Saccharomyces cerevisiae (strain ATCC 204508 / S288c) GN=BNI4 PE=1 SV=1	203490	350710	769880	834440	0.57788	0.376447	0.477163	0.0250041
_SPNIVTLNIS(ph)R_2	P39956	>sp|P39956|RPH1_YEAST DNA damage-responsive transcriptional repressor RPH1 OS=Saccharomyces cerevisiae (strain ATCC 204508 / S288c) GN=RPH1 PE=1 SV=1	48361	172130	170980	438180	0.54845	0.405796	0.477123	0.112531
_KLS(ph)NSVTSR_2	P47113	>sp|P47113|BFA1_YEAST Mitotic check point protein BFA1 OS=Saccharomyces cerevisiae (strain ATCC 204508 / S288c) GN=BFA1 PE=1 SV=1	57568	350920	244270	742730	0.627689	0.325623	0.476656	0.108454
_S(ph)PSFLSPGPSMATVK_2	P32578	>sp|P32578|SIP1_YEAST SNF1 protein kinase subunit beta-1 OS=Saccharomyces cerevisiae (strain ATCC 204508 / S288c) GN=SIP1 PE=1 SV=2	36256	267280	203300	427280	0.748757	0.203746	0.476252	0.00685482
_NNS(ph)GYYHNSYDNNNNSNNPGSNSHR_4	P24276	>sp|P24276|SSD1_YEAST Protein SSD1 OS=Saccharomyces cerevisiae (strain ATCC 204508 / S288c) GN=SSD1 PE=1 SV=1	203260	595710	722380	1501300	0.550714	0.401433	0.476073	0.0843164
_RSSTNNS(ph)S(ph)VNFS(ph)R_2	REV__P40059	>sp|P40059|DOT6_YEAST Transcriptional regulatory protein DOT6 OS=Saccharomyces cerevisiae (strain ATCC 204508 / S288c) GN=DOT6 PE=1 SV=1	18728	167480	109680	255570	0.767636	0.183547	0.475591	0.00508777
_INNLQDMS(ph)LDS(ph)DAHR_3	P09959	>sp|P09959|SWI6_YEAST Regulatory protein SWI6 OS=Saccharomyces cerevisiae (strain ATCC 204508 / S288c) GN=SWI6 PE=1 SV=1	235500	319250	674480	995420	0.456978	0.493875	0.475427	0.0667097
_RNS(ph)VNIGALCEDVPNTAGPHIAR_3	P40917	>sp|P40917|YAP4_YEAST AP-1-like transcription factor YAP4 OS=Saccharomyces cerevisiae (strain ATCC 204508 / S288c) GN=CIN5 PE=1 SV=1	165440	569730	604670	1391400	0.562878	0.387783	0.47533	0.0937385
_(ac)MPFDVLIS(ph)NQK_2	P25302	>sp|P25302|SWI4_YEAST Regulatory protein SWI4 OS=Saccharomyces cerevisiae (strain ATCC 204508 / S288c) GN=SWI4 PE=1 SV=2	420420	26466	375050	264040	-0.0495942	0.998981	0.474694	0.310065
_PS(ph)DVASR_2	P22696	>sp|P22696|ESS1_YEAST Peptidyl-prolyl cis-trans isomerase ESS1 OS=Saccharomyces cerevisiae (strain ATCC 204508 / S288c) GN=ESS1 PE=1 SV=3	58063	39858	73473	279730	0.102228	0.846224	0.474226	0.229579
_(ac)M(ox)GQLLSHPLT(ph)EK_3	P38089	>sp|P38089|PP2C4_YEAST Protein phosphatase 2C homolog 4 OS=Saccharomyces cerevisiae (strain ATCC 204508 / S288c) GN=PTC4 PE=1 SV=1	36876	83035	79148	343520	0.331696	0.616691	0.474193	0.19879
_NLS(ph)NENCS(ph)FKK_2	P11972	>sp|P11972|SST2_YEAST Protein SST2 OS=Saccharomyces cerevisiae (strain ATCC 204508 / S288c) GN=SST2 PE=1 SV=2	530970	732820	1512900	2283600	0.45474	0.493623	0.474181	0.0703258
_SSELLNSTFYSSTS(ph)INT(ph)LDHAR_3	P53858	>sp|P53858|BNI4_YEAST Protein BNI4 OS=Saccharomyces cerevisiae (strain ATCC 204508 / S288c) GN=BNI4 PE=1 SV=1	163970	360770	450020	1165600	0.438467	0.509319	0.473893	0.1413
_MYS(ph)TSNYSISLVDLENGPK_2	Q06146	>sp|Q06146|YL257_YEAST Uncharacterized protein YLR257W OS=Saccharomyces cerevisiae (strain ATCC 204508 / S288c) GN=YLR257W PE=1 SV=1	94684	171130	248750	577300	0.419486	0.528075	0.473781	0.134598
_LNDAVEY(ph)VSGR_2	P22943	>sp|P22943|HSP12_YEAST 12 kDa heat shock protein OS=Saccharomyces cerevisiae (strain ATCC 204508 / S288c) GN=HSP12 PE=1 SV=1	95541	268810	227890	998040	0.377535	0.569703	0.473619	0.192852
_KHS(ph)ILSSSR_3	P38682	>sp|P38682|GLO3_YEAST ADP-ribosylation factor GTPase-activating protein GLO3 OS=Saccharomyces cerevisiae (strain ATCC 204508 / S288c) GN=GLO3 PE=1 SV=1	144440	131250	215380	778680	0.173518	0.77326	0.473389	0.215261
_TSYIDQYSS(ph)SDSNFNSR_3	P39969	>sp|P39969|BOI2_YEAST Protein BOI2 OS=Saccharomyces cerevisiae (strain ATCC 204508 / S288c) GN=BOI2 PE=1 SV=1	29806	156500	122390	337160	0.613442	0.333322	0.473382	0.0992552
_Y(ph)LS(ph)ET(ph)GLDFLGQLLALDPY(ph)KR_3	P23293	>sp|P23293|BUR1_YEAST Serine/threonine-protein kinase BUR1 OS=Saccharomyces cerevisiae (strain ATCC 204508 / S288c) GN=SGV1 PE=1 SV=1	68090	88167	120350	441230	0.247363	0.699359	0.473361	0.203224
_LNNTAAS(ph)TGPGR_2	P52553	>sp|P52553|PFD6_YEAST Prefoldin subunit 6 OS=Saccharomyces cerevisiae (strain ATCC 204508 / S288c) GN=YKE2 PE=1 SV=1	154580	406030	454620	1218300	0.468495	0.477196	0.472846	0.13737
_VDFSAPPLVPT(ph)NSTTK_3	Q06677	>sp|Q06677|SWA2_YEAST Auxilin-like clathrin uncoating factor SWA2 OS=Saccharomyces cerevisiae (strain ATCC 204508 / S288c) GN=SWA2 PE=1 SV=1	31295	67186	86931	213330	0.4437	0.501773	0.472736	0.134214
_S(ph)LS(ph)GLDLQNQNK_2	P34217	>sp|P34217|PIN4_YEAST RNA-binding protein PIN4 OS=Saccharomyces cerevisiae (strain ATCC 204508 / S288c) GN=PIN4 PE=1 SV=1	265540	3232200	1606000	4706800	0.781616	0.163228	0.472422	0.0151563
_EKS(ph)NS(ph)PTSFFDGSASSTPIPVLGKPTDATGNTTSK_4	P20676	>sp|P20676|NUP1_YEAST Nucleoporin NUP1 OS=Saccharomyces cerevisiae (strain ATCC 204508 / S288c) GN=NUP1 PE=1 SV=1	689390	753150	1514000	3011900	0.341661	0.601959	0.47181	0.138579
_LVSWDILEGET(ph)QHNDSSNES(ph)EEEEEEEWKGF_3	P35178	>sp|P35178|RRP1_YEAST Ribosomal RNA-processing protein 1 OS=Saccharomyces cerevisiae (strain ATCC 204508 / S288c) GN=RRP1 PE=1 SV=2	36320	596820	975140	194060	1.42892	-0.487907	0.470507	0.378998
_KVS(ph)NGGFSTEFNSCDT_2	P32047	>sp|P32047|MLF3_YEAST Protein MLF3 OS=Saccharomyces cerevisiae (strain ATCC 204508 / S288c) GN=MLF3 PE=1 SV=2	141910	407840	498330	1013000	0.545504	0.39512	0.470312	0.0805737
_M(ox)WGGSLSAIPMEIM(ox)EDS(ph)FGFKEK_3	REV__P53978	>sp|P53978|EF3B_YEAST Elongation factor 3B OS=Saccharomyces cerevisiae (strain ATCC 204508 / S288c) GN=HEF3 PE=1 SV=2	57612	62852	74493	423910	0.111603	0.828955	0.470279	0.235128
_SKS(ph)FEENLK_2	P43573	>sp|P43573|BUD27_YEAST Bud site selection protein 27 OS=Saccharomyces cerevisiae (strain ATCC 204508 / S288c) GN=BUD27 PE=1 SV=1	98915	125850	203070	534430	0.312384	0.628038	0.470211	0.170549
_SM(ox)S(ph)VAS(ph)LDQLGK_2	P38814	>sp|P38814|SBE22_YEAST Protein SBE22 OS=Saccharomyces cerevisiae (strain ATCC 204508 / S288c) GN=SBE22 PE=1 SV=1	24435	216620	69655	660870	0.45494	0.484417	0.469679	0.217711
_S(ph)RSDLEAATDEQDRENTNDEPDTNQK_4	P35177	>sp|P35177|SPT7_YEAST Transcriptional activator SPT7 OS=Saccharomyces cerevisiae (strain ATCC 204508 / S288c) GN=SPT7 PE=1 SV=1	124130	427490	377760	1214400	0.483339	0.453436	0.468388	0.150752
_IINDT(ph)LIK_2	P38810	>sp|P38810|SFB3_YEAST SED5-binding protein 3 OS=Saccharomyces cerevisiae (strain ATCC 204508 / S288c) GN=SFB3 PE=1 SV=1	26737	64702	30088	496760	0.0512806	0.885229	0.468255	0.247531
_TSPSPTGPNPNNSPSPS(ph)SPISR_2	P48415	>sp|P48415|SEC16_YEAST COPII coat assembly protein SEC16 OS=Saccharomyces cerevisiae (strain ATCC 204508 / S288c) GN=SEC16 PE=1 SV=2	48459	426990	229470	771730	0.675351	0.257048	0.4662	0.0960978
_VES(ph)GSQQTS(ph)IHS(ph)TPIVQK_3	P23585	>sp|P23585|HXT2_YEAST High-affinity glucose transporter HXT2 OS=Saccharomyces cerevisiae (strain ATCC 204508 / S288c) GN=HXT2 PE=1 SV=1	6891600	11949000	37193000	18933000	0.732141	0.199888	0.466015	0.177894
_NMS(ph)VPNNGPK_2	P47035	>sp|P47035|NET1_YEAST Nucleolar protein NET1 OS=Saccharomyces cerevisiae (strain ATCC 204508 / S288c) GN=NET1 PE=1 SV=1	27822	88652	92379	227400	0.521185	0.409102	0.465143	0.111379
_TIHS(ph)GLDIDKVDETM(ox)DEIR_3	P39929	>sp|P39929|SNF7_YEAST Vacuolar-sorting protein SNF7 OS=Saccharomyces cerevisiae (strain ATCC 204508 / S288c) GN=SNF7 PE=1 SV=1	31098	483480	86148	1485500	0.442513	0.487494	0.465003	0.23253
_RT(ph)ESGS(ph)SFVDLFNR_3	P38041	>sp|P38041|BOB1_YEAST Protein BOB1 OS=Saccharomyces cerevisiae (strain ATCC 204508 / S288c) GN=BOI1 PE=1 SV=1	71140	201860	253950	480690	0.552634	0.376815	0.464725	0.0652769
_LLGS(ph)VSDFTSAADQLR_2	P12954	>sp|P12954|SRS2_YEAST ATP-dependent DNA helicase SRS2 OS=Saccharomyces cerevisiae (strain ATCC 204508 / S288c) GN=SRS2 PE=1 SV=2	87829	225140	250700	670050	0.455516	0.473655	0.464585	0.138297
_SRS(ph)ISPDEK_2	P53968	>sp|P53968|CRZ1_YEAST Transcriptional regulator CRZ1 OS=Saccharomyces cerevisiae (strain ATCC 204508 / S288c) GN=CRZ1 PE=1 SV=1	213510	624180	529910	2132800	0.394784	0.53364	0.464212	0.184195
_KTT(ph)FADE_2	P50106	>sp|P50106|RPA14_YEAST DNA-directed RNA polymerase I subunit RPA14 OS=Saccharomyces cerevisiae (strain ATCC 204508 / S288c) GN=RPA14 PE=1 SV=1	110660	507180	414220	1147800	0.57324	0.354704	0.463972	0.109144
_TSDEDNTISTPNLSSANNTTIGSNGFSSPFLLASGLLS(ph)PGVAR_4	P39969	>sp|P39969|BOI2_YEAST Protein BOI2 OS=Saccharomyces cerevisiae (strain ATCC 204508 / S288c) GN=BOI2 PE=1 SV=1	66453	555040	311760	1001800	0.671306	0.256457	0.463881	0.0901649
_(ac)TTTAQDNS(ph)PK_2	P31688	>sp|P31688|TPS2_YEAST Trehalose-phosphatase OS=Saccharomyces cerevisiae (strain ATCC 204508 / S288c) GN=TPS2 PE=1 SV=3	577080	1344700	1692800	3877200	0.46737	0.459893	0.463631	0.117909
_TKS(ph)FELCEDR_2	Q08979	>sp|Q08979|KEL3_YEAST Kelch repeat-containing protein 3 OS=Saccharomyces cerevisiae (strain ATCC 204508 / S288c) GN=KEL3 PE=1 SV=1	109240	545610	453450	1111000	0.618148	0.308832	0.46349	0.0759272
_GTINPSNSS(ph)VVPVR_2	P12688	>sp|P12688|YPK1_YEAST Serine/threonine-protein kinase YPK1 OS=Saccharomyces cerevisiae (strain ATCC 204508 / S288c) GN=YPK1 PE=1 SV=2	62921	109590	134660	432480	0.330443	0.596195	0.463319	0.180409
_QHSNGS(ph)TIGGETK_2	P22147	>sp|P22147|XRN1_YEAST 5-3 exoribonuclease 1 OS=Saccharomyces cerevisiae (strain ATCC 204508 / S288c) GN=XRN1 PE=1 SV=1	276200	449600	608800	1721900	0.343251	0.583182	0.463216	0.16861
_VAS(ph)NPALNTTK_2	P39955	>sp|P39955|SAP1_YEAST Protein SAP1 OS=Saccharomyces cerevisiae (strain ATCC 204508 / S288c) GN=SAP1 PE=1 SV=1	20446	110590	73999	257920	0.558617	0.367769	0.463193	0.139024
_S(ph)FQNCLEAEVPGYNDCPTVLFSIDPNSGPR_3	Q03233	>sp|Q03233|ADD37_YEAST Alpha1-proteinase inhibitor-degradation deficient protein 37 OS=Saccharomyces cerevisiae (strain ATCC 204508 / S288c) GN=ADD37 PE=1 SV=1	147150	315280	525420	743390	0.552746	0.37252	0.462633	0.0196488
_AADVENLS(ph)DDDEHRQNES(ph)R_3	P25558	>sp|P25558|BUD3_YEAST Bud site selection protein 3 OS=Saccharomyces cerevisiae (strain ATCC 204508 / S288c) GN=BUD3 PE=1 SV=2	65893	387150	313400	684960	0.67726	0.247786	0.462523	0.0292798
_NPSGQS(ph)NRSNIK_3	Q01919	>sp|Q01919|KIN4_YEAST Serine/threonine-protein kinase KIN4 OS=Saccharomyces cerevisiae (strain ATCC 204508 / S288c) GN=KIN4 PE=1 SV=1	45246	280300	280260	380300	0.791981	0.132503	0.462242	0.121944
_NNS(ph)NRPHLAK_3	Q06146	>sp|Q06146|YL257_YEAST Uncharacterized protein YLR257W OS=Saccharomyces cerevisiae (strain ATCC 204508 / S288c) GN=YLR257W PE=1 SV=1	483350	1955200	1223300	6489600	0.403271	0.521027	0.462149	0.19851
_NNS(ph)FEHDNLEK_3	Q12532	>sp|Q12532|TAE2_YEAST Translation-associated element 2 OS=Saccharomyces cerevisiae (strain ATCC 204508 / S288c) GN=TAE2 PE=1 SV=1	59046	218200	178760	605010	0.48108	0.442908	0.461994	0.154462
_(ac)MQS(ph)PYPMTQVSNVDDGSLLK_3	P27705	>sp|P27705|MIG1_YEAST Regulatory protein MIG1 OS=Saccharomyces cerevisiae (strain ATCC 204508 / S288c) GN=MIG1 PE=1 SV=1	35262	128710	201600	188670	0.757184	0.166091	0.461637	0.139874
_SVNHS(ph)SSTLQTDDISVDK_2	P32521	>sp|P32521|PAN1_YEAST Actin cytoskeleton-regulatory complex protein PAN1 OS=Saccharomyces cerevisiae (strain ATCC 204508 / S288c) GN=PAN1 PE=1 SV=2	271580	1073900	768110	3177100	0.451526	0.471067	0.461296	0.176204
_DLS(ph)SEVVGQMDAIK_2	P31539	>sp|P31539|HS104_YEAST Heat shock protein 104 OS=Saccharomyces cerevisiae (strain ATCC 204508 / S288c) GN=HSP104 PE=1 SV=2	319230	383470	915120	1118700	0.457374	0.464982	0.461178	0.0331994
_IFTQTSDS(ph)MDEATK_2	P53303	>sp|P53303|ZPR1_YEAST Zinc finger protein ZPR1 OS=Saccharomyces cerevisiae (strain ATCC 204508 / S288c) GN=ZPR1 PE=1 SV=1	97850	88560	208570	347360	0.328691	0.593542	0.461117	0.121321
_TS(ph)KGGS(ph)LSPTPEAFNDTR_3	P13186	>sp|P13186|KIN2_YEAST Serine/threonine-protein kinase KIN2 OS=Saccharomyces cerevisiae (strain ATCC 204508 / S288c) GN=KIN2 PE=1 SV=3	62023	110570	181120	316510	0.465414	0.45675	0.461082	0.0831045
_S(ph)KLNDAVEYVSGR_2	P22943	>sp|P22943|HSP12_YEAST 12 kDa heat shock protein OS=Saccharomyces cerevisiae (strain ATCC 204508 / S288c) GN=HSP12 PE=1 SV=1	1079700	2507500	2602400	8679800	0.382071	0.539269	0.46067	0.173011
_ITTTES(ph)PTASK_2	P32325	>sp|P32325|DBF4_YEAST DDK kinase regulatory subunit DBF4 OS=Saccharomyces cerevisiae (strain ATCC 204508 / S288c) GN=DBF4 PE=1 SV=2	92756	255510	279840	705800	0.479568	0.441274	0.460421	0.124658
_S(ph)QVFAQHPDK_2	Q02486	>sp|Q02486|ABF2_YEAST ARS-binding factor 2, mitochondrial OS=Saccharomyces cerevisiae (strain ATCC 204508 / S288c) GN=ABF2 PE=1 SV=1	93921	265110	231750	894210	0.392257	0.528013	0.460135	0.181346
_TQIS(ph)FSTDSPDNFQESNDNTEFSSTK_3	Q03661	>sp|Q03661|ESC1_YEAST Silent chromatin protein ESC1 OS=Saccharomyces cerevisiae (strain ATCC 204508 / S288c) GN=ESC1 PE=1 SV=1	260500	491410	725520	1466700	0.444842	0.474897	0.459869	0.108378
_AAS(ph)EPNGLQLASATS(ph)PTSSSAR_3	P53739	>sp|P53739|FPK1_YEAST Flippase kinase 1 OS=Saccharomyces cerevisiae (strain ATCC 204508 / S288c) GN=FPK1 PE=1 SV=1	365290	811080	941390	2606600	0.411132	0.507011	0.459071	0.151172
_IEVGSVEDDDEEDDYNPYSVGNADYGS(ph)EEEEEANPFPLEGK_4	P53064	>sp|P53064|RTF1_YEAST RNA polymerase-associated protein RTF1 OS=Saccharomyces cerevisiae (strain ATCC 204508 / S288c) GN=RTF1 PE=1 SV=2	63155	1801900	519700	1812800	0.915345	0.00261921	0.458982	0.242402
_AIDASIDDFLIPS(ph)PPLS(ph)PK_2	Q99326	>sp|Q99326|YO338_YEAST SWIRM domain-containing protein YOR338W OS=Saccharomyces cerevisiae (strain ATCC 204508 / S288c) GN=YOR338W PE=1 SV=1	28187	89002	53336	389330	0.276972	0.640918	0.458945	0.223407
_KQQPTGDSTPS(ph)GTAT(ph)NSAVS(ph)TPLT(ph)PK_3	P31384	>sp|P31384|CCR4_YEAST Glucose-repressible alcohol dehydrogenase transcriptional effector OS=Saccharomyces cerevisiae (strain ATCC 204508 / S288c) GN=CCR4 PE=1 SV=2	127920	208400	231220	953940	0.257087	0.660623	0.458855	0.206175
_SS(ph)ISNTS(ph)DHDGANR_2	Q03559	>sp|Q03559|YM8V_YEAST Uncharacterized protein YMR295C OS=Saccharomyces cerevisiae (strain ATCC 204508 / S288c) GN=YMR295C PE=1 SV=1	263460	11972000	2563200	10160000	0.988068	-0.071273	0.458397	0.462417
_AHQEESS(ph)EDVGGDMVETLNGQTK_3	P11075	>sp|P11075|SEC7_YEAST Protein transport protein SEC7 OS=Saccharomyces cerevisiae (strain ATCC 204508 / S288c) GN=SEC7 PE=1 SV=2	255280	546890	801020	1438700	0.496627	0.42007	0.458348	0.0751978
_LAGTSS(ph)CIEGEDGSETK_2	P38772	>sp|P38772|BCD1_YEAST Box C/D snoRNA protein 1 OS=Saccharomyces cerevisiae (strain ATCC 204508 / S288c) GN=BCD1 PE=1 SV=1	46943	120870	101200	462110	0.33361	0.582427	0.458018	0.199809
_HFS(ph)ESNK_2	Q12263	>sp|Q12263|GIN4_YEAST Serine/threonine-protein kinase GIN4 OS=Saccharomyces cerevisiae (strain ATCC 204508 / S288c) GN=GIN4 PE=1 SV=1	196570	891190	847820	1702400	0.634786	0.281091	0.457939	0.034678
_NDIGSFS(ph)PEFSK_2	P38345	>sp|P38345|FMP21_YEAST Protein FMP21, mitochondrial OS=Saccharomyces cerevisiae (strain ATCC 204508 / S288c) GN=FMP21 PE=1 SV=2	90106	355060	245820	1071500	0.435864	0.47969	0.457777	0.181877
_(ac)SFFGLENS(ph)GNAR_2	P25644	>sp|P25644|PAT1_YEAST DNA topoisomerase 2-associated protein PAT1 OS=Saccharomyces cerevisiae (strain ATCC 204508 / S288c) GN=PAT1 PE=1 SV=4	202280	281700	490740	952820	0.384899	0.529224	0.457061	0.120784
_LNQT(ph)FESNVGK_2	P00899	>sp|P00899|TRPE_YEAST Anthranilate synthase component 1 OS=Saccharomyces cerevisiae (strain ATCC 204508 / S288c) GN=TRP2 PE=1 SV=4	75730	314680	279340	699490	0.566865	0.346912	0.456889	0.0950881
_LDS(ph)PVS(ph)ENGEIKDGEPIPQNWLNENHVGK_4	P53865	>sp|P53865|CNM67_YEAST Chaotic nuclear migration protein 67 OS=Saccharomyces cerevisiae (strain ATCC 204508 / S288c) GN=CNM67 PE=1 SV=1	1487600	74958	1049200	871320	-0.151628	1.06536	0.456866	0.410183
_VSQES(ph)LHS(ph)QPKK_3	Q04279	>sp|Q04279|YMX6_YEAST Uncharacterized protein YMR086W OS=Saccharomyces cerevisiae (strain ATCC 204508 / S288c) GN=YMR086W PE=1 SV=1	76845	553920	303510	1149300	0.596557	0.316986	0.456772	0.13421
_HS(ph)SLGINGSR_3	P40013	>sp|P40013|BIM1_YEAST Protein BIM1 OS=Saccharomyces cerevisiae (strain ATCC 204508 / S288c) GN=BIM1 PE=1 SV=1	84310	162760	171660	654700	0.30879	0.604495	0.456642	0.194063
_TNFNLLDFSTDNDSST(ph)SAFTK_3	P39996	>sp|P39996|GTT3_YEAST Glutathione transferase 3 OS=Saccharomyces cerevisiae (strain ATCC 204508 / S288c) GN=GTT3 PE=1 SV=1	183450	29868	225140	199180	0.0889349	0.82404	0.456487	0.173151
_EVHTNQDPLDVS(ph)ASKTEECEK_3	P0CX70;P0CX71;P0CX72;P0CX73;Q03612;P0C2I7;P0C2I5;Q12414;P0C2I3;Q12273;P47098;Q03434;P0C2I6;P0C2J1;Q07793	>sp|P0CX70|YD15A_YEAST Transposon Ty1-DR6 Gag polyprotein OS=Saccharomyces cerevisiae (strain ATCC 204508 / S288c) GN=TY1A-DR6 PE=2 SV=1;>sp|P0CX71|YE11A_YEAST Transposon Ty1-ER1 Gag polyprotein OS=Saccharomyces cerevisiae (strain ATCC 204508 / S288c) GN=T	2113500	4643100	3625000	22132000	0.234306	0.678213	0.456259	0.222558
_TNLAPNNTS(ph)T(ph)SSLM(ox)KPESSLYLGNSNK_3	P39719	>sp|P39719|FLC2_YEAST Flavin carrier protein 2 OS=Saccharomyces cerevisiae (strain ATCC 204508 / S288c) GN=FLC2 PE=1 SV=2	84917	930700	201960	3197600	0.376271	0.536014	0.456143	0.23358
_KPAS(ph)KAPAEK_2	P02294;P02293	>sp|P02294|H2B2_YEAST Histone H2B.2 OS=Saccharomyces cerevisiae (strain ATCC 204508 / S288c) GN=HTB2 PE=1 SV=2;>sp|P02293|H2B1_YEAST Histone H2B.1 OS=Saccharomyces cerevisiae (strain ATCC 204508 / S288c) GN=HTB1 PE=1 SV=2	85918	423870	324410	916500	0.57701	0.3349	0.455955	0.106486
_DSMLDS(ph)SLNK_2	P21538	>sp|P21538|REB1_YEAST DNA-binding protein REB1 OS=Saccharomyces cerevisiae (strain ATCC 204508 / S288c) GN=REB1 PE=1 SV=2	93872	120430	278760	330950	0.472694	0.439028	0.455861	0.0206053
_S(ph)ATSINLSSHPVSSR_3	P47072	>sp|P47072|YJB6_YEAST Uncharacterized protein YJL016W OS=Saccharomyces cerevisiae (strain ATCC 204508 / S288c) GN=YJL016W PE=1 SV=2	72458	258730	202980	753220	0.447367	0.464075	0.455721	0.167855
_MS(ph)DLS(ph)LKS(ph)ETPASTK_2	P47116	>sp|P47116|PTK2_YEAST Serine/threonine-protein kinase PTK2/STK2 OS=Saccharomyces cerevisiae (strain ATCC 204508 / S288c) GN=PTK2 PE=1 SV=1	348270	473960	888360	1512400	0.406673	0.503925	0.455299	0.0973399
_ALS(ph)NNIS(ph)QESLVAPAPEQGVPPAISR_3	P38427	>sp|P38427|TSL1_YEAST Trehalose synthase complex regulatory subunit TSL1 OS=Saccharomyces cerevisiae (strain ATCC 204508 / S288c) GN=TSL1 PE=1 SV=1	215190	503230	382800	2298100	0.25015	0.659602	0.454876	0.220361
_(ac)S(ph)ESSDISAMQPVNPK_2	P54999	>sp|P54999|RUXF_YEAST Small nuclear ribonucleoprotein F OS=Saccharomyces cerevisiae (strain ATCC 204508 / S288c) GN=SMX3 PE=1 SV=1	73844	135610	186110	436900	0.401454	0.50809	0.454772	0.136465
_S(ph)YAEQGKEYITDK_2	P22943	>sp|P22943|HSP12_YEAST 12 kDa heat shock protein OS=Saccharomyces cerevisiae (strain ATCC 204508 / S288c) GN=HSP12 PE=1 SV=1	509100	373550	583720	2642200	0.0594015	0.849617	0.454509	0.239534
_IGGTHSGLT(ph)PQSS(ph)ISSDK_2	Q04336	>sp|Q04336|YM54_YEAST Uncharacterized protein YMR196W OS=Saccharomyces cerevisiae (strain ATCC 204508 / S288c) GN=YMR196W PE=1 SV=1	54242	120280	132410	399180	0.387585	0.520975	0.45428	0.163018
_SSILTAS(ph)R_2	P38682	>sp|P38682|GLO3_YEAST ADP-ribosylation factor GTPase-activating protein GLO3 OS=Saccharomyces cerevisiae (strain ATCC 204508 / S288c) GN=GLO3 PE=1 SV=1	40584	79369	79176	329510	0.290239	0.618218	0.454228	0.201275
_YNPLNSSAS(ph)NS(ph)LLNDDDHTSGK_3	Q08236	>sp|Q08236|AVO1_YEAST Target of rapamycin complex 2 subunit AVO1 OS=Saccharomyces cerevisiae (strain ATCC 204508 / S288c) GN=AVO1 PE=1 SV=1	49489	1226400	477730	1026500	0.984674	-0.0772732	0.4537	0.389016
_FLNS(ph)AVLSA_2	P0C5Q5	>sp|P0C5Q5|YM307_YEAST Putative uncharacterized protein YMR307C-A OS=Saccharomyces cerevisiae (strain ATCC 204508 / S288c) GN=YMR307C-A PE=5 SV=1	33257	116120	105060	295350	0.499554	0.40543	0.452492	0.128711
_EVHTNQDPLDVS(ph)ASK_2	P0CX70;P0CX71;P0CX72;P0CX73;Q03612;P0C2I7;P0C2I5;Q12414;P0C2I3;Q12273;P47098;Q03434;P0C2I6;P0C2J1;Q07793;Q04670;Q92393;Q12316;Q12193	>sp|P0CX70|YD15A_YEAST Transposon Ty1-DR6 Gag polyprotein OS=Saccharomyces cerevisiae (strain ATCC 204508 / S288c) GN=TY1A-DR6 PE=2 SV=1;>sp|P0CX71|YE11A_YEAST Transposon Ty1-ER1 Gag polyprotein OS=Saccharomyces cerevisiae (strain ATCC 204508 / S288c) GN=T	17146	672260	193380	478750	1.05225	-0.147428	0.45241	0.485138
_QFS(ph)SSTMIEVTNNNNK_2	Q03088	>sp|Q03088|SVL3_YEAST Styryl dye vacuolar localization protein 3 OS=Saccharomyces cerevisiae (strain ATCC 204508 / S288c) GN=SVL3 PE=1 SV=1	50169	146860	189640	311960	0.577495	0.327195	0.452345	0.0267221
_GS(ph)FKDSLIK_3	P00445	>sp|P00445|SODC_YEAST Superoxide dismutase [Cu-Zn] OS=Saccharomyces cerevisiae (strain ATCC 204508 / S288c) GN=SOD1 PE=1 SV=2	52171	81373	121280	280970	0.36636	0.53818	0.45227	0.1439
_HLS(ph)SVFK_2	P41819	>sp|P41819|DIM1_YEAST Dimethyladenosine transferase OS=Saccharomyces cerevisiae (strain ATCC 204508 / S288c) GN=DIM1 PE=1 SV=1	223610	760040	690830	1973400	0.48988	0.414379	0.452129	0.133001
_TSNYDANGS(ph)SSTIK_2	Q12296	>sp|Q12296|MAM3_YEAST Protein MAM3 OS=Saccharomyces cerevisiae (strain ATCC 204508 / S288c) GN=MAM3 PE=1 SV=1	108210	360390	318220	983020	0.46846	0.43579	0.452125	0.14645
_NDDSSSTTATNSGNDVAS(ph)AR_3	P39960	>sp|P39960|BEM2_YEAST GTPase-activating protein BEM2/IPL2 OS=Saccharomyces cerevisiae (strain ATCC 204508 / S288c) GN=BEM2 PE=1 SV=1	64515	183420	188500	503380	0.465651	0.438449	0.45205	0.132325
_SSS(ph)KM(ox)DLEIK_3	P32364	>sp|P32364|SMY1_YEAST Kinesin-related protein SMY1 OS=Saccharomyces cerevisiae (strain ATCC 204508 / S288c) GN=SMY1 PE=1 SV=1	51794	372460	120270	1285900	0.365878	0.538128	0.452003	0.226182
_TLS(ph)DIENELK_2	Q00402	>sp|Q00402|NUM1_YEAST Nuclear migration protein NUM1 OS=Saccharomyces cerevisiae (strain ATCC 204508 / S288c) GN=NUM1 PE=1 SV=2	147060	271190	394520	810210	0.428574	0.475324	0.451949	0.113003
_FYNSGVSPTDNS(ph)R_2	P38426	>sp|P38426|TPS3_YEAST Trehalose synthase complex regulatory subunit TPS3 OS=Saccharomyces cerevisiae (strain ATCC 204508 / S288c) GN=TPS3 PE=1 SV=3	134110	408940	331910	1322200	0.393559	0.509638	0.451598	0.182107
_(ac)M(ox)ESQQLS(ph)QHSPIS(ph)HGS(ph)ACASVTSK_3	P0CX70;P0CX71;P0CX72;P0CX73;Q03964;Q03612;P0C2I5;Q12414;P0C2I3;Q07793;Q04214;Q04215	>sp|P0CX70|YD15A_YEAST Transposon Ty1-DR6 Gag polyprotein OS=Saccharomyces cerevisiae (strain ATCC 204508 / S288c) GN=TY1A-DR6 PE=2 SV=1;>sp|P0CX71|YE11A_YEAST Transposon Ty1-ER1 Gag polyprotein OS=Saccharomyces cerevisiae (strain ATCC 204508 / S288c) GN=T	34469	1295700	195900	1822000	0.754606	0.148044	0.451325	0.155265
_KETS(ph)TSLADNSK_2	P47134	>sp|P47134|BIR1_YEAST Protein BIR1 OS=Saccharomyces cerevisiae (strain ATCC 204508 / S288c) GN=BIR1 PE=1 SV=1	178070	116030	168380	979890	-0.0243003	0.926607	0.451153	0.25357
_EGFQIPTNLDAAAAGTS(ph)QAR_3	P40422	>sp|P40422|RPAB4_YEAST DNA-directed RNA polymerases I, II, and III subunit RPABC4 OS=Saccharomyces cerevisiae (strain ATCC 204508 / S288c) GN=RPC10 PE=1 SV=1	200670	344250	390660	1410900	0.289316	0.612622	0.450969	0.193892
_GVM(ox)NTSEDLPS(ph)PSK_2	P41832	>sp|P41832|BNI1_YEAST Protein BNI1 OS=Saccharomyces cerevisiae (strain ATCC 204508 / S288c) GN=BNI1 PE=1 SV=3	159670	28477	39100	926850	-0.611047	1.51252	0.450734	0.292466
_YQS(ph)SDLEDTPLMLR_2	P14737	>sp|P14737|RAD9_YEAST DNA repair protein RAD9 OS=Saccharomyces cerevisiae (strain ATCC 204508 / S288c) GN=RAD9 PE=1 SV=2	112880	199680	360690	497650	0.504517	0.396589	0.450553	0.0291724
_ISS(ph)SIEFASLTK_2	P38115	>sp|P38115|ARA1_YEAST D-arabinose dehydrogenase [NAD(P)+] heavy chain OS=Saccharomyces cerevisiae (strain ATCC 204508 / S288c) GN=ARA1 PE=1 SV=1	203580	697490	622980	1815100	0.485739	0.415363	0.450551	0.135726
_EIS(ph)S(ph)PLQENCK_2	P33301	>sp|P33301|XRS2_YEAST DNA repair protein XRS2 OS=Saccharomyces cerevisiae (strain ATCC 204508 / S288c) GN=XRS2 PE=1 SV=1	97621	98312	164510	463740	0.226649	0.673668	0.450159	0.192374
_FGSLINDQGTAGLSS(ph)HGGS(ph)FAAQNR_3	P22211	>sp|P22211|NPR1_YEAST Nitrogen permease reactivator protein OS=Saccharomyces cerevisiae (strain ATCC 204508 / S288c) GN=NPR1 PE=1 SV=2	231710	692030	816290	1560000	0.5469	0.353	0.44995	0.0613313
_ASYVGDS(ph)SQVEDPGAVGLCEFLK_3	P54838	>sp|P54838|DAK1_YEAST Dihydroxyacetone kinase 1 OS=Saccharomyces cerevisiae (strain ATCC 204508 / S288c) GN=DAK1 PE=1 SV=1	475800	809530	1249700	2446100	0.419381	0.480241	0.449811	0.109397
_S(ph)QSLTSS(ph)VANNAPQSVR_2	P34216	>sp|P34216|EDE1_YEAST EH domain-containing and endocytosis protein 1 OS=Saccharomyces cerevisiae (strain ATCC 204508 / S288c) GN=EDE1 PE=1 SV=2	144620	612650	1447800	484400	1.00048	-0.102008	0.449236	0.281225
_LAS(ph)SGEVDKIESPR_2	P23201	>sp|P23201|SPA2_YEAST Protein SPA2 OS=Saccharomyces cerevisiae (strain ATCC 204508 / S288c) GN=SPA2 PE=1 SV=1	54695	235010	126890	800690	0.36548	0.532378	0.448929	0.209594
_STS(ph)NLAS(ph)PMSSK_2	Q12271	>sp|Q12271|INP53_YEAST Polyphosphatidylinositol phosphatase INP53 OS=Saccharomyces cerevisiae (strain ATCC 204508 / S288c) GN=INP53 PE=1 SV=1	190930	202490	562350	542430	0.469133	0.42794	0.448536	0.0140771
_LGSSPS(ph)FLTQK_2	Q12494	>sp|Q12494|KCS1_YEAST Inositol hexakisphosphate kinase 1 OS=Saccharomyces cerevisiae (strain ATCC 204508 / S288c) GN=KCS1 PE=1 SV=1	111460	574420	396060	1275100	0.550642	0.346315	0.448478	0.12719
_DDNVRPS(ph)PIS(ph)PSINPPK_3	P37370	>sp|P37370|VRP1_YEAST Verprolin OS=Saccharomyces cerevisiae (strain ATCC 204508 / S288c) GN=VRP1 PE=1 SV=2	421710	799710	945680	2810200	0.35073	0.545805	0.448268	0.168848
_APNTPSTSDEPSS(ph)SSSSDLYSTPHYQR_3	P53094	>sp|P53094|MDS3_YEAST Negative regulator of sporulation MDS3 OS=Saccharomyces cerevisiae (strain ATCC 204508 / S288c) GN=MDS3 PE=1 SV=2	80888	134660	128290	668300	0.200309	0.695733	0.448021	0.221799
_T(ph)LM(ox)SVFNM(ox)ISNGAFGS(ph)GS(ph)FSKR_3	Q12207	>sp|Q12207|NCE2_YEAST Non-classical export protein 2 OS=Saccharomyces cerevisiae (strain ATCC 204508 / S288c) GN=NCE102 PE=1 SV=1	257220	1068200	474930	4553700	0.266325	0.629712	0.448018	0.230144
_EDNAS(ph)SLSVPTDSIHSTEYEEEDSDAPVKLR_3	REV__P06779	>sp|P06779|RAD7_YEAST DNA repair protein RAD7 OS=Saccharomyces cerevisiae (strain ATCC 204508 / S288c) GN=RAD7 PE=1 SV=3	247860	5276300	2031600	5056100	0.913632	-0.0185138	0.447559	0.289097
_LAELAENVS(ph)GDGKR_3	Q12136	>sp|Q12136|SAS10_YEAST Something about silencing protein 10 OS=Saccharomyces cerevisiae (strain ATCC 204508 / S288c) GN=SAS10 PE=1 SV=1	136170	256150	301110	909050	0.344644	0.550093	0.447369	0.171234
_MSS(ph)SSGGDSISR_2	Q9P305	>sp|Q9P305|IGO2_YEAST mRNA stability protein IGO2 OS=Saccharomyces cerevisiae (strain ATCC 204508 / S288c) GN=IGO2 PE=1 SV=3	346270	442180	932930	1286800	0.430434	0.463912	0.447173	0.0567597
_MTDPHLNTPQVSTS(ph)PTFER_3	P43598	>sp|P43598|IGD1_YEAST Inhibitor of glycogen debranching 1 OS=Saccharomyces cerevisiae (strain ATCC 204508 / S288c) GN=IGD1 PE=1 SV=1	45299	60735	88233	242560	0.289542	0.60138	0.445461	0.17619
_EKS(ph)NS(ph)PTSFFDGSASSTPIPVLGKPTDATGNTTSK_3	P20676	>sp|P20676|NUP1_YEAST Nucleoporin NUP1 OS=Saccharomyces cerevisiae (strain ATCC 204508 / S288c) GN=NUP1 PE=1 SV=1	264740	271050	531640	1046500	0.302798	0.58669	0.444744	0.144484
_GRVS(ph)PRPNLLPTTS(ph)FSAAQEETEDSALR_3	Q04958	>sp|Q04958|NTE1_YEAST Lysophospholipase NTE1 OS=Saccharomyces cerevisiae (strain ATCC 204508 / S288c) GN=NTE1 PE=1 SV=1	217180	750640	846380	1493200	0.590746	0.298686	0.444716	0.026245
_KSS(ph)DIDQVNNAEDPSR_2	Q06440	>sp|Q06440|CORO_YEAST Coronin-like protein OS=Saccharomyces cerevisiae (strain ATCC 204508 / S288c) GN=CRN1 PE=1 SV=1	1497600	4078300	3250800	14546000	0.336594	0.552264	0.444429	0.197178
_QDASPDDDRS(ph)GHS(ph)SPR_3	P34164	>sp|P34164|SIP2_YEAST SNF1 protein kinase subunit beta-2 OS=Saccharomyces cerevisiae (strain ATCC 204508 / S288c) GN=SIP2 PE=1 SV=3	172030	504930	491530	1366900	0.455946	0.432506	0.444226	0.137012
_GSKS(ph)PLQER_2	P32873	>sp|P32873|BEM3_YEAST GTPase-activating protein BEM3 OS=Saccharomyces cerevisiae (strain ATCC 204508 / S288c) GN=BEM3 PE=1 SV=3	269020	499760	456000	2279400	0.22918	0.659059	0.44412	0.216679
_ADDM(ox)PVVQADNQTS(ph)SSK_2	Q04602	>sp|Q04602|VBA4_YEAST Vacuolar basic amino acid transporter 4 OS=Saccharomyces cerevisiae (strain ATCC 204508 / S288c) GN=VBA4 PE=1 SV=1	67950	102640	58007	928140	-0.0687091	0.956297	0.443794	0.253834
_(ac)S(ph)FENKLPTPLENNDAK_3	Q04170	>sp|Q04170|YD391_YEAST Uncharacterized protein YDR391C OS=Saccharomyces cerevisiae (strain ATCC 204508 / S288c) GN=YDR391C PE=1 SV=1	77326	37995	119190	190280	0.187914	0.699667	0.44379	0.164604
_DTEESLGHDSAS(ph)ASS(ph)ASR_2	Q07541	>sp|Q07541|YD121_YEAST Uncharacterized protein YDL121C OS=Saccharomyces cerevisiae (strain ATCC 204508 / S288c) GN=YDL121C PE=1 SV=1	19992	53652	51663	158670	0.412323	0.470909	0.441616	0.156766
_S(ph)SYSMAYDSPVDR_2	P38165	>sp|P38165|RTG3_YEAST Retrograde regulation protein 3 OS=Saccharomyces cerevisiae (strain ATCC 204508 / S288c) GN=RTG3 PE=1 SV=2	84210	263300	397080	426730	0.673514	0.209702	0.441608	0.0967741
_DAM(ox)M(ox)S(ph)APGSR_2	P06634	>sp|P06634|DED1_YEAST ATP-dependent RNA helicase DED1 OS=Saccharomyces cerevisiae (strain ATCC 204508 / S288c) GN=DED1 PE=1 SV=2	235180	837830	318140	4728300	0.131218	0.751549	0.441384	0.243213
_ARPSAGDEDS(ph)AHPDK_3	P13574	>sp|P13574|STE12_YEAST Protein STE12 OS=Saccharomyces cerevisiae (strain ATCC 204508 / S288c) GN=STE12 PE=1 SV=1	52121	519720	337230	612970	0.810913	0.0716698	0.441292	0.149382
_(ac)S(ph)SVNKDTIHVAER_2	P25297	>sp|P25297|PHO84_YEAST Inorganic phosphate transporter PHO84 OS=Saccharomyces cerevisiae (strain ATCC 204508 / S288c) GN=PHO84 PE=1 SV=2	126190	490630	373690	1264000	0.471487	0.410993	0.44124	0.15141
_T(ph)ASVADPILDAVQEAQPFEQAADTFHDNM(ox)NR_3	Q03559	>sp|Q03559|YM8V_YEAST Uncharacterized protein YMR295C OS=Saccharomyces cerevisiae (strain ATCC 204508 / S288c) GN=YMR295C PE=1 SV=1	76923	585930	188520	1822600	0.389301	0.492846	0.441073	0.221353
_(ac)TTTAQDNS(ph)PKK_2	P31688	>sp|P31688|TPS2_YEAST Trehalose-phosphatase OS=Saccharomyces cerevisiae (strain ATCC 204508 / S288c) GN=TPS2 PE=1 SV=3	56709	215310	191510	485970	0.528539	0.353545	0.441042	0.102914
_KVS(ph)GFKDEVLETV_2	P23248	>sp|P23248|RS3A2_YEAST 40S ribosomal protein S1-B OS=Saccharomyces cerevisiae (strain ATCC 204508 / S288c) GN=RPS1B PE=1 SV=3	657150	1093000	1483500	3683500	0.353623	0.527641	0.440632	0.151709
_DASMLDVSDAAS(ph)NTTINGK_2	Q04739	>sp|Q04739|GAL83_YEAST SNF1 protein kinase subunit beta-3 OS=Saccharomyces cerevisiae (strain ATCC 204508 / S288c) GN=GAL83 PE=1 SV=1	1155200	80527	491210	1438400	-0.37139	1.25194	0.440274	0.394768
_RPLET(ph)ETENSFDGDKQVLANR_3	P53255	>sp|P53255|DRN1_YEAST CWF19-like protein DRN1 OS=Saccharomyces cerevisiae (strain ATCC 204508 / S288c) GN=DRN1 PE=1 SV=1	316530	596010	763480	1876800	0.382383	0.498164	0.440274	0.143127
_TWS(ph)SSLDNLEK_2	P39720	>sp|P39720|OAF1_YEAST Oleate-activated transcription factor 1 OS=Saccharomyces cerevisiae (strain ATCC 204508 / S288c) GN=OAF1 PE=1 SV=3	55549	120040	269640	187750	0.686108	0.194254	0.440181	0.152497
_TIEQTSVNS(ph)NNSINKPVQK_3	P13185	>sp|P13185|KIN1_YEAST Serine/threonine protein kinase KIN1 OS=Saccharomyces cerevisiae (strain ATCC 204508 / S288c) GN=KIN1 PE=1 SV=3	238340	1936200	1312600	2667100	0.740935	0.139089	0.440012	0.0598311
_EGS(ph)FVGYEDPVR_2	P35845	>sp|P35845|OSH1_YEAST Oxysterol-binding protein homolog 1 OS=Saccharomyces cerevisiae (strain ATCC 204508 / S288c) GN=SWH1 PE=1 SV=4	100480	153620	205480	569200	0.31069	0.568817	0.439754	0.171225
_IS(ph)SMPGGYFHSEISPDSTVNR_3	P39705	>sp|P39705|NUP60_YEAST Nucleoporin NUP60 OS=Saccharomyces cerevisiae (strain ATCC 204508 / S288c) GN=NUP60 PE=1 SV=1	29970	55910	65091	194990	0.336834	0.542523	0.439679	0.171265
_KDNQIY(ph)AIEK_3	P38879	>sp|P38879|NACA_YEAST Nascent polypeptide-associated complex subunit alpha OS=Saccharomyces cerevisiae (strain ATCC 204508 / S288c) GN=EGD2 PE=1 SV=3	67768	82059	116560	360480	0.235525	0.642755	0.43914	0.194778
_VRNS(ph)DLEDDESLKK_3	Q03661	>sp|Q03661|ESC1_YEAST Silent chromatin protein ESC1 OS=Saccharomyces cerevisiae (strain ATCC 204508 / S288c) GN=ESC1 PE=1 SV=1	1500200	2317000	3427600	7631000	0.358841	0.517655	0.438248	0.139245
_LFS(ph)TGGSTLQHK_3	P37370	>sp|P37370|VRP1_YEAST Verprolin OS=Saccharomyces cerevisiae (strain ATCC 204508 / S288c) GN=VRP1 PE=1 SV=2	86651	327160	285690	746600	0.518121	0.358328	0.438225	0.108967
_HDNLS(ph)S(ph)SSSDIIYGR_3	P47818	>sp|P47818|CCC1_YEAST Protein CCC1 OS=Saccharomyces cerevisiae (strain ATCC 204508 / S288c) GN=CCC1 PE=1 SV=1	205180	81997	107270	1178100	-0.281657	1.15738	0.437864	0.278358
_LKS(ph)GLFNK_2	P42073	>sp|P42073|REF2_YEAST RNA end formation protein 2 OS=Saccharomyces cerevisiae (strain ATCC 204508 / S288c) GN=REF2 PE=1 SV=2	62645	342580	237450	678670	0.578686	0.296897	0.437791	0.0973358
_FGSGNS(ph)FSSLDKPIPQSR_3	P48415	>sp|P48415|SEC16_YEAST COPII coat assembly protein SEC16 OS=Saccharomyces cerevisiae (strain ATCC 204508 / S288c) GN=SEC16 PE=1 SV=2	991530	2202600	2684300	6103800	0.432525	0.442665	0.437595	0.119686
_QTNS(ph)STS(ph)LTK_2	P34226	>sp|P34226|SKT5_YEAST Protein SKT5 OS=Saccharomyces cerevisiae (strain ATCC 204508 / S288c) GN=SKT5 PE=1 SV=1	1097100	3054200	2879200	8724900	0.419026	0.455863	0.437444	0.153077
_SNFM(ox)DDSADDTLYQSNS(ph)LTSADR_3	P25369	>sp|P25369|LSB5_YEAST LAS seventeen-binding protein 5 OS=Saccharomyces cerevisiae (strain ATCC 204508 / S288c) GN=LSB5 PE=1 SV=3	50334	378010	97206	1467300	0.285832	0.589016	0.437424	0.236312
_SYTNT(ph)TKPK_3	P0CX70;P0CX71;P0CX72;P0CX73;Q03612;P0C2I7;P0C2I5;Q12414;P0C2I3;Q12273;P47098;Q03434;P0C2I6;P0C2J1;Q07793;Q04670;Q92393;Q12316;Q12193	>sp|P0CX70|YD15A_YEAST Transposon Ty1-DR6 Gag polyprotein OS=Saccharomyces cerevisiae (strain ATCC 204508 / S288c) GN=TY1A-DR6 PE=2 SV=1;>sp|P0CX71|YE11A_YEAST Transposon Ty1-ER1 Gag polyprotein OS=Saccharomyces cerevisiae (strain ATCC 204508 / S288c) GN=T	85540	524750	447380	751810	0.718507	0.156156	0.437331	0.0716173
_ARLS(ph)M(ox)FNQDITEQVPLPK_3	P47068	>sp|P47068|BBC1_YEAST Myosin tail region-interacting protein MTI1 OS=Saccharomyces cerevisiae (strain ATCC 204508 / S288c) GN=BBC1 PE=1 SV=2	59331	833220	225750	1640700	0.580346	0.294269	0.437308	0.185303
_S(ph)TPVPVSGEYQQR_2	P13186	>sp|P13186|KIN2_YEAST Serine/threonine-protein kinase KIN2 OS=Saccharomyces cerevisiae (strain ATCC 204508 / S288c) GN=KIN2 PE=1 SV=3	115690	375020	315660	1029100	0.435924	0.438403	0.437163	0.155557
_GGS(ph)GWGSDSK_2	P06634	>sp|P06634|DED1_YEAST ATP-dependent RNA helicase DED1 OS=Saccharomyces cerevisiae (strain ATCC 204508 / S288c) GN=DED1 PE=1 SV=2	54137	42152	142840	119550	0.421356	0.452731	0.437044	0.0216311
_VQENDVGPTIPISAT(ph)IRE_2	P38623	>sp|P38623|RCK2_YEAST Serine/threonine-protein kinase RCK2 OS=Saccharomyces cerevisiae (strain ATCC 204508 / S288c) GN=RCK2 PE=1 SV=3	145080	243160	360920	730990	0.395803	0.478019	0.436911	0.117406
_GKDS(ph)IINS(ph)PVSGR_2	P36024	>sp|P36024|SIS2_YEAST Phosphopantothenoylcysteine decarboxylase subunit SIS2 OS=Saccharomyces cerevisiae (strain ATCC 204508 / S288c) GN=SIS2 PE=1 SV=1	58990	236680	177660	586690	0.478811	0.394247	0.436529	0.145949
_VKS(ph)FKQPSK_3	P40157	>sp|P40157|VID27_YEAST Vacuolar import and degradation protein 27 OS=Saccharomyces cerevisiae (strain ATCC 204508 / S288c) GN=VID27 PE=1 SV=1	232080	346040	531220	1128600	0.359637	0.513414	0.436525	0.133779
_VPAPLNLS(ph)DSNTNTHGGNIK_3	Q03063	>sp|Q03063|DIG1_YEAST Down-regulator of invasive growth 1 OS=Saccharomyces cerevisiae (strain ATCC 204508 / S288c) GN=DIG1 PE=1 SV=1	199890	602900	467540	1920800	0.369028	0.503237	0.436132	0.186222
_FQT(ph)SFSDYLLNTTK_2	P25623	>sp|P25623|SYP1_YEAST Suppressor of yeast profilin deletion OS=Saccharomyces cerevisiae (strain ATCC 204508 / S288c) GN=SYP1 PE=1 SV=3	109590	208820	211890	804100	0.28634	0.585538	0.435939	0.195827
_FNNS(ph)NNS(ph)IPR_2	Q03088	>sp|Q03088|SVL3_YEAST Styryl dye vacuolar localization protein 3 OS=Saccharomyces cerevisiae (strain ATCC 204508 / S288c) GN=SVL3 PE=1 SV=1	38699	153310	97338	453350	0.400583	0.470863	0.435723	0.188565
_DNDDTS(ph)VAS(ph)SIDLDHLSR_3	Q00402	>sp|Q00402|NUM1_YEAST Nuclear migration protein NUM1 OS=Saccharomyces cerevisiae (strain ATCC 204508 / S288c) GN=NUM1 PE=1 SV=2	250060	494710	265480	3455400	0.0259876	0.844148	0.435068	0.248342
_TNS(ph)ATLPS(ph)SESSPASPDLKLS(ph)R_3	P32047	>sp|P32047|MLF3_YEAST Protein MLF3 OS=Saccharomyces cerevisiae (strain ATCC 204508 / S288c) GN=MLF3 PE=1 SV=2	193320	59168	295950	286560	0.184942	0.685129	0.435035	0.115048
_YFDSVRS(ph)T(ph)PVAEK_3	P53316	>sp|P53316|YG5B_YEAST Uncharacterized RNA-binding protein YGR250C OS=Saccharomyces cerevisiae (strain ATCC 204508 / S288c) GN=YGR250C PE=1 SV=1	84927	170890	146130	735090	0.235694	0.633624	0.434659	0.215605
_HFIQGGS(ph)FGNREEFINK_3	P05737;Q12213	>sp|P05737|RL7A_YEAST 60S ribosomal protein L7-A OS=Saccharomyces cerevisiae (strain ATCC 204508 / S288c) GN=RPL7A PE=1 SV=3;>sp|Q12213|RL7B_YEAST 60S ribosomal protein L7-B OS=Saccharomyces cerevisiae (strain ATCC 204508 / S288c) GN=RPL7B PE=1 SV=3	562060	984800	1600900	2558700	0.454582	0.414671	0.434626	0.0642973
_NFSAPNVSSS(ph)SNS(ph)LR_2	P47116	>sp|P47116|PTK2_YEAST Serine/threonine-protein kinase PTK2/STK2 OS=Saccharomyces cerevisiae (strain ATCC 204508 / S288c) GN=PTK2 PE=1 SV=1	424680	7692400	3151300	7667200	0.870428	-0.00142507	0.434501	0.252942
_VLLDS(ph)KDVQQIDYK_3	P48164;P26786	>sp|P48164|RS7B_YEAST 40S ribosomal protein S7-B OS=Saccharomyces cerevisiae (strain ATCC 204508 / S288c) GN=RPS7B PE=1 SV=1;>sp|P26786|RS7A_YEAST 40S ribosomal protein S7-A OS=Saccharomyces cerevisiae (strain ATCC 204508 / S288c) GN=RPS7A PE=1 SV=4	82520	238700	238600	610540	0.461111	0.407862	0.434486	0.123499
_AYTSSAQVMPEVPQHEPS(ph)TTQEFNVDELSNELK_4	Q04947	>sp|Q04947|RTN1_YEAST Reticulon-like protein 1 OS=Saccharomyces cerevisiae (strain ATCC 204508 / S288c) GN=RTN1 PE=1 SV=1	374900	1119500	1141600	2716000	0.483599	0.384906	0.434252	0.107488
_ILFNASVINGDNQS(ph)MIS(ph)TR_3	P38713	>sp|P38713|OSH3_YEAST Oxysterol-binding protein homolog 3 OS=Saccharomyces cerevisiae (strain ATCC 204508 / S288c) GN=OSH3 PE=1 SV=1	47988	126730	231170	194270	0.682799	0.185526	0.434163	0.13756
_ILDADPLS(ph)KEDTSEK_3	P46669	>sp|P46669|RPA43_YEAST DNA-directed RNA polymerase I subunit RPA43 OS=Saccharomyces cerevisiae (strain ATCC 204508 / S288c) GN=RPA43 PE=1 SV=2	52216	198380	127950	597680	0.389237	0.478971	0.434104	0.190336
_S(ph)SSTGTGSAMSGGLATR_3	P40013	>sp|P40013|BIM1_YEAST Protein BIM1 OS=Saccharomyces cerevisiae (strain ATCC 204508 / S288c) GN=BIM1 PE=1 SV=1	58511	80679	155530	224000	0.424577	0.443488	0.434032	0.0605809
_(ac)SQDAAIAEQTPVEHLSAVDSAS(ph)HSVLSTPSNK_3	P39004;P39003	>sp|P39004|HXT7_YEAST High-affinity hexose transporter HXT6 OS=Saccharomyces cerevisiae (strain ATCC 204508 / S288c) GN=HXT7 PE=1 SV=1;>sp|P39003|HXT6_YEAST High-affinity hexose transporter HXT6 OS=Saccharomyces cerevisiae (strain ATCC 204508 / S288c) GN=H	306550	371470	4031400	208310	1.11895	-0.251214	0.43387	0.263934
_ADS(ph)GDTSSIHS(ph)SANNTK_3	Q06385	>sp|Q06385|VPS74_YEAST Vacuolar protein sorting-associated protein 74 OS=Saccharomyces cerevisiae (strain ATCC 204508 / S288c) GN=VPS74 PE=1 SV=1	267830	374530	744440	993200	0.44397	0.42355	0.43376	0.0410562
_RNS(ph)VNIGALCEDVPNTAGPHIAR_4	P40917	>sp|P40917|YAP4_YEAST AP-1-like transcription factor YAP4 OS=Saccharomyces cerevisiae (strain ATCC 204508 / S288c) GN=CIN5 PE=1 SV=1	95997	277290	310300	631840	0.509524	0.357673	0.433599	0.0769428
_LLNSPES(ph)DGS(ph)VNRNHS(ph)K_3	P40476	>sp|P40476|PRM5_YEAST Pheromone-regulated membrane protein 5 OS=Saccharomyces cerevisiae (strain ATCC 204508 / S288c) GN=PRM5 PE=1 SV=1	21593	68333	72150	150540	0.523923	0.343021	0.433472	0.0744924
_NVS(ph)CYRPR_2	P0CX37;P0CX38	>sp|P0CX37|RS6A_YEAST 40S ribosomal protein S6-A OS=Saccharomyces cerevisiae (strain ATCC 204508 / S288c) GN=RPS6A PE=1 SV=1;>sp|P0CX38|RS6B_YEAST 40S ribosomal protein S6-B OS=Saccharomyces cerevisiae (strain ATCC 204508 / S288c) GN=RPS6B PE=1 SV=1	236710	541700	501840	1879500	0.326349	0.540283	0.433316	0.187723
_DNS(ph)DVERVEEDAGK_3	P36165	>sp|P36165|TGL4_YEAST Lipase 4 OS=Saccharomyces cerevisiae (strain ATCC 204508 / S288c) GN=TGL4 PE=1 SV=1	32081	73231	85219	202710	0.424289	0.44218	0.433234	0.126038
_SRASQS(ph)S(ph)DS(ph)ESIEVPTAILK_3	Q07878	>sp|Q07878|VPS13_YEAST Vacuolar protein sorting-associated protein 13 OS=Saccharomyces cerevisiae (strain ATCC 204508 / S288c) GN=VPS13 PE=1 SV=1	606720	158170	733680	961320	0.0825184	0.783744	0.433131	0.200095
_NQS(ph)SLGLIPVASATSNTSSPK_3	P53947	>sp|P53947|YNF8_YEAST Vacuolar membrane protein YNL058C OS=Saccharomyces cerevisiae (strain ATCC 204508 / S288c) GN=YNL058C PE=1 SV=1	70237	1779400	706840	1298500	1.00276	-0.136832	0.432962	0.455933
_GSS(ph)DS(ph)FNLPHQISR_3	P47135	>sp|P47135|JSN1_YEAST Protein JSN1 OS=Saccharomyces cerevisiae (strain ATCC 204508 / S288c) GN=JSN1 PE=1 SV=1	268300	1486800	1009600	2897100	0.575529	0.289711	0.43262	0.0959562
_(ac)S(ph)SSITDEKIS(ph)GEQQQPAGR_2	P36035	>sp|P36035|JEN1_YEAST Carboxylic acid transporter protein homolog OS=Saccharomyces cerevisiae (strain ATCC 204508 / S288c) GN=JEN1 PE=1 SV=1	47543	78284	68344	398810	0.157614	0.707093	0.432353	0.229372
_KQT(ph)ASPLSSSTEEPK_3	P38845	>sp|P38845|CRP1_YEAST Cruciform DNA-recognizing protein 1 OS=Saccharomyces cerevisiae (strain ATCC 204508 / S288c) GN=CRP1 PE=1 SV=1	378560	57981	226330	709150	-0.223393	1.08745	0.43203	0.323101
_QHVS(ph)S(ph)TASITSGGHNDLVQIEQPQK_4	P11938	>sp|P11938|RAP1_YEAST DNA-binding protein RAP1 OS=Saccharomyces cerevisiae (strain ATCC 204508 / S288c) GN=RAP1 PE=1 SV=2	71343	166390	229590	377940	0.507602	0.356296	0.431949	0.0455677
_ENYTFESHPGT(ph)PVSSSLMTQRPGAESSLK_3	Q12265	>sp|Q12265|KPR5_YEAST Ribose-phosphate pyrophosphokinase 5 OS=Saccharomyces cerevisiae (strain ATCC 204508 / S288c) GN=PRS5 PE=1 SV=1	267790	578610	578510	1955800	0.334517	0.528939	0.431728	0.179366
_KNT(ph)S(ph)VKLVSQDSASPLSLTFR_3	P53250	>sp|P53250|TWF1_YEAST Twinfilin-1 OS=Saccharomyces cerevisiae (strain ATCC 204508 / S288c) GN=TWF1 PE=1 SV=1	177190	48586	205880	305180	0.065175	0.798045	0.43161	0.214557
_TAIEGS(ph)YIDK_2	P0CX47;P0CX48	>sp|P0CX47|RS11A_YEAST 40S ribosomal protein S11-A OS=Saccharomyces cerevisiae (strain ATCC 204508 / S288c) GN=RPS11A PE=1 SV=1;>sp|P0CX48|RS11B_YEAST 40S ribosomal protein S11-B OS=Saccharomyces cerevisiae (strain ATCC 204508 / S288c) GN=RPS11B PE=1 SV=1	33361	108490	101130	260370	0.481641	0.380201	0.430921	0.116408
_LPFFLQLS(ph)GEK_2	Q06078	>sp|Q06078|UTP21_YEAST U3 small nucleolar RNA-associated protein 21 OS=Saccharomyces cerevisiae (strain ATCC 204508 / S288c) GN=UTP21 PE=1 SV=1	66524	238940	228120	505070	0.535185	0.325063	0.430124	0.0762977
_EALAS(ph)LK_2	Q06706	>sp|Q06706|ELP1_YEAST Elongator complex protein 1 OS=Saccharomyces cerevisiae (strain ATCC 204508 / S288c) GN=IKI3 PE=1 SV=1	41999	92788	113970	247540	0.433552	0.426154	0.429853	0.111434
_QVANGPYLNSYYAS(ph)RR_2	Q06639	>sp|Q06639|RSC3_YEAST Chromatin structure-remodeling complex protein RSC3 OS=Saccharomyces cerevisiae (strain ATCC 204508 / S288c) GN=RSC3 PE=1 SV=1	239640	93867	300180	542460	0.0978224	0.761855	0.429839	0.2073
_LGPQSM(ox)S(ph)R_2	P09032	>sp|P09032|EI2BG_YEAST Translation initiation factor eIF-2B subunit gamma OS=Saccharomyces cerevisiae (strain ATCC 204508 / S288c) GN=GCD1 PE=1 SV=3	248320	2164400	563730	6896800	0.356059	0.50331	0.429685	0.228816
_ENYT(ph)FESHPGT(ph)PVSSSLM(ox)TQRPGAESSLK_4	Q12265	>sp|Q12265|KPR5_YEAST Ribose-phosphate pyrophosphokinase 5 OS=Saccharomyces cerevisiae (strain ATCC 204508 / S288c) GN=PRS5 PE=1 SV=1	214900	2245700	525600	6641300	0.388419	0.470901	0.42966	0.227538
_TPS(ph)DASIS(ph)DQSR_2	P38853	>sp|P38853|KEL1_YEAST Kelch repeat-containing protein 1 OS=Saccharomyces cerevisiae (strain ATCC 204508 / S288c) GN=KEL1 PE=1 SV=1	198560	33135	147010	323400	-0.130545	0.989453	0.429454	0.305947
_AS(ph)LPIIDDSLSYDLVNK_2	P33748	>sp|P33748|MSN2_YEAST Zinc finger protein MSN2 OS=Saccharomyces cerevisiae (strain ATCC 204508 / S288c) GN=MSN2 PE=1 SV=1	59232	336310	255710	562540	0.635191	0.223414	0.429302	0.0223671
_NAS(ph)GITQEK_2	Q05506	>sp|Q05506|SYRC_YEAST Arginine--tRNA ligase, cytoplasmic OS=Saccharomyces cerevisiae (strain ATCC 204508 / S288c) GN=YDR341C PE=1 SV=1	76763	106290	118580	496590	0.18886	0.669506	0.429183	0.216026
_FASS(ph)SPISEGFR_2	P32634	>sp|P32634|PMD1_YEAST Negative regulator of sporulation PMD1 OS=Saccharomyces cerevisiae (strain ATCC 204508 / S288c) GN=PMD1 PE=1 SV=1	26594	398830	160840	475870	0.78161	0.0767005	0.429155	0.084165
_(ac)SSSITDEKIS(ph)GEQQQPAGR_3	P36035	>sp|P36035|JEN1_YEAST Carboxylic acid transporter protein homolog OS=Saccharomyces cerevisiae (strain ATCC 204508 / S288c) GN=JEN1 PE=1 SV=1	63841	252830	120220	967380	0.274877	0.582768	0.428823	0.224937
_FLDGIYVS(ph)HK_3	P05738;P51401	>sp|P05738|RL9A_YEAST 60S ribosomal protein L9-A OS=Saccharomyces cerevisiae (strain ATCC 204508 / S288c) GN=RPL9A PE=1 SV=2;>sp|P51401|RL9B_YEAST 60S ribosomal protein L9-B OS=Saccharomyces cerevisiae (strain ATCC 204508 / S288c) GN=RPL9B PE=1 SV=1	22000	28658	35630	127220	0.209393	0.64731	0.428351	0.206259
_(ac)SQDAAIAEQT(ph)PVEHLS(ph)AVDS(ph)AS(ph)HSVLSTPS(ph)NKAERDEIK_4	P39004;P39003	>sp|P39004|HXT7_YEAST High-affinity hexose transporter HXT6 OS=Saccharomyces cerevisiae (strain ATCC 204508 / S288c) GN=HXT7 PE=1 SV=1;>sp|P39003|HXT6_YEAST High-affinity hexose transporter HXT6 OS=Saccharomyces cerevisiae (strain ATCC 204508 / S288c) GN=H	373030	1154600	1120600	2761200	0.477707	0.378666	0.428187	0.111372
_NSS(ph)SLDS(ph)DHDAYYSK_2	P53388	>sp|P53388|DIP5_YEAST Dicarboxylic amino acid permease OS=Saccharomyces cerevisiae (strain ATCC 204508 / S288c) GN=DIP5 PE=1 SV=1	99473	171250	200990	608810	0.305469	0.550851	0.42816	0.177434
_ETLSSGLS(ph)GIFGR_2	Q02866	>sp|Q02866|MUK1_YEAST Protein MUK1 OS=Saccharomyces cerevisiae (strain ATCC 204508 / S288c) GN=MUK1 PE=1 SV=1	54881	157140	180160	343840	0.516236	0.34007	0.428153	0.0618761
_SKDVTDS(ph)ATTKK_3	P39015	>sp|P39015|STM1_YEAST Suppressor protein STM1 OS=Saccharomyces cerevisiae (strain ATCC 204508 / S288c) GN=STM1 PE=1 SV=3	407350	832750	1025900	2373300	0.401137	0.454838	0.427988	0.128466
_S(ph)QS(ph)LSEITPGPHSR_3	P35845	>sp|P35845|OSH1_YEAST Oxysterol-binding protein homolog 1 OS=Saccharomyces cerevisiae (strain ATCC 204508 / S288c) GN=SWH1 PE=1 SV=4	62069	133720	165530	359400	0.426002	0.429382	0.427692	0.113174
_IIVAGS(ph)QTGTTHTINEEER_2	P32599	>sp|P32599|FIMB_YEAST Fimbrin OS=Saccharomyces cerevisiae (strain ATCC 204508 / S288c) GN=SAC6 PE=1 SV=1	27280	138750	93976	288670	0.537173	0.318169	0.427671	0.11676
_DSDS(ph)ISLK_2	P29539	>sp|P29539|RIF1_YEAST Telomere length regulator protein RIF1 OS=Saccharomyces cerevisiae (strain ATCC 204508 / S288c) GN=RIF1 PE=1 SV=3	38754	95195	87393	302510	0.35316	0.502126	0.427643	0.176647
_RNPTT(ph)GEDVYCICK_3	Q03012	>sp|Q03012|SPP1_YEAST COMPASS component SPP1 OS=Saccharomyces cerevisiae (strain ATCC 204508 / S288c) GN=SPP1 PE=1 SV=1	33933	121490	114150	258570	0.526854	0.328038	0.427446	0.0814696
_HLS(ph)DNQSTK_2	Q08229	>sp|Q08229|NBA1_YEAST Protein NBA1 OS=Saccharomyces cerevisiae (strain ATCC 204508 / S288c) GN=NBA1 PE=1 SV=1	240660	625610	442210	2436800	0.264225	0.590516	0.42737	0.214723
_S(ph)LETDLEQR_2	REV__P25644	>sp|P25644|PAT1_YEAST DNA topoisomerase 2-associated protein PAT1 OS=Saccharomyces cerevisiae (strain ATCC 204508 / S288c) GN=PAT1 PE=1 SV=4	526120	113860	300690	1425800	-0.242966	1.09769	0.427361	0.304166
_(ac)M(ox)ESQQLSQHS(ph)PIS(ph)HGSACASVTSK_3	P0CX70;P0CX71;P0CX72;P0CX73;Q03964;Q03612;P0C2I5;Q12414;P0C2I3;Q07793;Q04214;Q04215	>sp|P0CX70|YD15A_YEAST Transposon Ty1-DR6 Gag polyprotein OS=Saccharomyces cerevisiae (strain ATCC 204508 / S288c) GN=TY1A-DR6 PE=2 SV=1;>sp|P0CX71|YE11A_YEAST Transposon Ty1-ER1 Gag polyprotein OS=Saccharomyces cerevisiae (strain ATCC 204508 / S288c) GN=T	137040	1973900	265530	7289600	0.287266	0.567379	0.427322	0.242307
_APS(ph)SVSMVS(ph)PPPLHK_3	P38968	>sp|P38968|SEC31_YEAST Protein transport protein SEC31 OS=Saccharomyces cerevisiae (strain ATCC 204508 / S288c) GN=SEC31 PE=1 SV=3	83392	111360	186100	356930	0.348622	0.505854	0.427238	0.123907
_TTS(ph)PDIR_2	Q08109	>sp|Q08109|HRD1_YEAST ERAD-associated E3 ubiquitin-protein ligase HRD1 OS=Saccharomyces cerevisiae (strain ATCC 204508 / S288c) GN=HRD1 PE=1 SV=1	143440	2873900	862420	3414600	0.779049	0.0748682	0.426958	0.0447525
_S(ph)TPSSGNNHIDSLSVDR_3	P19524	>sp|P19524|MYO2_YEAST Myosin-2 OS=Saccharomyces cerevisiae (strain ATCC 204508 / S288c) GN=MYO2 PE=1 SV=1	34998	672740	264630	635160	0.878596	-0.0249641	0.426816	0.301635
_MS(ph)SDS(ph)SLCGLASLANEYSK_3	P34756	>sp|P34756|FAB1_YEAST 1-phosphatidylinositol 3-phosphate 5-kinase FAB1 OS=Saccharomyces cerevisiae (strain ATCC 204508 / S288c) GN=FAB1 PE=1 SV=3	27594	34505	71474	95045	0.413333	0.440047	0.42669	0.0503612
_NSDNVNSLNSS(ph)PK_2	P19158	>sp|P19158|IRA2_YEAST Inhibitory regulator protein IRA2 OS=Saccharomyces cerevisiae (strain ATCC 204508 / S288c) GN=IRA2 PE=1 SV=2	24764	831640	233280	629810	0.974057	-0.120726	0.426665	0.494814
_NLS(ph)DLENYSQR_3	Q03661	>sp|Q03661|ESC1_YEAST Silent chromatin protein ESC1 OS=Saccharomyces cerevisiae (strain ATCC 204508 / S288c) GN=ESC1 PE=1 SV=1	54314	90107	126850	274260	0.368379	0.483404	0.425891	0.130561
_RNS(ph)S(ph)ILSFFSSK_2	P38041	>sp|P38041|BOB1_YEAST Protein BOB1 OS=Saccharomyces cerevisiae (strain ATCC 204508 / S288c) GN=BOI1 PE=1 SV=1	367020	816390	1144500	1859100	0.493926	0.357405	0.425666	0.0460585
_SS(ph)DS(ph)SS(ph)EDEVKVEGPK_2	P32499	>sp|P32499|NUP2_YEAST Nucleoporin NUP2 OS=Saccharomyces cerevisiae (strain ATCC 204508 / S288c) GN=NUP2 PE=1 SV=2	66899	307100	102160	1426800	0.183861	0.667083	0.425472	0.239979
_(ac)S(ph)EQKEDLFKPVGEAAAEVEDESIAEQNK_3	P53303	>sp|P53303|ZPR1_YEAST Zinc finger protein ZPR1 OS=Saccharomyces cerevisiae (strain ATCC 204508 / S288c) GN=ZPR1 PE=1 SV=1	396490	771610	824400	2628700	0.317906	0.532343	0.425124	0.177913
_NKQENINS(ph)SSNLFPEGK_3	P25558	>sp|P25558|BUD3_YEAST Bud site selection protein 3 OS=Saccharomyces cerevisiae (strain ATCC 204508 / S288c) GN=BUD3 PE=1 SV=2	62301	274250	192700	627230	0.490387	0.35928	0.424833	0.137359
_GS(ph)FDDDEDDYYDDDDYYNDIPSSFSSTDASSTRPNTR_3	P43603	>sp|P43603|LSB3_YEAST LAS seventeen-binding protein 3 OS=Saccharomyces cerevisiae (strain ATCC 204508 / S288c) GN=LSB3 PE=1 SV=3	478830	724400	1112300	2204400	0.366041	0.483312	0.424676	0.121267
_DVTDS(ph)ATTKK_2	P39015	>sp|P39015|STM1_YEAST Suppressor protein STM1 OS=Saccharomyces cerevisiae (strain ATCC 204508 / S288c) GN=STM1 PE=1 SV=3	48591	134980	153450	301900	0.499411	0.349594	0.424502	0.0714611
_TKS(ph)NTIPVTSIPSTNKK_3	P19659	>sp|P19659|MED15_YEAST Mediator of RNA polymerase II transcription subunit 15 OS=Saccharomyces cerevisiae (strain ATCC 204508 / S288c) GN=GAL11 PE=1 SV=3	137980	239470	245020	950920	0.249385	0.598893	0.424139	0.202466
_FMS(ph)FSDMVR_2	P34223	>sp|P34223|UBX1_YEAST UBX domain-containing protein 1 OS=Saccharomyces cerevisiae (strain ATCC 204508 / S288c) GN=SHP1 PE=1 SV=1	827100	1010300	2834900	2076900	0.53498	0.312965	0.423972	0.0945639
_LPPLPT(ph)TSNSNFNSR_2	P53901	>sp|P53901|INN1_YEAST Ingression protein 1 OS=Saccharomyces cerevisiae (strain ATCC 204508 / S288c) GN=INN1 PE=1 SV=1	68457	136500	135260	486660	0.295752	0.552093	0.423922	0.189994
_FDVGALM(ox)ALHGEGS(ph)GEEK_3	P33442;P23248	>sp|P33442|RS3A1_YEAST 40S ribosomal protein S1-A OS=Saccharomyces cerevisiae (strain ATCC 204508 / S288c) GN=RPS1A PE=1 SV=2;>sp|P23248|RS3A2_YEAST 40S ribosomal protein S1-B OS=Saccharomyces cerevisiae (strain ATCC 204508 / S288c) GN=RPS1B PE=1 SV=3	33762	529470	91213	1380300	0.431629	0.416132	0.42388	0.228539
_MQDLLT(ph)SLEQEKDLR_3	P53251	>sp|P53251|SLX9_YEAST Ribosome biogenesis protein SLX9 OS=Saccharomyces cerevisiae (strain ATCC 204508 / S288c) GN=SLX9 PE=1 SV=1	83410	755240	507260	870670	0.784012	0.0617686	0.422891	0.165365
_LETHVS(ph)TEEK_3	P48415	>sp|P48415|SEC16_YEAST COPII coat assembly protein SEC16 OS=Saccharomyces cerevisiae (strain ATCC 204508 / S288c) GN=SEC16 PE=1 SV=2	71424	218710	249520	438130	0.543261	0.301734	0.422498	0.0329717
_NETSKPVFSFGAAT(ph)PSAK_3	P32499	>sp|P32499|NUP2_YEAST Nucleoporin NUP2 OS=Saccharomyces cerevisiae (strain ATCC 204508 / S288c) GN=NUP2 PE=1 SV=2	81603	409930	243670	959330	0.475096	0.369258	0.422177	0.158692
_LVS(ph)QNNLTEGVTFAK_2	Q00362	>sp|Q00362|2ABA_YEAST Protein phosphatase PP2A regulatory subunit B OS=Saccharomyces cerevisiae (strain ATCC 204508 / S288c) GN=CDC55 PE=1 SV=2	83172	234580	265320	513770	0.503793	0.340478	0.422135	0.0659941
_LGS(ph)TIDAADEVVEDNTSQSQR_2	P34223	>sp|P34223|UBX1_YEAST UBX domain-containing protein 1 OS=Saccharomyces cerevisiae (strain ATCC 204508 / S288c) GN=SHP1 PE=1 SV=1	763600	1693500	1781800	5070200	0.367993	0.47624	0.422116	0.156778
_PPASTSTTNDM(ox)ITEEPTS(ph)PHQIPR_3	P06738	>sp|P06738|PHSG_YEAST Glycogen phosphorylase OS=Saccharomyces cerevisiae (strain ATCC 204508 / S288c) GN=GPH1 PE=1 SV=4	1179600	8719700	1677100	42838000	0.152824	0.691328	0.422076	0.245359
_KNDS(ph)DVPELATIPAAK_2	P48570	>sp|P48570|HOSC_YEAST Homocitrate synthase, cytosolic isozyme OS=Saccharomyces cerevisiae (strain ATCC 204508 / S288c) GN=LYS20 PE=1 SV=1	58009	143920	148220	393380	0.407411	0.436691	0.422051	0.139549
_EALS(ph)LER_2	Q04217	>sp|Q04217|DHR1_YEAST Probable ATP-dependent RNA helicase DHR1 OS=Saccharomyces cerevisiae (strain ATCC 204508 / S288c) GN=ECM16 PE=1 SV=1	24977	56255	50462	194230	0.305424	0.538155	0.42179	0.191861
_MNVAYHS(ph)TNELS(ph)NDASNFFLEEQQQGQR_4	P38080	>sp|P38080|AKL1_YEAST Serine/threonine-protein kinase AKL1 OS=Saccharomyces cerevisiae (strain ATCC 204508 / S288c) GN=AKL1 PE=1 SV=1	111360	219210	325900	521930	0.466355	0.376752	0.421554	0.0537473
_YFDS(ph)VRST(ph)PVAEK_3	P53316	>sp|P53316|YG5B_YEAST Uncharacterized RNA-binding protein YGR250C OS=Saccharomyces cerevisiae (strain ATCC 204508 / S288c) GN=YGR250C PE=1 SV=1	72836	182460	173090	533350	0.375926	0.465845	0.420885	0.161415
_TKS(ph)SVALATAQR_3	P53883	>sp|P53883|NOP13_YEAST Nucleolar protein 13 OS=Saccharomyces cerevisiae (strain ATCC 204508 / S288c) GN=NOP13 PE=1 SV=2	1075800	4425300	3872700	8521700	0.556282	0.284584	0.420433	0.0593106
_SAVIT(ph)PVSK_2	P38426	>sp|P38426|TPS3_YEAST Trehalose synthase complex regulatory subunit TPS3 OS=Saccharomyces cerevisiae (strain ATCC 204508 / S288c) GN=TPS3 PE=1 SV=3	30400	130480	92480	296520	0.483174	0.35651	0.419842	0.136111
_AHNVSTSNNSPSTDNDS(ph)ISK_2	P0CX70;P0CX71;P0CX72;P0CX73;Q03612;P0C2I7;P0C2I5;Q12414;P0C2I3;Q12273;P47098;Q03434;P0C2I6;P0C2J1;Q07793;Q04670;Q92393;Q12316;Q12193	>sp|P0CX70|YD15A_YEAST Transposon Ty1-DR6 Gag polyprotein OS=Saccharomyces cerevisiae (strain ATCC 204508 / S288c) GN=TY1A-DR6 PE=2 SV=1;>sp|P0CX71|YE11A_YEAST Transposon Ty1-ER1 Gag polyprotein OS=Saccharomyces cerevisiae (strain ATCC 204508 / S288c) GN=T	39688	5708300	955310	1639100	1.38149	-0.541901	0.419792	0.32045
_VQESRPGS(ph)VR_2	P20485	>sp|P20485|KICH_YEAST Choline kinase OS=Saccharomyces cerevisiae (strain ATCC 204508 / S288c) GN=CKI1 PE=1 SV=1	241110	371610	379540	1630200	0.197042	0.642153	0.419598	0.21513
_AVNTGMEPGKT(ph)SFFQALGVPTK_3	P05317	>sp|P05317|RLA0_YEAST 60S acidic ribosomal protein P0 OS=Saccharomyces cerevisiae (strain ATCC 204508 / S288c) GN=RPP0 PE=1 SV=2	48707	101870	173680	196740	0.552158	0.285846	0.419002	0.0433166
_RGT(ph)DDGSFSTYAHDLDDK_3	P32634	>sp|P32634|PMD1_YEAST Negative regulator of sporulation PMD1 OS=Saccharomyces cerevisiae (strain ATCC 204508 / S288c) GN=PMD1 PE=1 SV=1	14593	343950	116540	296510	0.90233	-0.064456	0.418937	0.388636
_DAMMS(ph)APGS(ph)R_2	P06634	>sp|P06634|DED1_YEAST ATP-dependent RNA helicase DED1 OS=Saccharomyces cerevisiae (strain ATCC 204508 / S288c) GN=DED1 PE=1 SV=2	3176500	7017600	14183000	10774000	0.649819	0.186188	0.418004	0.14531
_NRS(ph)S(ph)SILFQR_3	P32047	>sp|P32047|MLF3_YEAST Protein MLF3 OS=Saccharomyces cerevisiae (strain ATCC 204508 / S288c) GN=MLF3 PE=1 SV=2	62971	223760	245870	390560	0.591565	0.241905	0.416735	0.0146436
_DAPPASKDS(ph)FITTR_3	P39935	>sp|P39935|IF4F1_YEAST Eukaryotic initiation factor 4F subunit p150 OS=Saccharomyces cerevisiae (strain ATCC 204508 / S288c) GN=TIF4631 PE=1 SV=2	647970	1912200	1589400	5307600	0.389678	0.443365	0.416522	0.163906
_KEDIVSNINESKDANS(ph)S(ph)DEEFAQSLEAEMNK_4	P54000	>sp|P54000|SUB1_YEAST RNA polymerase II transcriptional coactivator SUB1 OS=Saccharomyces cerevisiae (strain ATCC 204508 / S288c) GN=SUB1 PE=1 SV=1	177490	225070	502600	540720	0.452049	0.380655	0.416352	0.0046991
_S(ph)SSTGTGSAM(ox)SGGLATR_2	P40013	>sp|P40013|BIM1_YEAST Protein BIM1 OS=Saccharomyces cerevisiae (strain ATCC 204508 / S288c) GN=BIM1 PE=1 SV=1	70484	720650	111520	3094100	0.199262	0.63281	0.416036	0.244497
_RS(ph)T(ph)TEELNNVM(ox)NNTSK_3	P40563	>sp|P40563|AIM21_YEAST Altered inheritance of mitochondria protein 21 OS=Saccharomyces cerevisiae (strain ATCC 204508 / S288c) GN=AIM21 PE=1 SV=1	90605	336390	122040	1691300	0.12935	0.701378	0.415364	0.242616
_KFLDGIYVS(ph)HK_3	P05738;P51401	>sp|P05738|RL9A_YEAST 60S ribosomal protein L9-A OS=Saccharomyces cerevisiae (strain ATCC 204508 / S288c) GN=RPL9A PE=1 SV=2;>sp|P51401|RL9B_YEAST 60S ribosomal protein L9-B OS=Saccharomyces cerevisiae (strain ATCC 204508 / S288c) GN=RPL9B PE=1 SV=1	34139	63844	84426	174700	0.393225	0.437173	0.415199	0.114443
_KGS(ph)MADVPK_3	P04806;P04807	>sp|P04806|HXKA_YEAST Hexokinase-1 OS=Saccharomyces cerevisiae (strain ATCC 204508 / S288c) GN=HXK1 PE=1 SV=2;>sp|P04807|HXKB_YEAST Hexokinase-2 OS=Saccharomyces cerevisiae (strain ATCC 204508 / S288c) GN=HXK2 PE=1 SV=4	1160100	2546300	3459600	5771500	0.47453	0.355379	0.414955	0.052844
_RGET(ph)FAS(ph)LANDKK_3	P53550	>sp|P53550|DCP2_YEAST mRNA-decapping enzyme subunit 2 OS=Saccharomyces cerevisiae (strain ATCC 204508 / S288c) GN=DCP2 PE=1 SV=1	598470	3348900	3202300	4220900	0.72842	0.100503	0.414461	0.147138
_QLAHEEHINNDGDNDDENSNNIES(ph)SPLK_4	P35734	>sp|P35734|ASK1_YEAST DASH complex subunit ASK1 OS=Saccharomyces cerevisiae (strain ATCC 204508 / S288c) GN=ASK1 PE=1 SV=2	248380	1314400	856880	2567900	0.537803	0.290851	0.414327	0.106145
_IASPIQHEHDS(ph)GSR_3	P38427	>sp|P38427|TSL1_YEAST Trehalose synthase complex regulatory subunit TSL1 OS=Saccharomyces cerevisiae (strain ATCC 204508 / S288c) GN=TSL1 PE=1 SV=1	872980	4133100	2402100	10121000	0.439587	0.388948	0.414267	0.170415
_TKS(ph)SVALATAQR_2	P53883	>sp|P53883|NOP13_YEAST Nucleolar protein 13 OS=Saccharomyces cerevisiae (strain ATCC 204508 / S288c) GN=NOP13 PE=1 SV=2	1578700	8061700	5596700	15319000	0.549632	0.278804	0.414218	0.0890495
_KEES(ph)SNEVVPK_2	Q04636	>sp|Q04636|POB3_YEAST FACT complex subunit POB3 OS=Saccharomyces cerevisiae (strain ATCC 204508 / S288c) GN=POB3 PE=1 SV=1	347860	410230	501510	1916400	0.158875	0.669459	0.414167	0.21764
_DS(ph)YVGDEAQSK_2	P60010;CON__P60712	>sp|P60010|ACT_YEAST Actin OS=Saccharomyces cerevisiae (strain ATCC 204508 / S288c) GN=ACT1 PE=1 SV=1;>P60712 SWISS-PROT:P60712 (Bos taurus) Actin, cytoplasmic 1	25257	91357	72480	214200	0.457836	0.370078	0.413957	0.13318
_T(ph)S(ph)VESEIGGNQVGLK_3	P34250	>sp|P34250|YKK5_YEAST Uncharacterized protein YKL105C OS=Saccharomyces cerevisiae (strain ATCC 204508 / S288c) GN=YKL105C PE=1 SV=1	25686	84051	85285	170030	0.521176	0.305983	0.413579	0.0570613
_KNFS(ph)SYDDIVK_2	P20457	>sp|P20457|PRI2_YEAST DNA primase large subunit OS=Saccharomyces cerevisiae (strain ATCC 204508 / S288c) GN=PRI2 PE=1 SV=1	196810	243030	387940	826630	0.294717	0.531651	0.413184	0.149257
_AS(ph)YVGDSSQVEDPGAVGLCEFLK_3	P54838	>sp|P54838|DAK1_YEAST Dihydroxyacetone kinase 1 OS=Saccharomyces cerevisiae (strain ATCC 204508 / S288c) GN=DAK1 PE=1 SV=1	497470	789740	940290	2800700	0.276495	0.549782	0.413139	0.181008
_TKNESPAFEESPLT(ph)PNVSNLKPFPSQSNK_4	Q06144	>sp|Q06144|ORM2_YEAST Protein ORM2 OS=Saccharomyces cerevisiae (strain ATCC 204508 / S288c) GN=ORM2 PE=1 SV=1	265120	2136000	1092100	3470800	0.61482	0.210828	0.412824	0.0734421
_APS(ph)AASSVDNSK_2	P32831	>sp|P32831|NGR1_YEAST Negative growth regulatory protein NGR1 OS=Saccharomyces cerevisiae (strain ATCC 204508 / S288c) GN=NGR1 PE=1 SV=2	56501	115700	136980	319240	0.384601	0.440784	0.412692	0.130146
_KIAS(ph)IFN_2	Q08245	>sp|Q08245|ZEO1_YEAST Protein ZEO1 OS=Saccharomyces cerevisiae (strain ATCC 204508 / S288c) GN=ZEO1 PE=1 SV=3	145120	400960	449300	866100	0.490809	0.334467	0.412638	0.065651
_NSTSS(ph)PNSTGSDAK_2	P40485	>sp|P40485|SLM1_YEAST Phosphatidylinositol 4,5-bisphosphate-binding protein SLM1 OS=Saccharomyces cerevisiae (strain ATCC 204508 / S288c) GN=SLM1 PE=1 SV=1	299130	55168	286690	384950	-0.0184474	0.843717	0.412635	0.262002
_TIEQTSVNS(ph)NNS(ph)INKPVQK_3	P13185	>sp|P13185|KIN1_YEAST Serine/threonine protein kinase KIN1 OS=Saccharomyces cerevisiae (strain ATCC 204508 / S288c) GN=KIN1 PE=1 SV=3	1755200	2180900	3070300	8335900	0.242854	0.582317	0.412585	0.182996
_S(ph)DSGTVLGAIPLNSR_2	Q08422	>sp|Q08422|YO052_YEAST AN1-type zinc finger protein YOR052C OS=Saccharomyces cerevisiae (strain ATCC 204508 / S288c) GN=YOR052C PE=1 SV=1	2725200	4950700	6308900	14295000	0.364555	0.460518	0.412536	0.13343
_GS(ph)SWDEEEQDYEMVPR_2	Q07896	>sp|Q07896|NOC3_YEAST Nucleolar complex-associated protein 3 OS=Saccharomyces cerevisiae (strain ATCC 204508 / S288c) GN=NOC3 PE=1 SV=1	496530	513270	1928100	882030	0.589184	0.235137	0.412161	0.169751
_SDS(ph)ASTAHVR_2	P39104	>sp|P39104|PIK1_YEAST Phosphatidylinositol 4-kinase PIK1 OS=Saccharomyces cerevisiae (strain ATCC 204508 / S288c) GN=PIK1 PE=1 SV=1	155450	1215900	804860	1567000	0.71413	0.110171	0.41215	0.0922354
_KS(ph)APSTGGVK_2	P61830	>sp|P61830|H3_YEAST Histone H3 OS=Saccharomyces cerevisiae (strain ATCC 204508 / S288c) GN=HHT1 PE=1 SV=2	23166	211410	116610	280150	0.701885	0.122265	0.412075	0.0481154
_NTESNVS(ph)QEATK_2	P07276	>sp|P07276|RAD2_YEAST DNA repair protein RAD2 OS=Saccharomyces cerevisiae (strain ATCC 204508 / S288c) GN=RAD2 PE=1 SV=2	134520	367540	219310	1499300	0.212272	0.610584	0.411428	0.226197
_LDT(ph)NLEDVTDITK_2	P08678	>sp|P08678|CYAA_YEAST Adenylate cyclase OS=Saccharomyces cerevisiae (strain ATCC 204508 / S288c) GN=CYR1 PE=1 SV=2	151100	817930	761440	1079300	0.702371	0.120426	0.411399	0.121209
_S(ph)SFNSHAPTEPISR_3	P34219	>sp|P34219|TOD6_YEAST Transcriptional regulatory protein TOD6 OS=Saccharomyces cerevisiae (strain ATCC 204508 / S288c) GN=TOD6 PE=1 SV=1	88912	443170	275250	951190	0.490767	0.331697	0.411232	0.138096
_PATQAS(ph)SFPVVGGSPSVATK_2	P47035	>sp|P47035|NET1_YEAST Nucleolar protein NET1 OS=Saccharomyces cerevisiae (strain ATCC 204508 / S288c) GN=NET1 PE=1 SV=1	39727	175950	109620	422370	0.440804	0.380304	0.410554	0.162027
_AIT(ph)PSNEGVKPNTSLEGM(ox)TSS(ph)PM(ox)ESTQQSK_3	P17106	>sp|P17106|CBF1_YEAST Centromere-binding protein 1 OS=Saccharomyces cerevisiae (strain ATCC 204508 / S288c) GN=CBF1 PE=1 SV=2	131520	407330	210110	1688600	0.203455	0.61758	0.410518	0.2305
_NDS(ph)LPFQMLSSGAAVATQGGQNLNPLINDNSMK_3	P25339	>sp|P25339|PUF4_YEAST Pumilio homology domain family member 4 OS=Saccharomyces cerevisiae (strain ATCC 204508 / S288c) GN=PUF4 PE=1 SV=2	149060	264540	539130	484220	0.558332	0.262551	0.410442	0.0867368
_ATT(ph)PIAPGVESASQS(ph)ISSTPTPVSTDTPLHTVK_3	Q12514	>sp|Q12514|NOT5_YEAST General negative regulator of transcription subunit 5 OS=Saccharomyces cerevisiae (strain ATCC 204508 / S288c) GN=NOT5 PE=1 SV=1	68787	699890	725880	439080	1.02336	-0.202486	0.410436	0.370271
_FFS(ph)PSSNIPTDR_2	P38427	>sp|P38427|TSL1_YEAST Trehalose synthase complex regulatory subunit TSL1 OS=Saccharomyces cerevisiae (strain ATCC 204508 / S288c) GN=TSL1 PE=1 SV=1	289060	661420	622750	2027900	0.333326	0.486569	0.409947	0.173762
_KSES(ph)CTAADER_2	P48415	>sp|P48415|SEC16_YEAST COPII coat assembly protein SEC16 OS=Saccharomyces cerevisiae (strain ATCC 204508 / S288c) GN=SEC16 PE=1 SV=2	68072	121670	191270	285520	0.448678	0.370453	0.409566	0.0447815
_(ac)SQDAAIAEQTPVEHLSAVDSASHS(ph)VLSTPS(ph)NK_4	P39004;P39003	>sp|P39004|HXT7_YEAST High-affinity hexose transporter HXT6 OS=Saccharomyces cerevisiae (strain ATCC 204508 / S288c) GN=HXT7 PE=1 SV=1;>sp|P39003|HXT6_YEAST High-affinity hexose transporter HXT6 OS=Saccharomyces cerevisiae (strain ATCC 204508 / S288c) GN=H	1151200	1814200	5420400	2539700	0.672881	0.146097	0.409489	0.196419
_T(ph)SS(ph)SSVNVTAM(ox)R_2	P48361	>sp|P48361|ASK10_YEAST Activator of SKN7 protein 10 OS=Saccharomyces cerevisiae (strain ATCC 204508 / S288c) GN=ASK10 PE=1 SV=2	44159	112030	58409	558100	0.121461	0.697378	0.409419	0.239835
_T(ph)SQPQQQSPSLLQGEIR_3	Q03063	>sp|Q03063|DIG1_YEAST Down-regulator of invasive growth 1 OS=Saccharomyces cerevisiae (strain ATCC 204508 / S288c) GN=DIG1 PE=1 SV=1	688860	859880	1234600	3161000	0.253395	0.565387	0.409391	0.175878
_RSS(ph)FNVSS(ph)NNTSR_2	P40059	>sp|P40059|DOT6_YEAST Transcriptional regulatory protein DOT6 OS=Saccharomyces cerevisiae (strain ATCC 204508 / S288c) GN=DOT6 PE=1 SV=1	64841	189560	161680	500790	0.396807	0.421909	0.409358	0.153981
_HIS(ph)T(ph)DFSDDDLEKEEHNDQSLQPTVENR_4	Q06505	>sp|Q06505|IWS1_YEAST Transcription factor SPN1 OS=Saccharomyces cerevisiae (strain ATCC 204508 / S288c) GN=SPN1 PE=1 SV=1	855380	1438800	1876500	4319000	0.341189	0.477383	0.409286	0.14155
_FDLKDT(ph)EES(ph)LGHDSASASSASR_3	Q07541	>sp|Q07541|YD121_YEAST Uncharacterized protein YDL121C OS=Saccharomyces cerevisiae (strain ATCC 204508 / S288c) GN=YDL121C PE=1 SV=1	380860	1189300	1004100	2969700	0.421012	0.397421	0.409216	0.142817
_PTPPPAPEASAES(ph)GLS(ph)SK_3	P16862	>sp|P16862|PFKA2_YEAST ATP-dependent 6-phosphofructokinase subunit beta OS=Saccharomyces cerevisiae (strain ATCC 204508 / S288c) GN=PFK2 PE=1 SV=4	33343	557210	252480	484390	0.879222	-0.0608237	0.409199	0.352121
_NFSS(ph)YDDIVK_2	P20457	>sp|P20457|PRI2_YEAST DNA primase large subunit OS=Saccharomyces cerevisiae (strain ATCC 204508 / S288c) GN=PRI2 PE=1 SV=1	44915	115490	121860	279830	0.43347	0.38435	0.40891	0.110615
_IETSDS(ph)PR_2	P53858	>sp|P53858|BNI4_YEAST Protein BNI4 OS=Saccharomyces cerevisiae (strain ATCC 204508 / S288c) GN=BNI4 PE=1 SV=1	101280	777830	513450	1007700	0.704974	0.112447	0.408711	0.0880628
_QGS(ph)NKYS(ph)PSS(ph)PLTTNSIHQR_3	P13185	>sp|P13185|KIN1_YEAST Serine/threonine protein kinase KIN1 OS=Saccharomyces cerevisiae (strain ATCC 204508 / S288c) GN=KIN1 PE=1 SV=3	76551	272430	198630	688500	0.414094	0.402649	0.408371	0.159154
_NGDGLIS(ph)AAELK_2	P06787	>sp|P06787|CALM_YEAST Calmodulin OS=Saccharomyces cerevisiae (strain ATCC 204508 / S288c) GN=CMD1 PE=1 SV=1	44489	167530	136500	357780	0.48688	0.329523	0.408202	0.106612
_MS(ph)AAPVQDK_2	P19659	>sp|P19659|MED15_YEAST Mediator of RNA polymerase II transcription subunit 15 OS=Saccharomyces cerevisiae (strain ATCC 204508 / S288c) GN=GAL11 PE=1 SV=3	124330	177090	299470	481510	0.381777	0.434411	0.408094	0.0838176
_HVS(ph)RS(ph)SDITANDSSDEK_3	Q03656	>sp|Q03656|SKY1_YEAST Serine/threonine-protein kinase SKY1 OS=Saccharomyces cerevisiae (strain ATCC 204508 / S288c) GN=SKY1 PE=1 SV=1	434820	2238200	1696300	3754900	0.591193	0.224699	0.407946	0.02916
_S(ph)KQEASQMAAMAEK_3	P32589	>sp|P32589|HSP7F_YEAST Heat shock protein homolog SSE1 OS=Saccharomyces cerevisiae (strain ATCC 204508 / S288c) GN=SSE1 PE=1 SV=4	76364	89637	223160	200590	0.465728	0.349822	0.407775	0.0439826
_RLS(ph)RS(ph)SS(ph)NTTSK_2	P40468	>sp|P40468|TAO3_YEAST Cell morphogenesis protein PAG1 OS=Saccharomyces cerevisiae (strain ATCC 204508 / S288c) GN=TAO3 PE=1 SV=1	102030	140260	245030	381840	0.380491	0.434948	0.407719	0.0798731
_SLS(ph)RTPS(ph)NVS(ph)FK_2	P40468	>sp|P40468|TAO3_YEAST Cell morphogenesis protein PAG1 OS=Saccharomyces cerevisiae (strain ATCC 204508 / S288c) GN=TAO3 PE=1 SV=1	203700	583660	662330	1173500	0.512083	0.303323	0.407703	0.0396286
_LGS(ph)LVGQDSGYVGGLPK_2	P25293	>sp|P25293|NAP1_YEAST Nucleosome assembly protein OS=Saccharomyces cerevisiae (strain ATCC 204508 / S288c) GN=NAP1 PE=1 SV=2	10412000	14759000	20100000	49952000	0.285662	0.529496	0.407579	0.164493
_(ac)SQDAAIAEQTPVEHLSAVDSASHS(ph)VLSTPS(ph)NKAER_4	P39004;P39003	>sp|P39004|HXT7_YEAST High-affinity hexose transporter HXT6 OS=Saccharomyces cerevisiae (strain ATCC 204508 / S288c) GN=HXT7 PE=1 SV=1;>sp|P39003|HXT6_YEAST High-affinity hexose transporter HXT6 OS=Saccharomyces cerevisiae (strain ATCC 204508 / S288c) GN=H	33557000	36414000	53214000	149910000	0.200243	0.614562	0.407402	0.195412
_MFTSTS(ph)PRNS(ph)S(ph)SLDS(ph)DHDAYYSK_3	P53388	>sp|P53388|DIP5_YEAST Dicarboxylic amino acid permease OS=Saccharomyces cerevisiae (strain ATCC 204508 / S288c) GN=DIP5 PE=1 SV=1	109490	132670	216750	437490	0.296585	0.518195	0.40739	0.1423
_SNIS(ph)T(ph)KSLEPSSESVR_3	P38041	>sp|P38041|BOB1_YEAST Protein BOB1 OS=Saccharomyces cerevisiae (strain ATCC 204508 / S288c) GN=BOI1 PE=1 SV=1	611790	1216800	1630400	2978500	0.425692	0.388778	0.407235	0.0831312
_FNNS(ph)NNSIPR_2	Q03088	>sp|Q03088|SVL3_YEAST Styryl dye vacuolar localization protein 3 OS=Saccharomyces cerevisiae (strain ATCC 204508 / S288c) GN=SVL3 PE=1 SV=1	190110	375630	320130	1453100	0.226321	0.587535	0.406928	0.211774
_DKDVSDTLS(ph)PDFDSKGS(ph)ATGR_3	P39969	>sp|P39969|BOI2_YEAST Protein BOI2 OS=Saccharomyces cerevisiae (strain ATCC 204508 / S288c) GN=BOI2 PE=1 SV=1	1356000	47342	1846200	226390	0.134019	0.679611	0.406815	0.138528
_SVES(ph)FQSPQR_2	P40494	>sp|P40494|PRK1_YEAST Actin-regulating kinase PRK1 OS=Saccharomyces cerevisiae (strain ATCC 204508 / S288c) GN=PRK1 PE=1 SV=1	24483	80301	58214	219700	0.376163	0.437109	0.406636	0.17443
_S(ph)IEVNEEQDR_2	Q04225	>sp|Q04225|RRB1_YEAST Ribosome assembly protein RRB1 OS=Saccharomyces cerevisiae (strain ATCC 204508 / S288c) GN=RRB1 PE=1 SV=1	943650	1324500	1738700	4674500	0.265414	0.547683	0.406548	0.175828
_NLNVS(ph)GR_2	P14737	>sp|P14737|RAD9_YEAST DNA repair protein RAD9 OS=Saccharomyces cerevisiae (strain ATCC 204508 / S288c) GN=RAD9 PE=1 SV=2	253900	796280	585260	2245800	0.362686	0.450305	0.406496	0.178464
_DMS(ph)NLSTYEDLAHR_3	P31374	>sp|P31374|PSK1_YEAST Serine/threonine-protein kinase PSK1 OS=Saccharomyces cerevisiae (strain ATCC 204508 / S288c) GN=PSK1 PE=1 SV=2	52949	100380	144310	239420	0.435439	0.377513	0.406476	0.064954
_GRRS(ph)S(ph)AQEDAPIVIR_3	P35817	>sp|P35817|BDF1_YEAST Bromodomain-containing factor 1 OS=Saccharomyces cerevisiae (strain ATCC 204508 / S288c) GN=BDF1 PE=1 SV=3	512040	675760	833930	2693000	0.211826	0.600444	0.406135	0.199632
_S(ph)NSNVPSLFADFPAPPK_3	P48415	>sp|P48415|SEC16_YEAST COPII coat assembly protein SEC16 OS=Saccharomyces cerevisiae (strain ATCC 204508 / S288c) GN=SEC16 PE=1 SV=2	63128	178310	173440	421000	0.438927	0.373106	0.406017	0.114202
_QENINSSS(ph)NLFPEGK_2	P25558	>sp|P25558|BUD3_YEAST Bud site selection protein 3 OS=Saccharomyces cerevisiae (strain ATCC 204508 / S288c) GN=BUD3 PE=1 SV=2	17299	371150	101750	409070	0.769513	0.0422482	0.405881	0.115662
_ENS(ph)NFCDSNSDISQR_2	Q06708	>sp|Q06708|VAC14_YEAST Vacuole morphology and inheritance protein 14 OS=Saccharomyces cerevisiae (strain ATCC 204508 / S288c) GN=VAC14 PE=1 SV=1	64454	155730	173510	374880	0.430075	0.38152	0.405797	0.10302
_AASHSEEPLELPESTINS(ph)SFNDDSVNR_3	P48415	>sp|P48415|SEC16_YEAST COPII coat assembly protein SEC16 OS=Saccharomyces cerevisiae (strain ATCC 204508 / S288c) GN=SEC16 PE=1 SV=2	265620	684790	426710	2753100	0.205872	0.604265	0.405068	0.225258
_VS(ph)S(ph)KS(ph)ETFFTGNPK_2	P34226	>sp|P34226|SKT5_YEAST Protein SKT5 OS=Saccharomyces cerevisiae (strain ATCC 204508 / S288c) GN=SKT5 PE=1 SV=1	249940	686520	668310	1657200	0.427142	0.382722	0.404932	0.120465
_KFTSNGS(ph)SES(ph)ASSNK_2	P32350	>sp|P32350|KNS1_YEAST Dual specificity protein kinase KNS1 OS=Saccharomyces cerevisiae (strain ATCC 204508 / S288c) GN=KNS1 PE=1 SV=2	18064	47119	43126	127370	0.377925	0.431871	0.404898	0.153648
_KFS(ph)GLS(ph)LR_2	Q04279	>sp|Q04279|YMX6_YEAST Uncharacterized protein YMR086W OS=Saccharomyces cerevisiae (strain ATCC 204508 / S288c) GN=YMR086W PE=1 SV=1	147380	545880	482080	1075900	0.514681	0.294675	0.404678	0.0707121
_MIDS(ph)NVS(ph)KTYEEHIETV_2	P36035	>sp|P36035|JEN1_YEAST Carboxylic acid transporter protein homolog OS=Saccharomyces cerevisiae (strain ATCC 204508 / S288c) GN=JEN1 PE=1 SV=1	661080	427790	946970	1923900	0.156082	0.652952	0.404517	0.189899
_GKS(ph)DVELK_2	P48582	>sp|P48582|BRO1_YEAST Vacuolar-sorting protein BRO1 OS=Saccharomyces cerevisiae (strain ATCC 204508 / S288c) GN=BRO1 PE=1 SV=2	91578	473960	324250	861810	0.549089	0.25967	0.404379	0.0780021
_GS(ph)SWDEEEQDYEMVPR_3	Q07896	>sp|Q07896|NOC3_YEAST Nucleolar complex-associated protein 3 OS=Saccharomyces cerevisiae (strain ATCC 204508 / S288c) GN=NOC3 PE=1 SV=1	119120	100610	461910	167010	0.588573	0.220101	0.404337	0.189096
_AGTT(ph)VIGGGVGAIGK_2	Q12466	>sp|Q12466|TCB1_YEAST Tricalbin-1 OS=Saccharomyces cerevisiae (strain ATCC 204508 / S288c) GN=TCB1 PE=1 SV=1	190880	24469	165320	181810	-0.062435	0.871002	0.404283	0.301262
_MS(ph)IEPQLPDPK_2	P06243	>sp|P06243|CDC7_YEAST Cell division control protein 7 OS=Saccharomyces cerevisiae (strain ATCC 204508 / S288c) GN=CDC7 PE=1 SV=2	41709	73466	117610	167110	0.450214	0.356916	0.403565	0.0331905
_QEGELS(ph)NTR_2	Q01560	>sp|Q01560|NOP3_YEAST Nucleolar protein 3 OS=Saccharomyces cerevisiae (strain ATCC 204508 / S288c) GN=NPL3 PE=1 SV=1	52393	150630	147600	342730	0.449813	0.357041	0.403427	0.103536
_NESPAFEES(ph)PLTPNVSNLKPFPSQSNK_3	Q06144	>sp|Q06144|ORM2_YEAST Protein ORM2 OS=Saccharomyces cerevisiae (strain ATCC 204508 / S288c) GN=ORM2 PE=1 SV=1	99614	907510	495740	1167400	0.696934	0.109368	0.403151	0.0651775
_SAS(ph)VGSNQSEQDK_2	P08018	>sp|P08018|PBS2_YEAST MAP kinase kinase PBS2 OS=Saccharomyces cerevisiae (strain ATCC 204508 / S288c) GN=PBS2 PE=1 SV=4	78197	4151400	896070	2312100	1.05915	-0.254188	0.402482	0.383184
_MVSANYS(ph)R_2	P39523	>sp|P39523|YM11_YEAST Uncharacterized protein YMR124W OS=Saccharomyces cerevisiae (strain ATCC 204508 / S288c) GN=YMR124W PE=1 SV=2	132440	237020	351670	568930	0.424116	0.380274	0.402195	0.0641935
_TNTNLT(ph)AGS(ph)LK_2	P38800	>sp|P38800|YHO0_YEAST Uncharacterized protein YHR080C OS=Saccharomyces cerevisiae (strain ATCC 204508 / S288c) GN=YHR080C PE=1 SV=1	32607	111510	92524	250390	0.452944	0.351303	0.402123	0.120351
_IHS(ph)AGQLK_2	P47114	>sp|P47114|YJ24_YEAST Uncharacterized vacuolar membrane protein YJR054W OS=Saccharomyces cerevisiae (strain ATCC 204508 / S288c) GN=YJR054W PE=1 SV=1	25030	50437	46436	173080	0.268394	0.535498	0.401946	0.194997
_S(ph)RTNDS(ph)SLLPGYM(ox)DSATLLHPGK_3	P47031	>sp|P47031|IML2_YEAST Mitochondrial outer membrane protein IML2 OS=Saccharomyces cerevisiae (strain ATCC 204508 / S288c) GN=IML2 PE=1 SV=1	165890	796890	200790	4187500	0.0829219	0.720556	0.401739	0.246724
_TNLTS(ph)ANNLNNHNNNNYK_3	P33336	>sp|P33336|SKN1_YEAST Beta-glucan synthesis-associated protein SKN1 OS=Saccharomyces cerevisiae (strain ATCC 204508 / S288c) GN=SKN1 PE=1 SV=1	66742	263850	183000	611420	0.438052	0.364983	0.401517	0.147253
_RAS(ph)FSAFADEGR_3	Q06251	>sp|Q06251|YL177_YEAST Uncharacterized protein YLR177W OS=Saccharomyces cerevisiae (strain ATCC 204508 / S288c) GN=YLR177W PE=1 SV=1	15548	81385	51584	155760	0.52084	0.281912	0.401376	0.106383
_VQESPSGPLIYVLPQS(ph)STK_3	P25558	>sp|P25558|BUD3_YEAST Bud site selection protein 3 OS=Saccharomyces cerevisiae (strain ATCC 204508 / S288c) GN=BUD3 PE=1 SV=2	26391	57837	66730	144900	0.402865	0.398863	0.400864	0.11189
_LGITLS(ph)GLFK_2	P36004	>sp|P36004|KKQ8_YEAST Probable serine/threonine-protein kinase KKQ8 OS=Saccharomyces cerevisiae (strain ATCC 204508 / S288c) GN=KKQ8 PE=1 SV=2	27114	91870	114070	138220	0.623978	0.177397	0.400688	0.0941174
_YS(ph)PQNPR_2	P39523	>sp|P39523|YM11_YEAST Uncharacterized protein YMR124W OS=Saccharomyces cerevisiae (strain ATCC 204508 / S288c) GN=YMR124W PE=1 SV=2	24514	76344	52749	224500	0.3328	0.468441	0.400621	0.190057
_TNNS(ph)S(ph)NRHS(ph)FRR_3	P39935	>sp|P39935|IF4F1_YEAST Eukaryotic initiation factor 4F subunit p150 OS=Saccharomyces cerevisiae (strain ATCC 204508 / S288c) GN=TIF4631 PE=1 SV=2	451250	234210	147030	4538900	-0.487011	1.28735	0.400167	0.272458
_AAEAGETGAATS(ph)ATEGDNNNNTAAGDK_3	Q07478	>sp|Q07478|SUB2_YEAST ATP-dependent RNA helicase SUB2 OS=Saccharomyces cerevisiae (strain ATCC 204508 / S288c) GN=SUB2 PE=1 SV=1	1667100	3149500	3103900	10680000	0.269946	0.53033	0.400138	0.189989
_MHGS(ph)YS(ph)AESMR_2	P07866	>sp|P07866|LTE1_YEAST Guanine nucleotide exchange factor LTE1 OS=Saccharomyces cerevisiae (strain ATCC 204508 / S288c) GN=LTE1 PE=1 SV=2	79826	45262	186030	122580	0.367439	0.432686	0.400062	0.0496937
_AS(ph)EALKPDSQK_2	P22943	>sp|P22943|HSP12_YEAST 12 kDa heat shock protein OS=Saccharomyces cerevisiae (strain ATCC 204508 / S288c) GN=HSP12 PE=1 SV=1	41792	2474400	352580	1850300	0.926165	-0.126228	0.399968	0.397068
_TYS(ph)T(ph)TSAHSSINPAVLLTK_3	Q08269	>sp|Q08269|ALR1_YEAST Magnesium transporter ALR1 OS=Saccharomyces cerevisiae (strain ATCC 204508 / S288c) GN=ALR1 PE=1 SV=1	36554	192680	150830	293930	0.615553	0.183407	0.39948	0.0192147
_TKPYLDKVES(ph)K_2	Q04947	>sp|Q04947|RTN1_YEAST Reticulon-like protein 1 OS=Saccharomyces cerevisiae (strain ATCC 204508 / S288c) GN=RTN1 PE=1 SV=1	377470	944710	752350	2982500	0.299537	0.499282	0.39941	0.19209
_KIS(ph)GSIK_2	Q00684	>sp|Q00684|CDC14_YEAST Tyrosine-protein phosphatase CDC14 OS=Saccharomyces cerevisiae (strain ATCC 204508 / S288c) GN=CDC14 PE=1 SV=2	1655100	3908200	3472300	11721000	0.321793	0.476988	0.39939	0.177257
_(ac)S(ph)REDLS(ph)IAEDLNQVSK_3	Q12451	>sp|Q12451|OSH2_YEAST Oxysterol-binding protein homolog 2 OS=Saccharomyces cerevisiae (strain ATCC 204508 / S288c) GN=OSH2 PE=1 SV=1	32077	128780	130650	198490	0.609916	0.18789	0.398903	0.0540687
_LAELAENVS(ph)GDGKR_2	Q12136	>sp|Q12136|SAS10_YEAST Something about silencing protein 10 OS=Saccharomyces cerevisiae (strain ATCC 204508 / S288c) GN=SAS10 PE=1 SV=1	80478	131930	148880	446940	0.267159	0.529906	0.398532	0.181938
_M(ox)GSTS(ph)ATSKENT(ph)PEQDDVATK_3	P06786	>sp|P06786|TOP2_YEAST DNA topoisomerase 2 OS=Saccharomyces cerevisiae (strain ATCC 204508 / S288c) GN=TOP2 PE=1 SV=2	37369	295610	82244	839600	0.342593	0.453353	0.397973	0.223801
_S(ph)ISIELASLNELLQDK_2	P35845	>sp|P35845|OSH1_YEAST Oxysterol-binding protein homolog 1 OS=Saccharomyces cerevisiae (strain ATCC 204508 / S288c) GN=SWH1 PE=1 SV=4	104870	22228	187370	77761	0.252049	0.543861	0.397955	0.0614135
_SAS(ph)HTFHGIR_3	P36004	>sp|P36004|KKQ8_YEAST Probable serine/threonine-protein kinase KKQ8 OS=Saccharomyces cerevisiae (strain ATCC 204508 / S288c) GN=KKQ8 PE=1 SV=2	407470	2227500	1472600	3849200	0.557989	0.237553	0.397771	0.0650175
_DSES(ph)SQDLDKLTEAEK_3	Q02256	>sp|Q02256|PVH1_YEAST Tyrosine-protein phosphatase YVH1 OS=Saccharomyces cerevisiae (strain ATCC 204508 / S288c) GN=YVH1 PE=1 SV=1	441970	1244800	1161700	2956200	0.419701	0.375634	0.397668	0.123282
_QDTEQIIDAASVLS(ph)T(ph)ESPLLRK_3	P53858	>sp|P53858|BNI4_YEAST Protein BNI4 OS=Saccharomyces cerevisiae (strain ATCC 204508 / S288c) GN=BNI4 PE=1 SV=1	216700	151390	366100	559040	0.227741	0.567346	0.397543	0.138181
_NTS(ph)YQESPGLQERPK_3	P53865	>sp|P53865|CNM67_YEAST Chaotic nuclear migration protein 67 OS=Saccharomyces cerevisiae (strain ATCC 204508 / S288c) GN=CNM67 PE=1 SV=1	234430	962400	764780	1837200	0.513523	0.280801	0.397162	0.0765197
_SVGHHGGS(ph)TTSLR_3	P53599	>sp|P53599|SSK2_YEAST MAP kinase kinase kinase SSK2 OS=Saccharomyces cerevisiae (strain ATCC 204508 / S288c) GN=SSK2 PE=1 SV=1	138470	385360	375370	885040	0.433104	0.361096	0.3971	0.109079
_DDAAT(ph)KTPLIK_2	P38250	>sp|P38250|IST2_YEAST Increased sodium tolerance protein 2 OS=Saccharomyces cerevisiae (strain ATCC 204508 / S288c) GN=IST2 PE=1 SV=2	51059	170600	103570	522560	0.307162	0.486157	0.396659	0.202857
_KVAS(ph)NPALNTTK_2	P39955	>sp|P39955|SAP1_YEAST Protein SAP1 OS=Saccharomyces cerevisiae (strain ATCC 204508 / S288c) GN=SAP1 PE=1 SV=1	36044	110210	78836	312830	0.339892	0.453087	0.396489	0.183749
_VNSDFEDFS(ph)S(ph)DEETDQHNVLIQTK_3	P53743	>sp|P53743|ESF2_YEAST Pre-rRNA-processing protein ESF2 OS=Saccharomyces cerevisiae (strain ATCC 204508 / S288c) GN=ESF2 PE=1 SV=1	346290	2788200	1668500	3591600	0.682886	0.109964	0.396425	0.0762019
_ADNNLLPS(ph)PS(ph)PQLTEDIK_3	P53866	>sp|P53866|SQS1_YEAST Protein SQS1 OS=Saccharomyces cerevisiae (strain ATCC 204508 / S288c) GN=SQS1 PE=1 SV=1	74976	145040	191420	352160	0.407065	0.385252	0.396159	0.0869726
_AGS(ph)TVFALGTNVVSTGLGTIDK_3	P48231	>sp|P48231|TCB2_YEAST Tricalbin-2 OS=Saccharomyces cerevisiae (strain ATCC 204508 / S288c) GN=TCB2 PE=1 SV=1	21801	173870	132360	177330	0.78328	0.00855756	0.395919	0.240042
_CTGGIILT(ph)ASHNPGGPENDM(ox)GIK_3	P37012	>sp|P37012|PGM2_YEAST Phosphoglucomutase-2 OS=Saccharomyces cerevisiae (strain ATCC 204508 / S288c) GN=PGM2 PE=1 SV=1	3643600	16245000	5689100	64394000	0.193513	0.598126	0.395819	0.236485
_QDS(ph)TSKLEDFFS(ph)EDEEEEESGLR_3	P23615	>sp|P23615|SPT6_YEAST Transcription elongation factor SPT6 OS=Saccharomyces cerevisiae (strain ATCC 204508 / S288c) GN=SPT6 PE=1 SV=1	3662700	4431600	7096900	14148000	0.287267	0.504134	0.395701	0.141858
_ILSDS(ph)NNSKEILTLS(ph)PK_3	Q08206	>sp|Q08206|YO036_YEAST Uncharacterized protein YOL036W OS=Saccharomyces cerevisiae (strain ATCC 204508 / S288c) GN=YOL036W PE=1 SV=1	67896	159350	186040	359240	0.437762	0.353033	0.395397	0.0800833
_TETTPDNVGQDIPVNAHS(ph)VHEECSSNTPVEINGR_4	P05986	>sp|P05986|KAPC_YEAST cAMP-dependent protein kinase type 3 OS=Saccharomyces cerevisiae (strain ATCC 204508 / S288c) GN=TPK3 PE=1 SV=2	1691600	336410	1104600	3181700	-0.185093	0.97579	0.395349	0.314761
_NLS(ph)NLS(ph)LNEIKENEEVQEFNNEDFFFHDIPK_3	P53739	>sp|P53739|FPK1_YEAST Flippase kinase 1 OS=Saccharomyces cerevisiae (strain ATCC 204508 / S288c) GN=FPK1 PE=1 SV=1	166040	400870	336170	1222700	0.306346	0.484316	0.395331	0.185023
_QFGGFNNGS(ph)GSVMSTPVMVS(ph)QER_3	P38810	>sp|P38810|SFB3_YEAST SED5-binding protein 3 OS=Saccharomyces cerevisiae (strain ATCC 204508 / S288c) GN=SFB3 PE=1 SV=1	104550	114880	324600	228460	0.492024	0.298566	0.395295	0.0983291
_VVS(ph)EHAHK_3	P47035	>sp|P47035|NET1_YEAST Nucleolar protein NET1 OS=Saccharomyces cerevisiae (strain ATCC 204508 / S288c) GN=NET1 PE=1 SV=1	257900	1388400	841770	2625800	0.513742	0.276747	0.395245	0.109665
_EQDSPHS(ph)ES(ph)S(ph)DLPPILEK_3	Q12276	>sp|Q12276|HER1_YEAST HMG2-induced ER-remodeling protein 1 OS=Saccharomyces cerevisiae (strain ATCC 204508 / S288c) GN=HER1 PE=1 SV=1	39023	66901	63547	253180	0.211774	0.577997	0.394886	0.208333
_SQAYS(ph)CPFILK_2	P32047	>sp|P32047|MLF3_YEAST Protein MLF3 OS=Saccharomyces cerevisiae (strain ATCC 204508 / S288c) GN=MLF3 PE=1 SV=2	491710	2198000	1693800	3929700	0.537153	0.252332	0.394742	0.0568493
_GGS(ph)ITLESGSYK_2	P32583	>sp|P32583|SRP40_YEAST Suppressor protein SRP40 OS=Saccharomyces cerevisiae (strain ATCC 204508 / S288c) GN=SRP40 PE=1 SV=2	863720	3578400	2592600	7341200	0.477363	0.312078	0.39472	0.112905
_TIS(ph)AGS(ph)GVS(ph)TPTMALNR_2	Q06673	>sp|Q06673|ECM30_YEAST Protein ECM30 OS=Saccharomyces cerevisiae (strain ATCC 204508 / S288c) GN=ECM30 PE=1 SV=1	113180	169310	341900	345130	0.480129	0.3093	0.394715	0.0413892
_TLT(ph)PAPPR_2	Q99271	>sp|Q99271|NAH1_YEAST Na(+)/H(+) antiporter OS=Saccharomyces cerevisiae (strain ATCC 204508 / S288c) GN=NHA1 PE=1 SV=1	36369	147590	101650	324990	0.446376	0.342813	0.394595	0.137761
_MRS(ph)GTLDNDYVNR_3	Q03780	>sp|Q03780|YD239_YEAST Uncharacterized protein YDR239C OS=Saccharomyces cerevisiae (strain ATCC 204508 / S288c) GN=YDR239C PE=1 SV=1	50712	62400	131510	147540	0.413848	0.373725	0.393787	0.00832712
_DLS(ph)LSS(ph)VANAQDVTK_2	Q08967	>sp|Q08967|FLC1_YEAST Flavin carrier protein 1 OS=Saccharomyces cerevisiae (strain ATCC 204508 / S288c) GN=FLC1 PE=1 SV=1	187780	545850	533380	1178200	0.453387	0.334146	0.393767	0.0907886
_SQS(ph)LSEITPGPHSR_2	P35845	>sp|P35845|OSH1_YEAST Oxysterol-binding protein homolog 1 OS=Saccharomyces cerevisiae (strain ATCC 204508 / S288c) GN=SWH1 PE=1 SV=4	172760	2952300	950980	3287300	0.740728	0.0466789	0.393704	0.120609
_DVAS(ph)AIS(ph)LYDQSIYTNNR_2	P40052	>sp|P40052|YEQ9_YEAST Uncharacterized protein YER079W OS=Saccharomyces cerevisiae (strain ATCC 204508 / S288c) GN=YER079W PE=1 SV=1	22200	190090	92305	279950	0.618872	0.168121	0.393497	0.0391119
_MIS(ph)ISNLK_2	Q06106	>sp|Q06106|MRD1_YEAST Multiple RNA-binding domain-containing protein 1 OS=Saccharomyces cerevisiae (strain ATCC 204508 / S288c) GN=MRD1 PE=1 SV=1	40781	80295	104450	191100	0.408451	0.376572	0.392511	0.0839897
_ASSTTNTATLDDLVSSDIFMENLTANAT(ph)TSHTPTSK_3	P38427	>sp|P38427|TSL1_YEAST Trehalose synthase complex regulatory subunit TSL1 OS=Saccharomyces cerevisiae (strain ATCC 204508 / S288c) GN=TSL1 PE=1 SV=1	180710	2956600	1642800	1980700	0.958603	-0.173974	0.392314	0.437344
_AVNPLVTSS(ph)PIHM(ox)S(ph)PLQSR_3	Q06616	>sp|Q06616|YP174_YEAST Nuclear envelope protein YPR174C OS=Saccharomyces cerevisiae (strain ATCC 204508 / S288c) GN=YPR174C PE=1 SV=1	39255	336070	89341	899280	0.357156	0.427465	0.392311	0.221767
_KNEPSYELQNAHS(ph)GLFHS(ph)SNEELTNR_4	P08004	>sp|P08004|CHS1_YEAST Chitin synthase 1 OS=Saccharomyces cerevisiae (strain ATCC 204508 / S288c) GN=CHS1 PE=1 SV=2	215940	1034400	749690	1812800	0.540549	0.243661	0.392105	0.0586751
_TPS(ph)SATLKK_2	P23201	>sp|P23201|SPA2_YEAST Protein SPA2 OS=Saccharomyces cerevisiae (strain ATCC 204508 / S288c) GN=SPA2 PE=1 SV=1	99693	264690	259570	618010	0.41559	0.368258	0.391924	0.11474
_GQEVASEVKS(ph)ITIR_3	P34250	>sp|P34250|YKK5_YEAST Uncharacterized protein YKL105C OS=Saccharomyces cerevisiae (strain ATCC 204508 / S288c) GN=YKL105C PE=1 SV=1	32593	47281	75336	124170	0.363878	0.41933	0.391604	0.0885005
_RHDNS(ph)S(ph)DEEGIDENGNKK_2	P48234	>sp|P48234|NOL10_YEAST Ribosome biogenesis protein ENP2 OS=Saccharomyces cerevisiae (strain ATCC 204508 / S288c) GN=ENP2 PE=1 SV=2	204540	1896200	1319500	1781200	0.809631	-0.0271715	0.39123	0.282716
_KPS(ph)LAETLFK_2	P08678	>sp|P08678|CYAA_YEAST Adenylate cyclase OS=Saccharomyces cerevisiae (strain ATCC 204508 / S288c) GN=CYR1 PE=1 SV=2	22574	268890	111380	330220	0.693199	0.0892287	0.391214	0.0576155
_SNS(ph)LS(ph)S(ph)DGNSNQDVEIGK_2	Q02725	>sp|Q02725|VTC3_YEAST Vacuolar transporter chaperone 3 OS=Saccharomyces cerevisiae (strain ATCC 204508 / S288c) GN=VTC3 PE=1 SV=1	26088	70228	48650	228110	0.270642	0.511634	0.391138	0.204818
_STNQS(ph)NENDQSSLSQHNEKPGS(ph)AQFEHIAEFPFDSTVK_4	Q01896;Q12691;P13587	>sp|Q01896|ATN2_YEAST Sodium transport ATPase 2 OS=Saccharomyces cerevisiae (strain ATCC 204508 / S288c) GN=ENA2 PE=1 SV=1;>sp|Q12691|ATN5_YEAST Sodium transport ATPase 5 OS=Saccharomyces cerevisiae (strain ATCC 204508 / S288c) GN=ENA5 PE=1 SV=1;>sp|P13587	487520	3556000	2292300	4576700	0.672279	0.109591	0.390935	0.0861639
_VIQTATTLS(ph)PAK_2	P28006	>sp|P28006|GAC1_YEAST Serine/threonine-protein phosphatase 1 regulatory subunit GAC1 OS=Saccharomyces cerevisiae (strain ATCC 204508 / S288c) GN=GAC1 PE=1 SV=2	49239	100190	103040	289670	0.320697	0.461079	0.390888	0.161937
_LKIT(ph)DS(ph)NLENMEDVEAK_3	Q06315	>sp|Q06315|SKG3_YEAST Protein SKG3 OS=Saccharomyces cerevisiae (strain ATCC 204508 / S288c) GN=SKG3 PE=1 SV=1	208380	168880	429510	495420	0.314117	0.467395	0.390756	0.0605249
_S(ph)STVNANDILGNEENDGITK_2	Q04087	>sp|Q04087|LRS4_YEAST Monopolin complex subunit LRS4 OS=Saccharomyces cerevisiae (strain ATCC 204508 / S288c) GN=LRS4 PE=1 SV=1	47809	181380	143180	365270	0.476373	0.304025	0.390199	0.0977076
_(ac)SYNNPYQLETPFEESYELDEGS(ph)SAIGAEGHDFVGFMNK_4	P32867	>sp|P32867|SSO1_YEAST Protein SSO1 OS=Saccharomyces cerevisiae (strain ATCC 204508 / S288c) GN=SSO1 PE=1 SV=2	460360	85725	500840	475020	0.0366014	0.743604	0.390103	0.21702
_KGS(ph)SSTSLNNSK_3	Q05580	>sp|Q05580|YD266_YEAST LIM domain and RING finger protein YDR266C OS=Saccharomyces cerevisiae (strain ATCC 204508 / S288c) GN=YDR266C PE=1 SV=1	31100	424760	161450	493030	0.715278	0.0647297	0.390004	0.0964277
_HSVGS(ph)GAPHR_3	P29465	>sp|P29465|CHS3_YEAST Chitin synthase 3 OS=Saccharomyces cerevisiae (strain ATCC 204508 / S288c) GN=CHS3 PE=1 SV=3	219420	178360	315980	745560	0.158383	0.621185	0.389784	0.196326
_LLNS(ph)QQKD_2	Q02772	>sp|Q02772|PT191_YEAST Mitochondrial protein PET191 OS=Saccharomyces cerevisiae (strain ATCC 204508 / S288c) GN=PET191 PE=1 SV=1	147420	521240	313040	1474400	0.327043	0.451578	0.389311	0.195238
_IRT(ph)AQDQPVK_3	Q12276	>sp|Q12276|HER1_YEAST HMG2-induced ER-remodeling protein 1 OS=Saccharomyces cerevisiae (strain ATCC 204508 / S288c) GN=HER1 PE=1 SV=1	154420	974840	599900	1506300	0.589375	0.188978	0.389177	0.0279423
_QTHAPTT(ph)PNRTS(ph)PNR_2	Q03497	>sp|Q03497|STE20_YEAST Serine/threonine-protein kinase STE20 OS=Saccharomyces cerevisiae (strain ATCC 204508 / S288c) GN=STE20 PE=1 SV=1	159560	691810	534310	1239400	0.524869	0.253225	0.389047	0.0589652
_EQTSQQLSQS(ph)TQR_2	P40357	>sp|P40357|SEC9_YEAST Protein transport protein SEC9 OS=Saccharomyces cerevisiae (strain ATCC 204508 / S288c) GN=SEC9 PE=1 SV=1	41305	164990	101850	400880	0.391958	0.385557	0.388758	0.170027
_LFSSTKES(ph)FVGSK_3	P38041	>sp|P38041|BOB1_YEAST Protein BOB1 OS=Saccharomyces cerevisiae (strain ATCC 204508 / S288c) GN=BOI1 PE=1 SV=1	93524	333380	298930	624780	0.504646	0.272788	0.388717	0.0545569
_ELASGLS(ph)FPVGFK_2	P32449	>sp|P32449|AROG_YEAST Phospho-2-dehydro-3-deoxyheptonate aldolase, tyrosine-inhibited OS=Saccharomyces cerevisiae (strain ATCC 204508 / S288c) GN=ARO4 PE=1 SV=2	46844	72051	97937	206370	0.320293	0.457007	0.38865	0.1343
_SAS(ph)YTGAK_2	P31688	>sp|P31688|TPS2_YEAST Trehalose-phosphatase OS=Saccharomyces cerevisiae (strain ATCC 204508 / S288c) GN=TPS2 PE=1 SV=3	11831000	15735000	15525000	71802000	0.11801	0.65927	0.38864	0.229058
_KGS(ph)M(ox)ADVPK_3	P04806;P04807	>sp|P04806|HXKA_YEAST Hexokinase-1 OS=Saccharomyces cerevisiae (strain ATCC 204508 / S288c) GN=HXK1 PE=1 SV=2;>sp|P04807|HXKB_YEAST Hexokinase-2 OS=Saccharomyces cerevisiae (strain ATCC 204508 / S288c) GN=HXK2 PE=1 SV=4	801680	3131500	1426800	10534000	0.250362	0.526841	0.388601	0.223183
_GQNTHPS(ph)VDK_2	Q03661	>sp|Q03661|ESC1_YEAST Silent chromatin protein ESC1 OS=Saccharomyces cerevisiae (strain ATCC 204508 / S288c) GN=ESC1 PE=1 SV=1	28139	317270	177100	301730	0.79891	-0.0218105	0.38855	0.283087
_QQSLNS(ph)NSTSK_2	Q00402	>sp|Q00402|NUM1_YEAST Nuclear migration protein NUM1 OS=Saccharomyces cerevisiae (strain ATCC 204508 / S288c) GN=NUM1 PE=1 SV=2	671580	706880	1002300	2834100	0.1739	0.603069	0.388485	0.200905
_FQES(ph)ES(ph)FRSHGS(ph)PIHNNQLSR_3	P32900	>sp|P32900|SKG6_YEAST Protein SKG6 OS=Saccharomyces cerevisiae (strain ATCC 204508 / S288c) GN=SKG6 PE=1 SV=2	177030	631310	517730	1291500	0.466056	0.310852	0.388454	0.0983522
_KES(ph)PTTYGAAYPYGGPLLQPNPIMPGHPHNIS(ph)SPIYGIR_4	P25339	>sp|P25339|PUF4_YEAST Pumilio homology domain family member 4 OS=Saccharomyces cerevisiae (strain ATCC 204508 / S288c) GN=PUF4 PE=1 SV=2	223590	195800	328140	796620	0.166607	0.609439	0.388023	0.195159
_RRS(ph)T(ph)NYM(ox)DALNSR_3	P43598	>sp|P43598|IGD1_YEAST Inhibitor of glycogen debranching 1 OS=Saccharomyces cerevisiae (strain ATCC 204508 / S288c) GN=IGD1 PE=1 SV=1	358990	2572800	676070	8154800	0.274909	0.501007	0.387958	0.231938
_S(ph)SVALATAQR_2	P53883	>sp|P53883|NOP13_YEAST Nucleolar protein 13 OS=Saccharomyces cerevisiae (strain ATCC 204508 / S288c) GN=NOP13 PE=1 SV=2	182700	684540	573090	1301400	0.496484	0.279012	0.387748	0.0703981
_LDPGIMFSS(ph)PTEEVS(ph)PVEPK_3	Q12263	>sp|Q12263|GIN4_YEAST Serine/threonine-protein kinase GIN4 OS=Saccharomyces cerevisiae (strain ATCC 204508 / S288c) GN=GIN4 PE=1 SV=1	152740	114500	233720	446180	0.184743	0.590705	0.387724	0.173776
_S(ph)DSGTVLGAIPLNSR_3	Q08422	>sp|Q08422|YO052_YEAST AN1-type zinc finger protein YOR052C OS=Saccharomyces cerevisiae (strain ATCC 204508 / S288c) GN=YOR052C PE=1 SV=1	106310	185230	209240	561080	0.294071	0.481313	0.387692	0.164914
_SSS(ph)KIEAPSPSVNK_3	P47035	>sp|P47035|NET1_YEAST Nucleolar protein NET1 OS=Saccharomyces cerevisiae (strain ATCC 204508 / S288c) GN=NET1 PE=1 SV=1	125130	463840	341760	1012400	0.43636	0.338984	0.387672	0.130281
_NNNTSQISS(ph)TNTPDVIDLK_2	Q12386	>sp|Q12386|ARP8_YEAST Actin-like protein ARP8 OS=Saccharomyces cerevisiae (strain ATCC 204508 / S288c) GN=ARP8 PE=1 SV=1	64641	105360	52811	768490	-0.0877837	0.862962	0.387589	0.255678
_KLEDAEGQENAASS(ph)E_2	P32445	>sp|P32445|RIM1_YEAST Single-stranded DNA-binding protein RIM1, mitochondrial OS=Saccharomyces cerevisiae (strain ATCC 204508 / S288c) GN=RIM1 PE=1 SV=1	186810	378260	375430	1121600	0.303129	0.472048	0.387588	0.170899
_LDGS(ph)TQVNDR_2	P31380	>sp|P31380|FUN30_YEAST ATP-dependent helicase FUN30 OS=Saccharomyces cerevisiae (strain ATCC 204508 / S288c) GN=FUN30 PE=1 SV=1	77260	151800	154160	453250	0.300017	0.475066	0.387542	0.170495
_DALIGHGT(ph)SFLLQDR_3	P22138	>sp|P22138|RPA2_YEAST DNA-directed RNA polymerase I subunit RPA135 OS=Saccharomyces cerevisiae (strain ATCC 204508 / S288c) GN=RPA135 PE=1 SV=1	38286	96060	114220	191810	0.474702	0.300329	0.387515	0.0365779
_APS(ph)TLSYNHSK_2	Q03735	>sp|Q03735|NAB6_YEAST RNA-binding protein NAB6 OS=Saccharomyces cerevisiae (strain ATCC 204508 / S288c) GN=NAB6 PE=1 SV=1	145300	497720	262420	1640200	0.256731	0.517912	0.387322	0.217482
_IVS(ph)GLELSDTK_2	Q07350	>sp|Q07350|PRP11_YEAST Pre-mRNA-splicing factor PRP11 OS=Saccharomyces cerevisiae (strain ATCC 204508 / S288c) GN=PRP11 PE=1 SV=1	48755	86335	114490	218610	0.370748	0.403483	0.387116	0.103192
_ELS(ph)GGYEDVDSALHSEEAS(ph)FHSL_3	P40563	>sp|P40563|AIM21_YEAST Altered inheritance of mitochondria protein 21 OS=Saccharomyces cerevisiae (strain ATCC 204508 / S288c) GN=AIM21 PE=1 SV=1	119790	176650	303800	414120	0.404167	0.370013	0.38709	0.0401596
_VNS(ph)SGQYSR_2	P43571	>sp|P43571|BST1_YEAST GPI inositol-deacylase OS=Saccharomyces cerevisiae (strain ATCC 204508 / S288c) GN=BST1 PE=1 SV=1	98514	137640	141210	570730	0.156367	0.617686	0.387027	0.218721
_LNNQPQVETEANEES(ph)DDANS(ph)M(ox)IK_3	P35845	>sp|P35845|OSH1_YEAST Oxysterol-binding protein homolog 1 OS=Saccharomyces cerevisiae (strain ATCC 204508 / S288c) GN=SWH1 PE=1 SV=4	124560	1147400	274460	3095000	0.3431	0.430946	0.387023	0.225549
_DSS(ph)PVPS(ph)DLDEK_2	P38266	>sp|P38266|AIM3_YEAST Altered inheritance of mitochondria protein 3 OS=Saccharomyces cerevisiae (strain ATCC 204508 / S288c) GN=AIM3 PE=1 SV=3	42750	152040	116000	332770	0.433522	0.340186	0.386854	0.127429
_TLGS(ph)NAQPR_2	Q03177	>sp|Q03177|YMZ2_YEAST WD repeat-containing protein YMR102C OS=Saccharomyces cerevisiae (strain ATCC 204508 / S288c) GN=YMR102C PE=1 SV=1	41499	152460	96840	387860	0.368017	0.405519	0.386768	0.176502
_(ac)M(ox)VDDS(ph)NYLT(ph)PHETALAVVATAM(ox)K_3	P38750	>sp|P38750|YHA8_YEAST Uncharacterized transporter YHL008C OS=Saccharomyces cerevisiae (strain ATCC 204508 / S288c) GN=YHL008C PE=1 SV=1	119410	190900	245470	549630	0.312958	0.459265	0.386111	0.142434
_STTAGAVPSAATTSTT(ph)STTSNSK_2	P31383	>sp|P31383|2AAA_YEAST Protein phosphatase PP2A regulatory subunit A OS=Saccharomyces cerevisiae (strain ATCC 204508 / S288c) GN=TPD3 PE=1 SV=3	48015	72942	85754	241540	0.251877	0.520011	0.385944	0.179905
_QFS(ph)VSDLSTTR_2	P53135	>sp|P53135|SLD3_YEAST DNA replication regulator SLD3 OS=Saccharomyces cerevisiae (strain ATCC 204508 / S288c) GN=SLD3 PE=1 SV=1	25382	103980	79308	196800	0.494791	0.277075	0.385933	0.0824696
_TSS(ph)SM(ox)SVGNNKK_3	P38426	>sp|P38426|TPS3_YEAST Trehalose synthase complex regulatory subunit TPS3 OS=Saccharomyces cerevisiae (strain ATCC 204508 / S288c) GN=TPS3 PE=1 SV=3	72686	612080	88240	2972700	0.0842147	0.686343	0.385279	0.247903
_NLSNENCS(ph)FKK_2	P11972	>sp|P11972|SST2_YEAST Protein SST2 OS=Saccharomyces cerevisiae (strain ATCC 204508 / S288c) GN=SST2 PE=1 SV=2	1079200	452570	797040	3605600	-0.131622	0.901292	0.384835	0.278409
_SKS(ph)LPIT(ph)PK_2	P40187	>sp|P40187|PIG2_YEAST GSY2-interacting protein PIG2 OS=Saccharomyces cerevisiae (strain ATCC 204508 / S288c) GN=PIG2 PE=1 SV=1	50455	216150	144280	444430	0.456302	0.313048	0.384675	0.125872
_FAIPAINVTSSS(ph)TAVAALEAAR_3	P14540	>sp|P14540|ALF_YEAST Fructose-bisphosphate aldolase OS=Saccharomyces cerevisiae (strain ATCC 204508 / S288c) GN=FBA1 PE=1 SV=3	84171	195470	128470	752470	0.183639	0.585409	0.384524	0.224738
_S(ph)LQQQQQQQQQQK_2	P48562	>sp|P48562|CLA4_YEAST Serine/threonine-protein kinase CLA4 OS=Saccharomyces cerevisiae (strain ATCC 204508 / S288c) GN=CLA4 PE=1 SV=1	92917	374910	314350	649700	0.529318	0.238786	0.384052	0.0340957
_KDS(ph)INEFLANK_2	Q12032	>sp|Q12032|AIM41_YEAST Altered inheritance of mitochondria protein 41, mitochondrial OS=Saccharomyces cerevisiae (strain ATCC 204508 / S288c) GN=AIM41 PE=1 SV=1	62338	160950	107300	547850	0.235847	0.531971	0.383909	0.213174
_DTIPS(ph)SQSR_2	P07269	>sp|P07269|PHO2_YEAST Regulatory protein PHO2 OS=Saccharomyces cerevisiae (strain ATCC 204508 / S288c) GN=PHO2 PE=1 SV=1	567550	62767	252980	824060	-0.350918	1.11823	0.383655	0.374726
_RPSLLS(ph)QR_2	P34761	>sp|P34761|WHI3_YEAST Protein WHI3 OS=Saccharomyces cerevisiae (strain ATCC 204508 / S288c) GN=WHI3 PE=1 SV=1	347120	64984	212390	619420	-0.213346	0.979179	0.382917	0.32588
_AS(ph)LDYDPSVPNTSYAPVQSASPVVKPTDNT(ph)S(ph)SSSNKK_4	Q03640	>sp|Q03640|TCB3_YEAST Tricalbin-3 OS=Saccharomyces cerevisiae (strain ATCC 204508 / S288c) GN=TCB3 PE=1 SV=1	792680	1895900	1296400	6757400	0.213641	0.551964	0.382803	0.217136
_SHGQTVATNYNSSMTAPSSS(ph)S(ph)SSSSQNLR_3	P39960	>sp|P39960|BEM2_YEAST GTPase-activating protein BEM2/IPL2 OS=Saccharomyces cerevisiae (strain ATCC 204508 / S288c) GN=BEM2 PE=1 SV=1	82431	170190	249200	327940	0.480457	0.28486	0.382659	0.00884416
_RTIS(ph)GSSAHHS(ph)R_3	P33332	>sp|P33332|SEC3_YEAST Exocyst complex component SEC3 OS=Saccharomyces cerevisiae (strain ATCC 204508 / S288c) GN=SEC3 PE=1 SV=1	95415	145310	106290	759740	0.0468758	0.718369	0.382623	0.244367
_APQIIHSSPEFITS(ph)TR_3	Q12132	>sp|Q12132|USV1_YEAST Nutrient and stress factor 1 OS=Saccharomyces cerevisiae (strain ATCC 204508 / S288c) GN=USV1 PE=1 SV=1	80006	194580	148370	611100	0.268224	0.497014	0.382619	0.198217
_YERPPQPPPAYDPNHRPPS(ph)SSENS(ph)AAANVNDGQTPYHFR_5	Q12412	>sp|Q12412|PNS1_YEAST Protein PNS1 OS=Saccharomyces cerevisiae (strain ATCC 204508 / S288c) GN=PNS1 PE=1 SV=1	3699800	960690	2860200	7234100	-0.111782	0.876801	0.38251	0.292349
_RKGS(ph)TS(ph)PEPTK_2	P34223	>sp|P34223|UBX1_YEAST UBX domain-containing protein 1 OS=Saccharomyces cerevisiae (strain ATCC 204508 / S288c) GN=SHP1 PE=1 SV=1	10443000	5008900	11237000	27088000	0.0318251	0.733035	0.38243	0.238558
_GASQAT(ph)EGVVLGQR_2	Q08873	>sp|Q08873|SCP1_YEAST Transgelin OS=Saccharomyces cerevisiae (strain ATCC 204508 / S288c) GN=SCP1 PE=1 SV=1	28015	77176	106370	118050	0.579429	0.184584	0.382006	0.0969508
_KNTNSNNS(ph)ILK_2	P52870	>sp|P52870|SC6B1_YEAST Protein transport protein SBH1 OS=Saccharomyces cerevisiae (strain ATCC 204508 / S288c) GN=SBH1 PE=1 SV=1	165850	1078600	515370	2015200	0.492404	0.271458	0.381931	0.136308
[truncated: 11,923 more rows]

## Sheet: All Data
Peptide/Charge	Accession	Description	Intensity Rad53 KO	Intensity Rad53 KO	Intensity Rad53 Overexp	Intensity Rad53 Overexp
[truncated: 33,065 more rows]

[truncated: 1 more sheets: Column Headers]
